# Supplementary material
Source: publisher figshare collection journal article supplement (https://acs.figshare.com/ndownloader/files/6979388)
Supplement: Supplementary file 1 [file 6979388]

 
data_em334 
  
_audit_creation_method            SHELXL-2014/6 
_chemical_name_systematic         ? 
_chemical_name_common             ? 
_chemical_melting_point           ? 
_chemical_formula_moiety          'C21 H18 B N6 Ni' 
_chemical_formula_sum 
 'C21 H18 B N6 Ni' 
_chemical_formula_weight          423.93 
  
loop_ 
 _atom_type_symbol 
 _atom_type_description 
 _atom_type_scat_dispersion_real 
 _atom_type_scat_dispersion_imag 
 _atom_type_scat_source 
 'C'  'C'   0.0181   0.0091 
 'International Tables Vol C Tables 4.2.6.8 and 6.1.1.4' 
 'H'  'H'   0.0000   0.0000 
 'International Tables Vol C Tables 4.2.6.8 and 6.1.1.4' 
 'B'  'B'   0.0090   0.0039 
 'International Tables Vol C Tables 4.2.6.8 and 6.1.1.4' 
 'N'  'N'   0.0311   0.0180 
 'International Tables Vol C Tables 4.2.6.8 and 6.1.1.4' 
 'Ni'  'Ni'  -3.0029   0.5091 
 'International Tables Vol C Tables 4.2.6.8 and 6.1.1.4' 
  
_space_group_crystal_system       orthorhombic 
_space_group_IT_number            61 
_space_group_name_H-M_alt         'P b c a' 
_space_group_name_Hall            '-P 2ac 2ab' 
  
_shelx_space_group_comment 
; 
The symmetry employed for this shelxl refinement is uniquely defined 
by the following loop, which should always be used as a source of 
symmetry information in preference to the above space-group names. 
They are only intended as comments. 
; 
  
loop_ 
 _space_group_symop_operation_xyz 
 'x, y, z' 
 '-x+1/2, -y, z+1/2' 
 '-x, y+1/2, -z+1/2' 
 'x+1/2, -y+1/2, -z' 
 '-x, -y, -z' 
 'x-1/2, y, -z-1/2' 
 'x, -y-1/2, z-1/2' 
 '-x-1/2, y-1/2, z' 
  
_cell_length_a                    14.9798(2) 
_cell_length_b                    13.0128(2) 
_cell_length_c                    19.5957(2) 
_cell_angle_alpha                 90 
_cell_angle_beta                  90 
_cell_angle_gamma                 90 
_cell_volume                      3819.79(10) 
_cell_formula_units_Z             8 
_cell_measurement_temperature     85(2) 
_cell_measurement_reflns_used     19760 
_cell_measurement_theta_min       4.4720 
_cell_measurement_theta_max       69.1290 
  
_exptl_crystal_description        needle 
_exptl_crystal_colour             yellow 
_exptl_crystal_density_meas       ? 
_exptl_crystal_density_method     ? 
_exptl_crystal_density_diffrn     1.474 
_exptl_crystal_F_000              1752 
_exptl_transmission_factor_min    ? 
_exptl_transmission_factor_max    ? 
_exptl_crystal_size_max           0.200 
_exptl_crystal_size_mid           0.030 
_exptl_crystal_size_min           0.010 
_exptl_absorpt_coefficient_mu     1.621 
_shelx_estimated_absorpt_T_min    0.738 
_shelx_estimated_absorpt_T_max    0.984 
_exptl_absorpt_correction_type    multi-scan 
_exptl_absorpt_correction_T_min   0.76394 
_exptl_absorpt_correction_T_max   1.00000 
_exptl_absorpt_process_details     
; 
CrysAlisPro 1.171.38.41 (Rigaku Oxford Diffraction, 2015) 
Empirical absorption correction using spherical harmonics, 
 implemented in SCALE3 ABSPACK scaling algorithm. 
; 
_exptl_absorpt_special_details    ? 
_diffrn_ambient_temperature       85(2) 
_diffrn_radiation_wavelength      1.54184 
_diffrn_radiation_type            CuK\a 
_diffrn_source                    'micro-focus rotating anode' 
_diffrn_measurement_device_type   'Rigaku Saturn 944+ CCD' 
_diffrn_measurement_method        '\w scans' 
_diffrn_detector_area_resol_mean  ? 
_diffrn_reflns_number             54490 
_diffrn_reflns_av_unetI/netI      0.0386 
_diffrn_reflns_av_R_equivalents   0.1019 
_diffrn_reflns_limit_h_min        -18 
_diffrn_reflns_limit_h_max        16 
_diffrn_reflns_limit_k_min        -15 
_diffrn_reflns_limit_k_max        15 
_diffrn_reflns_limit_l_min        -23 
_diffrn_reflns_limit_l_max        23 
_diffrn_reflns_theta_min          4.513 
_diffrn_reflns_theta_max          69.496 
_diffrn_reflns_theta_full         67.684 
_diffrn_measured_fraction_theta_max   0.994 
_diffrn_measured_fraction_theta_full  1.000 
_diffrn_reflns_Laue_measured_fraction_max    0.994 
_diffrn_reflns_Laue_measured_fraction_full   1.000 
_diffrn_reflns_point_group_measured_fraction_max   0.994 
_diffrn_reflns_point_group_measured_fraction_full  1.000 
_reflns_number_total              3559 
_reflns_number_gt                 3198 
_reflns_threshold_expression      'I > 2\s(I)' 
_reflns_Friedel_coverage          0.000 
_reflns_Friedel_fraction_max      . 
_reflns_Friedel_fraction_full     . 
  
_reflns_special_details 
; 
 Reflections were merged by SHELXL according to the crystal 
 class for the calculation of statistics and refinement. 
  
 _reflns_Friedel_fraction is defined as the number of unique 
 Friedel pairs measured divided by the number that would be 
 possible theoretically, ignoring centric projections and 
 systematic absences. 
; 
  
_computing_data_collection      'CrystalClear-SM Expert 2.0 r16 (Rigaku, 2014)' 
_computing_cell_refinement        'CrysAlisPro 1.171.38.41 (Rigaku OD, 2015)' 
_computing_data_reduction         'CrysAlisPro 1.171.38.41 (Rigaku OD, 2015)' 
_computing_structure_solution   'SHELXT (Sheldrick, 2014)' 
_computing_structure_refinement 'SHELXL-2014/6 (Sheldrick, 2014)' 
_computing_molecular_graphics     'Bruker SHELXTL'
_computing_publication_material   'Bruker SHELXTL'
_refine_special_details           ? 
_refine_ls_structure_factor_coef  Fsqd 
_refine_ls_matrix_type            full 
_refine_ls_weighting_scheme       calc 
_refine_ls_weighting_details 
'w=1/[\s^2^(Fo^2^)+(0.0734P)^2^+3.0234P] where P=(Fo^2^+2Fc^2^)/3' 
_atom_sites_solution_primary      ? 
_atom_sites_solution_secondary    ? 
_atom_sites_solution_hydrogens    geom 
_refine_ls_hydrogen_treatment     constr 
_refine_ls_extinction_method      SHELXL 
_refine_ls_extinction_coef        0.00036(8) 
_refine_ls_extinction_expression 
 'Fc^*^=kFc[1+0.001xFc^2^\l^3^/sin(2\q)]^-1/4^' 
_refine_ls_number_reflns          3559 
_refine_ls_number_parameters      263 
_refine_ls_number_restraints      0 
_refine_ls_R_factor_all           0.0501 
_refine_ls_R_factor_gt            0.0450 
_refine_ls_wR_factor_ref          0.1257 
_refine_ls_wR_factor_gt           0.1171 
_refine_ls_goodness_of_fit_ref    1.073 
_refine_ls_restrained_S_all       1.073 
_refine_ls_shift/su_max           0.001 
_refine_ls_shift/su_mean          0.000 
  
loop_ 
 _atom_site_label 
 _atom_site_type_symbol 
 _atom_site_fract_x 
 _atom_site_fract_y 
 _atom_site_fract_z 
 _atom_site_U_iso_or_equiv 
 _atom_site_adp_type 
 _atom_site_occupancy 
 _atom_site_site_symmetry_order 
 _atom_site_calc_flag 
 _atom_site_refinement_flags_posn 
 _atom_site_refinement_flags_adp 
 _atom_site_refinement_flags_occupancy 
 _atom_site_disorder_assembly 
 _atom_site_disorder_group 
Ni1 Ni 0.71682(2) 0.34082(3) 0.66723(2) 0.01536(17) Uani 1 1 d . . . . . 
N1 N 0.80573(12) 0.41348(14) 0.72736(8) 0.0172(4) Uani 1 1 d . . . . . 
N2 N 0.83749(12) 0.36191(14) 0.78322(9) 0.0174(4) Uani 1 1 d . . . . . 
N3 N 0.65136(12) 0.30325(14) 0.75293(8) 0.0177(4) Uani 1 1 d . . . . . 
N4 N 0.69995(12) 0.26511(14) 0.80612(9) 0.0173(4) Uani 1 1 d . . . . . 
N5 N 0.79133(12) 0.21162(15) 0.67340(8) 0.0173(4) Uani 1 1 d . . . . . 
N6 N 0.82314(12) 0.18497(14) 0.73630(8) 0.0174(4) Uani 1 1 d . . . . . 
C1 C 0.83846(14) 0.50853(17) 0.73061(11) 0.0187(4) Uani 1 1 d . . . . . 
H1 H 0.8267 0.5613 0.6983 0.022 Uiso 1 1 calc R U . . . 
C2 C 0.89259(14) 0.51972(17) 0.78843(11) 0.0205(5) Uani 1 1 d . . . . . 
H2 H 0.9243 0.5792 0.8026 0.025 Uiso 1 1 calc R U . . . 
C3 C 0.88967(13) 0.42503(17) 0.82036(10) 0.0191(4) Uani 1 1 d . . . . . 
H3 H 0.9194 0.4074 0.8615 0.023 Uiso 1 1 calc R U . . . 
C4 C 0.56910(14) 0.31992(17) 0.77641(11) 0.0198(4) Uani 1 1 d . . . . . 
H4 H 0.5210 0.3462 0.7500 0.024 Uiso 1 1 calc R U . . . 
C5 C 0.56364(15) 0.29341(17) 0.84511(11) 0.0209(5) Uani 1 1 d . . . . . 
H5 H 0.5129 0.2978 0.8740 0.025 Uiso 1 1 calc R U . . . 
C6 C 0.64779(14) 0.25948(17) 0.86205(10) 0.0195(4) Uani 1 1 d . . . . . 
H6 H 0.6660 0.2360 0.9058 0.023 Uiso 1 1 calc R U . . . 
C7 C 0.82448(14) 0.14391(17) 0.62909(11) 0.0198(4) Uani 1 1 d . . . . . 
H7 H 0.8128 0.1438 0.5814 0.024 Uiso 1 1 calc R U . . . 
C8 C 0.87878(15) 0.07319(18) 0.66286(11) 0.0212(5) Uani 1 1 d . . . . . 
H8 H 0.9106 0.0172 0.6435 0.025 Uiso 1 1 calc R U . . . 
C9 C 0.87627(14) 0.10218(17) 0.73045(11) 0.0207(4) Uani 1 1 d . . . . . 
H9 H 0.9069 0.0692 0.7668 0.025 Uiso 1 1 calc R U . . . 
C10 C 0.75702(15) 0.40413(16) 0.58267(10) 0.0187(4) Uani 1 1 d . . . . . 
C11 C 0.84004(15) 0.44883(18) 0.57133(11) 0.0220(5) Uani 1 1 d . . . . . 
H11 H 0.8859 0.4426 0.6046 0.026 Uiso 1 1 calc R U . . . 
C12 C 0.85605(17) 0.50312(19) 0.51082(11) 0.0273(5) Uani 1 1 d . . . . . 
H12 H 0.9125 0.5345 0.5035 0.033 Uiso 1 1 calc R U . . . 
C13 C 0.79029(18) 0.51144(19) 0.46158(12) 0.0297(6) Uani 1 1 d . . . . . 
H13 H 0.8014 0.5495 0.4211 0.036 Uiso 1 1 calc R U . . . 
C14 C 0.70827(17) 0.46438(18) 0.47126(11) 0.0255(5) Uani 1 1 d . . . . . 
H14 H 0.6634 0.4692 0.4371 0.031 Uiso 1 1 calc R U . . . 
C15 C 0.69164(15) 0.40996(17) 0.53117(10) 0.0207(5) Uani 1 1 d . . . . . 
C16 C 0.61258(15) 0.34816(16) 0.54616(11) 0.0198(5) Uani 1 1 d . . . . . 
C17 C 0.53890(16) 0.33111(19) 0.50403(11) 0.0242(5) Uani 1 1 d . . . . . 
H17 H 0.5311 0.3709 0.4638 0.029 Uiso 1 1 calc R U . . . 
C18 C 0.47692(15) 0.25578(19) 0.52107(11) 0.0245(5) Uani 1 1 d . . . . . 
H18 H 0.4269 0.2438 0.4923 0.029 Uiso 1 1 calc R U . . . 
C19 C 0.48808(15) 0.19817(18) 0.58001(11) 0.0220(5) Uani 1 1 d . . . . . 
H19 H 0.4477 0.1440 0.5900 0.026 Uiso 1 1 calc R U . . . 
C20 C 0.55847(14) 0.21928(17) 0.62490(10) 0.0198(4) Uani 1 1 d . . . . . 
H20 H 0.5642 0.1815 0.6662 0.024 Uiso 1 1 calc R U . . . 
C21 C 0.61975(14) 0.29553(17) 0.60890(10) 0.0185(4) Uani 1 1 d . . . . . 
B1 B 0.80149(16) 0.25317(19) 0.79847(12) 0.0177(5) Uani 1 1 d . . . . . 
H1B H 0.8287 0.2246 0.8410 0.021 Uiso 1 1 calc R U . . . 
  
loop_ 
 _atom_site_aniso_label 
 _atom_site_aniso_U_11 
 _atom_site_aniso_U_22 
 _atom_site_aniso_U_33 
 _atom_site_aniso_U_23 
 _atom_site_aniso_U_13 
 _atom_site_aniso_U_12 
Ni1 0.0109(2) 0.0226(3) 0.0126(2) 0.00068(12) -0.00124(12) 0.00037(13) 
N1 0.0138(8) 0.0223(9) 0.0155(8) 0.0014(7) -0.0012(6) 0.0013(7) 
N2 0.0118(8) 0.0257(9) 0.0147(8) 0.0006(7) -0.0020(6) 0.0010(7) 
N3 0.0123(8) 0.0269(9) 0.0140(8) 0.0015(7) -0.0034(6) 0.0005(7) 
N4 0.0135(9) 0.0251(9) 0.0134(8) 0.0008(7) -0.0022(7) -0.0001(7) 
N5 0.0129(9) 0.0237(10) 0.0154(9) 0.0021(7) -0.0022(6) -0.0011(7) 
N6 0.0120(9) 0.0236(9) 0.0166(8) -0.0003(7) -0.0030(7) 0.0009(7) 
C1 0.0119(10) 0.0230(10) 0.0211(10) -0.0012(8) 0.0030(8) 0.0015(8) 
C2 0.0123(10) 0.0256(11) 0.0237(10) -0.0054(8) 0.0003(8) -0.0007(8) 
C3 0.0101(10) 0.0297(11) 0.0175(9) -0.0041(8) -0.0009(8) 0.0017(8) 
C4 0.0130(10) 0.0277(11) 0.0188(10) -0.0004(8) -0.0002(8) 0.0005(9) 
C5 0.0161(11) 0.0278(12) 0.0187(10) -0.0022(8) 0.0038(8) -0.0015(9) 
C6 0.0198(11) 0.0262(11) 0.0126(9) 0.0014(8) -0.0001(8) -0.0019(9) 
C7 0.0137(10) 0.0267(11) 0.0189(10) -0.0041(8) 0.0035(8) -0.0027(9) 
C8 0.0134(11) 0.0226(11) 0.0276(11) -0.0037(8) 0.0012(8) 0.0010(9) 
C9 0.0122(10) 0.0225(11) 0.0273(11) 0.0000(8) -0.0026(8) -0.0003(8) 
C10 0.0190(11) 0.0219(11) 0.0152(10) -0.0018(7) 0.0012(8) 0.0022(9) 
C11 0.0188(11) 0.0292(12) 0.0179(10) -0.0034(8) 0.0034(8) -0.0006(9) 
C12 0.0271(13) 0.0316(12) 0.0232(11) -0.0032(9) 0.0082(9) -0.0068(10) 
C13 0.0409(15) 0.0289(13) 0.0193(11) 0.0027(9) 0.0042(10) -0.0066(10) 
C14 0.0335(13) 0.0280(12) 0.0152(10) 0.0022(9) -0.0026(9) -0.0017(10) 
C15 0.0208(11) 0.0253(11) 0.0160(10) -0.0011(8) -0.0013(8) 0.0009(9) 
C16 0.0181(11) 0.0266(11) 0.0149(9) -0.0016(8) 0.0009(8) 0.0020(8) 
C17 0.0206(12) 0.0374(13) 0.0145(10) -0.0016(9) -0.0036(8) 0.0031(9) 
C18 0.0144(11) 0.0394(13) 0.0198(10) -0.0082(9) -0.0027(8) 0.0018(9) 
C19 0.0134(10) 0.0300(12) 0.0226(10) -0.0073(9) 0.0021(8) 0.0006(9) 
C20 0.0156(10) 0.0261(11) 0.0177(9) -0.0026(8) 0.0001(8) 0.0010(8) 
C21 0.0142(10) 0.0258(11) 0.0154(9) -0.0022(8) -0.0007(8) 0.0041(8) 
B1 0.0137(11) 0.0234(12) 0.0162(10) 0.0012(9) -0.0034(8) 0.0013(9) 
  
_geom_special_details 
; 
 All esds (except the esd in the dihedral angle between two l.s. planes) 
 are estimated using the full covariance matrix.  The cell esds are taken 
 into account individually in the estimation of esds in distances, angles 
 and torsion angles; correlations between esds in cell parameters are only 
 used when they are defined by crystal symmetry.  An approximate (isotropic) 
 treatment of cell esds is used for estimating esds involving l.s. planes. 
; 
  
loop_ 
 _geom_bond_atom_site_label_1 
 _geom_bond_atom_site_label_2 
 _geom_bond_distance 
 _geom_bond_site_symmetry_2 
 _geom_bond_publ_flag 
Ni1 C21 1.941(2) . ? 
Ni1 C10 1.946(2) . ? 
Ni1 N3 2.0052(18) . ? 
Ni1 N1 2.0141(18) . ? 
Ni1 N5 2.0216(19) . ? 
N1 C1 1.332(3) . ? 
N1 N2 1.369(2) . ? 
N2 C3 1.347(3) . ? 
N2 B1 1.543(3) . ? 
N3 C4 1.333(3) . ? 
N3 N4 1.365(2) . ? 
N4 C6 1.348(3) . ? 
N4 B1 1.536(3) . ? 
N5 C7 1.333(3) . ? 
N5 N6 1.366(2) . ? 
N6 C9 1.344(3) . ? 
N6 B1 1.542(3) . ? 
C1 C2 1.401(3) . ? 
C1 H1 0.9500 . ? 
C2 C3 1.383(3) . ? 
C2 H2 0.9500 . ? 
C3 H3 0.9500 . ? 
C4 C5 1.392(3) . ? 
C4 H4 0.9500 . ? 
C5 C6 1.376(3) . ? 
C5 H5 0.9500 . ? 
C6 H6 0.9500 . ? 
C7 C8 1.395(3) . ? 
C7 H7 0.9500 . ? 
C8 C9 1.378(3) . ? 
C8 H8 0.9500 . ? 
C9 H9 0.9500 . ? 
C10 C11 1.391(3) . ? 
C10 C15 1.408(3) . ? 
C11 C12 1.401(3) . ? 
C11 H11 0.9500 . ? 
C12 C13 1.383(4) . ? 
C12 H12 0.9500 . ? 
C13 C14 1.386(4) . ? 
C13 H13 0.9500 . ? 
C14 C15 1.394(3) . ? 
C14 H14 0.9500 . ? 
C15 C16 1.461(3) . ? 
C16 C17 1.396(3) . ? 
C16 C21 1.412(3) . ? 
C17 C18 1.391(4) . ? 
C17 H17 0.9500 . ? 
C18 C19 1.387(3) . ? 
C18 H18 0.9500 . ? 
C19 C20 1.400(3) . ? 
C19 H19 0.9500 . ? 
C20 C21 1.388(3) . ? 
C20 H20 0.9500 . ? 
B1 H1B 1.0000 . ? 
  
loop_ 
 _geom_angle_atom_site_label_1 
 _geom_angle_atom_site_label_2 
 _geom_angle_atom_site_label_3 
 _geom_angle 
 _geom_angle_site_symmetry_1 
 _geom_angle_site_symmetry_3 
 _geom_angle_publ_flag 
C21 Ni1 C10 81.89(9) . . ? 
C21 Ni1 N3 93.03(8) . . ? 
C10 Ni1 N3 165.39(8) . . ? 
C21 Ni1 N1 169.23(8) . . ? 
C10 Ni1 N1 95.44(8) . . ? 
N3 Ni1 N1 87.01(7) . . ? 
C21 Ni1 N5 101.32(8) . . ? 
C10 Ni1 N5 103.42(8) . . ? 
N3 Ni1 N5 90.98(7) . . ? 
N1 Ni1 N5 89.44(7) . . ? 
C1 N1 N2 106.81(17) . . ? 
C1 N1 Ni1 135.01(15) . . ? 
N2 N1 Ni1 117.86(13) . . ? 
C3 N2 N1 109.55(17) . . ? 
C3 N2 B1 131.07(18) . . ? 
N1 N2 B1 118.86(16) . . ? 
C4 N3 N4 106.77(17) . . ? 
C4 N3 Ni1 134.54(15) . . ? 
N4 N3 Ni1 117.87(13) . . ? 
C6 N4 N3 109.37(17) . . ? 
C6 N4 B1 130.38(18) . . ? 
N3 N4 B1 119.36(17) . . ? 
C7 N5 N6 106.85(17) . . ? 
C7 N5 Ni1 135.76(15) . . ? 
N6 N5 Ni1 117.23(13) . . ? 
C9 N6 N5 109.45(17) . . ? 
C9 N6 B1 130.78(18) . . ? 
N5 N6 B1 119.57(17) . . ? 
N1 C1 C2 110.38(19) . . ? 
N1 C1 H1 124.8 . . ? 
C2 C1 H1 124.8 . . ? 
C3 C2 C1 104.78(19) . . ? 
C3 C2 H2 127.6 . . ? 
C1 C2 H2 127.6 . . ? 
N2 C3 C2 108.49(19) . . ? 
N2 C3 H3 125.8 . . ? 
C2 C3 H3 125.8 . . ? 
N3 C4 C5 110.34(19) . . ? 
N3 C4 H4 124.8 . . ? 
C5 C4 H4 124.8 . . ? 
C6 C5 C4 105.01(19) . . ? 
C6 C5 H5 127.5 . . ? 
C4 C5 H5 127.5 . . ? 
N4 C6 C5 108.50(18) . . ? 
N4 C6 H6 125.8 . . ? 
C5 C6 H6 125.7 . . ? 
N5 C7 C8 110.14(19) . . ? 
N5 C7 H7 124.9 . . ? 
C8 C7 H7 124.9 . . ? 
C9 C8 C7 105.04(19) . . ? 
C9 C8 H8 127.5 . . ? 
C7 C8 H8 127.5 . . ? 
N6 C9 C8 108.52(19) . . ? 
N6 C9 H9 125.7 . . ? 
C8 C9 H9 125.7 . . ? 
C11 C10 C15 119.00(19) . . ? 
C11 C10 Ni1 126.15(16) . . ? 
C15 C10 Ni1 114.69(16) . . ? 
C10 C11 C12 120.0(2) . . ? 
C10 C11 H11 120.0 . . ? 
C12 C11 H11 120.0 . . ? 
C13 C12 C11 120.5(2) . . ? 
C13 C12 H12 119.7 . . ? 
C11 C12 H12 119.7 . . ? 
C12 C13 C14 120.1(2) . . ? 
C12 C13 H13 120.0 . . ? 
C14 C13 H13 120.0 . . ? 
C13 C14 C15 119.9(2) . . ? 
C13 C14 H14 120.1 . . ? 
C15 C14 H14 120.1 . . ? 
C14 C15 C10 120.4(2) . . ? 
C14 C15 C16 126.4(2) . . ? 
C10 C15 C16 112.96(19) . . ? 
C17 C16 C21 119.9(2) . . ? 
C17 C16 C15 127.5(2) . . ? 
C21 C16 C15 112.35(19) . . ? 
C18 C17 C16 119.9(2) . . ? 
C18 C17 H17 120.1 . . ? 
C16 C17 H17 120.1 . . ? 
C19 C18 C17 120.0(2) . . ? 
C19 C18 H18 120.0 . . ? 
C17 C18 H18 120.0 . . ? 
C18 C19 C20 120.5(2) . . ? 
C18 C19 H19 119.7 . . ? 
C20 C19 H19 119.7 . . ? 
C21 C20 C19 119.8(2) . . ? 
C21 C20 H20 120.1 . . ? 
C19 C20 H20 120.1 . . ? 
C20 C21 C16 119.56(19) . . ? 
C20 C21 Ni1 125.42(15) . . ? 
C16 C21 Ni1 115.00(16) . . ? 
N4 B1 N6 110.10(17) . . ? 
N4 B1 N2 105.79(17) . . ? 
N6 B1 N2 107.53(17) . . ? 
N4 B1 H1B 111.1 . . ? 
N6 B1 H1B 111.1 . . ? 
N2 B1 H1B 111.1 . . ? 
  
loop_ 
 _geom_torsion_atom_site_label_1 
 _geom_torsion_atom_site_label_2 
 _geom_torsion_atom_site_label_3 
 _geom_torsion_atom_site_label_4 
 _geom_torsion 
 _geom_torsion_site_symmetry_1 
 _geom_torsion_site_symmetry_2 
 _geom_torsion_site_symmetry_3 
 _geom_torsion_site_symmetry_4 
 _geom_torsion_publ_flag 
C1 N1 N2 C3 -0.2(2) . . . . ? 
Ni1 N1 N2 C3 -174.66(13) . . . . ? 
C1 N1 N2 B1 172.43(18) . . . . ? 
Ni1 N1 N2 B1 -2.0(2) . . . . ? 
C4 N3 N4 C6 -0.6(2) . . . . ? 
Ni1 N3 N4 C6 170.54(14) . . . . ? 
C4 N3 N4 B1 -170.84(19) . . . . ? 
Ni1 N3 N4 B1 0.3(2) . . . . ? 
C7 N5 N6 C9 0.7(2) . . . . ? 
Ni1 N5 N6 C9 -175.52(14) . . . . ? 
C7 N5 N6 B1 176.11(18) . . . . ? 
Ni1 N5 N6 B1 -0.1(2) . . . . ? 
N2 N1 C1 C2 0.5(2) . . . . ? 
Ni1 N1 C1 C2 173.54(15) . . . . ? 
N1 C1 C2 C3 -0.6(2) . . . . ? 
N1 N2 C3 C2 -0.2(2) . . . . ? 
B1 N2 C3 C2 -171.6(2) . . . . ? 
C1 C2 C3 N2 0.4(2) . . . . ? 
N4 N3 C4 C5 0.4(2) . . . . ? 
Ni1 N3 C4 C5 -168.62(16) . . . . ? 
N3 C4 C5 C6 0.0(3) . . . . ? 
N3 N4 C6 C5 0.6(2) . . . . ? 
B1 N4 C6 C5 169.4(2) . . . . ? 
C4 C5 C6 N4 -0.4(2) . . . . ? 
N6 N5 C7 C8 -0.5(2) . . . . ? 
Ni1 N5 C7 C8 174.68(16) . . . . ? 
N5 C7 C8 C9 0.1(2) . . . . ? 
N5 N6 C9 C8 -0.6(2) . . . . ? 
B1 N6 C9 C8 -175.3(2) . . . . ? 
C7 C8 C9 N6 0.3(2) . . . . ? 
C15 C10 C11 C12 3.2(3) . . . . ? 
Ni1 C10 C11 C12 -171.89(17) . . . . ? 
C10 C11 C12 C13 -1.0(4) . . . . ? 
C11 C12 C13 C14 -1.2(4) . . . . ? 
C12 C13 C14 C15 1.0(4) . . . . ? 
C13 C14 C15 C10 1.3(3) . . . . ? 
C13 C14 C15 C16 -173.6(2) . . . . ? 
C11 C10 C15 C14 -3.4(3) . . . . ? 
Ni1 C10 C15 C14 172.26(17) . . . . ? 
C11 C10 C15 C16 172.17(19) . . . . ? 
Ni1 C10 C15 C16 -12.2(2) . . . . ? 
C14 C15 C16 C17 0.2(4) . . . . ? 
C10 C15 C16 C17 -175.0(2) . . . . ? 
C14 C15 C16 C21 174.7(2) . . . . ? 
C10 C15 C16 C21 -0.5(3) . . . . ? 
C21 C16 C17 C18 -5.7(3) . . . . ? 
C15 C16 C17 C18 168.4(2) . . . . ? 
C16 C17 C18 C19 0.4(3) . . . . ? 
C17 C18 C19 C20 3.9(3) . . . . ? 
C18 C19 C20 C21 -2.7(3) . . . . ? 
C19 C20 C21 C16 -2.6(3) . . . . ? 
C19 C20 C21 Ni1 176.05(16) . . . . ? 
C17 C16 C21 C20 6.8(3) . . . . ? 
C15 C16 C21 C20 -168.18(19) . . . . ? 
C17 C16 C21 Ni1 -171.96(16) . . . . ? 
C15 C16 C21 Ni1 13.0(2) . . . . ? 
C6 N4 B1 N6 135.5(2) . . . . ? 
N3 N4 B1 N6 -56.6(2) . . . . ? 
C6 N4 B1 N2 -108.6(2) . . . . ? 
N3 N4 B1 N2 59.3(2) . . . . ? 
C9 N6 B1 N4 -129.4(2) . . . . ? 
N5 N6 B1 N4 56.4(2) . . . . ? 
C9 N6 B1 N2 115.8(2) . . . . ? 
N5 N6 B1 N2 -58.4(2) . . . . ? 
C3 N2 B1 N4 112.8(2) . . . . ? 
N1 N2 B1 N4 -58.0(2) . . . . ? 
C3 N2 B1 N6 -129.6(2) . . . . ? 
N1 N2 B1 N6 59.7(2) . . . . ? 
  
_refine_diff_density_max    0.466 
_refine_diff_density_min   -0.523 
_refine_diff_density_rms    0.094 
  
_shelxl_version_number 2014/6 
  
_shelx_res_file 
; 
TITL em334 in Pbca 
REM Pbca (#61, found as Pcab in ba-c setting) 
CELL 1.54184  14.979834  13.012814  19.595731  90.0000  90.0000  90.0000 
ZERR    8.00   0.000245   0.000225   0.000245   0.0000   0.0000   0.0000 
LATT  1 
SYMM -x+1/2,-y, z+1/2 
SYMM -x, y+1/2,-z+1/2 
SYMM  x+1/2,-y+1/2,-z 
SFAC C  H  B  N  Ni 
UNIT 168  144  8  48  8 
  
REM Old TITL em344 in Pbca 
REM SHELXT solution in Pbca 
REM R1 0.133,  Rweak 0.003,  Alpha 0.025,  Orientation as input 
REM Formula found by SHELXT:  C23 N5 Ni 
L.S. 10 
ACTA 
BOND $H 
FMAP 2 
PLAN 20 
conf 
htab 
SIZE 0.01 0.03 0.20 
TEMP -188 
WGHT    0.073400    3.023400 
EXTI    0.000362 
FVAR       2.25764 
NI1   5    0.716819    0.340818    0.667230    11.00000    0.01086    0.02261 = 
         0.01261    0.00068   -0.00124    0.00037 
N1    4    0.805735    0.413476    0.727362    11.00000    0.01382    0.02227 = 
         0.01553    0.00140   -0.00124    0.00135 
N2    4    0.837494    0.361906    0.783216    11.00000    0.01180    0.02567 = 
         0.01473    0.00061   -0.00203    0.00104 
N3    4    0.651362    0.303248    0.752933    11.00000    0.01225    0.02694 = 
         0.01403    0.00151   -0.00343    0.00050 
N4    4    0.699951    0.265113    0.806123    11.00000    0.01352    0.02511 = 
         0.01336    0.00084   -0.00216   -0.00014 
N5    4    0.791331    0.211620    0.673397    11.00000    0.01291    0.02366 = 
         0.01541    0.00206   -0.00219   -0.00115 
N6    4    0.823141    0.184973    0.736298    11.00000    0.01197    0.02364 = 
         0.01662   -0.00034   -0.00298    0.00091 
C1    1    0.838457    0.508528    0.730606    11.00000    0.01191    0.02298 = 
         0.02111   -0.00120    0.00297    0.00151 
AFIX  43 
H1    2    0.826745    0.561255    0.698293    11.00000   -1.20000 
AFIX   0 
C2    1    0.892591    0.519721    0.788427    11.00000    0.01226    0.02564 = 
         0.02369   -0.00539    0.00029   -0.00073 
AFIX  43 
H2    2    0.924309    0.579241    0.802574    11.00000   -1.20000 
AFIX   0 
C3    1    0.889672    0.425029    0.820362    11.00000    0.01010    0.02965 = 
         0.01752   -0.00415   -0.00086    0.00173 
AFIX  43 
H3    2    0.919434    0.407442    0.861548    11.00000   -1.20000 
AFIX   0 
C4    1    0.569098    0.319922    0.776412    11.00000    0.01298    0.02767 = 
         0.01882   -0.00035   -0.00025    0.00055 
AFIX  43 
H4    2    0.521035    0.346163    0.750016    11.00000   -1.20000 
AFIX   0 
C5    1    0.563645    0.293412    0.845106    11.00000    0.01610    0.02783 = 
         0.01869   -0.00218    0.00383   -0.00154 
AFIX  43 
H5    2    0.512872    0.297791    0.874010    11.00000   -1.20000 
AFIX   0 
C6    1    0.647792    0.259480    0.862050    11.00000    0.01985    0.02619 = 
         0.01256    0.00138   -0.00012   -0.00190 
AFIX  43 
H6    2    0.666041    0.236037    0.905792    11.00000   -1.20000 
AFIX   0 
C7    1    0.824479    0.143906    0.629090    11.00000    0.01374    0.02675 = 
         0.01886   -0.00410    0.00346   -0.00267 
AFIX  43 
H7    2    0.812822    0.143815    0.581436    11.00000   -1.20000 
AFIX   0 
C8    1    0.878780    0.073186    0.662861    11.00000    0.01343    0.02261 = 
         0.02763   -0.00370    0.00116    0.00098 
AFIX  43 
H8    2    0.910585    0.017188    0.643460    11.00000   -1.20000 
AFIX   0 
C9    1    0.876269    0.102183    0.730448    11.00000    0.01223    0.02251 = 
         0.02727   -0.00001   -0.00265   -0.00033 
AFIX  43 
H9    2    0.906926    0.069218    0.766805    11.00000   -1.20000 
AFIX   0 
C10   1    0.757020    0.404133    0.582669    11.00000    0.01899    0.02186 = 
         0.01518   -0.00177    0.00117    0.00222 
C11   1    0.840036    0.448830    0.571325    11.00000    0.01880    0.02919 = 
         0.01792   -0.00336    0.00342   -0.00056 
AFIX  43 
H11   2    0.885851    0.442550    0.604586    11.00000   -1.20000 
AFIX   0 
C12   1    0.856053    0.503121    0.510818    11.00000    0.02715    0.03157 = 
         0.02323   -0.00322    0.00816   -0.00677 
AFIX  43 
H12   2    0.912531    0.534471    0.503548    11.00000   -1.20000 
AFIX   0 
C13   1    0.790293    0.511445    0.461576    11.00000    0.04085    0.02893 = 
         0.01932    0.00272    0.00425   -0.00662 
AFIX  43 
H13   2    0.801365    0.549471    0.421067    11.00000   -1.20000 
AFIX   0 
C14   1    0.708266    0.464379    0.471259    11.00000    0.03347    0.02795 = 
         0.01520    0.00217   -0.00257   -0.00166 
AFIX  43 
H14   2    0.663450    0.469212    0.437108    11.00000   -1.20000 
AFIX   0 
C15   1    0.691639    0.409956    0.531173    11.00000    0.02080    0.02530 = 
         0.01597   -0.00108   -0.00126    0.00089 
C16   1    0.612579    0.348158    0.546156    11.00000    0.01808    0.02657 = 
         0.01489   -0.00162    0.00092    0.00196 
C17   1    0.538899    0.331110    0.504034    11.00000    0.02060    0.03744 = 
         0.01455   -0.00163   -0.00359    0.00314 
AFIX  43 
H17   2    0.531109    0.370880    0.463817    11.00000   -1.20000 
AFIX   0 
C18   1    0.476923    0.255781    0.521068    11.00000    0.01443    0.03943 = 
         0.01976   -0.00816   -0.00268    0.00179 
AFIX  43 
H18   2    0.426928    0.243780    0.492326    11.00000   -1.20000 
AFIX   0 
C19   1    0.488084    0.198166    0.580012    11.00000    0.01344    0.03003 = 
         0.02259   -0.00725    0.00209    0.00057 
AFIX  43 
H19   2    0.447661    0.143963    0.590004    11.00000   -1.20000 
AFIX   0 
C20   1    0.558466    0.219277    0.624901    11.00000    0.01562    0.02611 = 
         0.01769   -0.00258    0.00013    0.00102 
AFIX  43 
H20   2    0.564239    0.181531    0.666162    11.00000   -1.20000 
AFIX   0 
C21   1    0.619754    0.295530    0.608902    11.00000    0.01416    0.02579 = 
         0.01544   -0.00221   -0.00071    0.00411 
B1    3    0.801494    0.253166    0.798466    11.00000    0.01367    0.02340 = 
         0.01616    0.00120   -0.00344    0.00133 
AFIX  13 
H1B   2    0.828703    0.224621    0.841037    11.00000   -1.20000 
  
AFIX   0 
HKLF 4 
  
REM  em334 in Pbca 
REM R1 =  0.0450 for    3198 Fo > 4sig(Fo)  and  0.0501 for all    3559 data 
REM    263 parameters refined using      0 restraints 
  
END 
  
WGHT      0.0732      3.0198 
  
REM Instructions for potential hydrogen bonds 
EQIV $1 -x+3/2, y+1/2, z 
HTAB C1 N5_$1 
  
REM Highest difference peak  0.466,  deepest hole -0.523,  1-sigma level  0.094 
Q1    1   0.7252  0.2330  0.6718  11.00000  0.05    0.47 
Q2    1   0.6758  0.3176  0.7347  11.00000  0.05    0.46 
Q3    1   0.7195  0.3958  0.7328  11.00000  0.05    0.43 
Q4    1   0.8174  0.4682  0.6619  11.00000  0.05    0.43 
Q5    1   0.8157  0.3262  0.6684  11.00000  0.05    0.42 
Q6    1   0.7596  0.3412  0.7278  11.00000  0.05    0.40 
Q7    1   0.6835  0.3387  0.5988  11.00000  0.05    0.39 
Q8    1   0.7311  0.2825  0.7331  11.00000  0.05    0.39 
Q9    1   0.7180  0.2847  0.6005  11.00000  0.05    0.37 
Q10   1   0.7947  0.2680  0.6698  11.00000  0.05    0.35 
Q11   1   0.7480  0.3725  0.5973  11.00000  0.05    0.34 
Q12   1   0.7377  0.2403  0.5724  11.00000  0.05    0.33 
Q13   1   0.8113  0.3916  0.6564  11.00000  0.05    0.32 
Q14   1   0.7510  0.2614  0.7979  11.00000  0.05    0.32 
Q15   1   0.7292  0.4023  0.5590  11.00000  0.05    0.31 
Q16   1   0.7472  0.4162  0.7698  11.00000  0.05    0.31 
Q17   1   0.8617  0.3405  0.6694  11.00000  0.05    0.30 
Q18   1   0.6519  0.2882  0.6115  11.00000  0.05    0.30 
Q19   1   0.8489  0.2132  0.8586  11.00000  0.05    0.30 
Q20   1   0.7499  0.2602  0.6970  11.00000  0.05    0.30 
; 
_shelx_res_checksum    5138 
  
_shelx_hkl_file 
; 
   0   0  -1 372.302 187.137   4 
   0   0  -1 218.655 186.156   1 
   0   0   1 19.7460 104.782   1 
   0   0   1-77.5546 63.5994   4 
   0   0  -2 303576. 6453.58   4 
   0   0  -2 301324. 6651.55   1 
   0   0   3 68.1167 158.335   4 
   0   0  -3 196.765 273.955   1 
   0   0   3 19.1545 133.518   1 
   0   0  -3 14.3816 305.203   4 
   0   0   4 81750.3 5860.53   1 
   0   0  -4 93508.6 5527.83   4 
   0   0  -4 86523.7 4876.74   1 
   0   0  -5-66.8432 447.778   1 
   0   0   5 11.0678 101.882   1 
   0   0  -5 212.840 606.231   4 
   0   0  -6 110666. 8227.32   4 
   0   0  -6 101291. 6169.05   1 
   0   0   6 85396.1 7502.27   1 
   0   0  -7 456.637 895.616   4 
   0   0  -7-206.693 333.032   1 
   0   0  -8 196.931 469.663   1 
   0   0  -8-3.31172 369.615   4 
   0   0  -9-273.232 146.070   1 
   0   0  -9 257.056 560.647   4 
   0   0  10 30359.4 1197.19  14 
   0   0 -10 27531.7 4043.91   1 
   0   0  10 33731.8 1255.02   6 
   0   0  10 31906.9 1493.50  17 
   0   0 -10 28158.6 5859.76   4 
   0   0  11-43.8298 103.277  17 
   0   0 -11-363.257 463.552   4 
   0   0  11 125.193 86.4593  14 
   0   0  11 25.4716 42.5882   6 
   0   0  11-40.2354 65.1325  16 
   0   0  11-76.5469 25.2090  26 
   0   0  11 88.8695 138.395  24 
   0   0 -11 339.511 627.127   1 
   0   0  11 80.4179 140.560  25 
   0   0 -12 61886.4 3116.68  12 
   0   0  12 71634.9 2495.54  17 
   0   0  12 65181.2 2503.89  24 
   0   0 -12 62189.7 6711.42   1 
   0   0  12 71407.2 3039.82  16 
   0   0  12 74431.9 2083.61   6 
   0   0  12 76142.6 2312.24  26 
   0   0  12 67799.9 2002.75  14 
   0   0 -12 68794.0 9661.23   4 
   0   0  12 66365.5 2519.35  25 
   0   0 -13 90.2562 66.5753  12 
   0   0  13 94.0422 97.3895  24 
   0   0  13 96.6920 142.343  16 
   0   0  13 53.2427 34.0357   6 
   0   0  13-25.7605 141.238  17 
   0   0  13-12.4360 84.5824  26 
   0   0  13-25.8390 149.940  25 
   0   0  13 151.034 129.113  14 
   0   0  14 9499.39 885.524  26 
   0   0 -14 7284.14 1131.70  12 
   0   0  14 8057.56 1143.86  16 
   0   0 -14 5766.02 2373.49   1 
   0   0  14 9704.30 822.048   6 
   0   0  14 8674.48 962.121  25 
   0   0  14 8770.42 968.682  24 
   0   0  14 8590.19 787.020  14 
   0   0  14 9414.10 980.678  17 
   0   0  15-57.8644 113.566  14 
   0   0  15-131.524 133.101  24 
   0   0 -15 279.537 199.899  12 
   0   0  15 56.7275 139.629  26 
   0   0  15 61.0690 61.9891  16 
   0   0  15 6.54227 69.1914  25 
   0   0  15-19.7606 136.856   6 
   0   0  15 98.3460 54.8499  17 
   0   0  16 23789.6 1657.91  25 
   0   0  16 23411.2 1706.98  17 
   0   0  16 25588.5 1473.73  14 
   0   0  16 26542.5 1493.91   6 
   0   0  16 25916.1 2081.70  16 
   0   0  16 23482.9 1665.83  24 
   0   0  17-49.5898 95.3489  24 
   0   0  17 245.086 258.443  17 
   0   0  17-115.049 137.545   6 
   0   0  17 187.892 186.031  25 
   0   0  17 142.248 140.613  14 
   0   0  17-41.6426 80.3273  15 
   0   0  17-17.3333 86.8523  16 
   0   0  18 20463.1 1881.64  16 
   0   0  18 19853.4 1603.75  17 
   0   0  18 21559.8 1402.41  14 
   0   0  18 18601.7 1421.90  25 
   0   0  18 21258.2 1270.78  15 
   0   0  18 22229.8 1411.92   6 
   0   0  18 18673.3 1424.58  24 
   0   0  19 15.9817 166.030  16 
   0   0  19-79.6666 65.2424  14 
   0   0  19-50.1450 71.5430   6 
   0   0  19 22.1458 146.974  17 
   0   0  20 48990.4 2031.42  14 
   0   0  20 43258.7 2562.00  16 
   0   0  20 42242.3 2202.08  17 
   0   0  21-44.2484 16.9628  21 
   0   0 -21 190.555 155.350  10 
   0   0  21 44.4811 109.550  16 
   0   0  21 112.099 118.273  14 
   0   0  21 116.831 178.656  17 
   0   0  22 70.7386 55.9052  17 
   0   0  22 102.760 39.8432  14 
   0   0  22 36.6614 77.8795  21 
   0   0 -22 80.8250 88.0910  10 
   0   0  22 52.6853 20.7528  16 
   0   0 -23 11.1948 110.316  10 
   0   0  23 74.7960 96.5824  16 
   0   0  23 29.2306 43.3597  14 
   0   0  23-113.619 148.982  21 
   1   0   0 122.272 218.964   4 
  -1   0   0 5.33943 14.2696   1 
   1   0   0 55.3244 48.4503   1 
  -1   0  -1 108.258 218.501   4 
   1   0   1 33.5806 8.74864   1 
  -1   0   1 8.18937 30.9671   5 
  -1   0   1 21.8957 68.8863   2 
   1   0  -1 16.2533 31.4673   5 
   1   0  -1 15.0019 35.8710   3 
   1   0  -1 26.1954 28.4105   1 
  -1   0   1 21.9880 115.873   3 
   1   0  -1 65.5335 95.4816   2 
  -1   0  -1 5.10137 31.6308   1 
   1   0   1-179.229 297.885   4 
  -1   0   1-151.847 131.089   1 
   1   0  -2 242159. 6633.78   1 
  -1   0   2 335954. 5971.58   2 
  -1   0  -2 287007. 6220.18   1 
   1   0  -2 284871. 5660.93   3 
   1   0   2 289992. 9023.13   4 
  -1   0   2 301052. 6347.03   1 
   1   0   2 262197. 6670.80   1 
   1   0  -2 298360. 5695.40   2 
  -1   0  -2 318461. 9964.13   4 
  -1   0   2 310530. 5821.57   3 
   1   0   3-27.5281 130.201   4 
  -1   0  -3-402.443 430.049   4 
   1   0  -3-27.4450 102.212   2 
   1   0   3 312.501 344.848   1 
   1   0  -3-24.4023 143.246   1 
  -1   0  -3 68.4907 192.053   1 
   1   0  -3 28.3336 98.4364   3 
  -1   0   3 24.9075 78.6660   1 
   1   0   4 4216.46 1393.26   1 
   1   0  -4 6600.66 1229.75   2 
  -1   0   4 5363.51 1484.39   1 
   1   0  -4 4781.70 1321.42   1 
  -1   0  -4 6190.97 1808.58   4 
   1   0  -4 6515.23 1201.19   3 
  -1   0  -4 6598.47 1325.04   1 
   1   0  -4 6454.44 1095.31   4 
   1   0   4 6009.23 1386.69   4 
  -1   0  -5 51.1926 444.351   1 
   1   0  -5-104.417 353.730   1 
  -1   0  -5 300.326 486.678   4 
   1   0   5-5.32384 214.320   4 
   1   0  -5-46.8373 256.692   4 
   1   0  -5-58.2913 185.434   2 
   1   0   5 117.608 472.490   1 
  -1   0   5-182.941 361.801   1 
   1   0  -5 176.039 277.525   3 
   1   0  -6 18545.9 2744.48   1 
  -1   0  -6 23331.0 4228.35   4 
   1   0  -6 19820.7 2738.13   4 
  -1   0  -6 23132.5 2959.44   1 
  -1   0   6 17361.0 3360.98   1 
   1   0   6 18732.3 2936.83   4 
   1   0  -7 142.995 235.366   1 
  -1   0  -7 894.888 1373.94   4 
  -1   0  -7 181.568 259.496   1 
   1   0   7 50.3406 381.500   4 
   1   0  -7 247.669 374.948   4 
   1   0  -8 33107.2 4893.41   4 
  -1   0  -8 41197.3 6587.12   4 
  -1   0  -8 40942.7 4544.93   1 
   1   0  -8 37657.1 4405.67   1 
  -1   0  -9-84.9108 208.637   1 
  -1   0  -9 235.575 326.245   4 
   1   0  -9 133.277 431.584   4 
   1   0  -9 696.415 789.070   1 
  -1   0 -10 64520.9 9213.03   4 
  -1   0  10 65194.6 2153.84  17 
   1   0 -10 49041.3 5328.73   1 
   1   0  10 64924.9 2097.92  17 
  -1   0 -10 56349.5 5873.16   1 
  -1   0  10 56098.2 1631.13  14 
   1   0  10 61255.5 2528.00  16 
   1   0  10 55201.2 1634.76  14 
   1   0 -10 45584.2 6695.70   4 
   1   0  10 62636.9 1721.92   6 
  -1   0  10 65877.7 2024.58  26 
  -1   0  10 62982.1 1709.66   6 
  -1   0  11 22.5200 54.0050   6 
   1   0  11 66.4593 136.207  16 
   1   0 -11 121.424 508.414   4 
  -1   0  11 76.8641 34.8490  24 
   1   0  11-1.38992 63.7901   6 
  -1   0  11-68.9438 118.556  17 
  -1   0 -11 56.5171 185.480  12 
  -1   0 -11-485.308 1006.31   4 
  -1   0  11 106.857 105.428  26 
  -1   0  11 88.7623 69.3592  25 
  -1   0 -11 173.174 298.379   1 
   1   0  11-32.5567 19.5881  14 
   1   0 -11 207.397 54.3771   1 
   1   0  11 31.3019 82.1618  17 
   1   0  11 117.396 148.141  26 
  -1   0  11 100.252 91.4875  14 
   1   0  12 13063.7 1066.84  24 
  -1   0 -12 12594.1 1421.72  12 
  -1   0 -12 12918.5 3099.29   1 
  -1   0  12 15460.2 1074.43  26 
  -1   0  12 14770.6 927.008   6 
   1   0  12 12416.0 847.835   9 
  -1   0 -12 15992.4 4955.64   4 
  -1   0  12 13142.2 1164.62  25 
   1   0 -12 11649.6 1433.58  12 
   1   0 -12 11973.0 2920.48   1 
   1   0  12 13493.1 889.338  14 
  -1   0  12 14878.8 1145.47  17 
  -1   0  12 13207.9 1172.49  24 
   1   0  12 13086.4 1058.17  25 
   1   0  12 15532.6 1133.94  17 
   1   0  12 15547.4 1038.18  26 
  -1   0  12 13724.7 1368.64  16 
   1   0  12 14525.0 929.094   6 
   1   0  12 13949.0 1347.01  16 
  -1   0  12 11172.1 808.791  14 
   1   0  13-171.907 76.1342  25 
  -1   0  13-104.565 148.235  16 
  -1   0  13 57.7882 135.300  24 
   1   0  13-29.0226 105.386   9 
   1   0  13 54.9033 187.478  16 
  -1   0  13 30.0139 40.8511  17 
  -1   0 -13-18.7164 442.060   1 
  -1   0  13 36.2007 148.440  26 
   1   0  13-95.7136 123.188  14 
  -1   0  13-71.3323 91.6135  14 
   1   0  13-99.8591 62.7575  26 
   1   0 -13-42.5166 319.558   1 
  -1   0  13 86.7298 76.6806   6 
  -1   0 -13-128.767 156.944  12 
   1   0  13-28.5099 33.6154  24 
   1   0  13-72.2095 96.2570   6 
   1   0  13-158.670 78.1577  17 
  -1   0  13 88.9589 122.363  25 
   1   0 -13 213.837 255.706  12 
   1   0  14 142034. 3736.79  24 
   1   0  14 143128. 3741.36  25 
  -1   0 -14 130962. 4593.44  12 
   1   0  14 145192. 4711.77  16 
  -1   0  14 141933. 4129.83  24 
   1   0  14 156235. 3384.31   6 
   1   0  14 150875. 3934.41  17 
   1   0  14 144833. 3246.36  14 
   1   0 -14 124364. 4803.64  12 
   1   0  14 143385. 3120.74   9 
  -1   0  14 146713. 3932.36  17 
  -1   0 -14 122443. 10580.7   1 
  -1   0  14 141566. 4113.38  25 
  -1   0  14 139517. 4780.66  16 
  -1   0  14 158242. 3373.52   6 
  -1   0  14 143538. 3252.40  14 
  -1   0  14 151922. 3707.79  26 
   1   0 -14 110719. 9391.42   1 
   1   0  15 139.725 205.003  17 
   1   0 -15 144.405 227.106  12 
  -1   0  15 166.545 168.767  25 
  -1   0  15 170.843 70.7304  16 
   1   0  15-42.0087 104.281  25 
  -1   0  15 199.737 191.076  24 
  -1   0  15 43.5455 75.6424   6 
   1   0  15 188.533 157.036   6 
   1   0  15 255.495 251.508  16 
  -1   0  15-33.3416 83.0314  26 
  -1   0  15-22.2990 82.0465  17 
  -1   0  15 177.304 95.9656  14 
   1   0  15 66.3431 65.9249  14 
   1   0  15 90.8421 111.963  24 
  -1   0 -15-49.8817 64.7348  12 
   1   0  16 119565. 3158.91   6 
  -1   0  16 107727. 3607.90  17 
   1   0  16 111370. 3062.85  14 
  -1   0  16 114730. 3363.03  26 
   1   0  16 112672. 4313.81  16 
  -1   0  16 113046. 4373.01  16 
  -1   0  16 118900. 3153.08   6 
  -1   0  16 107025. 3694.98  25 
  -1   0  16 113808. 3114.02  14 
   1   0  16 103889. 3232.14  25 
  -1   0  16 106980. 3699.90  24 
   1   0  16 103773. 3246.06  24 
   1   0  16 114536. 3636.39  17 
   1   0  17 57.3225 56.8961  14 
   1   0  17-4.11072 205.590  17 
  -1   0  17 84.9950 157.466  24 
  -1   0  17 107.826 60.1737   6 
  -1   0  17 232.117 205.646  14 
  -1   0  17-47.4679 109.511  25 
   1   0  17 121.543 181.118  15 
   1   0  17-83.9563 226.984  16 
  -1   0  17 162.151 232.643  17 
   1   0  17 63.6391 94.7330   6 
  -1   0  17 143.347 226.252  16 
  -1   0  18 32474.5 1962.86  24 
   1   0  18 35853.1 1798.15  14 
   1   0  18 34645.3 2405.03  16 
  -1   0  18 37892.8 1832.38   6 
   1   0  18 35129.5 1725.00  15 
   1   0  18 33388.7 2043.60  17 
  -1   0  18 35430.5 1831.53  14 
  -1   0  18 32597.7 1966.24  25 
  -1   0  18 35973.2 2082.36  17 
   1   0  18 38269.0 1824.63   6 
  -1   0  18 33380.3 2436.57  16 
   1   0  19-204.168 232.676  17 
   1   0  19-59.0111 90.7057  15 
   1   0  19 140.193 184.359  16 
  -1   0  19 162.138 99.2720  16 
  -1   0  19 60.1556 58.5178  14 
  -1   0  19-131.670 186.713  25 
   1   0  19 87.0760 74.2760   6 
  -1   0  19 103.180 111.900   6 
   1   0  19 64.3860 108.263  14 
  -1   0  19-147.214 145.599  24 
  -1   0  19 100.992 37.6887  17 
  -1   0  20 13901.4 1093.29  14 
   1   0  20 11859.4 932.126  15 
  -1   0  20 11824.8 1337.30  16 
  -1   0  20 13021.5 1188.18  17 
  -1   0  20 12807.3 1333.73  21 
  -1   0  20 11027.5 1003.94  24 
  -1   0  20 11479.7 1024.17  25 
   1   0  20 13145.9 1197.91  17 
  -1   0 -20 9871.51 1177.17  10 
   1   0  20 13582.1 1070.81  14 
   1   0  20 12387.2 1366.06  16 
  -1   0  21-66.4424 131.605  16 
   1   0  21 34.1455 126.949  14 
  -1   0  21 41.0908 62.7522  17 
   1   0  21 85.0749 106.234  16 
   1   0  21-256.779 172.275  21 
  -1   0 -21 170.854 118.941  10 
  -1   0  21 137.920 233.551  21 
   1   0  21 88.5302 142.709  17 
  -1   0  21-45.1672 93.0831  14 
  -1   0  22 14417.4 1213.13  21 
   1   0 -22 7812.22 974.215  10 
   1   0  22 11960.9 1125.13  16 
  -1   0 -22 9072.96 957.450  10 
  -1   0  22 15607.0 1014.99  14 
  -1   0  22 11819.1 1010.30  17 
   1   0  22 14270.7 1241.69  21 
   1   0  22 14797.4 979.912  14 
  -1   0  22 12371.5 1162.17  16 
   1   0  23-74.5331 73.6092  16 
  -1   0  23 157.659 99.0134  16 
  -1   0 -23-87.3181 74.3861  10 
  -1   0  23-84.0743 104.360  14 
   1   0  23 66.7604 39.8521  21 
   1   0  23-9.05179 26.2496  14 
   1   0 -23 213.887 148.615  10 
  -1   0  23-34.4083 41.3511  21 
   2   0   0 642372. 6004.63   1 
   2   0   0 873926. 15775.6   4 
  -2   0  -1-10.5458 218.424   4 
   2   0  -1 41.5953 46.3110   1 
   2   0  -1 124.069 103.848   1 
   2   0   1 96.0718 380.643   4 
  -2   0   1 81.2054 161.196   2 
  -2   0   1 35.4829 127.812   3 
   2   0   1 99.6415 133.938   1 
  -2   0  -1-3.88239 59.0407   1 
  -2   0   2 197189. 4107.79   1 
   2   0   2 212163. 6386.02   1 
   2   0   2 197194. 9397.97   4 
  -2   0  -2 195188. 5166.76   1 
   2   0  -2 192972. 3670.00   5 
  -2   0   2 185146. 5320.72   2 
   2   0  -2 217779. 5146.97   1 
   2   0  -2 181556. 5461.86   2 
   2   0  -2 175328. 5502.33   3 
  -2   0   2 184631. 5439.31   3 
  -2   0  -3 135.948 245.227   1 
   2   0  -3-7.64427 24.3761   3 
   2   0   3-96.6692 455.826   4 
   2   0   3 139.076 410.591   1 
  -2   0   3 1.12497 69.9007   5 
  -2   0   3 87.4729 177.907   2 
  -2   0   3 73.6466 24.7702   3 
   2   0  -3-20.7282 128.169   1 
   2   0  -3 31.4025 202.682   2 
  -2   0   3 44.5177 66.4723   1 
  -2   0  -3 92.4229 803.458   4 
   2   0   4 192.635 307.486   1 
  -2   0   4 343.101 308.764   1 
  -2   0  -4-39.8147 346.212   1 
  -2   0  -4 401.091 882.694   4 
   2   0  -4 381.063 348.077   3 
  -2   0   4 460.663 204.841   5 
   2   0  -4 257.063 367.903   2 
   2   0   4 243.829 336.842   4 
   2   0  -4 224.139 141.680   1 
   2   0   5-15.9064 105.142   1 
  -2   0  -5 259.176 404.335   1 
  -2   0  -5-200.741 815.386   4 
  -2   0   5-354.846 444.277   1 
  -2   0   5-0.34614 108.287   5 
   2   0  -5-96.6822 221.514   2 
   2   0  -5-7.69277 149.708   3 
   2   0  -5-105.324 122.652   1 
   2   0   5-80.5539 464.773   4 
   2   0   6 24036.7 3998.07   4 
   2   0  -6 30188.1 2924.43   4 
  -2   0  -6 32108.9 3495.97   1 
  -2   0   6 23690.9 3649.04   1 
  -2   0  -6 37881.6 5828.31   4 
   2   0  -6 25130.2 3181.06   1 
   2   0  -7 131.171 251.525   1 
  -2   0  -7-61.9738 687.695   4 
  -2   0  -7 245.106 293.217   1 
  -2   0   7 522.718 602.835   1 
   2   0  -7-7.19989 209.167   4 
  -2   0  -8 121039. 11825.0   4 
   2   0  -8 68061.8 5869.27   4 
  -2   0  -8 106414. 7229.07   1 
   2   0  -8 86919.8 6514.48   1 
  -2   0  -9 312.695 428.072   1 
   2   0  -9 130.664 287.262   4 
   2   0  -9-77.2756 141.283   1 
  -2   0  -9-107.549 802.479   4 
  -2   0  10 34910.3 1573.26  26 
  -2   0  10 30301.4 1721.75  24 
  -2   0  10 34636.5 1270.77   6 
  -2   0  10 30278.7 1727.07  25 
   2   0  10 33767.6 1833.45  16 
  -2   0  10 30741.1 1205.99  14 
  -2   0 -10 31106.9 4384.77   1 
  -2   0 -10 35721.6 7132.09   4 
   2   0  10 30586.5 1215.68  14 
   2   0 -10 27854.5 3967.33   1 
   2   0  10 34157.6 1532.65  17 
   2   0  10 34330.9 1282.32   6 
  -2   0  10 33408.1 1607.09  17 
  -2   0  11 75.1487 170.327  17 
  -2   0  11 17.5987 44.2508   6 
  -2   0 -11-13.1114 32.1614  23 
  -2   0  11 75.2091 50.0939  25 
   2   0  11-92.1821 102.644  17 
   2   0  11 31.5726 93.9684  16 
   2   0 -11-69.5236 253.547   1 
   2   0  11 92.7651 73.6163   9 
  -2   0 -11 133.767 97.4432  12 
  -2   0  11 53.9063 78.9334  24 
  -2   0  11 13.2156 71.9059  14 
  -2   0  11 216.029 209.278  26 
   2   0  11 70.3386 37.4744   6 
   2   0  11-10.1047 30.4910  14 
  -2   0  12 25518.4 1704.92  24 
   2   0  12 26274.3 1867.29  16 
   2   0  12 26919.7 1246.71  14 
  -2   0  12 26997.4 1912.32  16 
   2   0 -12 22579.0 2007.82  12 
  -2   0 -12 34808.1 7622.33   4 
  -2   0  12 25965.6 1553.87  17 
  -2   0 -12 24640.7 4417.48   1 
  -2   0  12 28369.5 1289.96   6 
   2   0  12 27351.4 1290.38   9 
  -2   0 -12 24635.3 1583.04  23 
  -2   0  12 25111.2 1705.52  25 
  -2   0  12 26297.9 1266.04  14 
   2   0 -12 20286.9 3729.64   1 
  -2   0 -12 26024.9 1830.63  12 
  -2   0  12 29675.5 1564.68  26 
   2   0  12 28578.3 1292.32   6 
   2   0  12 28403.2 1536.18  17 
   2   0  13 206.998 147.863   9 
   2   0 -13-202.435 155.827  12 
   2   0 -13-250.081 512.700   1 
  -2   0 -13 284.127 584.836   1 
  -2   0  13 8.33362 145.453  17 
  -2   0 -13 63.4628 45.8349  23 
  -2   0  13 106.418 116.518  26 
   2   0  13 42.4084 99.3228  14 
  -2   0 -13 89.0912 231.239  12 
   2   0  13 3.47569 140.506  16 
  -2   0  13-16.7259 71.2417   6 
   2   0  13 108.765 116.159   6 
  -2   0  13 119.765 193.610  24 
   2   0  13 69.6293 125.986  17 
  -2   0  13 39.6417 82.1867  14 
  -2   0  13 130.332 201.203  25 
  -2   0  13 24.6346 147.139  16 
   2   0  14 45129.9 1824.03   6 
   2   0  14 43677.9 1776.93   9 
  -2   0  14 46759.0 1823.24   6 
  -2   0  14 46175.1 2239.38  17 
  -2   0  14 42751.5 2362.46  25 
  -2   0  14 43629.8 1787.46  14 
   2   0  14 43946.1 1771.54  14 
   2   0 -14 37347.1 2709.83  12 
  -2   0 -14 47585.9 2181.77  23 
  -2   0  14 46150.4 2055.91  26 
  -2   0 -14 38546.3 2319.88  12 
  -2   0  14 40099.9 2626.89  16 
   2   0  14 46493.5 2143.15  17 
   2   0  14 42980.7 2539.92  16 
  -2   0  14 43344.0 2386.60  24 
  -2   0  15 3.66794 64.6539  16 
  -2   0 -15-95.8421 152.338  12 
   2   0  15-15.8628 43.2125   6 
   2   0  15 49.7067 64.5848  14 
  -2   0  15 81.3769 163.428  17 
  -2   0  15-56.3093 46.8163  26 
   2   0  15 81.9634 116.367  17 
   2   0  15 133.210 43.8854   9 
   2   0  15-78.6177 107.089  16 
  -2   0  15 25.6201 58.0771   6 
   2   0 -15-312.580 244.643  12 
  -2   0  15-80.2497 149.026  14 
  -2   0  15-58.1026 138.158  25 
  -2   0  15 107.997 77.6584  24 
  -2   0 -16 9326.11 1157.04  12 
  -2   0  16 12272.7 1275.17  17 
   2   0  16 11711.1 983.678   9 
  -2   0  16 13649.6 1059.97   6 
   2   0  16 14238.6 1069.51   6 
   2   0  16 11914.8 1207.13  17 
  -2   0  16 13087.9 1149.46  26 
   2   0  16 12548.9 1022.51  14 
  -2   0  16 12139.7 1285.52  24 
  -2   0  16 12321.4 1289.94  25 
   2   0  16 12172.9 1407.57  16 
  -2   0  16 13219.1 1052.85  14 
  -2   0  16 12621.7 1486.72  16 
   2   0  17 175.158 225.209  17 
  -2   0  17 17.0790 73.8517  26 
   2   0  17 27.9836 150.140   6 
   2   0  17 211.860 226.934  16 
   2   0  17 6.96605 74.9830  14 
  -2   0  17 71.3402 151.671   6 
  -2   0  17-3.31901 30.2390  17 
  -2   0  17 115.775 92.2168  24 
  -2   0  17 119.691 114.383  16 
  -2   0  17-29.4518 118.358  14 
  -2   0  17-164.910 62.6213  25 
  -2   0  18 4118.46 625.138  14 
  -2   0  18 3770.00 677.561  25 
  -2   0 -18 3358.09 678.050  10 
   2   0  18 4359.73 712.956  17 
   2   0  18 4617.78 629.276   6 
  -2   0  18 3348.11 792.357  16 
   2   0  18 4388.77 620.514  14 
  -2   0  18 4500.76 622.528   6 
   2   0  18 3361.28 732.619  16 
   2   0  18 4040.01 567.666  15 
  -2   0  18 3411.60 670.247  24 
  -2   0  18 3982.68 709.287  17 
   2   0  19-40.8134 158.307  16 
  -2   0 -19 269.590 219.886  10 
   2   0  19-78.3066 77.3563  17 
  -2   0  19 57.6601 163.068  16 
   2   0  19 70.1769 140.382  15 
  -2   0  19-148.952 113.599  14 
  -2   0  19 159.738 209.322  24 
   2   0  19 152.172 147.588  14 
  -2   0  19 186.221 200.034  17 
  -2   0  19 178.697 224.756  25 
   2   0  20 14008.9 1064.56  14 
  -2   0  20 13529.3 1067.53  14 
  -2   0 -20 9280.35 1141.96  10 
   2   0  20 12138.2 1305.87  16 
  -2   0  20 11763.3 1094.32  24 
  -2   0  20 11554.8 1083.62  25 
   2   0  20 13537.2 960.845  15 
  -2   0  20 11318.1 1325.22  16 
   2   0  20 12536.6 1152.29  17 
  -2   0  20 12514.5 1323.80  21 
  -2   0  20 11452.3 1154.06  17 
  -2   0  21 35.0647 66.2226  24 
   2   0  21 2.74294 95.1057  15 
   2   0  21 8.22241 93.3164  14 
   2   0  21-90.4364 126.784  21 
  -2   0  21 87.4411 57.5559  16 
  -2   0  21-131.625 13.9909  14 
  -2   0  21 44.3162 112.971  17 
  -2   0 -21-1.64183 149.520  10 
  -2   0  21 21.1980 58.8095  25 
   2   0  21 116.536 169.615  16 
  -2   0  21-231.796 148.809  21 
  -2   0  22 799.585 263.871  21 
  -2   0  22 638.455 269.012  16 
   2   0  22 612.489 254.811  16 
  -2   0  22 934.253 254.958  14 
  -2   0  22 849.725 271.847  17 
  -2   0 -22 537.181 272.245  10 
   2   0  22 1015.16 326.671  21 
   2   0 -22 562.838 262.795  10 
   2   0  22 737.832 228.782  14 
   2   0  23-72.9214 28.1303  21 
   2   0  23-4.30603 48.8693  16 
   2   0  23 74.7655 74.2864  14 
  -2   0  23-167.260 85.3930  21 
  -2   0  23-28.1517 73.6003  14 
  -2   0  23-51.6680 95.1996  16 
  -2   0 -23 29.6647 65.9063  10 
   2   0 -23 53.2978 82.3639  10 
   3   0   0 33.9117 235.681   4 
  -3   0   0 68.0503 40.5762   1 
   3   0   0 17.9987 84.4034   1 
   3   0   1-148.625 252.147   4 
   3   0  -1 83.8787 131.630   1 
  -3   0   1 56.9950 97.4741   2 
  -3   0  -1 58.9641 114.440   1 
   3   0  -1 31.7262 70.6674   1 
   3   0   1 92.7928 152.613   1 
  -3   0   1-124.193 282.034   3 
   3   0  -2 99409.4 3638.56   5 
   3   0  -2 92598.9 4640.13   3 
  -3   0   2 101022. 4593.55   2 
   3   0  -2 110006. 3546.96   1 
  -3   0  -2 102994. 3886.78   1 
   3   0  -2 103656. 2149.17   1 
   3   0  -2 93427.0 4597.65   2 
   3   0   2 111095. 8189.80   4 
  -3   0   2 99665.3 4684.48   3 
   3   0   2 101228. 4761.86   1 
  -3   0  -3 57.6930 84.3078   1 
  -3   0   3 31.1121 141.866   2 
  -3   0   3-114.475 113.180   3 
   3   0   3 2.62150 312.782   4 
   3   0  -3 105.759 103.818   3 
   3   0   3 123.276 322.128   1 
   3   0  -3 115.586 279.112   1 
   3   0  -3 38.1380 67.1827   5 
  -3   0  -3-269.685 738.257   4 
  -3   0   3 174.545 183.978   1 
   3   0  -3 14.6322 87.9815   2 
  -3   0  -4 273656. 8457.60   1 
   3   0  -4 213818. 8001.80   2 
  -3   0   4 239771. 8051.57   2 
   3   0  -4 157750. 6964.72   1 
  -3   0  -4 301003. 15333.4   4 
   3   0  -4 205732. 8011.22   3 
  -3   0   4 232478. 8040.76   3 
   3   0   4 174654. 11330.5   4 
   3   0   4 213659. 9762.86   1 
  -3   0   4 212438. 6353.43   1 
  -3   0  -5 439.199 1004.30   4 
   3   0  -5 261.734 186.767   1 
  -3   0   5 85.6919 72.0044   1 
  -3   0  -5-32.5149 247.383   1 
  -3   0   6 2696.06 1010.98   1 
   3   0  -6 2319.24 1104.00   1 
  -3   0  -6 3987.84 1935.52   4 
  -3   0   6 2286.43 512.600   5 
  -3   0  -6 3839.14 1255.32   1 
  -3   0  -7 313.739 973.699   4 
  -3   0  -7 21.5438 26.4226   1 
   3   0  -7-136.423 380.303   4 
  -3   0   7-74.5445 81.0799   5 
  -3   0   7-242.537 377.873   1 
   3   0  -7 64.6611 263.726   1 
  -3   0   8 3889.53 637.069   5 
   3   0  -8 5672.92 1704.68   1 
   3   0  -8 4119.05 1178.00   4 
  -3   0  -8 7393.54 1807.94   1 
   3   0  -9 11.1938 279.040   1 
  -3   0  -9 574.455 1609.51   4 
  -3   0   9 140.030 116.694  26 
  -3   0   9-120.756 100.706  24 
  -3   0   9-116.552 110.016  25 
   3   0  -9 74.0661 343.836   4 
  -3   0  -9 228.151 398.530   1 
  -3   0   9-33.2296 79.7857   5 
   3   0 -10 78778.0 6531.01   1 
   3   0  10 101493. 3159.67  16 
  -3   0  10 99472.6 2151.03   6 
  -3   0 -10 95794.6 2949.38  23 
  -3   0  10 93395.3 2129.14  14 
   3   0  10 94400.4 2394.79   9 
  -3   0 -10 119310. 13793.3   4 
  -3   0  10 90008.3 3078.97  25 
  -3   0  10 98839.6 2848.31  26 
  -3   0  10 99998.9 2866.47  17 
   3   0  10 101921. 2591.91  17 
   3   0  10 101175. 2223.34   6 
  -3   0 -10 91425.6 7646.30   1 
   3   0  10 95386.1 2138.08  14 
  -3   0  10 90861.1 3088.37  24 
  -3   0  11-195.967 120.513  17 
   3   0  11 133.880 78.8318  17 
   3   0  11 5.72911 57.0673   6 
  -3   0  11-55.5527 80.0527   6 
  -3   0  11-71.5134 124.036  24 
   3   0  11 18.0854 71.5335   9 
  -3   0  11-176.546 146.454  26 
   3   0 -11 304.784 321.959   1 
  -3   0 -11 47.2951 1027.63   4 
  -3   0  11 134.752 75.1666  25 
  -3   0 -11 9.29700 84.0618  23 
   3   0  11 20.9344 81.0164  14 
  -3   0  11 14.9735 50.6612  14 
  -3   0 -11 33.2641 139.977  12 
  -3   0 -11-192.245 72.7260   1 
   3   0  11-63.3281 42.8690  16 
   3   0  12 13908.8 972.759   9 
   3   0  12 14484.1 1105.35  17 
  -3   0 -12 13641.8 1229.96  23 
   3   0  12 13693.9 1309.66  16 
   3   0 -12 10069.4 2622.62   1 
  -3   0  12 13566.1 1273.43  25 
  -3   0 -12 14279.5 1335.52  12 
  -3   0  12 13364.0 1118.68  26 
   3   0  12 15440.1 950.614   6 
  -3   0 -12 13539.3 3241.64   1 
  -3   0  12 14567.2 926.905   6 
  -3   0  12 13079.1 1416.04  16 
   3   0  12 14200.3 907.743  14 
  -3   0  12 13554.8 1281.48  24 
  -3   0  12 14265.2 1206.58  17 
  -3   0  12 13665.8 914.044  14 
   3   0 -13 47.7721 151.478  12 
  -3   0  13 50.1629 188.892  25 
   3   0  13-162.772 140.445   9 
  -3   0  13-166.129 184.069  17 
  -3   0  13-134.772 148.690  14 
  -3   0  13 212.761 238.811  16 
  -3   0  13 8.95088 199.792  24 
   3   0  13 67.5181 71.7428  14 
  -3   0  13 25.4504 63.7551   6 
  -3   0 -13 250.203 749.919   1 
   3   0  13 86.0693 110.787   6 
   3   0  13-78.1300 97.2564  16 
  -3   0  13-72.2057 54.6085  26 
  -3   0 -13 8.73203 76.4573  23 
  -3   0 -13 5.33811 67.0074  12 
   3   0  13 86.8267 91.3833  17 
  -3   0  14 82244.3 3368.22  25 
  -3   0 -14 76296.6 3126.79  12 
  -3   0 -14 92415.6 3189.62  23 
  -3   0  14 90925.0 3006.27  26 
   3   0  14 86564.4 2958.74  17 
   3   0  14 85948.2 2466.99  14 
   3   0  14 90280.7 2577.13   6 
  -3   0  14 92979.8 2557.72   6 
   3   0  14 84616.6 3477.54  16 
  -3   0  14 85353.8 3692.95  16 
  -3   0  14 84509.4 3422.46  24 
   3   0  14 83302.3 2571.75   9 
   3   0 -14 70088.2 3844.13  12 
  -3   0  14 88554.0 3133.18  17 
  -3   0  14 85474.0 2528.65  14 
  -3   0  15 38.1056 108.871  17 
  -3   0 -15-34.3244 135.414  12 
   3   0  15-104.739 125.375  16 
  -3   0  15 20.7434 40.7104  14 
  -3   0  15 260.713 289.688  16 
  -3   0  15-75.9086 78.9318  24 
   3   0  15 138.358 155.181  17 
   3   0  15 66.3689 89.0062   9 
  -3   0  15-273.747 248.081  26 
   3   0 -15 239.489 114.705  12 
  -3   0  15-93.9821 56.7899  25 
   3   0  15 95.8669 90.1297  14 
  -3   0  15 11.3315 57.1140   6 
   3   0  15-29.9651 80.3190   6 
  -3   0 -15 65.7910 58.9015  23 
  -3   0  16 10357.9 950.265  14 
   3   0  16 10234.3 1071.30  17 
   3   0  16 10586.6 958.588   9 
  -3   0  16 10814.6 939.075   6 
  -3   0  16 10163.3 1225.33  24 
  -3   0 -16 7123.71 1010.40  12 
  -3   0  16 9365.06 1317.06  16 
  -3   0  16 8693.56 1080.81  17 
  -3   0 -16 8943.15 1097.31  10 
   3   0  16 10983.0 947.288   6 
   3   0  16 10318.8 926.937  14 
  -3   0  16 9474.76 1167.88  25 
   3   0  16 9615.50 1246.35  16 
  -3   0  16 9681.56 1013.77  26 
  -3   0  17-54.3400 127.859  14 
   3   0  17-62.3784 127.819   6 
   3   0  17 10.0972 9.47002  16 
   3   0  17-5.49129 107.908  14 
  -3   0  17-37.2710 37.6673   6 
  -3   0  17 70.0441 55.4165  26 
   3   0  17 85.5902 129.416  17 
   3   0  17 47.8716 79.5961   9 
  -3   0  17-68.1078 160.910  17 
  -3   0  17 12.4364 170.527  16 
  -3   0 -17 98.6273 63.8430  10 
  -3   0  17-107.081 168.249  25 
  -3   0  17 43.0270 43.6469  24 
  -3   0 -18 1366.26 409.241  10 
   3   0  18 1441.98 353.370   6 
   3   0  18 1121.06 424.730  16 
   3   0  18 1598.36 371.517  14 
  -3   0  18 1606.81 381.240  14 
  -3   0  18 1529.65 350.412   6 
  -3   0  18 1568.89 476.727  24 
  -3   0  18 1047.11 369.133  17 
  -3   0  18 1449.33 480.248  21 
   3   0  18 1366.40 402.296  17 
  -3   0  18 1191.75 446.790  16 
  -3   0  18 1335.42 371.136  26 
  -3   0  18 1385.71 374.314  25 
   3   0  18 1596.08 357.498  15 
   3   0  19 43.7148 56.2100  17 
   3   0  19-9.36125 82.3614  16 
  -3   0  19 9.60764 128.805  16 
  -3   0 -19-226.219 174.300  10 
  -3   0  19 163.447 146.273  21 
   3   0  19 26.6838 79.7707  14 
  -3   0  19-234.831 241.173  24 
  -3   0  19 29.1747 170.555  17 
   3   0  19 205.212 109.232  15 
  -3   0  19-75.3509 109.762  14 
  -3   0  19 1.92763 158.214  25 
  -3   0 -20 4374.78 737.425  10 
  -3   0  20 4562.67 689.224  25 
   3   0  20 4926.71 821.480  16 
  -3   0  20 5610.70 696.812  14 
   3   0  20 5550.22 649.696  15 
  -3   0  20 4424.97 677.930  17 
  -3   0  20 4781.45 713.589  24 
   3   0  20 5536.22 650.528  14 
  -3   0  20 4563.76 824.912  16 
  -3   0  20 5229.32 803.903  21 
  -3   0  21 92.9000 106.913  24 
   3   0  21 54.6260 68.0967  15 
   3   0  21 18.9431 95.2773  21 
  -3   0  21-119.487 127.281  17 
  -3   0  21 149.387 149.141  16 
   3   0  21-29.5172 80.2239  14 
   3   0  21 184.392 201.313  16 
  -3   0  21 50.9934 16.5961  21 
  -3   0  21 222.463 170.075  14 
  -3   0  21-45.4351 131.988  25 
  -3   0 -21-8.41551 96.4329  10 
   3   0  22 16466.0 1210.21  16 
   3   0  22 20485.1 1079.68  14 
  -3   0  22 16772.8 1300.02  16 
  -3   0 -22 14148.9 1108.02  10 
  -3   0  22 16856.8 1155.15  17 
   3   0  22 20934.4 982.282  15 
   3   0  22 19495.8 1376.68  21 
  -3   0  22 15675.1 1004.86  25 
  -3   0  22 15826.5 1008.35  24 
  -3   0  22 19475.6 1323.16  21 
  -3   0  22 20227.8 1160.31  14 
   3   0 -23 11.9408 80.9624  10 
   3   0  23-73.0038 101.009  21 
  -3   0  23 17.5140 58.8557  14 
  -3   0  23 47.0625 37.5406  21 
  -3   0  23-115.795 123.095  16 
   3   0  23-11.1381 29.6589  16 
   4   0   0 43260.3 2460.70   1 
   4   0   0 45679.2 5337.73   4 
  -4   0   0 45871.8 1994.14   1 
   4   0  -1 171.862 573.149   4 
   4   0   1 39.5029 119.503   1 
  -4   0  -1-39.1756 89.8381   1 
   4   0   1-207.998 775.244   4 
   4   0  -1-40.6475 44.3449   1 
  -4   0   1 138.241 253.371   2 
   4   0  -1-39.5102 90.3627   1 
  -4   0   1-8.23676 208.294   3 
   4   0  -2 99504.5 4542.12   5 
   4   0   2 99071.6 8746.71   4 
  -4   0  -2 88454.0 3830.95   1 
   4   0  -2 115550. 3973.44   1 
   4   0  -2 94589.6 2534.34   1 
  -4   0   2 97807.3 5228.41   3 
  -4   0   2 102721. 5214.18   2 
   4   0   2 100000. 5188.07   1 
   4   0  -3 42.0571 56.6717   1 
  -4   0   3 110.929 183.162   3 
   4   0  -3-88.8103 262.532   1 
   4   0  -3-62.0639 103.358   5 
  -4   0   3-2.17478 113.689   2 
   4   0   3 75.0304 100.279   1 
  -4   0  -3 31.3633 163.700   1 
  -4   0   4 29643.2 3122.85   3 
  -4   0   4 30951.3 3123.55   2 
  -4   0  -4 30888.7 2876.20   1 
  -4   0   4 27399.8 2030.47   1 
   4   0  -4 20871.5 2450.07   1 
  -4   0   5-149.353 415.434   3 
  -4   0  -5 405.362 416.470   1 
   4   0  -5 80.2150 318.486   1 
  -4   0   5 36.0882 275.396   2 
  -4   0  -5-244.589 996.572   4 
  -4   0   5-62.5493 128.135   1 
  -4   0   6 61083.4 4183.40   1 
   4   0  -6 55141.0 4475.57   1 
  -4   0  -7-168.651 144.044   1 
  -4   0  -7-643.953 1073.17   4 
   4   0  -7-24.7406 300.755   1 
  -4   0   7-69.4585 220.298   1 
  -4   0  -8 74857.6 6084.99   1 
   4   0  -8 36538.7 3455.78   4 
   4   0  -8 52166.5 4673.39   1 
  -4   0  -8 95654.6 11681.7   4 
   4   0  -9 107.776 53.6993   4 
  -4   0   9-190.125 177.780  24 
  -4   0   9 48.3577 64.2493  25 
   4   0  -9 37.8844 364.243   1 
  -4   0  -9 80.6503 107.565  10 
  -4   0   9 41.6236 33.2859  14 
  -4   0  -9 648.053 1408.55   4 
  -4   0  -9-37.2500 24.4637  23 
  -4   0  -9-74.4557 110.412   1 
   4   0   9 180.332 139.049  17 
  -4   0   9 49.0744 68.4637  26 
  -4   0   9 120.150 156.403  17 
  -4   0   9-56.1461 105.253  20 
  -4   0  10 993.376 297.029  26 
  -4   0  10 1100.29 227.423   6 
  -4   0  10 968.344 320.168  17 
  -4   0  10 1114.85 351.424  25 
   4   0  10 1132.02 230.256  14 
  -4   0  10 1016.12 347.996  24 
   4   0  10 1258.81 255.110   6 
  -4   0 -10 1257.29 362.094  23 
  -4   0 -10 945.183 749.438   1 
   4   0 -10 780.079 696.597   1 
  -4   0 -10 1775.73 1279.75   4 
  -4   0  10 1114.35 228.910  14 
   4   0  10 1350.93 341.431  16 
  -4   0 -10 974.855 276.674  10 
   4   0  10 1474.53 318.672  17 
  -4   0  10 1261.02 286.300  20 
  -4   0 -10 1151.82 384.590  12 
  -4   0 -11-35.6008 29.8984  23 
  -4   0  11 11.1995 14.4362   8 
  -4   0 -11 15.8030 30.5896  10 
   4   0  11 9.30268 17.9515  17 
  -4   0  11-4.73304 66.6269   6 
   4   0  11 17.4880 66.2217  14 
  -4   0 -11-10.8113 149.282   1 
  -4   0  11 13.2480 134.304  24 
  -4   0  11 68.4536 66.2863  14 
   4   0 -11-3.97208 89.5634   1 
  -4   0 -11-46.3128 151.495  12 
  -4   0  11 49.2697 174.720  25 
  -4   0  11 31.4275 145.685  17 
   4   0  11 85.2180 57.4880   6 
   4   0  11 46.4267 76.0575  16 
  -4   0  11 146.417 161.566  26 
   4   0  11-55.0498 26.7382   9 
  -4   0  12 44468.4 1688.56  14 
  -4   0 -12 50490.2 2357.52  23 
   4   0  12 48014.0 2358.09  16 
  -4   0  12 44127.5 2414.46  24 
  -4   0  12 44087.7 2418.51  25 
   4   0  12 44949.4 1875.23   9 
  -4   0  12 45715.7 2131.74  26 
  -4   0 -12 44679.2 2252.60  12 
   4   0  12 47606.0 1995.13  17 
   4   0  12 45397.2 1656.93  14 
  -4   0  12 50202.5 1695.80   6 
   4   0  12 49269.4 1735.33   6 
  -4   0 -12 41965.0 2123.27  10 
  -4   0 -12 44053.6 5874.25   1 
  -4   0  12 46555.3 2177.38  17 
  -4   0  12 44378.6 2526.96  16 
  -4   0  13-43.9346 190.968  24 
   4   0  13-36.9756 70.5123   9 
  -4   0  13 30.8557 160.951  26 
  -4   0 -13 514.827 736.545   1 
  -4   0  13-29.3509 39.6304   6 
  -4   0  13 118.748 125.903  14 
   4   0  13 17.5750 133.128  16 
   4   0  13 51.5502 92.5340   6 
   4   0  13-41.2890 167.007  17 
  -4   0  13 18.8453 182.112  16 
  -4   0  13 30.5124 124.095  17 
  -4   0  13 309.807 287.709  25 
  -4   0 -13 76.7974 83.1010  12 
  -4   0 -13 118.022 88.7906  10 
   4   0  13-29.8134 63.0320  14 
  -4   0 -13-34.9696 62.7088  23 
  -4   0  14 8076.71 778.205  14 
   4   0  14 8909.41 790.203   6 
  -4   0 -14 8875.46 1022.18  23 
  -4   0  14 6979.25 1020.86  24 
  -4   0 -14 6441.14 918.299  12 
   4   0  14 7794.08 830.999   9 
   4   0  14 7881.19 1027.66  16 
  -4   0 -14 7215.31 936.305  10 
  -4   0  14 7471.27 1043.87  25 
  -4   0  14 8340.06 766.838   6 
   4   0  14 7858.40 740.234  14 
  -4   0  14 7491.18 1100.76  16 
   4   0 -14 5110.57 1127.16  12 
  -4   0  14 7718.17 931.975  26 
  -4   0  14 7078.37 932.345  17 
   4   0  14 8739.44 916.935  17 
  -4   0  15 226.931 259.264  24 
   4   0  15 3.76984 96.4321  14 
   4   0  15 62.8027 107.400   9 
   4   0  15-156.363 166.638  16 
  -4   0  15 118.260 94.4431   6 
  -4   0  15 129.038 144.311  14 
  -4   0  15-204.963 145.019  16 
  -4   0 -15-44.1270 159.132  23 
  -4   0  15-20.8208 146.093  25 
  -4   0 -15 29.6018 97.9574  12 
   4   0  15 49.4472 17.9870   6 
  -4   0 -15-123.699 157.152  10 
  -4   0  15-6.22666 92.8954  26 
   4   0 -15 237.310 249.482  12 
   4   0  15 40.8203 47.3818  17 
  -4   0  15-206.218 168.106  17 
  -4   0  16 5923.72 862.642  17 
  -4   0  16 6474.01 986.346  25 
   4   0  16 7162.25 756.163   6 
  -4   0 -16 6168.41 887.817  10 
   4   0  16 6987.19 781.593   9 
  -4   0  16 6149.44 843.107  26 
  -4   0 -16 5817.30 829.491  12 
   4   0  16 6829.50 722.870  14 
  -4   0  16 5476.06 1033.85  16 
  -4   0  16 6327.21 746.933  14 
   4   0  16 6126.75 977.738  16 
  -4   0  16 6248.37 975.295  24 
  -4   0  16 7341.80 759.946   6 
   4   0  16 6539.28 873.052  17 
   4   0  17 236.296 125.809  17 
  -4   0 -17 324.756 190.751  10 
   4   0  17 34.4413 127.212   6 
   4   0  17 129.990 117.371  14 
  -4   0  17-208.071 239.194  24 
  -4   0  17-13.9171 140.725  26 
  -4   0  17-116.058 114.827  21 
   4   0  17-213.041 162.183   9 
  -4   0  17 114.531 250.883  25 
  -4   0  17-34.3188 95.2518  14 
  -4   0  17-8.88914 208.946  16 
  -4   0  17 50.7980 87.6218  17 
  -4   0  17-27.2305 69.8459   6 
   4   0  17 152.794 151.493  16 
  -4   0 -18 208.422 55.6112  10 
  -4   0  18 92.4840 123.567  16 
  -4   0  18 158.639 154.920  24 
  -4   0  18 195.719 8.79025  25 
  -4   0  18 163.266 175.470  17 
   4   0  18 132.253 143.176  16 
  -4   0  18 203.572 139.665  14 
   4   0  18 382.727 193.308   9 
  -4   0  18 207.833 245.627  21 
   4   0  18 270.976 119.894  14 
   4   0  18 530.093 234.236  17 
  -4   0  18 162.230 158.264  26 
   4   0  18 336.827 220.075  15 
   4   0  19-53.2407 124.716  14 
  -4   0  19 136.450 234.642  24 
  -4   0  19-86.3940 89.6335  17 
  -4   0  19 118.666 91.8449  16 
  -4   0  19-102.309 157.686  14 
   4   0  19 6.60787 81.8494  16 
   4   0  19 48.5696 71.3604  15 
  -4   0  19-180.325 196.661  21 
  -4   0 -19 212.911 187.538  10 
  -4   0  19 23.2692 164.665  26 
  -4   0  19 78.1076 133.479  25 
  -4   0  20 5768.94 767.815  17 
  -4   0  20 6309.97 827.451  25 
   4   0  20 7727.17 749.823  15 
   4   0  20 5586.25 804.373  16 
  -4   0  20 6326.40 833.740  24 
  -4   0  20 5535.45 890.854  16 
  -4   0 -20 5887.95 791.913  10 
   4   0  20 6914.55 706.623  14 
  -4   0  20 6782.82 740.988  14 
  -4   0  20 6811.47 897.046  21 
  -4   0  21 167.942 128.476  25 
  -4   0  21 205.922 184.435  16 
  -4   0 -21 15.3405 70.6591  10 
   4   0  21-165.750 128.237  15 
  -4   0  21 146.245 177.869  24 
   4   0  21 15.8548 53.9683  14 
   4   0  21-201.572 140.725  21 
  -4   0  21 0.33955 66.9657  17 
  -4   0  21-119.890 20.2390  14 
  -4   0  21 93.9182 118.854  21 
   4   0  21 103.019 56.2346  16 
  -4   0  22 2015.36 366.827  24 
   4   0  22 2385.57 455.593  21 
  -4   0  22 2219.14 380.473  14 
  -4   0 -22 1636.58 356.609  10 
  -4   0  22 1930.20 362.046  25 
   4   0  22 2254.69 336.461  14 
  -4   0  22 2295.82 419.030  21 
  -4   0  22 1865.01 341.183  17 
   4   0  22 1758.88 362.451  16 
   4   0  22 2726.86 346.625  15 
  -4   0  22 1839.62 401.867  16 
  -4   0  23-84.9711 80.0541  14 
   4   0 -23-78.5665 130.211  10 
   5   0   0 18.2784 111.953   1 
  -5   0   0 99.9543 139.931   1 
   5   0   0-221.655 88.7127   4 
  -5   0   0 199.141 211.633   3 
  -5   0   0 42.7105 176.889   2 
   5   0  -1-432.309 674.901   4 
   5   0   1 24.0230 160.597   1 
  -5   0  -1-43.2634 130.048   1 
  -5   0   1 100.875 221.154   2 
   5   0  -1 201.819 193.515   1 
  -5   0   1-26.6269 205.803   3 
   5   0  -1 83.8202 181.112   1 
   5   0  -1 13.4321 232.003   5 
  -5   0  -2 2217.88 594.210   1 
   5   0  -2 2577.20 700.732   1 
   5   0  -2 2211.08 466.815   1 
   5   0  -2 2204.71 763.983   5 
  -5   0   2 2509.43 940.689   2 
  -5   0   2 2079.55 898.933   3 
   5   0  -2 1644.31 1153.29   4 
   5   0   2 2136.72 778.655   1 
   5   0  -3 56.2689 51.2924   1 
  -5   0   3-95.1563 233.104   2 
  -5   0  -3-8.60688 93.0727   1 
   5   0  -3 302.582 697.493   4 
  -5   0   3-167.392 250.642   3 
   5   0  -3-134.431 44.9305   1 
   5   0  -3 20.6730 233.474   5 
  -5   0   4 48344.8 4389.59   3 
  -5   0  -4 54001.1 3806.54   1 
   5   0  -4 40154.3 1747.09   1 
   5   0  -4 45911.6 2961.19   5 
  -5   0   4 47891.6 4296.07   2 
   5   0  -5 72.5386 201.307   1 
   5   0  -5-9.99196 49.5596   1 
  -5   0   5 125.709 435.564   3 
  -5   0  -5 71.8436 280.464   1 
  -5   0   5-265.621 252.087   2 
   5   0  -6 20549.6 2479.76   1 
  -5   0  -6 35457.1 3681.44   1 
  -5   0   7-161.357 218.070   1 
   5   0  -7 179.654 95.4803   1 
  -5   0  -7-347.460 417.325   1 
  -5   0   8 6764.26 851.480  24 
  -5   0  -8 6507.01 1815.20   1 
   5   0  -8 4868.55 1268.97   1 
  -5   0   8 6879.85 844.464  25 
  -5   0  -8 7429.35 710.215  10 
  -5   0  -8 8738.64 863.767  23 
  -5   0  -8 8553.64 813.339  27 
   5   0  -8 3868.61 1082.47   4 
  -5   0   8 7409.90 668.121  20 
  -5   0   8 7514.58 814.034  26 
  -5   0  -9 41.8276 66.5713  10 
  -5   0   9-72.1390 75.5358  14 
  -5   0   9 44.6518 34.2898  20 
   5   0  -9-198.031 282.081   1 
  -5   0  -9-47.5621 73.5467  23 
  -5   0  -9-26.1503 67.1140  12 
   5   0   9 27.6603 47.7907   6 
  -5   0   9-98.6603 151.354  24 
  -5   0   9-0.83045 124.736  25 
  -5   0  -9 272.586 365.220   1 
  -5   0   9 87.8724 155.133  26 
   5   0   9-98.9319 71.8002  17 
  -5   0   9-46.7997 66.4352  17 
  -5   0  10 48673.4 2431.54  25 
  -5   0 -10 48660.6 2149.22  12 
   5   0  10 54140.4 1643.64   6 
   5   0  10 52772.6 2170.90  16 
  -5   0 -10 54632.5 2392.97  23 
  -5   0  10 50196.1 2137.61  17 
   5   0  10 49515.8 1558.83  14 
  -5   0  10 51454.5 1519.89   6 
  -5   0 -10 47385.5 2064.60  10 
   5   0  10 52218.0 1911.06  17 
  -5   0  10 48953.6 1590.81  14 
  -5   0  10 49840.9 2463.87  24 
  -5   0 -10 50681.2 5715.71   1 
  -5   0  10 49828.9 1649.43   8 
  -5   0  10 49767.0 2254.72  26 
  -5   0  10 53685.4 1972.28  20 
  -5   0  11 38.1193 201.088  25 
   5   0  11 93.1544 111.763   9 
  -5   0  11 53.3903 62.2786  26 
  -5   0  11-26.3253 50.2293  20 
  -5   0  11-37.1923 94.2787  24 
  -5   0 -11-172.647 301.123   1 
   5   0  11 60.3324 26.5380  16 
   5   0  11 92.5220 4.74332  17 
   5   0  11 53.9079 69.5004  14 
  -5   0  11 7.32660 50.1858   8 
  -5   0 -11-85.4109 68.4181  23 
  -5   0 -11 55.7543 124.741  10 
  -5   0  11 28.2704 158.574  17 
  -5   0  11 23.8770 30.7956   6 
   5   0  11-62.4753 67.2819   6 
  -5   0 -11 50.1806 159.676  12 
  -5   0  11 52.7725 69.8413  14 
  -5   0  11-14.9232 19.0763  16 
   5   0  12 3866.87 547.405   9 
   5   0  12 3961.76 474.911   6 
  -5   0  12 3442.35 612.210  17 
   5   0  12 3897.81 472.838  14 
  -5   0 -12 4293.10 693.915  23 
  -5   0  12 3649.65 723.757  24 
   5   0  12 3980.22 592.610  17 
   5   0  12 3683.14 624.405  16 
  -5   0 -12 3396.30 591.060  10 
  -5   0  12 3646.69 735.647  25 
  -5   0 -12 3189.51 616.555  12 
  -5   0  12 3705.77 458.604   6 
  -5   0 -12 3753.56 1593.07   1 
  -5   0  12 2896.27 654.947  16 
  -5   0  12 3454.36 469.254  14 
  -5   0  12 3371.67 576.810  26 
  -5   0  13-19.9330 63.1964   6 
   5   0  13-108.835 114.072  17 
  -5   0 -13 116.210 186.057  10 
  -5   0  13-32.5386 211.293  24 
  -5   0 -13-5.41950 141.396  23 
  -5   0  13-25.7746 239.216  25 
  -5   0 -13-8.26581 82.3643  12 
  -5   0  13 154.733 214.807  17 
   5   0  13 101.332 152.658  16 
  -5   0  13 278.543 158.336  26 
   5   0  13-44.2787 102.791   9 
   5   0  13 23.7069 44.1964  14 
   5   0  13 133.917 133.188   6 
  -5   0  13 83.9543 67.4487  16 
  -5   0  13 2.18743 104.083  14 
  -5   0 -14 2674.04 527.548  23 
  -5   0  14 2041.28 535.675  25 
  -5   0  14 2104.01 486.689  26 
  -5   0  14 2290.26 387.482   6 
  -5   0 -14 2196.50 501.226  12 
   5   0  14 2235.40 469.646   9 
   5   0  14 2129.81 523.992  16 
   5   0  14 2283.11 394.454  14 
  -5   0  14 2257.24 422.575  14 
   5   0  14 2484.68 491.178  17 
  -5   0  14 2274.74 598.095  24 
  -5   0 -14 2159.10 494.918  10 
   5   0  14 2720.69 441.903   6 
  -5   0  14 2196.74 581.173  16 
  -5   0  14 2105.38 504.043  17 
  -5   0 -15 91.1417 119.773  10 
  -5   0  15-32.5875 148.437  25 
  -5   0  15 34.5990 85.0082   6 
   5   0  15-40.5786 132.593  17 
   5   0  15-38.2647 100.552   9 
   5   0 -15 108.848 163.436  12 
   5   0  15 101.490 17.4087  14 
  -5   0  15 77.2710 89.8152  21 
  -5   0  15-30.8606 13.6442  16 
   5   0  15 77.2655 103.407   6 
   5   0  15 61.1672 73.3017  16 
  -5   0 -15-129.925 187.965  23 
  -5   0  15 142.539 199.457  24 
  -5   0  15 36.2207 97.5745  14 
  -5   0 -15-86.1868 99.3302  12 
  -5   0  15-116.248 184.285  26 
  -5   0  15-32.5339 122.886  17 
  -5   0  16-118.661 107.557  17 
  -5   0  16 57.4432 134.272   6 
   5   0  16-108.870 145.659  17 
   5   0  16 28.0271 87.2796   6 
  -5   0  16 307.994 220.783  21 
  -5   0 -16 170.199 104.681  10 
  -5   0  16 35.8605 83.2215  26 
   5   0  16-10.5178 102.305   9 
   5   0  16 94.2578 118.258  14 
  -5   0  16-121.334 173.840  24 
   5   0  16 55.4970 123.815  16 
  -5   0  16 39.6664 46.9376  14 
  -5   0 -16-77.8875 81.4697  12 
  -5   0  16 94.6936 117.590  16 
  -5   0  16-61.1922 144.253  25 
  -5   0  17-335.098 264.366  21 
   5   0  17-100.780 203.969  16 
   5   0  17 58.0856 6.61478  14 
  -5   0  17 95.9902 49.0898  24 
  -5   0  17 213.859 219.353  17 
  -5   0  17-94.6164 53.1686  14 
   5   0  17 169.378 161.684   9 
  -5   0  17 231.787 219.505  26 
  -5   0  17-55.7336 149.695  16 
  -5   0  17 79.8332 126.146  25 
  -5   0 -17 124.286 182.268  10 
  -5   0  18 584.533 259.300  16 
  -5   0  18 568.766 271.939  21 
   5   0  18 803.118 228.916  15 
  -5   0 -18 752.311 279.975  10 
   5   0  18 366.547 186.389  16 
  -5   0  18 747.334 226.739  14 
  -5   0  18 442.711 233.350  25 
  -5   0  18 698.234 255.363  17 
   5   0  18 575.415 240.097  14 
   5   0  18 644.378 261.211   9 
  -5   0  18 694.691 268.794  26 
  -5   0  18 681.456 367.823  24 
   5   0  19-57.9398 127.231  15 
  -5   0  19-114.316 169.362  24 
  -5   0 -19-89.2938 124.372  10 
   5   0  19-141.237 74.7881  14 
  -5   0  19-142.725 119.636  16 
   5   0  19-137.557 193.918  16 
  -5   0  19-202.898 180.488  14 
  -5   0  19-17.7040 119.816  26 
  -5   0  19 133.148 196.149  25 
   5   0  19 59.9073 69.5734   9 
  -5   0  19 60.5823 144.140  21 
  -5   0  19 249.019 227.690  17 
   5   0  20 2065.57 384.019  15 
  -5   0  20 1807.45 412.693  17 
  -5   0  20 1483.39 403.898  24 
  -5   0  20 1758.47 357.444  14 
   5   0  20 1819.25 321.699  14 
  -5   0  20 1742.14 433.112  25 
  -5   0  20 1640.94 393.960  21 
  -5   0  20 1345.02 383.389  16 
   5   0  20 1589.33 378.511  16 
  -5   0 -20 1254.78 361.390  10 
  -5   0  21 111.212 115.773  25 
  -5   0  21-284.194 170.428  17 
  -5   0  21-159.421 118.154  21 
  -5   0  21-241.112 161.986  16 
  -5   0  21 25.2880 85.1474  14 
  -5   0 -21 38.1097 57.8804  10 
   5   0  21 130.636 108.865  14 
   5   0  21 55.5677 39.9600  21 
   5   0  21-114.612 99.3707  15 
  -5   0  21 58.1936 79.8430  24 
   5   0  21 78.3593 99.1323  16 
  -5   0  22 8492.77 749.381  25 
  -5   0  22 6933.41 658.496  17 
  -5   0  22 9499.88 716.278  14 
   5   0  22 10389.5 890.901  21 
  -5   0 -22 7597.25 692.120  10 
  -5   0  22 7334.42 739.875  16 
  -5   0  22 8729.05 759.881  24 
   5   0  22 11220.9 721.837  15 
   6   0   0 62390.5 4249.40   1 
  -6   0   0 76704.4 5648.62   2 
  -6   0   0 75627.2 5710.98   3 
  -6   0   0 70009.8 3004.28   1 
  -6   0  -1-52.7531 103.041   1 
  -6   0   1-195.320 426.945   2 
   6   0  -1-84.5669 43.6521   1 
  -6   0   1-256.740 441.427   3 
   6   0   1-56.9751 138.492   1 
   6   0  -1 122.269 212.993   1 
  -6   0   2 1516.89 753.981   3 
  -6   0   2 1841.61 775.707   2 
   6   0  -2 1534.77 464.733   1 
   6   0  -2 2068.93 892.001   5 
  -6   0  -2 2020.79 607.817   1 
   6   0  -2 1784.38 644.491   1 
   6   0  -3-88.1943 120.267   1 
  -6   0   3-72.8660 283.151   2 
   6   0  -3-123.005 205.044   1 
  -6   0   3 46.6692 262.896   3 
  -6   0  -3 30.0355 213.222   1 
   6   0  -3-14.9071 168.561   5 
   6   0  -4 68962.5 8906.35   4 
   6   0  -4 77492.6 4532.86   5 
   6   0  -4 50574.7 2065.56   1 
  -6   0  -4 109809. 5643.85   1 
  -6   0   4 83678.7 6166.52   2 
   6   0  -4 33883.3 2829.28   1 
  -6   0   4 85399.4 6340.93   3 
   6   0  -5 66.8499 66.8031   1 
  -6   0   5-102.138 208.395   3 
  -6   0  -5 204.229 318.529   1 
  -6   0   5 266.883 341.877   2 
   6   0  -5 26.0443 139.556   1 
  -6   0  -6 73777.7 5468.38   1 
  -6   0  -6 83915.2 2732.08  23 
  -6   0  -6 91125.4 2693.87  27 
  -6   0   6 68022.8 2528.76  26 
  -6   0   7 150.388 191.748  24 
  -6   0   7 146.123 97.1927  25 
  -6   0  -7 27.2710 85.4696  10 
  -6   0   7 20.8206 49.9546  20 
  -6   0   7-2.99187 163.624  26 
  -6   0  -7-51.2246 48.4625  23 
  -6   0  -7-22.2453 68.1157  12 
  -6   0  -7 92.1393 378.875   1 
  -6   0  -7-43.3800 47.5874  27 
  -6   0   8 38065.0 2068.74  25 
  -6   0  -8 36103.4 4382.95   1 
  -6   0   8 39868.7 1630.82  20 
  -6   0  -8 39438.3 1712.81  10 
  -6   0  -8 41214.8 2031.23  23 
  -6   0   8 37469.0 2055.11  24 
  -6   0   8 39216.3 2004.42  26 
  -6   0   8 36430.8 1736.95  17 
  -6   0  -8 46792.6 2016.72  27 
  -6   0  -8 41201.0 1769.20  12 
  -6   0   9-68.4326 128.050  26 
  -6   0   9 104.440 35.7337  25 
  -6   0  -9-22.5623 62.7793  12 
  -6   0   9-52.1357 90.6113  17 
  -6   0  -9-140.622 480.638   1 
   6   0   9-7.31852 55.9113   6 
  -6   0  -9-88.2135 53.5801  23 
  -6   0  -9 36.6809 41.7269  10 
  -6   0   9-60.1541 125.204  24 
  -6   0  -9 162.228 177.561  27 
  -6   0   9 34.2533 26.1448  14 
  -6   0   9 38.8099 72.3315  20 
  -6   0 -10 408.180 514.463   1 
  -6   0  10 339.492 196.523  21 
  -6   0  10 426.691 278.344  26 
  -6   0  10 232.631 165.363   8 
  -6   0  10 280.669 159.861  25 
  -6   0  10 203.383 195.492  17 
  -6   0 -10 312.542 155.938  10 
  -6   0 -10 323.907 118.150  12 
  -6   0 -10 522.092 204.271  23 
  -6   0  10 168.343 144.265  16 
  -6   0  10 254.898 135.204  14 
   6   0  10 383.041 135.142   6 
  -6   0  10 232.639 79.4884  20 
  -6   0  10 257.599 186.283  24 
  -6   0 -11-365.881 869.111   1 
  -6   0  11 181.864 185.486  16 
  -6   0  11-37.5417 81.6426  21 
  -6   0  11-11.4054 71.4654  17 
  -6   0 -11 21.9508 124.838  10 
  -6   0  11 99.6701 89.4569  26 
   6   0  11-9.10882 65.4262   6 
  -6   0 -11-114.664 134.246  23 
  -6   0  11 85.7808 187.622  25 
  -6   0  11 13.1747 68.2604  24 
  -6   0 -11 69.4290 163.658  12 
  -6   0  11 168.486 134.807   8 
  -6   0  11-76.6516 92.3640  14 
  -6   0  11-6.01412 86.5346  20 
   6   0  11-49.5016 99.9020  16 
   6   0  11-120.411 77.7713   9 
   6   0  12 1898.74 433.873  16 
  -6   0  12 2002.18 493.766  26 
   6   0  12 2269.03 433.027   9 
   6   0  12 2530.57 394.044   6 
  -6   0 -12 2571.03 560.653  23 
  -6   0  12 1932.12 350.740   8 
  -6   0  12 2147.42 546.682  24 
  -6   0  12 1777.45 511.693  16 
  -6   0  12 2086.57 379.017  14 
  -6   0 -12 2240.73 485.872  12 
  -6   0  12 2072.48 567.357  25 
  -6   0 -12 2130.66 462.140  10 
  -6   0  12 2027.80 430.974  21 
   6   0  12 2054.88 343.949  14 
  -6   0  12 1872.94 475.714  17 
  -6   0  13-84.8981 41.6420  21 
  -6   0  13-169.007 228.079  24 
  -6   0  13 165.589 146.384  26 
   6   0  13-24.0525 52.9999  14 
  -6   0 -13 74.0678 39.0077  23 
  -6   0 -13 49.4219 62.0927  12 
  -6   0  13-204.796 224.858  25 
   6   0  13 63.9838 67.3839  16 
  -6   0  13-20.0470 41.8802  14 
  -6   0  13-5.31352 31.6989  16 
   6   0  13 85.6423 45.4653   6 
   6   0  13 14.3341 90.7003   9 
  -6   0  13-40.9846 180.610  17 
  -6   0 -13 146.353 113.977  10 
  -6   0 -14 4994.46 746.761  12 
   6   0  14 5332.74 609.988  14 
  -6   0  14 5230.82 941.568  25 
  -6   0  14 4747.51 764.326  26 
  -6   0 -14 6878.21 926.891  23 
   6   0  14 5467.28 722.578   9 
  -6   0  14 5346.83 588.189   6 
   6   0  14 5977.89 634.471   6 
  -6   0  14 5058.30 787.823  21 
   6   0  14 5036.35 769.410  16 
  -6   0  14 4938.55 659.983  14 
  -6   0 -14 5271.16 786.718  10 
  -6   0  14 3949.08 825.169  16 
  -6   0  14 4558.29 736.600  17 
  -6   0  14 5170.29 943.887  24 
  -6   0  15 74.0417 255.051  25 
  -6   0 -15 136.008 163.695  23 
  -6   0 -15-161.931 154.293  12 
   6   0  15 40.9886 89.9023  14 
  -6   0  15 166.968 162.806  21 
  -6   0  15-16.1918 96.7792  24 
  -6   0 -15-3.82011 118.193  10 
   6   0  15 0.37540 61.0392   9 
   6   0  15-3.80093 38.1576   6 
  -6   0  15-34.9508 119.807  26 
  -6   0  15 147.993 193.879  16 
   6   0  15-125.650 117.361  16 
  -6   0  15 111.201 47.5008  17 
  -6   0  15 126.886 93.6231   6 
  -6   0  15 186.511 107.107  14 
  -6   0 -16 5947.55 822.810  10 
  -6   0  16 5869.19 724.219  14 
  -6   0  16 6476.63 861.274  26 
   6   0  16 6088.12 771.102   9 
  -6   0  16 6185.92 1016.74  24 
   6   0  16 6271.63 677.212  14 
  -6   0  16 6143.14 991.773  25 
  -6   0  16 4872.38 921.827  16 
  -6   0 -16 5220.14 748.051  12 
   6   0  16 5749.37 842.946  16 
  -6   0  16 5527.09 796.042  17 
  -6   0  16 5528.66 829.339  21 
   6   0  17 16.7851 160.649  16 
  -6   0  17 24.9275 91.5364  21 
  -6   0 -17 146.776 79.6897  10 
  -6   0  17 26.9286 22.9676  26 
  -6   0  17 440.568 296.402  24 
   6   0  17-35.2391 79.4200   9 
   6   0  17 214.531 162.382  14 
  -6   0  17 62.4079 170.797  17 
  -6   0  17 134.226 170.137  16 
  -6   0  17-51.6939 189.710  25 
  -6   0  17-102.452 147.149  14 
  -6   0  18 14275.4 1435.23  24 
  -6   0  18 14942.1 1097.42  14 
  -6   0  18 13660.8 1259.71  21 
  -6   0  18 12130.7 1177.09  17 
  -6   0 -18 12497.9 1179.61  10 
  -6   0  18 12076.3 1300.28  16 
  -6   0  18 13344.6 1213.57  26 
   6   0  18 14945.9 1000.08  14 
   6   0  18 14497.2 1155.79   9 
   6   0  18 15056.4 1141.32  15 
  -6   0  18 14547.4 1435.45  25 
   6   0  18 11796.8 1167.34  16 
  -6   0  19 57.7894 162.867  17 
  -6   0  19 85.2173 161.078  14 
  -6   0  19 181.172 114.337  26 
  -6   0  19 145.642 136.048  16 
   6   0  19 129.328 112.651   9 
  -6   0 -19 243.234 134.572  10 
  -6   0  19-189.893 88.1757  24 
  -6   0  19 35.6579 82.3892  25 
  -6   0  19 247.467 186.517  21 
   6   0  19-112.318 125.985  16 
   6   0  19 140.818 128.164  15 
  -6   0  20 342.172 174.911  16 
  -6   0  20 722.166 234.851  17 
  -6   0  20 771.712 225.546  14 
  -6   0  20 611.070 292.257  24 
   6   0  20 878.502 239.331  15 
  -6   0 -20 546.022 239.265  10 
  -6   0  20 499.760 182.260  25 
  -6   0  20 748.393 273.471  21 
   6   0  20 725.359 242.010   9 
   6   0  20 524.220 207.434  16 
   6   0  20 692.353 247.392  21 
  -6   0  21-77.8816 100.657  25 
   6   0  21-121.759 50.5272  15 
  -6   0 -21-78.4233 48.3091  10 
  -6   0  21-29.3575 65.0296  14 
  -6   0  21 94.1545 81.9179  16 
   6   0  21-125.057 17.7073  21 
  -6   0  21 85.8878 63.2324  24 
  -6   0  21 105.196 94.8094  17 
  -6   0  22 144.543 91.5083  24 
   6   0  22 91.8832 72.5096  15 
  -6   0  22-80.4916 122.613  25 
  -7   0   0-181.108 118.974   2 
  -7   0   0-307.327 616.869   3 
   7   0   0 20.2678 117.696   1 
  -7   0  -1 139.974 180.739   2 
  -7   0   1 11.4485 194.799   2 
  -7   0  -1 30.1179 28.8748   1 
   7   0  -1 222.473 282.055   1 
  -7   0  -1 38.3370 247.109   3 
   7   0  -1-151.905 317.164   1 
  -7   0   1 173.720 300.348   3 
  -7   0  -2 12932.0 1664.58   1 
  -7   0   2 11292.1 2497.79   2 
  -7   0   2 11401.6 2520.56   3 
   7   0  -2 11321.9 1726.52   1 
  -7   0   3-3.95726 31.5473   2 
  -7   0   3 37.0671 212.784   3 
  -7   0  -3 133.957 249.094   1 
   7   0  -3 157.732 168.508   1 
  -7   0   4 8076.12 2136.05   3 
  -7   0   4 8469.32 780.097  20 
  -7   0   4 7969.37 2082.03   2 
  -7   0   4 9762.84 798.253  10 
  -7   0  -4 12784.3 1022.69  27 
  -7   0  -4 9484.10 740.792  12 
  -7   0  -4 10707.0 1827.90   1 
  -7   0  -5 10.7503 76.9973  10 
  -7   0  -5-155.483 101.698  18 
  -7   0  -5 123.370 79.4616  27 
  -7   0  -5-69.6269 224.281   1 
  -7   0   5 168.549 169.580   2 
  -7   0  -5-46.8222 59.3014  23 
  -7   0  -5 0.49435 52.4306  12 
  -7   0   5 15.0681 71.5282  26 
  -7   0   5-23.5770 66.1156  20 
  -7   0   5-10.8905 43.7130  10 
  -7   0   5-18.3004 189.518   3 
  -7   0   6 89.9390 103.822  20 
  -7   0  -6 342.619 331.716   1 
  -7   0  -6-66.1205 167.782  18 
  -7   0   6-91.7374 136.328  24 
  -7   0  -6 144.197 197.045  27 
  -7   0  -6 14.2971 21.9312  10 
  -7   0  -6 136.348 174.088  23 
  -7   0   6-54.8137 509.794   2 
  -7   0   6 182.436 171.338   3 
  -7   0  -6 151.446 75.0357  12 
  -7   0   6 34.4640 101.826  25 
  -7   0   6 55.1531 178.026  26 
  -7   0  -7 5.84040 73.6173  27 
  -7   0   7 59.6167 67.0755  26 
  -7   0   7 44.6283 78.6120  17 
  -7   0   7 99.0033 130.292  24 
  -7   0  -7-16.8731 202.735   1 
  -7   0  -7-18.6538 54.8022  23 
  -7   0   7-37.5511 113.093  25 
  -7   0  -7-8.27272 39.1258  10 
  -7   0  -7-100.625 103.215  12 
  -7   0   7 69.2647 103.568  20 
  -7   0  -7-14.5621 69.1710  18 
  -7   0  -8 3946.51 610.754  27 
  -7   0   8 3319.83 641.542  24 
  -7   0  -8 2980.32 1241.55   1 
  -7   0  -8 3971.15 614.209  23 
  -7   0   8 2977.87 514.529  17 
  -7   0  -8 3411.45 506.606  12 
  -7   0   8 2660.99 580.226  26 
  -7   0  -8 3597.87 717.303  18 
  -7   0  -8 3395.30 485.729  10 
  -7   0   8 3439.27 634.697  25 
  -7   0   8 3296.37 491.594  20 
  -7   0   9 54.4252 158.025  24 
  -7   0  -9-1.01359 45.0699  12 
  -7   0   9-25.5293 56.5027  14 
  -7   0  -9 127.496 391.213   1 
  -7   0  -9 18.2496 61.2001  10 
  -7   0  -9 0.52630 64.4548  18 
  -7   0  -9-63.7946 77.6947  23 
  -7   0   9-71.8065 149.201  25 
  -7   0   9-65.4284 126.639  17 
  -7   0   9-7.19001 53.1359  26 
  -7   0  -9-102.169 143.955  27 
  -7   0   9-40.7743 43.7748  20 
  -7   0  10 10740.0 796.893  14 
  -7   0 -10 12318.5 1038.58  10 
  -7   0  10 12427.5 1036.84  20 
  -7   0 -10 12236.3 1035.14  12 
  -7   0 -10 11036.9 2715.65   1 
  -7   0  10 11614.9 1235.51  26 
  -7   0  10 11927.2 1279.24  25 
  -7   0 -10 14779.8 1305.87  23 
  -7   0  10 11942.1 1281.38  24 
  -7   0  10 11085.3 1091.36  17 
  -7   0  11-254.564 170.079  17 
  -7   0 -11 69.3760 240.587  23 
   7   0  11 12.1704 67.0115   6 
  -7   0  11 9.00979 179.873  26 
  -7   0 -11 58.5991 107.486  10 
  -7   0  11-63.3643 92.8258  14 
  -7   0  11 217.903 180.332  25 
  -7   0  11 167.551 112.553  20 
   7   0  11 36.7775 115.377   9 
  -7   0 -11 124.273 71.1407  12 
  -7   0  11 138.577 237.767  24 
  -7   0  11 139.353 131.500  16 
  -7   0 -12 6974.29 921.878  23 
  -7   0  12 5767.46 763.855  20 
  -7   0  12 5495.50 937.183  25 
  -7   0  12 5756.55 622.069  14 
  -7   0  12 4661.17 765.057  17 
   7   0  12 5829.80 718.858   9 
  -7   0  12 5439.70 914.318  24 
  -7   0 -12 5570.25 758.264  10 
   7   0  12 5998.66 599.253   6 
  -7   0 -12 5975.53 772.106  12 
  -7   0  12 4298.65 778.752  16 
  -7   0  12 5329.52 804.147  26 
  -7   0 -13-56.0748 168.065  10 
  -7   0  13-78.6661 101.199  25 
   7   0  13 127.416 178.252   9 
  -7   0  13 55.1309 167.200  26 
  -7   0  13 48.6818 79.9223  14 
  -7   0  13 65.4171 71.9531  21 
  -7   0 -13 29.4992 30.3570  12 
  -7   0  13-51.7817 73.6718  17 
  -7   0  13 47.7788 98.2570  16 
  -7   0  13 60.7740 143.965  24 
  -7   0 -13-28.2703 183.696  23 
  -7   0 -14 1215.23 420.172  23 
  -7   0  14 609.786 249.045  21 
  -7   0  14 760.666 355.016  25 
  -7   0  14 771.071 263.172  17 
  -7   0  14 612.726 367.178  16 
  -7   0 -14 671.778 264.889  12 
  -7   0 -14 888.654 317.129  10 
  -7   0  14 755.088 298.419  24 
  -7   0  14 605.965 307.343  26 
  -7   0  14 515.050 202.519  14 
   7   0  14 845.654 249.250   9 
  -7   0  15 212.458 208.493  21 
  -7   0 -15 45.6734 87.2327  12 
  -7   0  15-141.622 218.307  25 
   7   0  15-135.325 121.620   9 
  -7   0  15 63.9163 190.109  24 
  -7   0 -15-54.1357 167.769  10 
  -7   0  15-10.0482 62.6437  17 
  -7   0  15 174.359 141.286  26 
  -7   0  15-123.933 177.381  16 
  -7   0  15 130.736 153.317  14 
  -7   0  16 1095.44 364.026  21 
  -7   0  16 1191.94 454.617  24 
   7   0  16 1122.01 338.852   9 
  -7   0  16 951.632 275.630  14 
  -7   0  16 857.232 352.430  17 
  -7   0  16 1219.30 493.719  25 
  -7   0  16 822.925 362.480  16 
  -7   0 -16 1432.00 416.994  10 
  -7   0  16 1080.27 363.094  26 
  -7   0 -16 966.251 279.821  12 
  -7   0  17-158.652 75.7719  21 
  -7   0  17 167.558 111.168  26 
  -7   0  17 53.5253 138.476  17 
   7   0  17 48.4062 131.751  15 
  -7   0  17 65.5537 127.272  24 
  -7   0  17-165.367 136.975  14 
  -7   0 -17-14.6973 90.3237  10 
   7   0  17-57.4320 27.1835   9 
  -7   0  17-90.5390 155.562  25 
  -7   0  17 108.137 153.953  16 
   7   0  18 19396.8 1283.87  15 
  -7   0 -18 16920.6 1282.26  10 
  -7   0  18 17793.2 1571.65  25 
  -7   0  18 15329.2 1240.30  17 
  -7   0  18 16924.1 1165.40  14 
  -7   0  18 13857.2 1262.07  16 
  -7   0  18 17740.9 1559.21  24 
  -7   0  18 17200.5 1345.19  26 
   7   0  18 18743.8 1287.02   9 
   7   0  19 197.516 140.907   9 
  -7   0 -19 87.7593 118.870  10 
  -7   0  19 113.789 124.357  17 
  -7   0  19 199.952 138.847  16 
  -7   0  19 15.5796 68.0275  14 
   7   0  19 84.6886 42.7527  15 
  -7   0  19 9.16210 95.2329  25 
  -7   0  19-141.946 28.9652  26 
  -7   0  19-17.9159 89.4054  24 
  -7   0  20 1933.26 382.468  26 
  -7   0 -20 1650.54 343.354  10 
   7   0  20 2042.05 407.508  21 
  -7   0  20 2043.07 426.628  24 
  -7   0  20 1969.90 418.793  25 
  -7   0  20 1235.20 305.978  17 
   7   0  20 2211.34 382.881   9 
  -7   0  20 1902.46 322.129  14 
   7   0  20 2463.33 394.295  15 
  -7   0  21 119.793 68.0104  24 
  -7   0  21-167.257 145.666  25 
   7   0  21 49.8091 77.3643  15 
  -7   0 -21-138.330 105.033  10 
  -8   0   0 43603.4 2336.00  18 
  -8   0   0 36557.9 1484.30  12 
   8   0   0 46440.4 3939.71   1 
  -8   0   0 47920.5 1817.88  10 
  -8   0   0 39299.7 4795.73   2 
  -8   0   0 44439.8 5237.49   3 
  -8   0  -1-31.8000 281.244   3 
   8   0  -1 122.233 290.042   1 
  -8   0   1-238.943 126.354   3 
  -8   0  -1 76.8120 17.9510  10 
  -8   0   1 99.6506 104.610  18 
  -8   0  -1-50.8378 107.272   1 
  -8   0  -1 89.4138 563.992   2 
  -8   0  -1 36.7967 38.0000  12 
  -8   0  -1-174.977 129.875  18 
  -8   0   1 30.1332 76.7149  10 
  -8   0   1 89.0423 499.124   2 
  -8   0  -2 28667.3 2634.22   1 
  -8   0  -2 31642.1 4430.70   2 
  -8   0   2 30783.3 1447.75  10 
  -8   0  -2 34323.1 2177.75  18 
  -8   0  -2 30116.6 4372.60   3 
  -8   0  -2 29678.0 1359.07  12 
  -8   0   2 26636.1 4274.00   3 
  -8   0   2 33012.4 1960.62  18 
  -8   0   2 25695.6 4077.16   2 
  -8   0  -2 34346.0 1718.39  27 
  -8   0  -2 33875.2 1418.07  10 
  -8   0  -3-63.3733 32.8000  12 
  -8   0  -3 171.551 206.365   1 
  -8   0   3 301.715 625.853   2 
  -8   0  -3 95.9284 110.661  18 
  -8   0  -3-33.0763 86.0044  27 
  -8   0   3-48.1274 46.7562  10 
  -8   0   3-398.072 489.208   3 
  -8   0   3 68.7733 169.543  18 
  -8   0  -3-5.84008 90.6227  10 
  -8   0  -3 524.194 220.559  23 
  -8   0  -4 9471.81 799.116  12 
  -8   0  -4 12644.1 1050.75  27 
  -8   0   4 8693.83 854.530  20 
  -8   0  -4 11182.1 970.047  23 
  -8   0  -4 10823.7 1233.79  18 
  -8   0  -4 10221.3 1832.93   1 
  -8   0   4 8060.46 2333.99   2 
  -8   0   4 9536.43 987.142  18 
  -8   0  -4 10412.0 803.345  10 
  -8   0   4 8715.62 1014.63  26 
  -8   0   4 8339.33 2431.03   3 
  -8   0   4 9947.81 857.714  10 
  -8   0   5 19.9849 31.1986  25 
  -8   0  -5 21.1419 116.684  12 
  -8   0  -5 55.7625 86.3464  10 
  -8   0  -5 37.4301 54.3697  27 
  -8   0   5-22.9415 77.0256  24 
  -8   0   5-103.540 137.408  26 
  -8   0   5-53.5266 322.162   3 
  -8   0   5-50.7393 122.181  20 
  -8   0   5-61.1846 86.1521  10 
  -8   0   5-28.6739 59.1956  18 
  -8   0   5 225.495 610.160   2 
  -8   0  -5 159.990 146.048  23 
  -8   0  -5-121.906 114.878  18 
  -8   0  -5 126.446 204.670   1 
  -8   0   6 8350.41 2514.63   2 
  -8   0  -6 12311.1 1076.00  23 
  -8   0   6 9479.08 984.847  24 
  -8   0   6 8512.10 2577.90   3 
  -8   0   6 9453.68 1113.53  26 
  -8   0  -6 11604.8 1299.97  18 
  -8   0   6 9108.34 988.545  25 
  -8   0   6 9474.38 928.617  18 
  -8   0  -6 11060.9 2179.17   1 
  -8   0  -6 10352.6 837.002  10 
  -8   0  -6 11816.7 1081.50  27 
  -8   0   6 9417.36 888.231  20 
  -8   0  -6 8184.79 774.385  12 
  -8   0  -7 110.342 49.9174  27 
  -8   0  -7 69.2724 111.242  12 
  -8   0   7-66.7830 89.9204  18 
  -8   0  -7-39.8364 9.55115  10 
  -8   0  -7 28.5666 81.3615  23 
  -8   0   7-119.512 102.940  17 
  -8   0  -7 65.1177 154.947  18 
  -8   0   7-7.88402 88.0585  25 
  -8   0  -7-17.7666 295.257   1 
  -8   0   7-10.9668 84.8002  24 
  -8   0   7-45.1544 46.1493  20 
  -8   0   7 97.9061 196.513  26 
  -8   0   8 1802.74 471.794  25 
  -8   0  -8 2751.76 494.025  27 
  -8   0   8 1700.74 466.087  26 
  -8   0  -8 2246.10 421.059  12 
  -8   0  -8 2260.97 1101.50   1 
  -8   0  -8 1968.94 545.067  18 
  -8   0   8 2135.88 529.669  24 
  -8   0  -8 2919.94 532.350  23 
  -8   0   8 2161.17 434.573  20 
  -8   0  -8 2428.80 431.740  10 
  -8   0   8 1847.92 432.990  17 
  -8   0  -9 111.431 80.4996  10 
  -8   0  -9 22.5349 424.376   1 
  -8   0   9-221.847 137.594  26 
  -8   0  -9 41.7943 154.581  23 
  -8   0  -9-66.5127 68.6239  12 
  -8   0   9-31.9216 22.3999  17 
  -8   0   9 35.3541 38.6667  20 
  -8   0   9 12.3571 152.480  24 
  -8   0   9 50.8995 138.631  25 
  -8   0  -9 158.902 143.004  18 
  -8   0  10 736.833 298.945  17 
  -8   0 -10 568.300 149.272  12 
  -8   0 -10 948.847 298.158  10 
  -8   0 -10 828.800 297.083  23 
  -8   0  10 762.268 306.281  20 
  -8   0 -10 984.775 343.003  18 
  -8   0  10 731.793 334.035  26 
  -8   0  10 479.802 298.367  24 
  -8   0  10 604.264 331.645  25 
  -8   0 -11 49.8420 41.6475  12 
  -8   0  11-334.992 228.766  25 
  -8   0  11 111.227 232.733  26 
   8   0  11 0.37203 114.714   9 
  -8   0 -11-75.6959 87.7781  10 
  -8   0 -11 68.3254 186.949  23 
  -8   0  11 35.9183 33.3038  24 
  -8   0  11 42.6960 174.206  17 
  -8   0  11 31.5360 21.3284  20 
   8   0  12 11524.9 1058.57   9 
  -8   0 -12 12088.0 1102.97  12 
  -8   0  12 10415.4 1079.90  17 
  -8   0  12 11841.0 1104.61  20 
  -8   0 -12 11067.3 1056.03  10 
  -8   0  12 10597.4 1341.30  24 
  -8   0  12 9061.39 822.122  14 
  -8   0 -12 12152.9 1289.08  23 
  -8   0  12 10616.1 1340.48  25 
  -8   0  12 9500.67 1246.75  26 
  -8   0 -13 31.4631 134.389  10 
  -8   0  13-78.0605 143.341  17 
  -8   0  13-117.435 171.974  25 
  -8   0  13 63.2443 81.8927  14 
  -8   0 -13 282.101 130.838  23 
  -8   0  13-105.863 124.465  26 
  -8   0 -13 11.5012 44.4184  12 
   8   0  13 73.1494 113.033   9 
  -8   0  13 137.043 140.322  24 
  -8   0 -14 346.764 228.331  23 
  -8   0  14 133.350 154.236  26 
  -8   0  14 198.191 217.242  25 
  -8   0  14 278.677 124.617  14 
  -8   0  14 164.895 241.125  24 
  -8   0 -14 358.675 222.407  10 
  -8   0 -14 77.6460 79.9585  12 
   8   0  14 296.852 166.072   9 
  -8   0  14 306.075 217.418  17 
  -8   0  15 424.500 348.634  25 
  -8   0  15-124.359 98.5732  17 
  -8   0 -15 140.563 211.172  10 
   8   0  15 150.605 22.5465   9 
  -8   0  15-122.743 23.5784  26 
  -8   0  15 1.16127 52.5731  14 
  -8   0 -15 11.2648 109.395  12 
  -8   0  15 239.517 353.265  24 
  -8   0  16 176.386 115.504  14 
   8   0  16 142.012 105.386  15 
  -8   0  16 63.7264 157.795  17 
  -8   0 -16 88.7047 107.785  12 
  -8   0  16 312.161 302.652  26 
  -8   0  16-28.5014 182.842  24 
  -8   0  16 110.226 47.2430  25 
   8   0  16-47.8772 193.465   9 
  -8   0 -16 154.311 157.871  10 
   8   0  17-49.1883 147.628  15 
   8   0  17-12.0425 76.3943   9 
  -8   0  17-158.065 217.714  25 
  -8   0  17-110.512 35.0240  17 
  -8   0  17-122.666 73.9389  14 
  -8   0  17 36.7412 86.7532  26 
  -8   0  17-187.088 191.211  24 
  -8   0 -17-81.3309 160.569  10 
  -8   0  18 38.3382 85.1286  24 
  -8   0  18-32.6843 47.3744  26 
   8   0  18 54.8354 71.8530  15 
  -8   0  18 42.5885 28.3038  14 
  -8   0  18 187.212 98.2192  25 
   8   0  18-49.7930 70.0676   9 
  -8   0  18 60.0416 100.615  17 
  -8   0 -18 59.6715 99.5971  10 
   8   0  19 28.0355 111.750  15 
  -8   0  19 122.971 93.9065  26 
  -8   0  19-134.789 147.290  24 
  -8   0 -19 20.1808 62.8605  10 
   8   0  19 86.0298 66.6107   9 
  -8   0  19 255.757 236.563  25 
  -8   0  19-91.7553 133.640  17 
  -8   0  20 1933.59 367.110  26 
  -8   0  20 2349.71 445.788  25 
  -8   0 -20 1954.35 332.781  10 
  -8   0  20 2173.08 444.257  24 
   8   0  20 2399.11 371.591   9 
   8   0  20 2761.99 392.060  15 
  -8   0  21-28.8377 41.9330  25 
  -8   0  21 31.4864 71.2798  24 
  -9   0   0-20.0057 16.6942  10 
  -9   0   0-31.3521 32.2574  12 
  -9   0   0-28.5872 331.824   3 
  -9   0   0-385.264 531.778   2 
  -9   0   0-106.372 10.9773  27 
  -9   0   0 5.85055 56.2507  18 
  -9   0   1 80.8661 522.846   2 
  -9   0   1 189.045 514.901   3 
  -9   0   1 31.9577 112.117  27 
  -9   0  -1 80.8884 121.719  10 
  -9   0  -1 82.3010 165.230  27 
  -9   0   1 150.235 191.538  18 
  -9   0  -1 67.3044 305.948   3 
  -9   0  -1-145.989 134.288   2 
  -9   0   1-57.2205 45.4605  10 
  -9   0  -1-51.6780 139.391  18 
  -9   0  -1-10.3461 61.3071  12 
  -9   0  -2 705.726 229.926  12 
  -9   0  -2 1043.87 285.663  10 
  -9   0   2 594.796 628.462   3 
  -9   0   2 795.168 276.531  10 
  -9   0  -2 890.597 279.764  27 
  -9   0  -2 1117.45 519.362   1 
  -9   0  -2 898.335 380.977  18 
  -9   0  -2 397.363 684.818   2 
  -9   0  -2 1068.00 259.877  23 
  -9   0  -2 699.197 631.081   3 
  -9   0   2 331.533 323.982   2 
  -9   0   2 825.482 332.448  18 
  -9   0   3-25.7528 38.7422  10 
  -9   0   3-399.518 582.501   2 
  -9   0   3 74.7746 107.269  20 
  -9   0  -3-76.6177 74.2702  27 
  -9   0  -3 44.3516 89.6703  12 
  -9   0   3 12.7718 184.678  26 
  -9   0  -3 60.1562 179.437   3 
  -9   0   3 156.087 412.208   3 
  -9   0  -3 18.9393 155.631   1 
  -9   0  -3-9.57019 64.9571  10 
  -9   0  -3-84.0703 253.165   2 
  -9   0  -3-20.5579 89.5800  23 
  -9   0   3 85.9134 117.640  18 
  -9   0  -3-167.458 170.765  18 
  -9   0  -4 1098.10 269.422  10 
  -9   0  -4 922.703 343.167  18 
  -9   0   4 753.646 269.439  10 
  -9   0   4 904.816 316.695  26 
  -9   0   4 58.2314 461.894   2 
  -9   0  -4 1188.85 299.087  12 
  -9   0  -4 826.047 525.635   1 
  -9   0   4 812.239 260.467  20 
  -9   0  -4 1185.63 322.966  27 
  -9   0   4 1170.44 349.315  18 
  -9   0   4 698.029 803.542   3 
  -9   0  -4 1173.09 317.207  23 
  -9   0   5 160.676 1259.77   2 
  -9   0  -5-57.9952 168.431   1 
  -9   0   5 57.1757 10.5264  24 
  -9   0   5-294.261 446.423   3 
  -9   0  -5 52.7821 71.4042  12 
  -9   0  -5 15.3622 91.0082  27 
  -9   0   5-27.3864 125.285  20 
  -9   0   5 83.5143 109.857  18 
  -9   0  -5 71.5714 90.1785  10 
  -9   0  -5 92.0125 107.451  23 
  -9   0  -5 17.5642 172.943  18 
  -9   0   5 107.916 204.114  26 
  -9   0   6 5759.97 801.767  24 
  -9   0  -6 6905.08 722.232  10 
  -9   0  -6 7967.92 886.574  23 
  -9   0  -6 6958.97 1744.09   1 
  -9   0  -6 7161.55 1059.93  18 
  -9   0   6 5538.41 949.180  26 
  -9   0   6 6086.13 838.046  18 
  -9   0   6 6046.46 816.129  25 
  -9   0  -6 6357.50 821.656  27 
  -9   0  -6 6807.77 730.724  12 
  -9   0   6 6288.08 775.300  20 
  -9   0   7-30.5391 76.5054  18 
  -9   0   7-219.807 196.042  26 
  -9   0   7 33.1863 86.6425  25 
  -9   0   7 94.3380 172.331  20 
  -9   0  -7 157.852 201.856  27 
  -9   0  -7-10.3194 131.515  12 
  -9   0  -7-133.680 161.393  23 
  -9   0  -7-102.014 159.193   1 
  -9   0  -7 36.8410 34.5645  10 
  -9   0   7-174.496 189.945  24 
  -9   0  -7-10.4975 223.869  18 
  -9   0  -8 14908.1 2914.29   1 
  -9   0  -8 16015.7 1372.21  23 
  -9   0  -8 14726.0 1117.15  10 
  -9   0  -8 16594.3 1634.83  18 
  -9   0   8 13496.6 1339.73  25 
  -9   0   8 13066.4 1381.31  26 
  -9   0  -8 16503.6 1350.02  27 
  -9   0   8 13494.7 1172.91  20 
  -9   0   8 13811.4 1356.42  24 
  -9   0  -8 14409.7 1134.97  12 
  -9   0  -9 39.6376 54.1328  12 
  -9   0   9-91.7619 168.096  24 
  -9   0  -9-76.0814 241.051  18 
  -9   0  -9 25.5729 42.9748  10 
  -9   0  -9-8.30124 157.389  23 
  -9   0   9-161.837 245.264  25 
  -9   0   9-45.9716 125.023  20 
  -9   0   9-4.37070 66.9090  26 
  -9   0  10 207.800 54.7554  26 
  -9   0  10 152.744 106.344  17 
  -9   0 -10 125.322 141.337  10 
  -9   0  10-41.2888 89.7272  25 
  -9   0  10 235.613 306.633  24 
  -9   0 -10 174.586 100.747  12 
  -9   0  10 235.992 203.298  20 
  -9   0 -10 140.629 137.412  23 
  -9   0 -10 140.112 116.400  18 
  -9   0  11-154.926 273.800  26 
  -9   0  11 172.112 179.867  20 
  -9   0  11 33.1066 244.614  17 
  -9   0  11 80.6486 168.945  25 
   9   0  11-55.9247 140.269   9 
  -9   0  11-82.5022 165.431  24 
  -9   0 -11 75.0701 103.480  10 
  -9   0 -11 189.360 267.870  23 
  -9   0 -11-5.53842 109.975  12 
  -9   0 -12 3840.58 710.430  23 
  -9   0  12 2695.38 543.941  20 
  -9   0 -12 3204.16 551.344  12 
  -9   0  12 2576.20 537.329  17 
  -9   0 -12 3483.06 574.180  10 
  -9   0  12 2530.76 609.563  24 
   9   0  12 3415.93 576.401   9 
  -9   0  12 2807.30 677.756  25 
  -9   0  12 2597.97 606.341  26 
  -9   0 -13-276.934 215.312  23 
  -9   0 -13-34.5476 94.3510  12 
   9   0  13-174.229 160.079   9 
  -9   0  13-223.713 216.264  17 
  -9   0 -13-24.6645 49.0469  10 
  -9   0  13-52.0893 103.224  25 
  -9   0  13-66.4173 189.078  24 
  -9   0  13-143.384 217.228  26 
  -9   0  14 2974.41 539.367  17 
  -9   0  14 3638.54 738.090  25 
  -9   0 -14 4127.35 638.403  10 
  -9   0 -14 3730.48 591.254  12 
   9   0  14 3821.68 626.175   9 
  -9   0  14 3274.52 701.901  26 
  -9   0  14 3737.45 782.246  24 
  -9   0  15-155.641 25.0030  17 
  -9   0 -15-28.6570 77.5957  12 
  -9   0 -15 69.4357 98.1013  10 
  -9   0  15 123.833 191.531  25 
   9   0  15 36.6459 33.0769  15 
  -9   0  15-220.373 298.181  24 
   9   0  15 76.4913 68.3120   9 
  -9   0  15-236.180 225.564  26 
  -9   0  16 7329.95 1030.74  24 
  -9   0  16 6863.19 985.431  25 
  -9   0  16 5277.46 694.049  17 
   9   0  16 7547.51 823.828   9 
  -9   0 -16 7079.05 792.418  10 
   9   0  16 7566.70 828.537  15 
  -9   0  16 6538.20 856.134  26 
  -9   0 -16 7857.31 803.795  12 
  -9   0  17-271.806 214.056  25 
  -9   0  17-175.676 162.311  26 
  -9   0  17-121.756 81.8610  24 
   9   0  17 61.8556 97.4267   9 
   9   0  17 111.204 132.428  15 
  -9   0 -17 76.8302 78.0457  10 
  -9   0  18 3883.87 569.731  26 
  -9   0  18 4474.79 693.577  25 
  -9   0  18 4255.09 697.077  24 
   9   0  18 4699.58 599.177   9 
   9   0  18 5038.39 596.199  15 
  -9   0 -18 4038.69 548.535  10 
  -9   0  19-17.4710 111.023  25 
  -9   0 -19 8.02260 37.5536  10 
  -9   0  19 86.8549 150.497  24 
  -9   0  19-336.754 201.987  26 
   9   0  19 9.03664 124.604  15 
   9   0  19 74.6403 80.1317   9 
   9   0  20 504.101 162.961  15 
  -9   0  20 367.563 160.425  25 
  -9   0  20 431.151 193.772  24 
 -10   0   0 30233.2 5043.64   2 
 -10   0   0 30738.8 5228.09   3 
 -10   0   0 39896.8 1940.05  27 
 -10   0   0 39147.1 1849.14  10 
 -10   0   0 39476.6 2447.11  18 
 -10   0  -1-135.180 126.414  10 
 -10   0  -1-137.312 647.414   3 
 -10   0   1 403.142 604.927   3 
 -10   0   1 51.2907 115.020  10 
 -10   0   1 63.1866 174.507  27 
 -10   0   1-91.0649 283.221   2 
 -10   0   1 168.489 151.778  18 
 -10   0  -1-95.2742 108.726  27 
 -10   0  -1 3.11574 17.2087  18 
 -10   0  -1-56.9683 55.1319  12 
 -10   0  -1 256.081 570.610   2 
 -10   0   2 7721.24 828.620  10 
 -10   0  -2 7082.95 846.125  23 
 -10   0  -2 8832.15 1194.93  18 
 -10   0  -2 6660.65 2301.95   3 
 -10   0  -2 9725.96 945.479  10 
 -10   0  -2 6133.32 2204.65   2 
 -10   0   2 6161.68 2284.69   3 
 -10   0  -2 7018.20 791.729  12 
 -10   0  -2 7781.71 914.483  27 
 -10   0   2 7973.14 1065.42  18 
 -10   0   2 6099.73 2163.22   2 
 -10   0   3 94.2906 442.924   2 
 -10   0   3 140.507 399.154   3 
 -10   0  -3-131.191 78.1787  18 
 -10   0  -3-104.582 571.786   2 
 -10   0  -3-108.660 112.298  12 
 -10   0   3-209.233 219.093  20 
 -10   0   3 158.844 164.917  26 
 -10   0   3-56.0975 59.6036  10 
 -10   0  -3-17.5327 111.817   3 
 -10   0  -3 141.519 50.6507  23 
 -10   0   3 19.8091 94.7653  18 
 -10   0  -3 161.764 146.109  10 
 -10   0  -3-48.1468 96.9309  27 
 -10   0   4 77.4201 65.1642  10 
 -10   0   4-225.521 661.513   3 
 -10   0   4 665.950 905.309   2 
 -10   0  -4 171.012 131.730  10 
 -10   0  -4 183.643 119.109  27 
 -10   0  -4 373.416 189.589  23 
 -10   0  -4 97.5719 149.290  18 
 -10   0   4 326.647 242.481  18 
 -10   0   4 35.0078 102.303  26 
 -10   0  -4 234.008 164.392  12 
 -10   0   4 138.659 179.461  20 
 -10   0  -4 14.3572 249.450   3 
 -10   0  -4-83.0248 739.997   2 
 -10   0  -5 102.806 146.434  23 
 -10   0  -5 132.742 685.602   3 
 -10   0   5-6.32162 135.289  26 
 -10   0   5-18.4330 40.4351  20 
 -10   0   5-90.7364 182.995   3 
 -10   0   5 463.940 768.360   2 
 -10   0  -5-4.05057 40.6322  12 
 -10   0  -5 25.7482 126.451  18 
 -10   0  -5-4.28065 67.4381  10 
 -10   0  -5-480.740 510.994   2 
 -10   0   5 82.9749 139.783  18 
 -10   0  -5-5.02538 94.9726  27 
 -10   0   6 41595.8 2265.81  18 
 -10   0   6 41972.4 2142.26  20 
 -10   0  -6 52615.2 2485.04  27 
 -10   0   6 41976.4 2542.52  26 
 -10   0   6 38815.2 2085.99  25 
 -10   0  -6 45280.1 1983.51  10 
 -10   0  -6 47121.2 2323.11  23 
 -10   0   6 38099.2 2068.79  24 
 -10   0  -6 46171.3 2854.76  18 
 -10   0  -6 42032.0 1953.62  12 
 -10   0   7 327.002 324.894  26 
 -10   0  -7 81.4951 154.517  27 
 -10   0   7 283.104 199.145  20 
 -10   0  -7 190.522 207.973  23 
 -10   0  -7-22.2483 100.554  12 
 -10   0   7 72.4287 36.4991  24 
 -10   0   7-21.6270 28.4347  18 
 -10   0  -7 141.242 108.961  10 
 -10   0   7 192.223 215.213  25 
 -10   0  -7 103.279 139.329  18 
 -10   0   8 75201.3 3151.67  25 
 -10   0   8 76481.7 2943.73  20 
 -10   0  -8 78988.6 3704.05  18 
 -10   0  -8 82730.9 2821.34  12 
 -10   0   8 71038.6 3341.62  26 
 -10   0  -8 81031.9 2743.02  10 
 -10   0   8 74600.4 3145.26  24 
 -10   0  -8 86145.9 3388.36  23 
 -10   0  -9 17.2762 122.847  18 
 -10   0  -9 68.9281 223.736  23 
 -10   0   9-53.9345 56.4766  24 
 -10   0   9-58.6679 141.273  25 
 -10   0   9-116.150 115.829  20 
 -10   0   9 100.986 209.702  26 
 -10   0  -9 53.9474 72.1741  10 
 -10   0  -9-26.7515 150.657  12 
 -10   0  10 561.171 368.100  26 
 -10   0  10 517.776 154.437  25 
 -10   0 -10 553.536 197.427  12 
  10   0  10 543.190 204.181   9 
 -10   0 -10 586.036 238.346  23 
 -10   0  10 301.931 185.758  24 
 -10   0  10 369.761 175.436  20 
 -10   0 -10 626.933 248.943  10 
 -10   0 -10 692.649 345.512  18 
 -10   0 -11 49.7695 68.4118  10 
 -10   0  11 119.711 191.908  24 
  10   0  11 179.227 120.730   9 
 -10   0 -11 206.389 185.100  23 
 -10   0 -11-26.8021 19.1343  12 
 -10   0 -11-87.1737 85.4579  18 
 -10   0  11 85.2861 164.204  20 
 -10   0  11-219.343 211.202  26 
 -10   0  11-98.6955 136.983  25 
 -10   0  12 933.387 316.965  20 
  10   0  12 995.755 312.182   9 
 -10   0  12 1047.04 403.805  26 
 -10   0  12 657.006 249.832  24 
 -10   0  12 949.656 428.104  25 
 -10   0 -12 1303.04 357.217  12 
 -10   0 -12 1146.26 327.682  10 
 -10   0 -13 22.9714 24.8310  10 
 -10   0 -13-69.8799 114.971  12 
  10   0  13-16.9068 135.086   9 
 -10   0  13 142.915 309.278  26 
 -10   0  13 35.4642 91.3693  25 
 -10   0  13-139.660 188.707  24 
  10   0  14 36956.3 1799.61  15 
 -10   0  14 34734.9 2131.91  26 
  10   0  14 36746.5 1890.93   9 
 -10   0 -14 35744.4 1840.42  10 
 -10   0  14 33274.1 2240.20  24 
 -10   0  14 34320.9 2269.57  25 
 -10   0 -14 36482.0 1870.92  12 
 -10   0  15 43.2103 110.285  24 
  10   0  15 215.920 184.634   9 
 -10   0  15 31.3126 70.5228  26 
 -10   0  15 67.3509 173.099  25 
  10   0  15-98.2631 104.091  15 
 -10   0 -15 45.4955 80.1828  12 
 -10   0 -15 63.2196 145.521  10 
  10   0  16 9791.63 910.600   9 
 -10   0 -16 9672.02 834.721  12 
  10   0  16 9236.66 829.900  15 
 -10   0  16 8495.12 1030.16  25 
 -10   0 -16 9134.78 836.558  10 
 -10   0  16 6959.72 921.429  26 
 -10   0  16 8242.35 1018.39  24 
  10   0  17-4.86423 62.6397   9 
 -10   0  17 72.7409 120.487  26 
  10   0  17 6.06467 43.9523  15 
 -10   0  17 101.709 159.091  25 
 -10   0  17 43.5870 23.0490  24 
 -10   0 -17-43.0435 101.232  10 
 -10   0 -18 1355.40 254.402  10 
 -10   0  18 1831.56 440.407  25 
  10   0  18 1763.94 357.577   9 
  10   0  18 1945.41 349.628  15 
 -10   0  18 1404.52 326.427  26 
 -10   0  18 1400.24 388.335  24 
  10   0  19 115.144 100.793  15 
 -10   0  19-56.3072 41.8568  26 
 -10   0  19 210.011 168.553  25 
  10   0  19 14.0295 8.30181   9 
 -10   0  19 97.8370 117.171  24 
 -11   0   0 75.6749 71.9431  27 
 -11   0   0 134.728 466.034   3 
 -11   0   0-147.005 127.829   2 
 -11   0   0 127.034 113.338  18 
 -11   0   0-63.0791 119.753  10 
 -11   0   1 77.0666 91.0417  10 
 -11   0  -1-9.30448 49.5523  27 
 -11   0   1 38.8204 114.021  18 
 -11   0  -1 1055.08 1083.96   3 
 -11   0  -1-12.8029 47.1376  10 
 -11   0   1 267.392 576.122   2 
 -11   0  -1 238.274 409.127   2 
 -11   0  -1 10.3357 198.650  18 
 -11   0   1 349.726 662.250   3 
 -11   0   1-106.537 149.453  27 
 -11   0  -2 12471.8 1494.00  18 
 -11   0   2 11566.7 1090.63  10 
 -11   0  -2 7820.54 2795.65   3 
 -11   0   2 11090.2 1313.49  26 
 -11   0   2 9678.00 1070.85  20 
 -11   0  -2 12423.6 1197.99  27 
 -11   0  -2 13366.6 1173.78  10 
 -11   0   2 12558.8 1408.90  18 
 -11   0  -2 7923.42 2688.89   2 
 -11   0   3 15.4630 176.227  20 
 -11   0  -3 33.1052 106.740  27 
 -11   0  -3-88.0026 110.800  18 
 -11   0   3-114.640 95.1170  10 
 -11   0   3 430.065 277.472  18 
 -11   0   3-409.889 254.578  26 
 -11   0  -3 223.640 352.398   2 
 -11   0  -3 546.353 725.234   3 
 -11   0  -3-23.5437 62.7760  10 
 -11   0  -3-7.10176 108.754  12 
 -11   0  -4 58966.3 2541.60  23 
 -11   0   4 48050.7 2795.36  26 
 -11   0   4 50603.2 2731.34  18 
 -11   0  -4 62895.8 2585.87  10 
 -11   0   4 48120.7 2230.24  10 
 -11   0  -4 48932.4 2194.60  12 
 -11   0  -4 52211.4 2532.37  27 
 -11   0  -4 49827.5 3018.82  18 
 -11   0   4 41589.7 2302.89  20 
 -11   0   5 266.632 202.664  20 
 -11   0  -5-43.9321 92.5776  18 
 -11   0   5 7.63853 108.837  26 
 -11   0   5-82.4855 111.984  18 
 -11   0  -5 86.4209 78.1180  12 
 -11   0  -5 72.0068 129.861  27 
 -11   0  -5-151.467 128.736  23 
 -11   0  -5 0.77312 111.111  10 
 -11   0  -6 4579.32 710.669  12 
 -11   0  -6 5728.69 1014.86  18 
 -11   0  -6 5270.73 822.159  23 
 -11   0   6 4436.38 749.476  20 
 -11   0   6 4236.12 856.884  26 
 -11   0  -6 5556.43 806.921  27 
 -11   0  -6 5651.55 749.895  10 
 -11   0   6 4923.70 787.202  18 
 -11   0   7 70.7961 165.455  18 
 -11   0  -7 197.026 223.905  18 
 -11   0  -7 18.7441 73.7860  23 
 -11   0  -7-43.9199 88.3096  10 
 -11   0   7 128.874 188.173  24 
 -11   0   7 40.7193 226.667  26 
 -11   0  -7 21.9151 190.485  12 
 -11   0   7 76.9785 86.7256  25 
 -11   0   7-70.8470 75.6523  20 
 -11   0   8 16981.0 1473.70  25 
 -11   0  -8 20096.3 1401.69  12 
 -11   0   8 17776.3 1442.99  20 
 -11   0  -8 20108.9 1393.99  10 
 -11   0   8 17567.0 1735.89  26 
 -11   0  -8 19212.8 1832.70  18 
 -11   0  -8 20392.2 1630.91  23 
 -11   0   8 17017.5 1476.06  24 
 -11   0   9 85.1927 137.011  25 
 -11   0   9-249.948 208.709  20 
 -11   0  -9 91.3116 213.237  23 
 -11   0  -9-51.1912 138.426  18 
 -11   0   9-256.512 394.783  26 
 -11   0  -9-23.1849 44.8528  10 
 -11   0  -9-21.1365 41.4972  12 
 -11   0   9 368.513 306.348  24 
  11   0   9 75.2765 45.8353   9 
 -11   0 -10 4203.41 613.017  10 
  11   0  10 3699.90 582.528   9 
 -11   0 -10 4355.92 821.278  18 
 -11   0  10 3181.20 623.646  20 
 -11   0  10 3031.36 665.891  25 
 -11   0  10 3188.03 703.760  26 
 -11   0 -10 3969.61 621.515  12 
 -11   0  10 3120.16 651.137  24 
 -11   0 -11 52.7392 67.9311  12 
 -11   0  11-84.5723 75.7578  20 
 -11   0  11 42.1534 112.797  25 
 -11   0 -11 100.722 184.623  18 
  11   0  11 118.343 149.683  15 
 -11   0  11 200.591 166.716  24 
  11   0  11 57.6672 87.4870   9 
 -11   0  11-151.597 264.540  26 
 -11   0 -11-61.8817 113.991  10 
 -11   0  12 11492.1 1188.06  20 
 -11   0  12 11586.3 1259.65  24 
  11   0  12 12858.1 1008.64  15 
 -11   0  12 11844.6 1278.04  25 
 -11   0  12 11099.5 1272.98  26 
 -11   0 -12 13574.9 1145.52  12 
 -11   0 -12 14417.0 1134.22  10 
  11   0  12 12768.7 1125.18   9 
 -11   0  13 13.4590 134.903  24 
  11   0  13 66.6595 56.4783  15 
 -11   0  13-113.963 241.833  26 
  11   0  13-6.17643 44.3830   9 
 -11   0 -13 15.7658 107.337  10 
 -11   0  13 114.457 169.414  25 
 -11   0 -13-50.4800 125.315  12 
 -11   0  14 22981.5 1682.10  26 
  11   0  14 22518.4 1414.00   9 
 -11   0  14 22718.5 1733.75  25 
  11   0  14 23144.0 1361.21  15 
 -11   0 -14 26525.2 1514.83  12 
 -11   0 -14 25791.8 1465.85  10 
 -11   0  14 22390.3 1719.79  24 
 -11   0 -15 8.39959 66.4471  10 
  11   0  15-4.92466 113.041  15 
 -11   0  15-51.0105 122.151  24 
 -11   0  15 320.662 185.752  25 
 -11   0 -15-183.954 172.808  12 
  11   0  15 144.418 122.376   9 
 -11   0  15-124.151 131.452  26 
  11   0  16 55302.9 1947.71  15 
 -11   0  16 54049.7 2273.87  26 
 -11   0  16 51262.7 2350.46  24 
  11   0  16 56615.4 2133.46   9 
 -11   0  16 50702.2 2338.29  25 
 -11   0 -16 54802.0 1900.89  10 
 -11   0  17 50.1632 56.4392  24 
 -11   0  17 160.989 197.829  26 
  11   0  17-16.0207 29.4949   9 
  11   0  17-39.1583 119.062  15 
 -11   0  17-139.488 158.251  25 
  11   0  18 4921.99 526.148   9 
 -11   0  18 4238.54 560.011  25 
 -11   0  18 4017.47 558.164  24 
 -11   0  18 3713.59 500.812  26 
  11   0  18 5023.05 479.983  15 
 -12   0   0 61479.0 2618.36  10 
 -12   0   0 67852.9 3469.17  18 
 -12   0   0 64562.9 2664.72  27 
 -12   0   1 129.559 65.4833  26 
 -12   0  -1 46.1422 80.6897  18 
 -12   0   1-14.9774 37.7452  10 
 -12   0  -1-51.2706 73.8610  10 
 -12   0   1-5.53773 86.5098  20 
 -12   0   1-10.4190 109.878  18 
 -12   0  -1 14.6694 52.0825  27 
 -12   0   2 512.012 229.327  20 
 -12   0  -2 679.483 375.331  18 
 -12   0   2 702.848 311.591  18 
 -12   0  -2 932.921 331.765  27 
 -12   0  -2 660.454 281.015  10 
 -12   0   2 508.609 275.656  26 
 -12   0   2 579.667 269.972  10 
 -12   0  -3 56.3119 127.094  10 
 -12   0  -3 47.7487 46.8496  18 
 -12   0  -3 27.8955 74.8428  27 
 -12   0   3 185.262 200.545  20 
 -12   0   3 91.7733 119.376  10 
 -12   0   3 98.5343 81.0557  18 
 -12   0   3-243.376 249.098  26 
 -12   0   4 2945.70 696.808  18 
 -12   0   4 2316.48 651.115  26 
 -12   0   4 2910.61 616.628  20 
 -12   0  -4 3093.51 572.234  10 
 -12   0  -4 2816.21 755.489  18 
 -12   0   5 91.6025 74.7810  20 
 -12   0  -5 143.627 95.1107  18 
 -12   0   5 195.115 138.435  26 
 -12   0   5 102.597 116.255  18 
 -12   0  -5 30.5847 116.585  10 
 -12   0  -5 65.7154 92.7062  12 
 -12   0  -6 123890. 4836.09  18 
 -12   0  -6 124462. 3704.43  12 
 -12   0   6 118284. 3961.86  20 
 -12   0   6 113631. 4411.52  26 
 -12   0   6 127644. 4268.77  18 
 -12   0   7 140.184 86.2064  26 
  12   0   7 126.701 114.247   9 
 -12   0  -7 8.54205 95.6329  18 
 -12   0   7-183.006 137.851  20 
 -12   0  -7-2.88289 132.146  12 
 -12   0  -7 151.743 175.709  10 
 -12   0  -8 20658.8 1864.30  18 
 -12   0  -8 22352.2 1525.22  10 
 -12   0   8 16861.3 1474.43  20 
  12   0   8 18675.7 1343.59   9 
 -12   0   8 16638.7 1689.80  26 
 -12   0  -8 18777.1 1384.66  12 
 -12   0  -9 88.3379 170.451  12 
 -12   0   9 41.5102 82.5459  25 
 -12   0  -9 70.9490 209.884  18 
 -12   0   9-330.261 265.702  20 
 -12   0   9-223.368 279.234  26 
  12   0   9-102.967 99.3738   9 
 -12   0  -9 94.7420 154.558  10 
  12   0   9-83.9388 123.950  15 
 -12   0   9 50.3560 97.9962  24 
  12   0  10 135.049 108.742  15 
  12   0  10 157.799 70.3533   9 
 -12   0 -10 255.341 217.233  18 
 -12   0  10 159.886 181.836  25 
 -12   0 -10 356.591 232.494  10 
 -12   0  10 230.929 150.928  24 
 -12   0  10 361.311 255.560  20 
 -12   0  10 364.146 191.217  26 
 -12   0 -10 244.271 149.760  12 
 -12   0 -11 25.2886 59.8205  12 
 -12   0 -11-133.400 115.402  10 
 -12   0  11-24.6568 102.272  25 
  12   0  11 236.696 82.7775  15 
 -12   0  11 53.6989 199.889  24 
 -12   0  11-163.865 117.239  20 
 -12   0 -11 80.9835 192.444  18 
 -12   0  11 85.0552 69.4443  26 
  12   0  11 55.5451 105.288   9 
  12   0  12 7263.80 816.069   9 
 -12   0  12 5797.55 932.865  26 
 -12   0 -12 8414.17 850.374  10 
 -12   0  12 6352.44 877.815  24 
 -12   0  12 5804.70 777.394  20 
 -12   0  12 6214.97 884.843  25 
  12   0  12 6973.57 723.179  15 
 -12   0 -12 8346.10 868.446  12 
 -12   0 -13 110.531 111.544  12 
  12   0  13-62.1541 125.443  15 
 -12   0  13 42.9690 65.4762  26 
  12   0  13 38.0565 41.6715   9 
 -12   0  13 166.324 62.7901  25 
 -12   0  13 29.5012 119.254  24 
 -12   0 -13-52.0971 91.2355  10 
 -12   0  14 35956.2 1957.85  24 
 -12   0  14 35569.4 1956.80  25 
 -12   0  14 38032.1 2024.92  26 
 -12   0 -14 43638.8 1839.35  12 
 -12   0 -14 42839.6 1793.90  10 
  12   0  14 40000.0 1828.33   9 
  12   0  14 39421.5 1598.81  15 
 -12   0  15-140.864 131.223  25 
  12   0  15-135.176 116.125   9 
  12   0  15 138.713 96.8655  15 
 -12   0 -15-83.6884 80.5289  10 
 -12   0  15 97.5397 158.396  24 
 -12   0  15-5.35829 128.117  26 
 -12   0  16 1656.25 360.550  24 
 -12   0  16 1629.31 367.430  25 
  12   0  16 2270.97 347.755  15 
 -12   0  16 1877.94 395.275  26 
  12   0  16 2262.99 389.339   9 
 -12   0  17 151.340 91.8671  24 
  12   0  17 53.4556 76.3238  15 
 -12   0  17-49.9494 80.8573  25 
 -12   0  17-17.7224 106.470  26 
  12   0  17 68.2661 100.436   9 
 -13   0   0 196.451 275.680  26 
 -13   0   0-134.517 118.675  20 
 -13   0   0-18.4732 184.161  18 
 -13   0   0-42.9214 142.764  10 
 -13   0   1 133.717 28.4883  18 
 -13   0   1-3.28904 61.4919  10 
 -13   0  -1 213.813 259.066  26 
 -13   0   1-67.9690 43.1837  20 
 -13   0   1 468.770 408.255  26 
 -13   0  -1 259.153 218.055  18 
 -13   0  -1 169.024 210.353  10 
 -13   0   2 17224.4 1443.77  10 
 -13   0  -2 20396.5 1481.71  10 
 -13   0   2 19752.6 1850.33  18 
 -13   0   2 16382.2 1577.95  20 
 -13   0  -2 19667.4 1901.00  18 
 -13   0   2 16855.2 1758.42  26 
 -13   0   3-144.474 275.737  26 
 -13   0   3 261.356 218.041  18 
 -13   0  -3 98.3685 123.927  10 
 -13   0  -3-239.389 254.993  18 
 -13   0   3 23.2622 164.083  20 
 -13   0   4 27834.6 2196.05  26 
  13   0   4 30104.1 1643.70   9 
 -13   0  -4 31719.3 2483.19  18 
 -13   0   4 31904.5 2274.44  18 
 -13   0   4 28716.9 2025.52  20 
 -13   0  -4 33205.8 1887.74  10 
 -13   0   5 173.256 159.397  20 
 -13   0  -5-19.4375 102.765  10 
 -13   0   5 112.437 166.498  18 
 -13   0  -5-131.501 241.921  18 
  13   0   5-5.00518 105.415   9 
 -13   0   5-248.118 235.489  26 
 -13   0   6-5.06095 101.428  20 
 -13   0   6-33.5904 106.941  26 
 -13   0  -6 216.952 216.791  18 
 -13   0  -6 141.686 103.977  10 
  13   0   6 42.4232 10.1874   9 
 -13   0   7 4.93706 92.3034  26 
 -13   0  -7 110.851 113.903  18 
 -13   0  -7-127.947 137.092  10 
  13   0   7-21.0881 117.349   9 
 -13   0   7 12.8922 137.246  20 
  13   0   8 15553.4 1221.35   9 
 -13   0  -8 17533.9 1348.06  10 
 -13   0   8 12907.0 1446.44  26 
 -13   0   8 14119.1 1316.52  20 
 -13   0  -8 16950.0 1677.63  18 
 -13   0   9 115.072 247.633  26 
 -13   0  -9 49.4316 101.214  10 
 -13   0  -9 15.5619 73.3015  18 
 -13   0  -9-38.7573 143.586  12 
 -13   0   9 9.56791 86.6073  20 
  13   0   9-6.42043 55.8421   9 
 -13   0  10 20401.6 1676.20  26 
  13   0  10 22863.1 1447.03   9 
 -13   0  10 20535.1 1501.01  20 
 -13   0 -10 24071.3 1537.00  12 
 -13   0 -10 25171.0 1870.54  18 
  13   0  11 40.3218 68.8376   9 
 -13   0  11 90.3263 100.189  20 
 -13   0 -11 88.2852 26.1206  10 
 -13   0 -11-140.789 147.033  18 
 -13   0  11 206.630 226.803  26 
  13   0  12 6514.51 714.221   9 
 -13   0  12 4548.40 647.672  25 
 -13   0  12 4951.03 735.250  26 
 -13   0  12 4645.41 648.831  24 
 -13   0  13 339.957 261.460  26 
 -13   0  13-6.29128 82.9720  25 
 -13   0  13 88.9268 84.8129  24 
  13   0  13 50.2342 36.9978   9 
  13   0  13 105.760 119.229  15 
 -13   0 -13 25.1997 93.8685  10 
  13   0  14 12408.7 774.704  15 
 -13   0  14 9947.26 861.518  24 
 -13   0  14 10931.2 1003.56  26 
 -13   0  14 9761.46 850.971  25 
 -13   0  15-142.611 175.654  26 
  13   0  15-10.5938 77.7720   9 
  13   0  15 45.7666 57.5626  15 
 -13   0  15-34.3218 49.8444  25 
 -13   0  15 37.1609 66.8946  24 
  13   0  16 9983.11 724.261   9 
 -13   0  16 6205.64 647.267  26 
 -14   0   0 15821.0 1674.22  18 
 -14   0   0 13977.6 1305.49  10 
 -14   0   0 14453.0 1587.77  26 
 -14   0   0 13092.4 1392.95  20 
 -14   0   1-491.715 385.188  26 
 -14   0  -1-56.7641 154.209  18 
 -14   0  -1-156.696 90.8581  20 
 -14   0   1-55.5285 88.6054  18 
 -14   0  -1 67.3451 59.2837  10 
 -14   0   1 308.725 231.927  20 
 -14   0   1-9.19936 47.1430  10 
 -14   0  -1 481.026 350.113  26 
 -14   0   2 7015.25 1005.78  20 
 -14   0  -2 6620.97 1054.28  26 
 -14   0   2 6585.96 1083.58  26 
 -14   0   2 7507.07 1124.21  18 
 -14   0  -2 7227.12 1173.44  18 
 -14   0  -2 6161.18 871.930  10 
 -14   0   3 54.5318 88.9216  18 
 -14   0  -3 118.209 140.522  10 
 -14   0   3-152.611 95.9321  20 
 -14   0  -3 20.4512 78.7077  18 
  14   0   4 8948.44 859.948   9 
 -14   0  -4 9933.84 1028.19  10 
 -14   0  -4 10619.4 1393.39  18 
 -14   0   4 8692.76 1210.76  26 
 -14   0   4 9633.01 1250.83  18 
 -14   0   4 8748.95 1056.62  20 
 -14   0   5-239.688 171.615  20 
  14   0   5 81.5695 51.6487   9 
 -14   0  -5-64.9410 121.166  18 
 -14   0  -5 243.773 195.742  10 
 -14   0   5 260.556 202.885  26 
 -14   0  -6 38292.7 2536.99  18 
 -14   0   6 32454.4 2244.12  26 
  14   0   6 35386.0 1729.50   9 
 -14   0   6 32142.1 2060.92  20 
 -14   0  -6 36175.7 1921.41  10 
 -14   0  -7-69.2185 33.3118  10 
  14   0   7-157.261 147.715   9 
 -14   0  -7-134.110 179.578  18 
 -14   0   7-33.7236 188.830  26 
 -14   0   7 149.587 122.966  20 
 -14   0  -8 4901.20 646.526  10 
  14   0   8 4553.92 606.272   9 
 -14   0   8 3804.53 703.322  26 
 -14   0   8 3821.62 675.610  20 
 -14   0  -8 5084.26 862.719  18 
 -14   0   9 163.815 179.343  20 
 -14   0   9 49.6555 224.630  26 
  14   0   9-16.8315 122.955   9 
 -14   0  -9 75.3580 102.836  10 
 -14   0  -9 88.4638 92.8581  18 
 -14   0  10 10060.6 1020.58  20 
 -14   0 -10 12731.9 983.690  10 
 -14   0  10 9417.89 1073.76  26 
  14   0  10 11646.0 955.996   9 
 -14   0 -10 13424.5 1277.35  18 
 -14   0  11 60.3539 211.005  26 
 -14   0 -11 53.9824 65.1307  10 
  14   0  11 73.2683 89.6969   9 
 -14   0  11 72.3363 93.5555  20 
 -14   0  12 14721.1 1206.38  26 
  14   0  12 19978.0 1182.86   9 
 -14   0  13 34.3342 45.4686  26 
  14   0  13 33.2715 65.2978   9 
  14   0  14 4255.08 483.341   9 
 -14   0  14 2678.87 442.011  26 
  14   0  15 6.42113 55.8483   9 
 -15   0   0-28.0616 242.596  20 
 -15   0   0 58.5612 39.3066  18 
 -15   0   0-319.191 340.625  26 
 -15   0   1-257.500 220.954  20 
 -15   0  -1-174.753 243.960  26 
 -15   0   1 88.3818 266.460  26 
 -15   0  -1 48.0550 95.3746  10 
 -15   0   1 79.5286 183.467  18 
 -15   0  -1 224.528 186.740  20 
 -15   0  -1-0.64101 66.2354  18 
 -15   0   2 260.592 56.7773  26 
 -15   0  -2 43.7145 184.931  20 
 -15   0   2 15.2358 199.460  20 
 -15   0   2 136.241 136.945  18 
 -15   0  -2-58.5856 130.756  10 
 -15   0  -2 76.7238 249.695  26 
 -15   0  -2 251.420 154.692  18 
 -15   0  -3-47.3431 33.5987  10 
 -15   0   3 44.1428 52.7065  26 
 -15   0   3-219.018 127.220  20 
 -15   0  -3 199.264 190.978  18 
 -15   0  -3-86.0478 26.3976  20 
 -15   0   4 44760.7 2339.17  20 
 -15   0  -4 36505.3 2311.94  20 
 -15   0  -4 40382.6 2038.56  10 
 -15   0   4 41954.4 2450.95  26 
 -15   0   5-261.823 225.590  26 
 -15   0  -5 142.717 268.257  18 
 -15   0  -5 92.0413 80.9304  10 
 -15   0   5 159.315 138.892  20 
 -15   0   6-75.5175 197.185  20 
 -15   0   6 170.696 251.145  26 
 -15   0  -6-87.1446 55.1678  18 
  15   0   6 4.71235 50.5850   9 
 -15   0  -6 64.3973 21.4588  10 
 -15   0  -7-49.1027 63.1256  10 
  15   0   7-11.1679 39.8157   9 
 -15   0  -7-50.2760 146.317  18 
 -15   0   7-124.979 104.194  26 
 -15   0   7-215.520 233.807  20 
 -15   0   8 11557.9 1153.07  26 
 -15   0  -8 16028.4 1432.71  18 
 -15   0  -8 13218.7 1012.16  10 
 -15   0   8 13421.2 1136.23  20 
  15   0   8 13773.6 994.413   9 
 -15   0  -9 113.694 118.135  18 
  15   0   9 129.923 111.894   9 
 -15   0   9 99.4937 90.3017  20 
 -15   0   9 9.81448 113.014  26 
 -15   0  10 42942.9 1884.98  20 
 -15   0  10 49395.7 2148.90  26 
  15   0  11 117.796 134.419   9 
 -15   0  11 78.6168 120.410  26 
 -15   0  12 1520.81 351.906  26 
  15   0  12 2906.49 389.040   9 
  15   0  13 26.0722 42.4171   9 
 -16   0   0 3418.88 687.615  20 
 -16   0  -1 115.574 107.191  20 
 -16   0  -1 13.4743 90.8468  18 
 -16   0   1-81.5239 111.323  20 
 -16   0  -2 312.684 206.836  20 
 -16   0  -2 78.1798 192.614  18 
 -16   0   2 219.903 100.059  20 
 -16   0   2 52.8986 136.235  26 
 -16   0  -3-154.622 150.811  20 
 -16   0  -3 4.98306 74.9062  18 
 -16   0   3-77.5762 131.955  26 
 -16   0   3 199.603 250.882  20 
 -16   0  -4 339.553 213.296  18 
 -16   0   4 395.255 182.749  20 
 -16   0   4 143.586 43.0148  26 
 -16   0  -4 226.676 123.799  10 
 -16   0  -4 235.373 210.347  20 
 -16   0  -5 18.1668 15.3581  10 
 -16   0   5 27.5795 96.3785  20 
 -16   0   5-164.368 44.6669  26 
 -16   0  -5-50.8835 101.333  20 
 -16   0   6 14729.2 1210.97  26 
 -16   0   6 18913.3 1301.88  20 
 -16   0  -6 17054.5 1425.32  20 
 -16   0  -7 37.2302 27.3690  20 
 -16   0   7 145.881 143.164  20 
 -16   0   7-54.9956 126.911  26 
 -16   0   8 2307.24 419.102  20 
 -16   0  -8 3156.80 549.621  20 
 -16   0   8 1966.84 417.495  26 
 -16   0  -9 1.12330 174.258  20 
 -16   0   9-53.1006 102.176  26 
 -16   0   9-141.795 57.1335  20 
 -16   0 -10 2663.97 462.526  20 
 -17   0   0 202.337 164.624  20 
 -17   0  -1 171.302 145.375  20 
 -17   0   1-35.2192 33.6018  20 
 -17   0   2 10061.0 962.272  20 
 -17   0  -2 10434.0 1020.84  20 
 -17   0  -3 263.760 216.611  20 
 -17   0   3 305.372 171.579  20 
 -17   0   4 4034.71 565.201  20 
 -17   0  -4 4333.29 629.935  20 
 -17   0   5 186.280 139.862  20 
 -17   0  -5-3.29868 109.014  20 
 -17   0   6 63.3208 79.7031  20 
 -17   0  -6-17.5393 110.485  20 
 -17   0   7-9.12305 43.9724  20 
 -17   0  -7 166.497 115.306  20 
 -17   0  -8 7401.21 728.870  20 
 -18   0   0 19189.6 1139.03  20 
 -18   0   1 76.6209 117.031  20 
 -18   0  -1-292.722 138.391  20 
 -18   0  -2 9830.68 813.855  20 
 -18   0   2 8935.75 759.406  20 
 -18   0  -3 212.700 148.495  20 
   0   1   0-10.2542 44.2966   1 
   0  -1   0 60.3693 26.1320   1 
   0  -1  -1-24.1019 139.345   1 
   0  -1  -1 112.216 106.562   2 
   0   1   1-44.2658 74.2012   1 
   0   1   1 8.01669 68.0387   3 
   0  -1  -1 8.48858 58.6446   5 
   0   1  -1 24.3905 46.0325   1 
   0   1   1-16.8721 49.8640   2 
   0   1   1-41.1710 67.5481   5 
   0  -1  -1 109.323 107.470   3 
   0  -1   1 13.8350 41.4797   1 
   0  -1   2-14.4301 20.2517   1 
   0  -1   2 620.663 491.995   4 
   0   1   2 1.53243 117.482   5 
   0  -1  -2-10.4948 98.7089   2 
   0  -1  -2 47.4035 368.876   1 
   0   1   2-38.7711 214.496   1 
   0  -1  -2 186.254 118.879   3 
   0   1  -2 48.8439 124.725   1 
   0  -1  -3-198.700 399.009   1 
   0  -1   3-21.8765 281.723   4 
   0   1  -3-7.61151 65.0367   1 
   0  -1   3 32.5622 135.627   1 
   0   1   3 325.543 493.962   1 
   0  -1  -3 23.3343 103.928   2 
   0  -1  -3 2.78482 48.5264   3 
   0  -1  -3 62.2052 227.514   4 
   0  -1  -4-208.646 365.236   4 
   0   1  -4-73.9701 72.5778   4 
   0  -1   4 146.801 337.152   4 
   0  -1   4 47.8638 196.384   1 
   0  -1  -4 494.074 393.702   1 
   0   1  -4-45.9001 177.928   1 
   0   1   4 302.380 281.119   1 
   0  -1  -5-1.86567 259.322   1 
   0   1  -5 205.254 273.226   1 
   0  -1  -5-72.4326 403.173   4 
   0   1   5 220.414 339.826   1 
   0  -1   5-156.130 233.375   4 
   0  -1   5-208.617 247.868   1 
   0   1  -5-91.0428 491.667   4 
   0  -1   6 508.044 519.455   1 
   0  -1  -6-118.035 347.537   2 
   0   1  -6 396.114 366.397   1 
   0  -1   6 161.281 322.173   4 
   0  -1  -6-66.1847 492.445   1 
   0  -1  -6 24.4032 206.495   3 
   0  -1  -6 202.480 295.283   4 
   0   1  -6 260.129 271.192   4 
   0   1  -7-10.0774 185.167   1 
   0   1  -7 71.6229 151.403   4 
   0  -1  -7 505.083 611.164   4 
   0  -1  -7 254.619 367.051   1 
   0  -1  -8 160.551 509.186   4 
   0   1  -8 180.935 334.633   1 
   0   1  -8-240.641 639.426   4 
   0  -1  -8-307.348 514.795   1 
   0  -1  -9 48.1398 527.442   4 
   0   1  -9 25.2193 165.246   1 
   0  -1  -9 94.7680 704.825   1 
   0   1  -9 139.406 293.916   4 
   0  -1  10-9.24846 43.1924  14 
   0   1 -10 56.5244 286.513   1 
   0   1  10 69.6148 44.3280  14 
   0   1  10 36.8966 65.7648  17 
   0  -1 -10 466.886 1128.31   4 
   0  -1  10-24.2894 96.0916  17 
   0  -1 -10-142.632 276.658   1 
   0  -1  10 107.399 84.1311   6 
   0  -1  10-24.1463 83.8616  16 
   0  -1  10 35.7846 74.3566  26 
   0   1  10-65.7548 80.3270   6 
   0  -1 -11-233.987 230.243   1 
   0   1  11 55.3824 47.4243  14 
   0  -1  11 54.9004 43.6464  26 
   0   1  11-45.3105 75.8361  26 
   0   1  11 67.2877 121.862  17 
   0  -1  11 52.1789 78.5571  25 
   0  -1 -11-113.011 649.664   4 
   0   1 -11-269.790 465.520   1 
   0  -1 -11 109.107 122.114   7 
   0   1  11-32.7336 56.2817   6 
   0  -1  11 127.406 129.057  17 
   0  -1  11 55.4737 85.8931  24 
   0  -1  11 46.2356 76.7882  14 
   0  -1 -11 169.991 230.899  12 
   0   1  11 120.770 53.5141  25 
   0  -1  11 120.935 115.512  16 
   0   1  11-8.36862 116.353  24 
   0  -1  11-47.3381 24.2570   6 
   0  -1  12 32.7480 46.8051  26 
   0  -1 -12 11.1254 203.670  12 
   0  -1 -12-142.552 74.7513   1 
   0  -1  12 21.3319 109.317  17 
   0   1  12-38.7860 70.0167  14 
   0   1  12-139.326 100.728  24 
   0  -1  12-56.4195 72.8070  16 
   0  -1  12 62.1501 27.4445   9 
   0  -1  12-24.1880 87.8846   6 
   0   1  12-17.4628 38.6039  17 
   0  -1  12-69.0566 122.089  24 
   0  -1 -12 32.0584 90.1692   7 
   0  -1  12 7.70048 38.8924  14 
   0  -1 -12-62.9730 413.977   4 
   0   1 -12-237.196 405.559   1 
   0   1  12-4.94067 89.7877  26 
   0   1  12 3.00045 157.874  25 
   0   1  12 178.967 143.709   6 
   0  -1  12-62.1773 35.1214  25 
   0   1  13 38.8710 66.3655  14 
   0   1  13 16.9990 83.6421  24 
   0  -1  13 29.5633 70.4121   6 
   0  -1  13 56.0011 79.2743  14 
   0  -1  13 49.4882 65.7108  17 
   0  -1  13 0.72689 65.7880   9 
   0   1  13 81.7456 112.594   6 
   0  -1  13-192.152 165.656  25 
   0   1  13-146.652 164.135  26 
   0   1  13 5.65967 117.621  25 
   0   1 -13-74.7091 201.223   1 
   0  -1  13 125.848 80.4901  16 
   0  -1  13-46.6807 151.920  24 
   0  -1 -13-64.0415 214.925  12 
   0   1  13-6.50607 80.2684  17 
   0  -1  13-26.3255 118.751  26 
   0   1  14 48.0839 80.2018   6 
   0   1  14 93.2206 127.957  24 
   0  -1  14 21.3558 174.723  24 
   0  -1  14 41.6477 67.9822  17 
   0   1  14 242.500 215.975  17 
   0  -1  14 140.519 152.349  25 
   0   1 -14 164.273 112.555   1 
   0   1  14 131.348 119.522  25 
   0  -1  14 83.7698 83.8500  14 
   0   1  14-145.711 147.963  16 
   0  -1  14 66.7053 241.800  16 
   0  -1  14-77.7564 65.5030   6 
   0   1  14 103.672 152.368  26 
   0  -1 -14 108.260 274.385  12 
   0  -1  14 22.7180 20.6302  26 
   0  -1 -14 288.760 1051.76   1 
   0   1  14 18.3727 83.5864  14 
   0   1  15 122.880 95.2371   6 
   0  -1  15 10.7184 66.6270  25 
   0  -1  15 86.7425 107.383   6 
   0   1  15 101.192 95.2459  25 
   0   1  15-67.1567 99.8632  14 
   0  -1 -15 198.228 301.056  12 
   0  -1  15 107.847 121.911  17 
   0  -1  15 56.3121 157.636  24 
   0   1  15 44.3673 144.859  24 
   0   1  15 43.7361 116.221  16 
   0   1  15-128.165 173.259  17 
   0  -1  15-76.9560 141.482  14 
   0   1  15 121.784 73.4919  26 
   0  -1  15 101.055 172.493  16 
   0  -1  15 112.471 108.807  15 
   0  -1  16 13.7963 95.7032   6 
   0  -1  16-96.5732 11.4292  15 
   0   1  16 49.9745 126.578   6 
   0   1  16 161.460 209.272  17 
   0  -1 -16 34.2725 78.8720  12 
   0   1  16 68.1661 198.798  24 
   0  -1  16 169.134 198.562  16 
   0  -1  16-14.4726 151.432  25 
   0  -1  16-171.952 156.177  17 
   0   1  16 300.966 231.653  16 
   0  -1  16 184.813 187.105  14 
   0   1  16 99.9472 154.594  14 
   0   1  16-17.4566 130.231  25 
   0  -1  16 47.0473 114.981  24 
   0   1  17-35.4402 202.635  16 
   0  -1  17 2.17956 110.550  24 
   0   1  17-68.1305 67.6685  17 
   0  -1  17 33.8675 103.945   6 
   0   1  17-15.6099 91.3403  14 
   0   1  17-0.44392 123.611  24 
   0   1  17 106.715 33.1145  25 
   0  -1 -17-123.689 206.115  12 
   0  -1  17-0.68871 117.884  14 
   0  -1  17 35.5430 113.141  16 
   0  -1  17 29.1999 33.0486  17 
   0  -1  17-84.3744 175.427  25 
   0  -1  17 52.5109 80.5120  15 
   0   1  17-90.7246 68.3806   6 
   0  -1  18 97.2794 91.5468  15 
   0  -1  18 193.559 189.886  25 
   0  -1  18-182.932 141.625  14 
   0   1  18 180.128 191.830  14 
   0   1  18-42.0515 26.2929  24 
   0   1  18 28.1221 78.0318  16 
   0  -1 -18-78.2947 195.539  12 
   0  -1  18-116.848 183.491  16 
   0   1  18-41.5346 127.814  25 
   0  -1  18-76.3874 84.4668  24 
   0   1  18 73.2536 97.3178  15 
   0   1  18-52.5505 123.203  17 
   0  -1  18-20.0573 170.079  17 
   0   1  18 117.376 154.896   6 
   0   1  19-46.7234 72.1849   6 
   0  -1  19-57.7218 123.964  14 
   0  -1  19-66.7473 140.533  16 
   0   1  19 25.0575 79.4433  17 
   0  -1  19-122.202 126.249  24 
   0  -1  19-161.351 242.487  17 
   0   1  19 80.2055 139.868  16 
   0  -1  19 26.8450 78.6638  25 
   0   1  19-89.1826 90.9018  14 
   0   1  20 93.5295 167.337  14 
   0  -1  20-147.574 165.829  17 
   0  -1  20-214.758 155.472  16 
   0   1  20 149.022 170.868  16 
   0  -1  20 59.4760 144.433  21 
   0   1  20 147.530 101.426  17 
   0  -1  20-67.6617 96.8010  14 
   0   1 -20-64.9806 80.1408  10 
   0   1  20 7.64726 73.6429   6 
   0  -1 -21-37.1574 135.168  10 
   0   1  21-171.177 134.992  14 
   0   1  21-95.9121 74.7155  16 
   0  -1  21 212.635 169.594  17 
   0   1 -21 32.1328 45.7708  10 
   0  -1  21-57.1258 98.8485  16 
   0   1  21 188.342 176.990  17 
   0  -1  21 17.8280 95.8102  14 
   0  -1  21 60.0964 74.3067  21 
   0   1  22-4.10347 20.6895  16 
   0  -1  22 4.85966 53.2448  16 
   0   1  22 148.276 129.082  14 
   0   1  22 181.182 122.728  17 
   0   1 -22 36.3991 70.9793  10 
   0   1  22-51.4606 149.089  21 
   0  -1 -22-3.20404 139.615  10 
   0  -1  22-95.4947 82.5126  14 
   0  -1  22-273.880 210.984  21 
   0   1  23 97.0208 93.0542  21 
   0  -1 -23 68.2939 87.6483  10 
   0   1  23 0.96277 77.4311  16 
   0  -1  23-31.9375 22.1387  14 
   0   1 -23 4.16357 74.3710  10 
   0   1  23 53.4941 34.5880  14 
   0  -1  23 52.0666 16.5861  16 
   0  -1  23 1.89340 92.6381  21 
  -1  -1   0-19.2105 16.6534   1 
  -1  -1   0 12.4724 56.3366   2 
  -1  -1   0 10.8465 106.977   5 
  -1  -1   0 3.13095 158.182   4 
   1  -1   0 27.0102 28.6013   1 
   1   1   0 37.5856 24.1038   2 
   1   1   0 13.1522 71.8931   4 
   1   1   0 20.0002 22.2876   3 
   1   1   0-10.9112 55.7264   1 
   1   1   0-3.04791 96.6206   5 
  -1  -1   0-20.8298 9.00147   3 
  -1   1   0 2.90662 29.6338   1 
   1   1  -1 9332.88 822.109   3 
  -1   1   1 7864.94 899.265   3 
  -1  -1  -1 9362.70 1276.70   1 
   1   1   1 9566.98 1238.29   1 
   1   1   1 7681.04 1132.70   4 
  -1  -1  -1 8990.03 1246.77   4 
  -1  -1   1 6899.53 696.517   4 
  -1  -1   1 7768.42 849.231   5 
   1  -1  -1 8242.43 1000.48   1 
   1   1  -1 9473.10 821.966   2 
   1   1   1 8384.21 1007.90   5 
  -1   1  -1 8299.64 753.630   1 
  -1   1   1 7762.64 863.088   2 
   1  -1   1 8145.41 731.743   1 
  -1   1   1 8256.94 960.468   1 
  -1   1   2 8736.58 1026.10   3 
  -1   1  -2 9987.17 972.499   1 
  -1   1   2 9873.57 1292.84   1 
   1  -1   2 7166.65 893.891   1 
   1  -1  -2 9657.05 1341.35   1 
  -1   1   2 8534.78 996.961   2 
   1  -1  -2 9094.25 1100.52   3 
   1  -1  -2 9135.43 1077.34   2 
  -1  -1  -2 11405.1 1664.02   1 
  -1  -1  -2 10139.8 1594.48   4 
   1   1   2 9641.01 1484.37   4 
   1   1   2 11238.5 1742.25   1 
   1   1  -2 8787.49 635.900   1 
  -1  -1   2 8332.07 786.435   1 
   1  -1   2 13352.3 1953.51   4 
   1  -1  -3 31607.6 3143.93   1 
  -1   1  -3 32319.3 2115.52   1 
  -1  -1  -3 31892.5 3189.13   4 
   1  -1  -3 29739.6 2271.92   3 
  -1   1   3 28297.2 2793.76   1 
   1  -1   3 30867.6 2309.34   1 
   1   1   3 27871.5 2864.94   4 
   1   1  -3 29409.3 1669.67   1 
  -1   1   3 32589.2 2234.87   3 
  -1   1   3 35218.7 2272.95   2 
  -1  -1   3 21721.6 1902.60   1 
   1  -1   3 32060.7 3483.31   4 
   1  -1  -3 28897.3 2192.73   2 
   1   1   3 31512.5 3449.53   1 
  -1  -1  -3 29474.8 3167.62   1 
   1  -1   4 66196.7 5603.51   4 
  -1  -1   4 45612.2 3523.12   1 
   1   1   4 70014.6 5772.43   1 
   1   1  -4 62704.8 3057.38   1 
  -1   1   4 71368.1 4920.50   1 
   1  -1  -4 63924.0 3722.80   3 
   1  -1   4 67762.5 4241.12   1 
   1   1  -4 76894.6 3428.93   4 
  -1   1  -4 71909.0 3697.39   1 
   1  -1  -4 62705.5 3624.75   2 
   1   1   4 67705.9 4898.90   4 
  -1  -1  -4 72193.0 5772.57   4 
  -1  -1  -4 55254.4 4871.33   1 
   1  -1  -4 70244.8 5593.72   1 
   1  -1   5 23446.3 3242.64   1 
   1  -1  -5 31936.5 2839.32   2 
   1   1   5 27327.4 4382.93   1 
   1   1  -5 35411.5 2922.88   4 
   1  -1   5 31112.1 3778.68   4 
  -1  -1   5 18060.2 2698.78   1 
  -1  -1  -5 30658.6 3940.83   1 
   1  -1  -5 29011.4 3976.28   1 
  -1   1   5 31622.4 3822.25   1 
   1  -1  -5 36410.2 3492.76   4 
  -1  -1  -5 27392.0 4226.97   4 
   1   1  -5 29171.4 2482.23   1 
   1  -1  -5 31273.9 2876.09   3 
  -1   1  -5 46311.9 4985.74   4 
  -1   1  -5 32953.8 2778.18   1 
   1   1  -6 319.511 251.243   4 
   1  -1  -6 213.774 96.4044   4 
  -1  -1  -6 454.239 473.432   1 
   1  -1   6 177.523 174.698   4 
  -1   1   6-61.2197 166.612   1 
   1  -1  -6 422.570 583.360   1 
   1  -1  -6 255.304 306.249   3 
  -1   1  -6 704.708 735.637   4 
  -1   1  -6 404.435 438.249   1 
   1   1  -6 679.514 471.217   1 
   1  -1  -6 501.087 428.149   2 
  -1  -1  -6-205.145 613.662   4 
  -1  -1   6 283.128 341.972   1 
   1  -1   7 1118.16 860.277   4 
   1   1  -7 1919.38 802.133   1 
  -1  -1  -7 1868.02 1300.78   4 
   1   1  -7 1940.83 880.419   4 
  -1  -1  -7 1917.79 981.062   1 
   1  -1  -7 1712.40 959.386   4 
  -1  -1   7 986.793 949.573   1 
   1  -1  -7 1953.10 1263.98   1 
  -1   1  -7 3230.35 1472.18   4 
  -1   1  -7 1845.04 768.443   1 
   1  -1  -8 1671.75 1054.98   1 
   1  -1   8 2442.83 1110.31   4 
  -1   1  -8 2810.18 1082.52   1 
   1   1  -8 3343.76 1108.74   1 
  -1  -1  -8 3093.27 1853.98   4 
   1   1  -8 3013.67 1256.13   4 
  -1  -1  -8 3181.50 1413.06   1 
   1  -1  -8 2433.07 1254.50   4 
  -1   1  -8 4693.43 2172.41   4 
  -1  -1  -9 4729.80 1806.03   1 
  -1   1  -9 7603.56 2786.88   4 
   1   1  -9 5520.44 1698.22   4 
  -1   1  -9 5712.83 1620.59   1 
  -1  -1  -9 3663.18 2161.60   4 
   1  -1  -9 4075.68 1801.82   1 
   1   1  -9 4070.82 1303.52   1 
   1  -1  -9 3479.87 1566.26   4 
   1  -1  10 1244.13 302.020  17 
  -1  -1  10 1179.92 317.219  24 
   1   1  10 1107.79 242.222  14 
   1  -1 -10 1027.81 1486.58   4 
  -1   1  10 1210.00 241.416  14 
  -1   1  10 1221.06 269.100   6 
   1   1 -10 952.485 703.367   1 
  -1   1  10 1431.18 280.752  26 
  -1  -1 -10 570.494 2552.38   4 
   1  -1  10 1308.58 239.823   6 
  -1  -1 -10 737.655 769.703   1 
  -1   1 -10 892.012 650.180   1 
   1  -1 -10 860.084 1043.59   1 
   1  -1  10 1083.29 228.569  14 
  -1  -1  10 1150.09 222.601   6 
   1   1  10 1426.94 304.443  17 
   1  -1  10 1236.82 248.202  26 
  -1  -1  10 1334.89 279.477  26 
  -1  -1  10 1077.36 267.601  17 
  -1  -1  10 1082.62 217.791  14 
  -1  -1  10 1016.84 357.043  16 
   1   1  10 1223.25 246.936   6 
  -1   1  10 1264.51 325.986  17 
   1  -1  10 1176.32 360.973  16 
  -1  -1  10 1085.53 292.427  25 
  -1   1  11 1.23308 21.4242  17 
   1  -1 -11-184.272 512.575   1 
   1  -1  11 26.9293 85.1030   6 
   1  -1  11 103.881 152.489  16 
  -1  -1  11-1.01513 52.8940  14 
  -1  -1 -11-146.368 530.368   1 
   1  -1 -11 668.556 938.404   4 
   1   1  11 5.76140 7.60758  14 
  -1  -1  11 77.7184 144.236  24 
  -1  -1  11-31.7172 49.1469  16 
   1   1 -11 117.174 193.265   1 
  -1   1  11 52.9915 85.5147  26 
  -1   1 -11-106.495 291.702   1 
  -1  -1  11 41.0912 45.9698   6 
   1  -1  11-14.0236 111.025  17 
   1   1  11 173.090 122.551  26 
   1  -1  11-30.8067 51.8332  26 
  -1  -1  11 28.2471 57.8684  17 
  -1   1  11 42.7745 100.204   6 
  -1  -1 -11-56.1530 140.683   4 
   1   1  11-81.2131 124.198  17 
   1   1  11 44.1184 45.0978   6 
  -1   1  11 193.659 120.458  14 
  -1  -1  11-54.6678 52.7620  26 
   1  -1 -11 32.7075 108.012  12 
  -1   1  11 24.6145 125.056  25 
   1  -1  11-11.2296 88.9000  25 
  -1  -1 -11-79.2141 65.2107  12 
  -1   1  11 10.6344 41.9538  24 
  -1  -1  11 58.9809 44.4293  25 
   1  -1  11 21.2313 59.8304  14 
   1  -1  11 14.6061 54.7344   9 
   1  -1  11 68.9904 114.866  24 
  -1  -1 -12 31260.6 5325.40   1 
   1  -1  12 35425.5 1769.56  17 
   1   1 -12 32184.1 4334.27   1 
   1   1  12 30887.4 1677.01  25 
   1   1  12 31220.5 1683.36  24 
  -1   1  12 37947.8 1517.13   6 
   1  -1  12 33015.6 1397.63  14 
   1  -1 -12 33465.2 1517.52   7 
   1   1  12 37241.8 1516.25   6 
  -1   1 -12 32459.8 4573.11   1 
   1  -1  12 34500.3 1455.06   9 
  -1  -1  12 36470.8 1780.69  17 
  -1   1  12 33645.4 1896.53  25 
   1   1  12 38468.1 1574.64  26 
  -1  -1  12 38790.4 1731.71  26 
   1  -1  12 33095.9 1675.24  24 
   1  -1  12 39993.3 1679.46  26 
  -1   1  12 33394.2 1890.29  24 
  -1  -1  12 36633.1 1466.60   6 
   1   1  12 36877.5 1766.38  17 
  -1  -1  12 33762.6 1427.90  14 
   1  -1  12 36682.5 2098.09  16 
  -1   1  12 34822.2 1460.09  14 
  -1  -1  12 34493.0 1873.21  25 
  -1  -1 -12 31504.5 7563.31   4 
  -1   1  12 38178.2 1687.04  26 
   1  -1  12 32950.2 1674.19  25 
   1  -1 -12 28919.9 5064.45   1 
  -1   1  12 35853.5 1810.88  17 
   1  -1 -12 22805.1 5833.21   4 
  -1  -1  12 34803.8 1886.18  24 
   1   1  12 34370.7 1450.97  14 
  -1  -1 -12 31876.8 2393.11  12 
   1  -1 -12 28306.2 2454.03  12 
   1  -1  12 36878.7 1473.81   6 
  -1  -1  12 36215.7 2120.90  16 
  -1  -1  13 4343.96 691.950  24 
   1   1  13 3870.03 750.699  16 
   1  -1  13 4099.00 521.448  14 
  -1   1  13 4502.53 677.899  17 
   1  -1 -13 3391.34 564.400   7 
   1   1  13 3817.78 591.091  25 
   1  -1 -13 2795.42 821.550  12 
  -1   1  13 4188.78 574.836  26 
  -1  -1  13 4214.05 645.146  17 
  -1  -1  13 4256.98 530.364  14 
   1  -1  13 4277.89 640.212  17 
   1  -1  13 3606.12 503.284   9 
  -1   1  13 3635.79 647.637  24 
  -1  -1 -13 2727.70 1578.31   1 
   1  -1  13 3913.40 588.841  25 
  -1   1  13 4046.54 522.639  14 
  -1   1  13 4034.53 669.159  25 
   1   1  13 4092.07 618.651  24 
  -1  -1  13 3966.30 760.065  16 
   1   1  13 4024.49 524.280  14 
   1   1  13 4101.78 617.476  17 
   1  -1  13 4283.75 525.908   6 
  -1  -1 -13 3141.21 841.073  12 
  -1  -1 -13 3082.42 2606.99   4 
   1  -1 -13 2678.38 1685.81   1 
  -1  -1  13 4496.50 528.740   6 
  -1  -1  13 3254.64 482.093  15 
  -1  -1  13 4575.10 621.489  26 
  -1   1 -13 3432.48 1572.81   1 
   1   1  13 4596.16 558.594  26 
  -1   1  13 4387.23 541.324   6 
   1   1  13 4242.08 531.939   6 
   1  -1  13 3770.19 695.203  16 
   1   1 -13 3911.02 1559.28   1 
   1  -1  13 3789.18 582.461  24 
  -1  -1  13 4297.23 680.289  25 
   1  -1 -14 659.838 336.740  12 
  -1   1  14 448.903 216.436  25 
  -1  -1  14 342.136 161.199  15 
   1  -1  14 466.077 259.974  17 
   1   1  14 480.563 209.232   6 
   1  -1  14 501.900 156.811  14 
   1  -1  14 395.710 168.201  24 
  -1  -1  14 626.635 218.129   6 
   1  -1  14 398.643 312.259  16 
  -1  -1  14 591.715 326.523  24 
  -1  -1  14 718.983 245.506  26 
  -1   1  14 645.808 255.412  17 
  -1  -1  14 736.188 268.035  17 
   1   1  14 583.042 224.143  14 
   1  -1  14 614.487 197.040   6 
   1   1  14 461.051 231.546  24 
  -1   1  14 431.344 155.978  26 
   1  -1  14 465.301 232.236  25 
   1   1  14 467.288 178.754  17 
  -1   1  14 369.936 145.744  14 
  -1  -1  14 693.548 276.521  25 
  -1  -1  14 507.382 299.843  16 
   1  -1 -14-76.4483 681.845   1 
  -1  -1  14 612.828 214.970  14 
   1   1  14 499.015 258.213  25 
  -1   1  14 635.878 376.020  16 
  -1  -1 -14 441.478 318.493  12 
  -1   1  14 500.736 267.403  24 
  -1   1  14 499.949 203.272   6 
   1   1 -14 530.970 584.302   1 
  -1  -1 -14-44.9876 790.729   1 
   1   1  14 407.582 226.164  16 
   1  -1  14 451.481 196.836   9 
  -1   1 -14 517.149 686.942   1 
  -1   1  15 1879.78 471.282  25 
  -1  -1  15 1695.29 546.225  16 
   1  -1 -15 1129.22 469.886  12 
   1  -1  15 1898.36 425.773  25 
  -1   1  15 1516.64 482.111  16 
  -1  -1  15 1644.16 449.656  17 
   1   1  15 1710.93 559.742  16 
   1   1  15 1780.97 424.412  25 
  -1  -1 -15 1793.05 645.097  12 
   1   1  15 1991.41 420.208   6 
   1   1  15 1776.88 430.316  24 
   1   1  15 2053.56 401.834  14 
  -1  -1  15 1642.21 348.588  15 
   1   1  15 1502.02 411.409  17 
  -1  -1  15 1835.25 480.024  25 
   1  -1  15 1851.96 509.766  16 
  -1   1  15 1823.72 483.604  24 
   1  -1  15 2042.67 419.623  14 
   1  -1  15 1593.39 384.276  24 
  -1   1  15 1437.60 460.404  17 
   1  -1  15 1529.19 391.016   9 
   1  -1  15 1881.65 505.216  17 
  -1  -1  15 2123.46 421.568  14 
  -1   1  15 1920.91 363.408  14 
  -1  -1  15 2067.13 382.659   6 
  -1   1  15 1843.89 371.534   6 
  -1  -1  15 1509.91 408.903  24 
  -1  -1  15 1921.16 449.141  26 
  -1   1  15 1899.13 409.732  26 
   1  -1  15 2034.73 391.867   6 
  -1   1  16 223.231 199.311  17 
  -1   1  16 238.257 217.391  25 
  -1  -1  16 92.0603 67.5175  25 
   1  -1  16-12.0893 61.7299   9 
  -1  -1  16 21.2868 49.4639  14 
   1  -1  16 212.168 186.435  17 
   1   1  16 172.710 52.0192  14 
   1   1  16-24.4359 139.859  16 
   1   1  16 64.4807 173.862  17 
  -1   1  16-192.030 206.510  16 
   1  -1  16 86.9823 84.0893   6 
   1  -1  16 51.6744 129.128  14 
  -1  -1  16 275.590 201.253   6 
  -1  -1 -16 134.969 169.227  12 
   1  -1  16 83.6570 65.9540  15 
  -1  -1  16 480.990 350.933  16 
  -1  -1  16 149.575 189.097  17 
  -1   1  16-125.889 202.847  26 
  -1  -1  16 189.924 179.134  24 
   1   1  16 59.6968 69.2337   6 
  -1   1  16 131.571 80.6095  14 
  -1   1  16 258.795 148.158  24 
   1  -1 -16 23.3613 223.828  12 
   1  -1  16 45.8406 147.533  25 
   1  -1  16 176.850 136.559  24 
  -1  -1  16 250.240 141.088  26 
  -1   1  16 128.504 76.0131   6 
   1  -1  16-54.0886 204.635  16 
   1  -1 -17-6.04877 111.795  12 
   1  -1  17 84.8021 91.6356  15 
  -1  -1  17 31.2623 163.838  17 
  -1   1  17 89.8606 95.3970  16 
   1   1  17-57.1844 224.677  16 
  -1  -1  17-60.8881 123.731  24 
  -1   1  17 126.158 204.838  17 
   1  -1  17 97.2962 65.2910  25 
  -1   1  17 24.9336 34.0088  14 
  -1  -1 -17-104.510 47.0825  12 
  -1   1  17-139.747 185.996  25 
  -1  -1  17 110.826 136.941   6 
   1   1  17-314.288 296.667  17 
   1  -1  17 150.395 173.221  17 
   1   1  17 158.311 149.632  14 
   1   1  17 87.8264 104.498   6 
   1  -1  17-103.332 140.710  16 
   1  -1  17 44.4467 64.1003  24 
  -1  -1  17-38.7336 117.375  25 
  -1  -1  17 238.650 179.402  14 
  -1   1  17 82.4935 137.847   6 
  -1  -1  17 151.323 231.472  16 
  -1   1  17 50.6047 170.185  24 
   1  -1  17 10.7229 125.752   6 
   1  -1  17-30.6138 138.589  14 
  -1  -1 -18-117.793 164.722  12 
   1  -1  18 80.7879 130.827  15 
  -1   1  18 62.9642 127.106  14 
  -1  -1  18 155.238 135.225  25 
   1   1  18 162.361 111.587  14 
  -1   1  18 13.1417 149.268  16 
   1   1  18 256.977 186.362   6 
  -1  -1  18 216.270 281.689  16 
  -1  -1  18 221.592 118.197  14 
  -1   1  18 115.674 132.175   6 
   1  -1 -18 132.445 260.150  12 
  -1  -1  18-0.46870 137.187  17 
   1   1  18 34.5135 190.607  17 
   1  -1  18 108.850 9.86084  16 
  -1   1  18 150.804 34.3254  25 
  -1  -1  18 287.262 246.844  24 
   1  -1  18 33.2905 122.694  17 
   1   1  18 162.988 283.504  16 
  -1   1  18 99.3829 168.427  24 
  -1   1  18 44.8378 76.6697  17 
   1  -1  18-13.8378 21.3625  14 
   1  -1  19 1831.33 454.372  17 
  -1  -1  19 1405.38 400.747  24 
  -1   1  19 1598.46 390.708  14 
   1  -1  19 1941.67 383.500  15 
  -1  -1  19 1381.42 507.393  16 
  -1   1  19 1725.05 572.211  16 
  -1   1  19 1518.96 393.290  17 
   1   1  19 1459.92 360.515  15 
   1  -1  19 2016.50 438.957  14 
  -1  -1  19 1767.72 554.298  21 
  -1  -1  19 1850.15 463.919  17 
   1  -1  19 1681.90 500.530  16 
  -1   1  19 1672.88 425.155  25 
  -1  -1  19 1714.78 424.755  25 
  -1   1 -19 1555.84 479.056  10 
   1   1  19 1796.54 384.176   6 
   1   1  19 1416.32 484.257  16 
  -1   1  19 1847.51 454.617  24 
  -1  -1  19 1878.55 464.481  14 
   1   1  19 1947.88 405.982  14 
  -1   1  19 1979.13 425.595   6 
   1   1  19 1593.01 403.433  17 
   1  -1  20 3750.61 632.280  17 
  -1   1  20 4110.42 667.177  17 
  -1  -1 -20 2743.84 619.874  10 
  -1   1  20 3559.16 572.138  25 
   1   1  20 4273.86 575.108   6 
   1   1  20 3871.77 764.547  16 
  -1   1  20 3524.97 561.430  24 
   1  -1  20 4344.62 533.673  15 
  -1  -1  20 4077.59 613.372  14 
  -1  -1  20 3871.38 644.406  17 
  -1  -1  20 3946.82 818.704  16 
  -1   1  20 4607.95 598.942   6 
  -1   1 -20 2679.36 672.081  10 
   1   1  20 4565.74 591.771  14 
  -1   1  20 4043.45 582.424  14 
  -1  -1  20 3450.94 545.371  24 
  -1  -1  20 3624.48 573.149  25 
   1   1  20 4094.79 532.424  15 
  -1   1  20 3698.41 758.572  16 
   1  -1  20 3645.17 725.136  16 
  -1  -1  20 4060.45 735.958  21 
   1  -1  20 4080.15 781.438  21 
   1   1  20 4171.09 657.808  17 
   1  -1  20 4392.09 610.668  14 
  -1   1  21 444.270 258.312  16 
  -1  -1  21 499.296 247.125  21 
  -1   1  21 381.835 140.620  14 
  -1  -1  21 544.459 216.022  14 
  -1  -1  21 557.690 244.783  16 
   1   1  21 485.843 275.872  17 
  -1  -1  21 674.220 322.876  17 
  -1   1  21 282.957 164.627  21 
   1  -1  21 432.536 170.225  14 
   1   1 -21 228.167 237.182  10 
  -1  -1 -21 224.654 196.435  10 
   1  -1  21 333.260 266.972  21 
  -1   1 -21 468.157 301.296  10 
   1   1  21 660.558 224.349  14 
  -1   1  21 508.853 207.337  17 
   1   1  21 248.310 188.774  16 
   1  -1  21 437.567 271.128  16 
  -1   1  22 2226.11 471.705  16 
   1  -1 -22 1291.09 396.800  10 
  -1   1 -22 1739.56 439.137  10 
   1   1  22 3188.18 443.655  14 
  -1   1  22 3192.22 445.370  14 
   1   1 -22 1598.69 449.646  10 
  -1  -1  22 3115.23 571.934  21 
   1   1  22 2249.61 496.596  16 
  -1   1  22 3079.48 573.788  21 
   1  -1  22 2865.56 425.257  14 
   1   1  22 2365.87 431.311  17 
  -1  -1  22 3016.58 448.161  14 
  -1  -1 -22 1342.11 386.555  10 
   1  -1  22 2932.57 543.133  21 
  -1  -1  22 2668.38 538.457  16 
  -1   1  22 2204.29 416.923  17 
   1  -1  22 2731.01 553.613  16 
   1   1  22 3138.95 582.899  21 
   1   1  23 798.831 244.089  16 
  -1   1  23 1250.47 271.377  14 
  -1   1  23 908.150 282.575  16 
  -1   1  23 1181.16 301.326  21 
   1   1  23 1234.84 257.352  14 
  -1  -1  23 1159.31 257.021  14 
   1  -1 -23 400.506 186.003  10 
   1   1 -23 463.234 243.454  10 
   1   1  23 1066.02 293.101  21 
  -1  -1  23 917.636 291.417  16 
  -1  -1  23 1389.95 330.435  21 
  -1  -1 -23 392.349 158.912  10 
   1  -1  23 1033.08 267.082  21 
   1  -1  23 911.482 262.329  16 
  -1   1  23 931.331 246.189  17 
   1  -1  23 1048.00 245.014  14 
  -1   1 -23 480.048 251.902  10 
   2   1   0 71513.4 3401.79   5 
   2   1   0 87618.7 3262.10   1 
  -2  -1   0 58400.6 2514.44   1 
   2  -1   0 65851.0 2214.23   1 
   2   1   0 61539.2 4290.05   4 
  -2   1   0 90869.4 2534.24   1 
  -2  -1   0 67671.8 2421.18   2 
  -2  -1   0 70193.4 5041.48   4 
  -2  -1   0 76728.0 2648.43   3 
   2   1   1 14.2647 208.138   5 
  -2  -1   1 27.1824 22.0783   4 
  -2  -1  -1-110.521 232.182   4 
  -2   1  -1-3.31974 77.9706   1 
  -2   1   1 4.31966 9.83897   3 
   2   1   1 111.596 40.1879   4 
   2  -1   1 59.2088 65.5793   1 
  -2  -1   1 98.6863 172.245   3 
   2   1  -1 91.1044 100.472   2 
  -2   1   1 28.0013 124.578   2 
  -2  -1  -1-26.6221 98.2149   1 
   2   1  -1 75.8111 134.411   3 
  -2  -1   1 119.162 61.4578   2 
   2  -1  -1 49.7812 33.7377   1 
  -2  -1   1 162.548 214.486   5 
   2  -1  -1 163.609 107.576   1 
   2   1   1 48.2175 134.522   1 
   2   1  -1-34.7756 136.758   5 
   2   1  -1-87.3164 268.821   4 
   2  -1   2 14949.2 1438.36   1 
  -2   1  -2 14336.8 1295.65   1 
  -2   1   2 14744.0 1572.94   1 
  -2  -1  -2 16675.4 1969.22   1 
   2   1   2 14935.2 2267.96   4 
   2  -1   2 17757.3 2752.88   4 
   2  -1  -2 13066.9 1572.53   2 
  -2   1   2 13144.5 1525.80   3 
  -2  -1   2 15546.5 1461.16   5 
   2   1  -2 15009.0 1469.87   2 
   2   1  -2 14009.6 1344.15   5 
  -2   1   2 13564.2 1504.97   2 
   2  -1  -2 14744.3 1625.54   1 
   2  -1  -2 13505.0 1629.74   3 
   2   1   2 18396.8 2372.41   1 
   2   1  -2 8720.86 1138.13   4 
  -2  -1  -2 15270.6 2585.34   4 
   2   1  -2 13013.1 1401.79   3 
  -2  -1  -3 16037.0 2173.53   1 
  -2  -1  -3 13764.2 2917.74   4 
   2   1  -3 13614.1 1667.43   3 
   2   1  -3 14415.5 1688.32   2 
  -2   1   3 14800.1 1761.18   1 
   2  -1  -3 16747.7 2089.99   1 
   2   1   3 15256.0 2276.01   4 
   2  -1   3 16849.4 2886.08   4 
   2  -1   3 13778.3 1667.56   1 
  -2   1  -3 13822.4 1453.98   1 
   2  -1  -3 13119.1 1793.90   3 
  -2  -1   3 15267.6 1435.49   5 
   2   1  -3 12623.2 885.374   1 
   2  -1  -3 13108.8 1749.64   2 
  -2   1   3 13921.6 1710.24   3 
   2   1   3 17077.4 2608.79   1 
  -2   1   3 14552.2 1699.71   2 
  -2   1   4 26444.0 2464.17   2 
  -2   1  -4 27453.8 2395.57   1 
   2   1  -4 25652.6 2530.53   3 
  -2   1   4 25243.3 2448.35   3 
  -2  -1   4 27344.0 2022.70   5 
  -2  -1  -4 28673.2 4505.25   4 
   2  -1  -4 23083.1 2514.21   3 
   2  -1  -4 23101.2 2469.33   2 
   2  -1  -4 24316.0 3299.22   1 
  -2  -1   4 12508.8 2352.04   1 
   2   1  -4 25283.8 2460.77   2 
   2  -1   4 24496.8 2594.44   1 
   2   1  -4 22748.7 1702.38   1 
   2  -1   4 23769.2 3822.80   4 
  -2  -1  -4 22539.9 2881.96   1 
  -2   1   4 23067.6 2677.78   1 
   2   1   4 26447.4 3811.84   1 
   2   1   4 24209.6 3262.11   4 
   2   1   5 21132.8 3704.83   1 
   2   1  -5 23808.0 2719.54   3 
  -2   1   5 20877.0 2973.49   1 
   2  -1   5 24138.0 4100.03   4 
   2  -1   5 21091.8 2957.86   1 
   2  -1  -5 20453.7 2527.22   2 
  -2  -1  -5 24503.2 3378.49   1 
   2   1   5 25549.9 3504.38   4 
   2   1  -5 20435.2 1912.33   1 
   2  -1  -5 20574.8 3441.20   1 
  -2  -1   5 13536.8 2622.56   1 
  -2   1  -5 26377.5 2543.42   1 
  -2  -1   5 24910.1 2067.41   5 
   2   1  -5 24460.0 2718.85   2 
   2   1  -5 11053.3 1174.65   4 
  -2  -1  -5 28774.0 4781.00   4 
   2  -1  -5 21193.6 2639.79   3 
   2   1  -6 13169.9 1780.37   1 
  -2  -1  -6 19614.1 4372.43   4 
   2  -1  -6 10866.9 2808.56   1 
  -2  -1  -6 17432.1 2887.91   1 
  -2   1   6 10048.0 2523.82   1 
   2   1  -6 11543.8 1521.74   4 
  -2   1  -6 23499.7 4286.26   4 
   2  -1   6 12212.7 3120.12   4 
  -2   1  -6 16554.0 2230.82   1 
  -2  -1   6 8905.31 2288.89   1 
  -2   1  -7 1414.40 1096.01   4 
  -2   1  -7 1078.10 650.599   1 
   2  -1  -7 1185.29 616.730   4 
   2   1  -7 1371.34 690.070   4 
   2  -1  -7 705.154 797.621   1 
  -2  -1  -7 968.840 723.651   1 
  -2  -1  -7 1125.30 1043.56   4 
  -2  -1   7 817.838 804.392   1 
   2   1  -7 1251.11 610.039   1 
   2  -1  -8 2904.28 1449.42   1 
   2  -1  -8 3938.22 1441.25   4 
  -2   1  -8 5341.19 1487.63   1 
  -2  -1  -8 5510.50 2693.49   4 
   2   1  -8 4833.81 1235.31   4 
   2   1  -8 4095.45 1199.42   1 
  -2  -1  -8 4622.27 1691.57   1 
   2   1  -9 30723.2 3490.97   1 
  -2   1  -9 34323.0 4149.78   1 
   2  -1  -9 19378.3 3545.97   4 
   2   1  -9 32091.3 3517.73   4 
   2  -1  -9 26385.5 4628.31   1 
  -2  -1  -9 34114.2 4778.12   1 
  -2  -1  -9 35259.9 7094.47   4 
  -2   1  10 8143.17 918.920  25 
  -2   1  10 7874.11 894.018  24 
   2   1  10 9863.62 806.208  17 
  -2  -1  10 8674.95 906.004  24 
   2  -1 -10 4791.43 1939.59   4 
  -2   1  10 9274.13 819.108  26 
   2  -1 -10 6105.36 2103.69   1 
  -2   1  10 9645.18 867.662  17 
  -2  -1  10 8238.59 623.272  14 
  -2  -1 -10 10034.8 3988.44   4 
  -2   1  10 8616.04 649.614  14 
  -2   1  10 9375.44 681.139   6 
  -2  -1  10 8056.24 805.893  17 
   2  -1  10 9181.55 953.235  16 
  -2  -1  10 8625.67 896.450  25 
   2   1  10 10053.0 709.891   6 
   2   1 -10 7408.54 1862.93   1 
  -2  -1  10 8759.99 969.110  16 
  -2  -1 -10 8269.10 2565.38   1 
   2  -1  10 8538.08 627.978  14 
   2  -1  10 8031.54 667.127   9 
   2   1  10 8801.38 664.138  14 
  -2  -1 -10 8199.18 1088.13  12 
  -2   1  10 9055.21 684.035   8 
  -2  -1  10 9490.34 837.354  26 
  -2  -1  10 9014.30 642.842   6 
   2  -1  10 9315.64 668.385   6 
   2  -1  10 9340.73 797.238  17 
  -2   1 -10 9094.87 2222.34   1 
  -2  -1  11 21015.8 1451.90  24 
   2  -1  11 22319.9 1589.28  16 
  -2   1  11 23074.5 1349.53  26 
  -2  -1  11 23648.9 1412.05  17 
   2  -1  11 20866.1 1125.63   9 
   2  -1  11 23494.6 1116.16   6 
  -2  -1 -11 20265.4 4115.70   1 
  -2   1  11 23615.0 1147.60   6 
  -2   1  11 21430.7 1523.98  24 
  -2  -1  11 16686.5 2339.24   5 
   2   1  11 24325.6 1152.73   6 
  -2   1 -11 21817.5 3612.14   1 
  -2  -1 -11 22734.7 6263.60   4 
   2  -1  11 20986.4 1050.68  14 
  -2   1  11 20800.8 1496.56  25 
  -2  -1  11 22051.4 1637.48  16 
   2  -1  11 23220.9 1307.18  17 
  -2  -1 -11 21164.2 1784.76  12 
  -2  -1  11 21240.7 1470.07  25 
   2  -1 -11 16769.2 3838.10   1 
  -2   1 -11 21451.8 1366.40  23 
   2   1  11 21558.1 1102.17  14 
  -2  -1  11 20567.7 1069.47  14 
   2  -1 -11 10217.0 3474.21   4 
  -2  -1  11 24639.5 1375.10  26 
  -2  -1 -11 22788.7 1497.68  23 
   2   1  11 24047.6 1347.86  17 
   2   1  11 20537.9 1113.53   9 
  -2  -1  11 22659.9 1084.66   6 
   2   1 -11 19257.4 3049.91   1 
  -2   1  11 21119.8 1089.20  14 
  -2   1  11 22412.7 1379.99  17 
   2   1  12 280.589 117.626   6 
  -2   1 -12 304.936 176.076  23 
   2   1  12 233.135 151.398  14 
  -2  -1  12 270.702 142.230   6 
  -2   1  12 272.226 155.959  24 
  -2   1  12 58.7851 80.0487  17 
  -2  -1 -12 1594.65 2078.30   4 
  -2   1  12 391.180 230.717  26 
   2  -1  12 305.900 144.540   6 
  -2  -1 -12-76.9889 192.169  12 
  -2   1 -12 301.114 317.847   1 
  -2  -1  12 154.440 156.383  17 
  -2  -1  12 282.508 160.093  26 
  -2  -1  12 123.400 63.2474  14 
   2   1  12 183.546 133.765  17 
   2   1  12 152.084 140.966   9 
   2  -1  12 268.522 133.653  17 
  -2  -1 -12 95.0532 266.473   1 
   2   1  12 164.222 177.352  16 
  -2  -1  12 277.995 136.060  25 
   2   1 -12 482.486 462.226   1 
  -2  -1 -12 230.539 192.785  23 
   2  -1  12 253.660 108.159  14 
  -2  -1  12 217.603 161.777  24 
   2  -1  12 211.173 169.024  16 
   2  -1  12 166.792 102.193   9 
   2  -1 -12 197.900 629.445   1 
  -2   1  12 82.2708 76.0362  25 
  -2   1  12 199.444 93.7515   6 
  -2   1  12 279.431 157.592  14 
  -2  -1  12 249.772 223.541  16 
   2  -1 -13 5388.74 2336.08   1 
  -2  -1  13 7596.08 1075.16  16 
  -2  -1 -13 9000.67 4207.47   4 
   2   1  13 8118.62 1118.92  16 
   2   1 -13 6569.13 2030.27   1 
   2   1  13 9270.88 779.007   6 
   2   1  13 8431.02 724.827   9 
   2  -1  13 8729.21 739.765  14 
  -2  -1  13 8948.51 1030.18  25 
  -2  -1 -13 8748.75 973.663  23 
  -2  -1  13 8104.12 910.288  17 
  -2   1  13 8334.22 1033.47  24 
   2   1  13 8384.09 756.604  14 
   2   1  13 9107.09 931.448  17 
  -2  -1 -13 6751.73 1121.41  12 
   2  -1  13 8264.01 785.739   9 
  -2   1  13 9584.07 784.866   6 
   2  -1  13 8849.66 907.071  17 
  -2  -1 -13 7712.45 2663.13   1 
  -2   1  13 9153.30 871.457  26 
  -2  -1  13 8816.57 1028.47  24 
   2  -1 -13 5769.46 1274.39  12 
  -2   1  13 8578.62 761.433  14 
  -2  -1  13 8463.39 766.338  14 
  -2  -1  13 8469.64 889.006  26 
  -2   1  13 8564.73 1063.20  25 
   2  -1  13 9067.49 1085.00  16 
  -2   1 -13 9401.91 2509.94   1 
  -2   1  13 8715.71 948.105  17 
  -2  -1  13 8921.03 764.439   6 
   2  -1  13 9378.52 778.303   6 
  -2  -1  14 10631.0 1159.38  24 
  -2   1  14 9997.14 1160.89  24 
   2  -1  14 9921.01 1023.34  17 
   2  -1  14 9665.76 892.991   9 
  -2  -1 -14 8782.14 1299.52  12 
   2  -1 -14 7772.36 1378.79  12 
   2   1  14 11321.1 917.049   6 
  -2   1  14 9897.26 1295.26  16 
  -2   1  14 10617.0 1188.69  25 
  -2  -1  14 10405.8 1102.66  17 
  -2  -1  14 9791.11 977.926  26 
  -2   1  14 10133.5 871.334  14 
   2  -1 -14 6593.12 2579.35   1 
   2  -1  14 10179.6 859.658  14 
   2   1  14 10831.3 843.546   9 
   2   1  14 10582.2 875.686  14 
   2   1  14 9520.76 1254.50  16 
  -2  -1  14 10031.2 1270.28  16 
   2  -1  14 11330.3 896.918   6 
   2   1  14 11160.8 1050.61  17 
  -2  -1 -14 10702.9 1061.45  23 
  -2   1  14 10609.5 978.973  26 
   2  -1  14 10290.0 1210.89  16 
  -2   1  14 10925.6 893.636   6 
  -2  -1  14 10135.7 870.266  14 
  -2  -1  14 10251.7 1138.42  25 
  -2  -1  14 10910.3 880.245   6 
  -2   1  14 9962.25 1063.43  17 
  -2   1  15 8760.83 1031.30  17 
   2  -1  15 8545.52 819.132  14 
  -2  -1  15 10154.2 889.858   6 
   2  -1  15 9213.77 1035.97  17 
  -2   1  15 8085.56 1227.85  16 
  -2   1  15 9647.88 866.306   6 
   2  -1  15 8770.36 878.452   9 
  -2  -1  15 8980.98 972.801  26 
   2   1  15 8600.59 815.818  14 
   2   1  15 9736.87 860.712   6 
  -2  -1  15 8487.01 1067.44  24 
  -2   1  15 9259.25 943.607  26 
   2   1  15 9378.47 809.636   9 
   2  -1 -15 6169.04 1291.54  12 
   2  -1  15 9157.95 1177.84  16 
  -2  -1  15 9370.33 1066.41  17 
   2   1  15 8905.30 983.939  17 
  -2   1  15 8584.88 1080.84  24 
  -2  -1  15 8846.34 1198.16  16 
  -2  -1  15 9270.13 882.578  14 
  -2  -1  15 8646.92 1080.01  25 
  -2   1  15 9323.18 852.809  14 
  -2   1  15 8956.93 1108.79  25 
   2  -1  15 10047.6 884.917   6 
  -2  -1 -15 6816.77 1119.35  12 
   2   1  15 8322.63 1173.05  16 
   2  -1 -16 315.032 228.744  12 
  -2  -1 -16 224.449 322.958  12 
  -2   1  16 283.078 213.766  25 
   2  -1  16 173.212 121.414  17 
  -2   1  16 248.449 204.798  16 
  -2   1  16 545.652 292.682  24 
   2  -1  16 216.589 129.876   9 
   2  -1  16 270.351 152.972   6 
   2  -1  16 84.3565 210.306  16 
   2   1  16 195.756 43.4796  17 
   2   1  16 312.530 265.183  16 
   2   1  16 277.538 144.707  14 
  -2   1  16 135.835 113.672  26 
  -2  -1  16 192.893 201.446  16 
  -2  -1  16 487.680 257.784  24 
  -2  -1  16 399.810 211.628  26 
  -2   1  16 247.352 75.8740   6 
   2  -1  16 275.512 196.739  14 
  -2  -1  16 265.704 141.381   6 
  -2  -1  16 239.936 155.247  14 
  -2   1  16 231.161 49.1906  17 
   2   1  16 275.474 174.246   6 
  -2  -1  16 462.074 184.171  25 
  -2   1  16 276.356 154.625  14 
  -2  -1  16 319.206 199.531  17 
   2  -1  16 421.783 161.644  15 
  -2   1  17 7570.05 810.483   6 
  -2   1  17 6759.63 821.130  26 
  -2  -1  17 6989.26 790.788   6 
  -2  -1  17 7041.96 965.678  24 
   2  -1  17 7871.08 806.195   6 
  -2   1  17 5797.47 1055.80  16 
  -2  -1  17 6851.14 1120.23  16 
   2  -1  17 6471.88 750.911   9 
   2  -1  17 6372.28 1007.11  16 
   2   1  17 7131.51 908.588  17 
  -2   1  17 6561.62 953.610  24 
   2  -1  17 6806.28 874.977  17 
  -2  -1  17 6671.56 948.904  25 
   2   1  17 7216.42 771.689  14 
  -2  -1  17 6570.07 807.293  14 
   2  -1 -17 4321.68 1047.63  12 
   2   1  17 8061.68 816.566   6 
  -2  -1  17 6547.02 833.727  26 
   2  -1  17 6675.97 794.621  15 
  -2   1  17 6570.88 902.292  17 
  -2  -1  17 6992.77 918.417  17 
  -2  -1 -17 4693.06 952.387  12 
  -2   1  17 6365.21 934.559  25 
  -2   1  17 7084.03 789.226  14 
   2   1  17 6267.60 1032.98  16 
   2  -1  17 6696.62 772.920  14 
  -2   1  18 232.925 130.538  25 
  -2   1  18 16.0519 158.075  17 
  -2   1  18 399.022 245.910  14 
   2  -1  18 392.908 133.670  14 
   2   1  18 268.149 151.721  14 
  -2  -1  18 353.357 238.287  17 
   2   1  18 388.366 272.834  17 
  -2  -1  18 34.5127 31.0011  25 
   2  -1  18 119.811 219.944  17 
   2  -1  18 165.040 61.3937  15 
   2  -1 -18 309.510 243.882  12 
  -2   1  18 268.245 141.765  16 
  -2  -1  18 240.218 105.095  24 
  -2   1  18 213.382 184.552  24 
  -2  -1  18 224.999 240.160  16 
  -2   1  18 179.826 134.891   6 
  -2  -1 -18 366.037 219.600  10 
  -2   1 -18 204.723 160.222  10 
  -2  -1  18 251.806 134.718  14 
  -2  -1 -18 13.5613 109.066  12 
   2   1  18 274.121 240.497  16 
   2   1  18 131.349 108.493   6 
   2  -1  18 309.145 293.881  16 
  -2  -1  18 600.817 376.933  21 
   2   1  19 3337.78 533.822   6 
  -2   1  19 3377.13 527.944   6 
   2  -1  19 3311.06 509.670  15 
   2  -1  19 3144.44 572.523  17 
   2   1  19 3057.08 571.236  17 
   2   1  19 2530.57 620.782  16 
  -2  -1 -19 2278.22 584.427  10 
  -2   1  19 3247.80 552.148  14 
  -2   1  19 2787.84 557.982  25 
  -2   1  19 3142.88 604.721  17 
  -2  -1  19 2881.86 554.665  14 
  -2   1  19 2687.05 680.331  16 
   2   1  19 3493.47 557.038  14 
   2  -1  19 3271.85 521.687  14 
  -2  -1  19 2760.19 601.316  17 
   2  -1  19 3035.97 673.518  16 
  -2   1 -19 2314.67 605.042  10 
   2   1  19 2714.52 504.325  15 
  -2   1  19 2818.37 593.219  24 
  -2  -1  19 3195.90 699.168  21 
  -2  -1  19 2959.14 705.177  16 
  -2  -1  19 2667.04 547.225  24 
  -2  -1  19 2817.65 567.747  25 
   2   1  20 5542.69 899.032  16 
   2  -1  20 5785.71 913.278  16 
  -2  -1  20 5753.55 804.568  17 
  -2  -1  20 5693.92 887.344  21 
  -2   1  20 5608.96 748.920  24 
   2  -1  20 6680.01 682.803  15 
   2   1  20 6664.92 734.790   6 
  -2  -1  20 6262.01 753.632  14 
  -2   1  20 5426.67 741.932  25 
   2  -1  20 6491.18 726.093  14 
  -2  -1  20 5687.99 754.339  25 
   2  -1  20 5910.37 899.886  21 
  -2   1  20 6681.46 732.234  14 
  -2   1  20 6476.02 709.197   6 
  -2   1  20 5735.31 777.168  17 
  -2  -1  20 5321.28 724.447  24 
   2   1  20 5999.53 681.308  15 
   2   1  20 5647.98 745.131  17 
  -2  -1  20 5893.83 949.738  16 
   2   1  20 6820.82 732.945  14 
  -2   1 -20 4525.08 795.317  10 
  -2  -1 -20 4266.95 779.088  10 
  -2   1  20 5339.35 931.876  16 
   2  -1  21 23.3553 117.389  14 
  -2  -1  21-51.0921 97.8055  24 
  -2   1 -21 26.2846 93.9045  10 
  -2  -1  21-168.450 179.259  25 
   2   1  21-46.1130 348.593  16 
   2  -1  21 119.751 84.3584  21 
  -2   1  21 16.8646 85.1004  24 
  -2   1  21 13.9559 40.1056  14 
   2   1  21-0.22354 90.0956  15 
  -2   1  21 43.0867 50.1668  17 
  -2  -1  21-117.349 27.7419  14 
  -2  -1  21-290.184 204.984  21 
  -2  -1  21 113.033 86.4756  17 
   2   1  21-54.4523 130.755  17 
   2   1  21 36.7777 96.4114  14 
   2  -1  21 4.07961 77.8399  16 
  -2  -1 -21 175.216 138.794  10 
  -2  -1  21-73.5737 131.015  16 
  -2   1  21-157.746 77.8068  16 
  -2   1  21-23.2172 57.4251  25 
  -2   1  21 214.343 165.292  21 
   2  -1  21-2.53049 58.4557  15 
   2   1  22 643.512 254.435  16 
  -2  -1  22 1012.11 302.811  21 
  -2   1  22 858.597 236.466  14 
  -2   1  22 683.689 227.296  17 
   2   1  22 834.313 231.040  14 
  -2  -1  22 575.593 188.128  14 
   2   1  22 919.500 324.616  21 
   2  -1  22 663.765 266.358  16 
   2  -1  22 773.535 204.274  14 
  -2  -1  22 615.643 261.395  16 
  -2  -1  22 573.279 187.062  17 
  -2   1  22 502.282 190.449  16 
   2  -1 -22 305.295 159.412  10 
   2   1 -22 618.811 252.446  10 
  -2   1  22 789.545 289.982  21 
  -2  -1 -22 385.597 198.733  10 
  -2   1 -22 371.767 204.511  10 
   2  -1  22 375.077 150.344  21 
   2   1  23 1596.89 343.888  16 
   2  -1 -23 592.896 241.553  10 
   2   1 -23 1066.68 309.160  10 
  -2  -1  23 1776.62 381.096  16 
  -2  -1  23 1949.40 314.941  14 
  -2  -1  23 2229.22 401.986  21 
   2   1  23 2613.30 349.421  14 
  -2   1  23 2743.08 366.552  14 
  -2   1  23 2257.12 403.404  21 
  -2   1  23 1906.09 332.620  17 
   2  -1  23 1830.49 325.389  14 
  -2   1 -23 1180.97 338.117  10 
   2  -1  23 1795.74 351.264  16 
  -2   1  23 1830.49 392.092  16 
   2  -1  23 2551.15 446.330  21 
   2   1  23 2306.62 424.008  21 
   3   1   0 237.772 578.563   4 
  -3  -1   0-41.9592 85.6293   3 
   3   1   0-83.2912 187.408   1 
  -3  -1   0-71.8733 156.730   2 
  -3   1   0 24.9561 61.6676   1 
  -3  -1   0 166.588 491.285   4 
  -3  -1   0 65.4965 61.0781   1 
   3   1   0 19.1705 176.287   5 
   3  -1   0-67.1689 131.143   1 
   3  -1   1 10671.4 1186.64   1 
  -3  -1   1 8948.66 1200.71   2 
  -3   1   1 8066.21 1378.87   3 
   3   1   1 7347.97 1434.58   1 
   3  -1  -1 9804.72 1233.51   1 
  -3   1   1 8292.85 1368.40   2 
   3   1  -1 7371.67 1778.82   4 
   3  -1  -1 7624.69 834.919   1 
   3   1   1 8479.10 1947.39   4 
  -3  -1   1 9474.53 1259.35   3 
  -3   1  -1 8456.10 956.998   1 
  -3  -1  -1 9452.92 1177.29   1 
   3   1  -1 7842.65 1217.80   5 
  -3  -1  -1 9608.89 2279.38   4 
   3   1   2 13066.9 2493.70   4 
  -3  -1   2 14909.5 1697.35   3 
  -3   1   2 13483.4 1798.17   3 
   3   1  -2 13269.8 1635.23   2 
  -3   1  -2 13372.0 1354.76   1 
   3  -1   2 14105.9 1571.10   1 
  -3  -1  -2 15302.6 1747.62   1 
   3   1  -2 13149.5 1962.82   4 
  -3  -1   2 13865.5 1667.68   5 
  -3  -1   2 16781.9 1786.06   2 
   3   1   2 16510.7 2382.78   1 
   3  -1  -2 15824.0 1708.53   1 
  -3   1   2 13371.8 1746.02   2 
   3  -1   2 18476.2 3236.63   4 
   3  -1  -2 15573.5 1222.08   1 
   3   1  -2 12893.0 1652.23   3 
   3   1  -2 13349.1 1576.43   5 
  -3  -1  -2 15567.4 3126.37   4 
   3  -1  -3 112748. 5396.83   1 
   3  -1  -3 94819.6 5328.00   3 
   3   1   3 90471.8 6362.37   1 
   3  -1   3 87041.1 4681.94   1 
  -3   1   3 101247. 5100.68   3 
   3  -1  -3 93859.7 5207.71   2 
   3  -1  -3 87570.5 2336.54   5 
  -3  -1  -3 118250. 5610.35   1 
  -3  -1   3 97445.1 4337.64   5 
   3  -1   3 107826. 8595.22   4 
  -3   1  -3 116985. 4556.08   1 
   3   1   3 91250.4 6982.51   4 
  -3   1   3 104443. 4600.30   1 
   3   1  -3 99316.2 4993.11   3 
  -3  -1   3 120582. 5367.79   2 
  -3  -1   3 106698. 5007.03   3 
  -3   1   3 102400. 4980.85   2 
   3   1  -3 87155.1 4573.62   4 
  -3  -1  -3 91802.1 8268.54   4 
   3   1  -3 98545.6 4875.34   2 
  -3   1  -4 19176.1 2035.38   1 
  -3   1   4 17734.7 2257.63   3 
   3   1   4 16080.4 2957.92   4 
  -3  -1   4 17367.5 1812.87   5 
  -3  -1  -4 19794.8 4062.18   4 
   3  -1  -4 16521.5 2435.42   3 
  -3   1   4 17243.5 2113.50   1 
  -3  -1  -4 22199.7 2639.70   1 
  -3  -1   4 12915.0 1330.32   1 
   3  -1   4 17630.1 2382.41   1 
   3   1  -4 17858.5 2345.01   3 
   3   1  -4 15813.6 1116.14   1 
   3  -1  -4 16353.2 2401.80   2 
   3   1  -4 13962.5 1563.36   4 
   3  -1  -4 19694.9 2824.28   1 
   3  -1   4 21842.9 4003.35   4 
  -3   1   4 18117.1 2265.63   2 
   3   1   4 19945.4 3302.80   1 
   3   1  -4 17835.9 2280.24   2 
  -3  -1   5 3152.72 990.726   1 
  -3  -1  -5 4406.03 2130.41   4 
   3  -1  -5 3570.93 1511.09   1 
  -3   1   5 3524.91 1112.55   1 
  -3   1   5 4093.53 1168.88   2 
  -3  -1  -5 4758.46 1291.71   1 
  -3  -1   5 4169.58 896.946   5 
   3   1  -5 3840.33 716.265   1 
  -3   1  -5 4167.77 1025.47   1 
   3   1  -5 1942.70 387.695   4 
  -3   1   5 3872.32 1167.51   3 
   3   1  -5 2214.36 506.568   4 
   3  -1  -6 954.267 943.945   1 
  -3  -1  -6 991.233 938.693   4 
  -3  -1  -6 1306.74 819.768   1 
   3   1  -6 791.435 402.243   1 
  -3  -1   6 983.842 446.213   5 
  -3  -1   6 732.119 602.470   1 
  -3   1   6 760.158 628.597   1 
  -3   1  -6 1300.87 590.647   1 
  -3  -1   7 4663.73 1589.02   1 
  -3   1  -7 5609.83 1432.59   1 
   3  -1  -7 3006.79 1446.46   1 
   3   1  -7 5601.66 1145.14   1 
  -3  -1   7 5831.73 1101.47   5 
  -3  -1  -7 6460.19 2775.42   4 
  -3  -1  -7 6760.64 1876.15   1 
   3   1  -8 15064.9 2088.74   1 
  -3  -1   8 13556.6 1758.10   5 
  -3  -1   8 8597.54 2560.35   1 
   3  -1  -8 10071.0 2807.37   1 
  -3   1  -8 15544.7 2562.02   1 
  -3  -1  -8 20849.6 5205.98   4 
   3  -1  -8 12372.0 2397.46   4 
  -3  -1  -8 17261.9 3219.72   1 
  -3  -1   9 17863.0 2083.78   5 
  -3   1   9 21050.8 1456.12  24 
  -3  -1   9 23732.1 1321.55  26 
  -3  -1   9 21514.0 1397.83  25 
  -3  -1  -9 27838.5 6319.19   4 
  -3  -1  -9 19963.3 3580.78   1 
  -3   1  -9 20936.7 3289.27   1 
   3  -1  -9 13673.0 2793.99   4 
  -3   1   9 19823.3 1254.47  17 
   3   1  -9 18378.9 2568.43   1 
  -3   1   9 21111.4 1466.87  25 
   3  -1  -9 14245.3 3251.36   1 
   3  -1   9 21701.0 1171.28  17 
  -3  -1   9 21570.3 1404.44  24 
  -3   1   9 23224.1 1299.99  26 
  -3  -1  10 16838.1 1156.69  17 
  -3   1  10 18095.9 1211.87  26 
  -3  -1  10 17495.9 1217.91  26 
   3  -1  10 17164.4 1019.45   9 
  -3  -1  10 16976.3 912.519  14 
  -3  -1  10 16791.2 1301.65  24 
  -3   1 -10 18724.6 1242.11  23 
   3   1  10 19590.7 1001.62   6 
   3   1 -10 14927.9 2348.28   1 
   3  -1 -10 11744.3 2963.82   1 
  -3   1  10 16386.7 943.553   8 
  -3  -1 -10 18843.2 5582.49   4 
  -3  -1 -10 17727.2 1543.15  12 
   3   1  10 18238.6 1369.74  16 
  -3  -1 -10 18574.6 1402.34  23 
  -3   1  10 17439.4 932.255  14 
  -3   1  10 18898.6 971.136   6 
   3  -1 -10 7903.16 2406.86   4 
  -3   1 -10 16367.2 3004.64   1 
   3   1  10 20106.9 1149.48  17 
  -3  -1  10 13034.3 1826.75   5 
  -3   1  10 17619.1 1227.08  17 
   3  -1  10 18172.2 1133.74  17 
   3  -1  10 18862.2 1336.18  16 
   3  -1  10 17137.6 895.160  14 
  -3  -1 -10 17305.8 3503.46   1 
   3   1  10 17011.2 945.103  14 
  -3  -1  10 16416.6 1351.82  16 
  -3  -1  10 17985.0 912.159   6 
  -3   1  10 16915.9 1370.01  24 
  -3   1  10 16304.9 1337.82  25 
  -3  -1  10 16499.5 1298.93  25 
   3  -1  10 19174.3 961.761   6 
   3  -1  11 40.3283 41.9344  17 
   3  -1  11 10.1939 58.1181   6 
  -3   1  11 107.199 45.3967  25 
  -3  -1  11 50.4480 104.328  14 
   3  -1 -11-67.5499 537.999   1 
  -3  -1  11 23.0227 100.826  16 
   3   1 -11 104.026 60.7990   1 
   3   1  11-3.68495 29.9155  16 
   3  -1  11 25.9631 77.0724  16 
  -3  -1  11 77.4552 162.980  26 
   3   1  11 62.3632 70.3866   6 
  -3   1  11 56.4327 27.5749   6 
  -3  -1 -11 88.6143 812.317   1 
  -3   1  11 27.7353 67.7868  17 
  -3   1  11 97.7887 86.9707   8 
  -3  -1 -11 66.3554 142.434  23 
  -3   1 -11-87.5280 202.964  23 
  -3  -1 -11-842.526 745.257   4 
  -3  -1  11 22.9210 84.8323  24 
  -3   1 -11 235.611 154.910   1 
  -3   1  11-3.96529 144.477  24 
   3   1  11-49.4094 80.4956  14 
  -3  -1  11 156.928 168.553  25 
  -3   1  11 7.06529 38.3176  14 
  -3  -1  11 53.9541 56.3682   6 
   3  -1  11-92.3883 91.1611   9 
   3  -1  11 77.3166 70.5830  14 
   3   1  11 9.94689 33.9087  17 
  -3   1  11 97.4234 176.658  26 
  -3  -1  11-46.0170 51.4581  17 
  -3  -1 -11-134.984 235.281  12 
  -3   1 -12 2705.88 1269.86   1 
  -3  -1 -12 2746.83 669.920  12 
   3   1  12 2839.46 412.339  14 
   3  -1  12 2940.23 610.273  16 
  -3   1  12 2776.51 518.187  26 
   3   1  12 3046.66 431.880   6 
  -3  -1  12 2651.42 415.317  14 
  -3   1 -12 3062.50 551.756  23 
  -3   1  12 2650.47 515.649  17 
  -3  -1  12 3085.88 619.504  25 
  -3  -1  12 2840.36 521.934  26 
  -3  -1  12 2806.14 592.169  24 
   3  -1  12 2995.71 463.586  17 
  -3  -1 -12 2819.31 567.907  23 
  -3  -1 -12 2824.02 1510.18   1 
   3   1  12 2655.36 442.835   9 
  -3   1  12 2758.37 396.993  14 
   3  -1  12 2805.20 429.044   9 
  -3   1  12 2701.63 593.595  25 
   3  -1  12 2741.82 393.745  14 
   3  -1  12 3237.32 444.573   6 
  -3  -1 -12 4399.60 2993.77   4 
  -3   1  12 3026.27 423.609   6 
   3  -1 -12 1408.79 1096.34   1 
  -3  -1  12 2848.10 566.202  17 
   3   1  12 2785.04 622.816  16 
  -3   1  12 2725.78 599.225  24 
  -3  -1  12 2947.68 412.306   6 
  -3  -1  12 2503.49 578.803  16 
   3   1  12 3026.87 476.617  17 
  -3  -1  13 4768.89 681.785  26 
  -3   1  13 4207.32 777.697  25 
  -3  -1 -13 4833.14 714.789  23 
  -3  -1  13 4361.95 546.223  14 
   3   1  13 4785.32 569.688   9 
   3  -1  13 5008.47 578.622   6 
  -3   1  13 3980.89 671.108  17 
  -3  -1 -13 2511.88 1460.43   1 
  -3  -1  13 4214.45 734.640  24 
   3   1  13 4121.05 783.887  16 
   3  -1  13 4315.56 582.574   9 
  -3  -1  13 4062.65 803.269  16 
  -3   1 -13 4625.27 1774.55   1 
  -3  -1  13 4420.21 673.343  17 
  -3   1  13 4548.99 551.346   6 
  -3  -1 -13 3778.61 771.985  12 
   3  -1 -13 3502.41 1646.18   1 
  -3  -1 -13 5994.16 3592.95   4 
   3   1  13 4712.14 554.155   6 
  -3   1  13 4699.32 660.705  26 
  -3  -1  13 4431.88 757.411  25 
   3  -1  13 4440.11 761.762  16 
   3   1  13 4647.91 636.132  17 
   3   1  13 4388.46 557.679  14 
  -3   1  13 4361.60 775.776  24 
   3  -1  13 4810.81 547.672  14 
  -3  -1  13 4760.26 550.964   6 
   3  -1  13 4678.28 670.570  17 
  -3   1  13 4517.74 550.737  14 
  -3   1 -13 5575.64 723.499  23 
  -3  -1  14 90.9833 58.8747  17 
  -3   1  14-10.8073 138.708  17 
   3  -1  14-58.8572 52.3924   9 
   3  -1  14 278.225 293.506  16 
  -3  -1  14 63.0593 30.3359   6 
  -3  -1  14-49.1761 109.102  14 
  -3   1  14 87.1756 184.075  16 
   3  -1  14 92.4474 56.3581  14 
  -3   1  14 36.9168 106.630   6 
   3  -1 -14-50.5736 265.011  12 
  -3  -1  14 11.7972 91.0666  24 
   3   1  14-22.4046 46.5545  14 
  -3  -1  14-65.1389 78.2184  26 
  -3  -1  14 11.1792 29.5579  16 
   3   1  14-63.6912 63.0694   9 
   3  -1  14-68.1932 111.141  17 
  -3   1  14 220.016 138.433  14 
   3   1  14-27.8455 21.6318  17 
  -3  -1 -14 17.0586 193.120  12 
   3   1  14 192.989 163.532  16 
  -3  -1 -14 164.255 178.192  23 
  -3   1  14-88.3034 53.5737  24 
  -3  -1  14 65.0577 135.935  25 
   3  -1  14 28.9732 89.3242   6 
  -3   1  14-89.2729 61.9809  25 
  -3   1  14-109.456 176.589  26 
   3   1  14 75.4447 23.4875   6 
   3  -1  15 14167.5 1270.36  17 
   3   1  15 13914.0 1480.01  16 
  -3   1  15 14789.7 1090.27  14 
  -3  -1  15 14377.8 1092.91  14 
   3  -1  15 13832.3 1100.77   9 
  -3   1  15 14175.1 1211.35  26 
   3   1  15 14250.2 1049.91  14 
  -3   1  15 13422.7 1446.08  25 
   3   1  15 13981.3 1070.02   9 
   3   1  15 15249.2 1091.97   6 
  -3  -1 -15 12494.4 1411.01  12 
   3  -1 -15 10689.7 1693.49  12 
  -3   1  15 12642.4 1536.94  16 
  -3   1  15 15707.9 1091.01   6 
  -3   1  15 13273.5 1419.52  24 
   3  -1  15 13611.1 1419.24  16 
  -3  -1  15 15475.5 1107.36   6 
  -3  -1  15 13558.3 1501.06  16 
   3   1  15 14833.4 1258.51  17 
  -3  -1  15 13988.4 1380.63  24 
  -3  -1  15 14289.4 1329.42  17 
  -3  -1  15 14496.9 1398.29  25 
  -3  -1  15 15160.1 1248.02  26 
  -3   1 -15 13039.9 1317.76  10 
   3  -1  15 13836.6 1032.02  14 
  -3   1  15 14161.2 1324.34  17 
   3  -1  15 15230.0 1100.31   6 
  -3  -1 -15 14847.7 1324.00  23 
   3   1  16 14480.7 1266.03  17 
  -3  -1  16 14809.9 1472.17  24 
   3  -1  16 13954.9 1141.62   9 
  -3   1  16 13832.7 1432.37  24 
  -3   1  16 13865.3 1208.55  26 
  -3  -1  16 14216.1 1544.28  16 
  -3  -1 -16 13330.9 1317.88  10 
  -3   1  16 13040.5 1328.03  17 
  -3  -1 -16 15713.6 1327.05  23 
   3  -1 -16 10804.8 1633.22  12 
   3  -1  16 14440.3 1162.73  15 
   3   1  16 15558.7 1142.84   6 
  -3   1  16 15222.6 1127.96  14 
  -3  -1  16 13303.9 1334.53  17 
  -3  -1 -16 11762.4 1380.67  12 
  -3  -1  16 13476.6 1262.00  26 
  -3   1  16 14494.5 1487.21  25 
   3   1  16 13548.1 1493.28  16 
  -3   1  16 12511.7 1541.42  16 
  -3   1  16 15562.0 1120.91   6 
   3  -1  16 14817.6 1092.32  14 
  -3  -1  16 14152.3 1425.88  25 
   3  -1  16 13611.9 1458.19  16 
   3  -1  16 16271.7 1152.11   6 
  -3  -1  16 14985.9 1153.46  14 
   3   1  16 14583.1 1087.86   9 
  -3  -1  16 15135.7 1131.63   6 
  -3   1 -16 12587.9 1314.57  10 
   3   1  16 14582.7 1107.25  14 
   3  -1  16 14045.7 1309.76  17 
  -3   1  17 341.194 194.982  26 
  -3   1  17 456.408 211.316  25 
  -3  -1  17 776.570 300.354  17 
  -3  -1  17 816.107 330.145  25 
  -3   1  17 828.842 260.315   6 
   3  -1 -17 140.262 233.847  12 
   3  -1  17 606.715 303.328  16 
  -3  -1 -17 664.477 272.531  12 
   3  -1  17 667.292 263.356  15 
   3  -1  17 741.900 279.879   9 
  -3   1  17 772.165 332.619  24 
  -3   1  17 741.802 370.473  16 
  -3  -1  17 810.137 338.346  26 
   3   1  17 674.516 294.020  17 
   3  -1  17 672.953 269.255  14 
  -3  -1  17 810.250 260.886  14 
   3   1  17 377.054 287.118  16 
  -3   1  17 773.890 264.977  14 
  -3  -1  17 637.558 358.785  24 
  -3   1  17 620.675 230.295  17 
   3   1  17 869.760 267.507   6 
   3   1  17 714.141 228.629  14 
  -3  -1  17 359.855 222.458  16 
  -3  -1  17 699.065 316.522  21 
   3  -1  17 717.202 326.639  17 
  -3   1 -17 679.843 380.484  10 
  -3  -1 -17 618.307 346.809  10 
   3   1  18 26450.3 1709.10  17 
  -3  -1  18 27383.7 1809.97  17 
  -3  -1  18 26080.2 1877.96  25 
  -3  -1 -18 19775.2 1697.40  12 
  -3   1  18 27514.7 1952.29  25 
   3  -1  18 28129.1 1799.94  17 
  -3  -1 -18 21861.8 1748.86  10 
   3  -1 -18 17022.9 1915.33  12 
   3  -1  18 28868.0 1580.48  14 
  -3  -1  18 25927.4 1872.92  24 
  -3   1  18 26589.6 1916.88  24 
  -3   1  18 29166.4 1564.03   6 
   3   1  18 28909.9 1547.28  14 
   3   1  18 23804.7 1972.94  16 
  -3   1  18 27012.8 1657.62  26 
   3  -1  18 29767.2 1612.01  15 
  -3  -1  18 28365.9 1771.08  26 
  -3  -1  18 26151.3 2010.81  21 
  -3   1  18 27192.4 1828.45  17 
  -3   1  18 28865.8 1594.80  14 
  -3   1  18 24523.9 2111.37  16 
   3  -1  18 25849.9 2006.38  16 
   3   1  18 30249.1 1594.06   6 
   3  -1  18 24079.8 1528.66   9 
  -3  -1  18 26985.4 1649.91  14 
  -3   1 -18 24570.1 1883.90  10 
  -3  -1  18 26180.2 2077.80  16 
   3  -1  19 187.607 159.311  14 
  -3  -1  19 302.882 184.239  21 
  -3  -1  19 271.404 145.542  14 
  -3   1  19 255.690 141.491   6 
  -3   1  19 329.205 212.713  17 
  -3  -1  19 65.0533 82.2847  17 
  -3   1  19 500.367 303.405  25 
  -3  -1  19 170.174 110.136  25 
   3   1  19 372.535 185.711  14 
  -3   1  19 326.426 298.822  16 
   3   1  19 524.602 275.823  17 
  -3   1  19 331.991 157.490  14 
  -3  -1  19 203.992 26.5110  16 
   3  -1  19 323.831 164.080  15 
  -3   1  19 120.513 56.7862  24 
   3   1  19 351.995 278.093  16 
   3   1  19 236.855 153.939  15 
  -3  -1  19 421.449 164.109  24 
  -3   1 -19 332.492 275.357  10 
   3   1  19 318.133 199.301   6 
   3  -1  19 197.688 178.295  16 
  -3  -1 -19 270.434 203.410  10 
  -3   1  20 20806.7 1500.75  25 
   3  -1  20 22477.0 1325.55  14 
   3   1  20 24149.4 1317.31  14 
  -3  -1  20 20051.3 1452.16  25 
   3  -1  20 20143.4 1623.86  16 
  -3   1 -20 17244.7 1511.22  10 
  -3   1  20 20793.4 1505.25  24 
   3  -1  20 21992.1 1704.18  21 
   3   1  20 21178.1 1448.21  17 
  -3   1  20 22005.4 1687.97  21 
  -3  -1  20 19318.4 1461.75  17 
  -3  -1 -20 15446.7 1394.79  10 
  -3  -1  20 21041.7 1685.15  21 
   3   1  20 18443.5 1561.00  16 
  -3   1  20 20758.5 1485.65  17 
  -3  -1  20 21040.3 1723.87  16 
  -3  -1  20 19942.9 1443.66  24 
  -3  -1  20 22020.6 1380.97  14 
  -3   1  20 23626.0 1370.04  14 
   3   1  20 21709.8 1293.27  15 
  -3   1  20 19574.7 1691.00  16 
   3  -1  20 24094.1 1319.99  15 
  -3   1  21 8171.35 958.400  21 
  -3  -1  21 8061.66 942.173  21 
  -3   1 -21 6422.43 863.568  10 
  -3  -1  21 7319.16 789.646  24 
  -3  -1  21 7498.63 942.121  16 
  -3  -1  21 7001.88 777.884  25 
   3   1  21 6865.56 871.483  16 
  -3  -1  21 6539.98 828.587  17 
  -3   1  21 8861.40 798.216  14 
   3   1  21 8674.62 730.571  15 
   3  -1  21 7415.87 894.060  16 
   3   1  21 8990.13 776.714  14 
   3  -1  21 9543.45 748.351  15 
   3  -1  21 8479.32 765.950  14 
  -3  -1  21 8777.47 811.577  14 
  -3   1  21 7404.30 789.182  25 
  -3   1  21 7063.20 808.189  17 
  -3   1  21 7313.16 784.364  24 
  -3  -1 -21 5391.19 777.822  10 
  -3   1  21 6787.23 926.937  16 
   3  -1  21 8616.98 987.754  21 
  -3   1  22 3229.95 436.292  25 
  -3  -1  22 3567.90 578.820  16 
  -3   1  22 3560.82 492.088  17 
  -3   1 -22 3029.20 519.508  10 
   3   1  22 4985.70 521.795  14 
  -3   1  22 3349.96 446.462  24 
   3   1  22 4239.22 642.355  21 
  -3   1  22 4785.65 541.131  14 
  -3  -1  22 4614.60 656.401  21 
   3  -1  22 4563.70 506.292  14 
   3  -1  22 4149.95 636.155  21 
  -3   1  22 3098.26 558.987  16 
  -3  -1  22 4233.60 531.469  14 
   3   1  22 3253.50 541.675  16 
  -3  -1 -22 2226.58 436.042  10 
  -3  -1  22 3447.52 468.638  25 
  -3   1  22 4223.62 608.520  21 
   3   1  22 4701.88 455.203  15 
  -3  -1  22 4003.72 533.032  17 
   3  -1  22 3885.75 584.805  16 
  -3  -1  22 3298.52 472.282  24 
   3  -1  22 4864.44 457.910  15 
   3  -1 -23 615.082 228.569  10 
  -3  -1  23 1519.19 324.051  21 
  -3  -1  23 1497.59 274.216  14 
  -3   1 -23 864.779 265.490  10 
   3   1  23 1537.64 342.942  21 
  -3   1  23 1127.93 275.555  16 
  -3  -1  23 1372.78 314.710  16 
   3  -1  23 1247.49 283.910  16 
   3   1 -23 558.852 207.898  10 
   3  -1  23 1785.10 354.059  21 
  -3   1  23 1613.56 282.481  14 
  -3   1  23 1045.42 232.692  17 
   3   1  23 1129.13 266.952  16 
  -4  -1   0 28790.8 2493.12   2 
   4   1   0 25819.4 4006.94   4 
  -4   1   0 30501.9 1883.33   1 
   4  -1   0 27120.9 1922.47   1 
   4   1   0 27936.4 2874.37   5 
  -4  -1   0 29900.4 2616.74   3 
   4   1   0 21862.0 2392.16   1 
  -4  -1   0 29174.4 1501.66   1 
  -4  -1  -1 1067.54 403.608   1 
   4   1  -1 1031.01 459.651   5 
  -4   1  -1 1203.77 362.062   1 
   4   1  -1 286.011 199.476   1 
   4  -1   1 1084.99 790.380   4 
  -4   1   1 860.932 326.511   2 
   4  -1  -1 1119.65 430.930   1 
   4   1   1 1120.09 560.249   1 
   4  -1   1 1099.97 406.338   1 
   4   1  -1 1112.51 944.671   4 
  -4  -1   1 934.265 442.632   2 
   4   1   1 651.796 614.033   4 
  -4  -1  -1 547.469 393.625   4 
  -4  -1   1 563.975 329.345   3 
   4  -1  -1 1039.53 365.415   1 
  -4  -1   1 864.972 173.072   1 
  -4   1   1 691.270 419.003   3 
  -4  -1   2 21549.5 2353.64   3 
   4  -1   2 21605.0 4091.08   4 
   4   1  -2 20142.2 3133.35   4 
  -4  -1  -2 28647.4 4657.13   4 
   4   1   2 23611.1 2998.75   1 
  -4   1   2 21294.8 2560.18   3 
  -4   1   2 19822.4 2420.01   2 
   4  -1   2 22770.6 2228.89   1 
   4  -1  -2 20895.5 1542.45   1 
  -4   1  -2 22718.1 1899.28   1 
   4   1   2 22483.8 3885.99   4 
  -4  -1  -2 22877.6 2155.66   1 
   4   1  -2 23083.3 2346.38   5 
  -4  -1   2 22854.5 2380.88   2 
   4  -1  -2 25395.2 2385.74   1 
  -4  -1   3 11573.7 1832.94   3 
  -4   1  -3 11575.4 1512.60   1 
   4  -1   3 11362.4 1774.80   1 
   4  -1  -3 11439.4 1800.41   1 
   4   1   3 9420.10 2092.09   1 
   4  -1  -3 10771.3 1184.38   5 
   4   1  -3 9306.43 1709.18   3 
  -4   1   3 10643.9 1840.74   3 
   4   1  -3 8780.38 1627.36   2 
  -4  -1  -3 14766.6 3446.54   4 
  -4  -1   3 11058.8 1757.29   2 
   4   1  -3 10000.9 1480.64   5 
   4  -1  -3 9493.48 1071.84   1 
  -4   1   3 10279.5 1794.35   2 
   4   1  -3 9585.41 1969.71   4 
  -4  -1  -3 12639.2 1770.48   1 
  -4  -1  -4 7900.61 2833.54   4 
   4  -1  -4 4799.48 1492.64   1 
  -4   1   4 4869.19 1364.52   3 
   4   1  -4 4404.56 1183.58   4 
  -4   1  -4 6177.01 1182.68   1 
  -4   1   4 4485.40 1272.65   2 
  -4  -1  -4 6268.72 1403.45   1 
  -4   1   4 3885.70 1032.35   1 
  -4  -1   5 56220.3 3710.05   5 
  -4   1   5 50905.7 3839.06   1 
  -4   1   5 62406.9 4859.30   3 
  -4  -1  -5 95412.7 10263.3   4 
   4   1  -5 39518.5 3278.14   4 
  -4   1  -5 71245.8 4554.70   1 
   4  -1  -5 49962.0 5204.31   1 
  -4  -1   5 46043.8 2195.06   1 
  -4  -1  -5 67958.9 5120.66   1 
   4   1  -5 44883.8 1786.75   1 
  -4   1   5 64863.6 4857.06   2 
  -4  -1  -6 44511.5 4508.16   1 
   4   1  -6 30623.4 1946.46   1 
   4   1  -6 11229.1 1379.54   4 
   4  -1  -6 26651.2 3969.64   1 
  -4   1  -6 40383.3 3695.38   1 
   4   1  -6 16357.4 1279.75   4 
  -4  -1  -6 57926.0 8368.60   4 
  -4   1   6 28295.5 3161.15   1 
  -4  -1   6 33643.9 2857.42   5 
  -4  -1   7 24342.0 2685.10   1 
  -4   1  -7 32730.2 3562.26   1 
  -4  -1  -7 42318.9 7481.01   4 
  -4  -1   7 28973.2 2613.79   5 
   4  -1  -7 18768.8 3517.26   1 
  -4  -1  -7 39601.9 4465.51   1 
   4   1  -7 27696.4 2214.69   1 
  -4  -1  -8 38454.3 4701.19   1 
   4  -1  -8 20812.5 3888.00   1 
  -4  -1  -8 53947.0 9155.49   4 
   4   1  -8 30970.1 2641.17   1 
  -4   1  -8 40514.8 4226.02   1 
  -4  -1   8 27088.3 2539.18   5 
  -4   1   9 2103.66 490.132  25 
  -4   1   9 2286.27 448.529  26 
  -4   1  -9 2316.97 422.475  23 
  -4  -1  -9 2368.30 1172.84   1 
   4  -1   9 2344.09 376.201   9 
   4   1   9 2446.70 339.584   6 
   4  -1  -9 1302.93 747.695   4 
  -4   1  -9 2032.73 391.590  10 
   4  -1  -9 1544.48 1094.23   1 
  -4  -1   9 2329.71 491.614  24 
   4  -1   9 2312.19 371.917  17 
  -4  -1  -9 2377.16 432.613  27 
  -4   1   9 1793.60 399.152  17 
  -4  -1   9 1347.58 556.310   5 
  -4   1   9 2297.85 375.280  20 
  -4   1   9 1938.78 457.952  24 
  -4  -1   9 1919.72 296.314  14 
  -4   1  -9 2500.19 1054.16   1 
  -4  -1   9 2078.35 444.241  26 
   4   1  -9 1866.88 736.997   1 
  -4  -1  -9 2253.57 486.240  12 
  -4  -1  -9 3329.47 2047.54   4 
  -4  -1   9 2150.18 469.829  25 
   4  -1   9 2489.72 325.729   6 
  -4  -1  -9 2573.92 504.721  23 
  -4  -1  10 3040.38 427.158  20 
   4  -1  10 2572.60 347.700  14 
   4  -1 -10 1488.60 1061.48   1 
  -4  -1  10 2433.63 478.854  26 
   4   1  10 2904.65 434.663  17 
  -4  -1  10 2231.91 445.023  17 
  -4   1  10 3025.84 438.975  20 
  -4  -1 -10 2879.75 485.642  27 
  -4   1  10 2818.30 495.478  26 
  -4  -1 -10 3043.15 578.919  12 
   4   1  10 2509.83 517.675  16 
  -4  -1  10 2058.13 492.083  16 
  -4  -1 -10 2518.44 458.402  10 
  -4   1 -10 2932.18 515.290  23 
  -4   1 -10 2357.87 443.791  12 
  -4  -1  10 2527.33 360.606  14 
  -4   1 -10 3223.88 1366.02   1 
   4  -1  10 2770.28 449.476  17 
  -4  -1 -10 3148.70 2005.88   4 
   4   1 -10 2025.35 824.561   1 
  -4   1  10 2632.56 360.393  14 
  -4   1  10 2546.37 385.369   8 
   4  -1  10 2757.95 414.434   9 
  -4   1  10 2336.25 472.172  17 
  -4   1  10 2583.07 541.429  25 
  -4   1 -10 2617.08 467.350  10 
  -4   1  10 2447.23 356.607   6 
   4   1  10 2871.60 372.604   6 
  -4  -1 -10 2551.01 494.955  23 
  -4   1  10 2522.20 549.778  24 
  -4  -1  10 2499.07 522.280  25 
   4   1  10 2689.65 369.245  14 
  -4  -1  10 2768.11 355.150   6 
   4  -1 -10 1065.88 913.727   4 
  -4  -1 -10 2333.04 1325.94   1 
   4  -1  10 3018.58 377.561   6 
   4  -1  10 2774.05 505.959  16 
  -4  -1  10 2547.54 532.468  24 
  -4  -1  11 2099.00 344.028  14 
  -4   1  11 2292.61 565.116  24 
  -4  -1 -11 2458.10 463.407  10 
  -4  -1  11 2019.21 459.397  26 
  -4  -1 -11 3446.56 2674.95   4 
  -4   1 -11 2539.44 465.306  23 
  -4  -1  11 2301.13 342.313   6 
  -4   1  11 1876.62 362.833   8 
   4  -1  11 2422.05 395.425   9 
  -4   1 -11 2112.22 447.187  10 
  -4  -1  11 2114.10 415.666  17 
  -4  -1 -11 2499.70 543.188  23 
   4  -1  11 2314.66 483.184  16 
  -4   1 -11 2124.75 1207.10   1 
  -4   1  11 2113.17 458.335  17 
   4   1  11 2074.17 498.803  16 
   4  -1 -11 1075.74 837.586   1 
  -4   1  11 2301.82 353.797   6 
  -4  -1  11 2004.78 482.982  16 
  -4   1  11 2148.56 344.414  14 
  -4  -1 -11 2068.58 510.034  12 
  -4   1  11 2067.61 498.797  25 
  -4  -1  11 2064.06 469.079  24 
   4  -1  11 2270.83 410.362  17 
   4   1  11 2666.69 431.690  17 
   4  -1  11 2534.88 373.049   6 
  -4  -1  11 2002.35 502.976  25 
   4   1  11 2211.27 346.602  14 
  -4  -1 -11 2859.43 1546.12   1 
  -4   1  11 2129.35 469.065  26 
   4   1  11 2436.92 365.935   6 
  -4   1 -11 2285.71 450.409  12 
   4  -1  11 2111.78 333.189  14 
  -4   1  12 28193.3 1656.86  26 
  -4   1 -12 28727.1 4463.41   1 
  -4   1  12 27080.8 1345.17   8 
  -4  -1 -12 24268.6 1579.60  10 
  -4  -1 -12 29499.2 5073.76   1 
  -4   1 -12 29122.6 1760.00  23 
   4   1  12 28806.1 1537.15  17 
   4   1  12 26571.7 1810.02  16 
  -4  -1  12 27723.7 1663.34  26 
  -4  -1  12 25402.1 1810.91  25 
   4  -1  12 26490.4 1231.82  14 
   4   1  12 26480.9 1302.95  14 
  -4  -1  12 27865.2 1867.01  16 
   4  -1  12 26923.3 1435.17   9 
   4  -1  12 28032.6 1324.54   6 
  -4  -1 -12 30037.3 1855.48  23 
  -4  -1 -12 33048.8 8572.64   4 
  -4  -1  12 29280.6 1292.90   6 
  -4   1  12 26164.1 1888.40  24 
   4  -1  12 28184.9 1572.13  17 
  -4   1  12 27419.8 1298.77  14 
  -4   1 -12 25376.3 1660.54  10 
  -4   1  12 25677.7 1674.15  17 
   4  -1  12 26889.2 1748.99  16 
  -4  -1  12 25004.3 1561.98  17 
  -4   1  12 28370.9 1306.43   6 
  -4  -1 -12 28385.4 1976.65  12 
  -4  -1  12 26636.0 1310.80  14 
  -4   1 -12 24551.9 1501.81  12 
  -4   1  12 25838.0 1889.27  25 
   4   1  12 29835.9 1341.20   6 
  -4  -1  12 26434.6 1841.14  24 
   4   1  12 28550.9 1440.68   9 
   4   1  13 12693.6 1266.15  16 
  -4   1  13 12507.8 924.840  14 
  -4  -1 -13 11128.8 1320.63  12 
  -4   1 -13 14259.9 1252.63  23 
  -4  -1 -13 13412.1 1288.09  23 
  -4   1  13 11571.7 1092.97  26 
   4   1  13 12144.8 1023.87   9 
   4  -1  13 12596.3 1242.22  16 
   4   1  13 13655.5 945.274   6 
   4  -1  13 14038.5 958.710   6 
  -4  -1  13 13433.8 917.798   6 
  -4  -1  13 12063.7 1280.05  25 
  -4  -1 -13 10755.6 1102.04  10 
  -4   1 -13 11665.1 1059.96  12 
   4  -1  13 11871.0 1003.75   9 
   4  -1  13 12796.5 1117.42  17 
  -4  -1 -13 15744.9 6471.00   4 
  -4  -1  13 12279.5 1151.86  26 
   4   1  13 12778.1 1071.39  17 
  -4  -1  13 11927.1 934.088  14 
  -4  -1  13 11715.4 1328.44  16 
  -4   1  13 11924.0 1310.12  25 
   4  -1  13 12607.8 896.635  14 
  -4   1 -13 11049.0 1128.73  10 
  -4   1  13 13380.6 935.623   6 
  -4   1  13 12237.5 1159.64  17 
  -4   1  13 11396.0 1271.44  24 
  -4  -1  13 12557.3 1316.99  24 
   4   1  13 12991.4 936.632  14 
  -4  -1  13 12186.0 1134.95  17 
   4  -1  14 31668.2 1657.18   9 
   4   1  14 31320.5 2072.20  16 
   4  -1  14 33854.2 1571.42   6 
   4   1  14 33481.3 1804.26  17 
  -4  -1  14 29673.1 1839.67  26 
  -4  -1  14 31556.0 1882.03  17 
  -4   1  14 30727.2 2162.78  25 
  -4   1 -14 28144.6 1906.78  10 
  -4  -1 -14 33794.7 2079.64  23 
  -4  -1 -14 30322.3 2104.30  12 
   4  -1  14 31256.3 1506.74  14 
  -4  -1  14 32994.5 1550.84   6 
  -4   1  14 31456.2 2260.30  16 
  -4   1  14 31511.7 1543.69  14 
  -4  -1 -14 27989.0 1861.64  10 
   4  -1  14 31392.5 2051.81  16 
  -4   1  14 27779.9 1857.04  17 
  -4   1  14 34856.2 1557.52   6 
  -4  -1  14 31381.6 2105.46  25 
  -4   1  14 29732.0 1788.77  26 
   4   1  14 33873.8 1571.79   6 
   4  -1  14 33007.4 1856.01  17 
  -4  -1  14 30785.0 2088.46  24 
  -4  -1  14 32008.9 1580.47  14 
  -4  -1  14 33460.5 2217.01  16 
   4   1  14 30715.9 1517.78  14 
   4   1  14 33228.9 1633.49   9 
  -4   1  14 30627.7 2176.69  24 
  -4  -1  15 16097.6 1398.88  17 
  -4  -1  15 15015.3 1537.93  16 
   4   1  15 16401.7 1110.67  14 
  -4  -1  15 16323.7 1346.49  26 
   4   1  15 16372.1 1296.60  17 
   4   1  15 14753.0 1465.83  16 
  -4   1 -15 15145.3 1406.86  10 
  -4  -1 -15 13276.9 1305.10  10 
  -4   1  15 16699.1 1120.01   6 
  -4  -1  15 15566.0 1128.26   6 
   4   1  15 15302.6 1161.92   9 
  -4   1  15 14951.6 1283.99  26 
  -4  -1 -15 16518.6 1456.85  23 
  -4  -1  15 14442.0 1452.84  21 
  -4  -1  15 15814.5 1517.04  25 
   4  -1  15 15516.7 1095.62  14 
  -4  -1  15 15490.6 1173.96  14 
  -4   1  15 16078.9 1132.59  14 
   4  -1 -15 10974.7 1731.57  12 
  -4  -1 -15 13841.5 1432.18  12 
  -4   1  15 13408.2 1599.72  16 
  -4   1  15 15444.2 1549.71  24 
  -4   1  15 14726.9 1377.78  17 
  -4   1  15 15395.1 1554.49  25 
   4   1  15 17251.1 1140.16   6 
   4  -1  15 17242.3 1153.87   6 
   4  -1  15 16297.1 1330.05  17 
  -4  -1  15 15056.4 1508.41  24 
   4  -1  15 16624.3 1229.61   9 
   4  -1  15 15274.1 1465.75  16 
  -4   1  16 754.096 340.236  26 
   4   1  16 804.799 301.918  17 
  -4   1  16 488.398 309.700  16 
  -4  -1 -16 1002.80 384.619  23 
   4  -1 -16 625.631 511.917  12 
  -4   1  16 1025.10 456.938  25 
  -4   1  16 813.968 253.579   6 
   4   1  16 835.452 260.026   6 
   4   1  16 583.520 321.983  16 
  -4  -1  16 898.538 420.080  25 
  -4  -1 -16 800.671 299.488  12 
   4   1  16 852.848 276.886   9 
  -4  -1  16 683.664 360.586  21 
  -4  -1  16 559.570 304.865  16 
   4   1  16 757.215 232.894  14 
  -4  -1 -16 714.118 308.834  10 
  -4   1  16 690.277 340.819  17 
  -4   1 -16 591.425 260.969  10 
  -4  -1  16 462.574 265.185  17 
   4  -1  16 813.448 317.168   9 
  -4   1  16 1011.90 281.868  14 
  -4  -1  16 861.920 361.838  24 
  -4  -1  16 746.128 288.309  14 
   4  -1  16 511.924 301.379  16 
   4  -1  16 643.835 220.461  14 
  -4   1  16 618.353 345.474  24 
   4  -1  16 898.054 302.942  17 
  -4  -1  16 804.396 377.550  26 
   4   1  17 529.371 191.118   9 
  -4   1  17 422.067 222.379  14 
   4   1  17 374.093 283.206  16 
  -4  -1 -17 375.029 227.402  12 
  -4   1  17 471.231 174.049   6 
  -4   1 -17 400.647 242.669  10 
   4  -1  17 479.671 253.509  14 
   4  -1  17 666.546 257.740  15 
  -4  -1  17 314.320 114.605  24 
   4  -1  17 351.020 215.286   9 
   4   1  17 507.821 204.007  14 
  -4  -1  17 204.975 192.044  21 
   4  -1 -17-40.6756 155.723  12 
  -4  -1  17 616.381 268.114  14 
  -4  -1  17 417.306 214.921  26 
  -4  -1 -17 506.793 230.447  10 
   4  -1  17 708.861 332.006  16 
  -4  -1  17 405.322 221.630  16 
  -4   1  17 339.401 226.480  16 
  -4   1  17 356.030 231.155  24 
  -4  -1  17 437.851 340.135  17 
  -4   1  17 471.299 204.686  17 
  -4   1  17 546.378 217.925  26 
   4   1  17 712.070 225.234   6 
  -4  -1  17 481.915 180.037  25 
  -4   1  17 428.973 237.864  25 
   4   1  17 642.866 235.472  17 
  -4  -1 -18 2232.89 530.660  12 
  -4   1  18 2567.52 655.457  16 
  -4   1  18 3226.50 623.967  17 
  -4   1  18 3116.35 653.728  24 
   4   1  18 3444.27 532.949   6 
  -4   1 -18 2892.65 621.917  10 
  -4   1  18 2839.92 645.277  25 
   4   1  18 3040.97 495.854   9 
  -4  -1  18 3256.01 564.613  14 
   4   1  18 2919.20 559.637  17 
  -4  -1  18 2962.62 613.656  25 
   4  -1  18 3238.70 526.597  14 
   4  -1  18 2804.52 532.538   9 
   4   1  18 2498.29 592.710  16 
   4  -1  18 3087.06 556.953  15 
   4   1  18 3383.16 511.456  14 
   4  -1  18 2747.13 664.313  16 
  -4   1  18 3148.73 556.373  26 
  -4  -1  18 2960.87 717.843  16 
  -4  -1 -18 2554.24 608.747  10 
   4  -1 -18 1307.27 559.525  12 
  -4   1  18 3340.91 681.758  21 
  -4   1  18 3084.09 512.657   6 
  -4  -1  18 3120.28 561.388  26 
  -4  -1  18 2769.25 564.208  17 
  -4   1  18 3246.64 540.672  14 
  -4  -1  18 2652.60 579.517  24 
  -4  -1  18 3136.04 650.160  21 
   4   1  19 591.644 301.931  16 
  -4  -1  19 880.264 252.290  14 
  -4   1  19 917.143 341.156  25 
   4  -1  19 792.309 300.845  16 
  -4   1  19 943.312 295.327  17 
  -4   1  19 627.929 257.733  16 
  -4   1  19 792.587 376.774  24 
   4   1  19 1140.16 357.226  17 
  -4  -1  19 896.306 371.025  16 
   4  -1  19 1166.58 313.733  15 
   4   1  19 1130.51 295.474   6 
   4   1  19 1228.52 290.153  14 
  -4   1  19 1092.08 325.246  14 
   4  -1  19 662.533 293.400   9 
  -4   1  19 866.611 303.819  26 
  -4  -1  19 1060.48 313.668  24 
   4  -1  19 987.305 295.578  14 
  -4  -1 -19 901.711 368.714  10 
  -4   1 -19 921.608 287.316  10 
  -4  -1  19 1135.49 350.941  21 
   4   1  19 1029.76 310.190  15 
  -4  -1  19 1035.65 340.858  17 
  -4   1  19 943.756 370.780  21 
  -4  -1  19 831.187 306.036  25 
  -4   1  20 53.5785 55.9391  24 
  -4  -1 -20 179.731 144.007  10 
  -4  -1  20-49.7465 112.101  14 
   4   1  20-138.317 168.210  15 
  -4  -1  20 165.680 192.737  16 
  -4  -1  20-94.8144 61.8534  24 
  -4   1  20 84.6789 128.610  21 
  -4   1  20 209.251 157.421  16 
  -4   1  20 57.7028 117.446  25 
  -4  -1  20 74.7127 168.117  25 
   4   1  20 85.6553 38.2874  14 
   4  -1  20-81.3067 118.778  16 
  -4  -1  20-3.66509 77.9910  21 
  -4  -1  20-46.8805 108.393  17 
   4   1  20-20.4967 95.0495  16 
   4  -1  20 140.542 52.4663  21 
  -4   1  20-129.841 181.615  17 
   4  -1  20-13.3827 78.7192  15 
  -4   1 -20-105.191 131.830  10 
   4  -1  20 17.3844 73.5837  14 
  -4   1  20 30.1975 53.0832  14 
  -4   1  21 23.7235 5.87827  14 
  -4   1  21 90.4159 59.9738  25 
  -4   1  21 149.347 131.052  16 
   4   1  21 219.405 133.805  15 
  -4  -1  21 113.105 90.3418  14 
   4   1  21 41.0669 71.6771  16 
   4  -1  21-45.8068 92.8471  14 
  -4   1 -21 406.318 205.995  10 
  -4   1  21-25.5983 66.6593  21 
  -4   1  21 333.817 164.730  17 
  -4  -1  21 176.698 170.173  25 
  -4   1  21 53.3486 56.6952  24 
  -4  -1  21 76.5036 41.9615  21 
   4  -1  21 60.7489 71.5282  21 
  -4  -1  21 117.391 177.032  24 
   4  -1  21 108.647 103.286  15 
   4   1  21 13.1697 46.9244  14 
  -4  -1  21 79.0058 21.0763  16 
  -4  -1  21 86.9168 84.4787  17 
   4  -1  21 28.2247 117.426  16 
  -4  -1 -21 38.3195 98.0944  10 
  -4  -1 -22 2454.04 400.461  10 
  -4   1  22 3835.18 497.333  17 
   4   1  22 4791.85 650.573  21 
  -4   1  22 4246.00 525.140  25 
  -4   1  22 4173.98 518.563  24 
  -4  -1  22 4252.54 523.924  24 
   4   1  22 5308.62 501.530  14 
   4  -1  22 5612.37 503.597  15 
   4   1  22 5574.13 497.232  15 
  -4   1  22 4429.10 576.675  21 
  -4  -1  22 4567.43 603.936  21 
  -4  -1  22 3868.49 576.600  16 
  -4  -1  22 3789.03 504.049  17 
   4  -1  22 3920.77 437.020  14 
  -4  -1  22 3865.76 498.665  25 
  -4  -1  22 4501.00 521.881  14 
   4  -1  22 4090.49 559.277  16 
   4   1  22 3334.86 498.341  16 
  -4   1  22 4925.60 527.176  14 
   4  -1  22 4625.60 624.141  21 
  -4   1 -22 3838.66 532.679  10 
  -4   1  22 3379.82 542.314  16 
   4   1 -23 1890.56 405.132  10 
  -5  -1   0-35.4089 106.234   1 
  -5  -1   0 211.588 190.076   3 
   5   1   0 344.914 575.830   4 
  -5   1   0 9.42929 104.653   1 
  -5  -1   0-56.0357 155.775   2 
   5   1   0-238.494 314.362   1 
   5  -1   0 127.778 180.728   1 
   5   1  -1 955.617 914.828   4 
  -5  -1   1 1113.16 538.994   2 
   5   1   1 435.010 182.144   1 
  -5  -1  -1 1075.96 383.552   1 
  -5   1  -1 885.417 336.350   1 
   5  -1  -1 861.433 367.073   1 
  -5  -1   1 1113.42 659.911   3 
   5   1  -1 646.147 496.113   5 
  -5   1   1 1227.77 702.419   3 
   5  -1  -1 1186.63 476.057   1 
   5   1  -1 1026.81 312.721   1 
   5   1  -1 604.199 363.762   1 
  -5   1   1 987.968 658.075   2 
   5  -1   1 964.111 459.140   1 
   5   1  -2 3283.75 950.404   5 
  -5   1  -2 3575.82 799.761   1 
  -5  -1   2 3310.96 1013.49   3 
  -5  -1  -2 4111.68 893.737   1 
   5  -1  -2 3304.70 970.085   1 
   5  -1   2 3920.81 976.047   1 
   5   1   2 3693.59 1261.34   1 
  -5   1   2 2827.38 1056.68   2 
  -5   1   2 2471.00 1030.76   3 
   5  -1  -2 3404.31 700.149   1 
  -5  -1  -2 5273.93 2271.58   4 
  -5  -1   2 3532.98 1068.89   2 
   5   1  -2 2998.86 1435.33   4 
  -5  -1   3 2712.70 956.344   2 
  -5  -1  -3 5070.32 2211.66   4 
   5   1  -3 2264.04 803.738   5 
  -5   1  -3 3076.98 789.280   1 
   5  -1  -3 1895.18 779.412   1 
   5  -1  -3 2426.26 573.910   1 
   5   1   3 2426.12 1068.01   1 
   5  -1  -3 2848.67 718.739   5 
  -5  -1  -3 3321.17 895.315   1 
  -5   1   3 2790.21 1035.65   2 
  -5  -1   3 2913.14 985.318   3 
  -5   1   3 2196.14 913.880   3 
   5   1  -3 2139.19 1295.42   4 
   5  -1  -4 14204.5 1451.09   1 
  -5  -1   4 17067.1 2648.18   3 
  -5   1  -4 19791.9 2262.44   1 
   5  -1  -4 15758.8 1385.41   5 
  -5   1   4 15345.0 2588.00   3 
  -5  -1   4 17200.9 2625.52   2 
   5   1  -4 12790.0 2585.96   4 
  -5   1   4 14642.4 2447.83   2 
   5  -1  -4 13318.7 2485.41   1 
  -5  -1  -4 19127.4 2435.92   1 
  -5  -1  -4 24358.0 5282.87   4 
  -5   1   5 248.187 513.461   2 
   5   1  -5 604.585 433.236   4 
  -5   1  -5 719.015 532.106   1 
   5  -1  -5 490.303 290.020   1 
  -5   1   5 735.797 616.623   3 
  -5  -1  -5 882.421 578.046   1 
  -5  -1  -5 909.201 336.080   4 
   5  -1  -5 492.733 463.228   1 
  -5  -1  -6 3110.05 1083.67   1 
   5  -1  -6 1205.20 772.461   1 
  -5   1  -6 4042.92 1154.87   1 
  -5   1   6 1897.37 971.225   3 
  -5   1   6 2564.62 1174.88   2 
   5   1  -6 653.417 429.039   4 
  -5   1   6 1417.62 683.288   1 
  -5  -1  -6 4384.90 2234.50   4 
   5   1  -7 38358.0 1770.12   1 
  -5   1  -7 65920.0 5200.43   1 
  -5  -1  -7 64340.5 5669.56   1 
   5  -1  -7 34684.4 4747.88   1 
  -5  -1  -7 76360.6 11084.3   4 
  -5  -1   8 29423.2 1724.64  24 
  -5  -1  -8 44635.6 8445.53   4 
  -5   1   8 32098.0 1435.12  20 
  -5  -1  -8 35227.9 1772.63  12 
  -5  -1  -8 30874.5 1791.77  23 
  -5   1   8 27900.2 1777.47  24 
  -5   1   8 28446.5 1540.74  17 
  -5  -1  -8 33187.2 1648.13  27 
   5  -1  -8 15253.5 3206.43   1 
  -5  -1   8 28805.1 1702.43  25 
  -5   1   8 29993.2 1639.11  26 
  -5   1   8 28114.2 1785.94  25 
  -5  -1   8 32969.8 1727.47  26 
  -5   1  -8 34056.9 1708.81  23 
  -5  -1  -8 34158.9 4388.45   1 
  -5   1  -8 29974.6 1510.20  10 
  -5   1  -8 34118.2 3911.69   1 
  -5  -1  -9 8150.51 2176.05   1 
  -5  -1  -9 9849.54 971.730  12 
  -5   1  -9 8566.92 772.179  12 
  -5  -1   9 8459.56 957.809  24 
  -5   1   9 8226.84 886.590  26 
  -5   1  -9 9556.14 923.593  23 
  -5   1  -9 9212.85 2144.01   1 
  -5   1   9 6874.97 814.866  17 
   5  -1  -9 3544.05 1531.17   1 
  -5  -1  -9 9358.15 887.913  27 
  -5  -1   9 8489.42 748.067  20 
  -5   1   9 8389.11 759.730  20 
   5   1   9 9494.92 651.587   6 
  -5   1   9 8126.12 597.681  14 
  -5   1   9 8293.34 979.035  24 
  -5   1   9 7435.20 935.993  25 
  -5  -1   9 7180.56 760.124  21 
   5  -1   9 9223.92 759.219   9 
   5  -1  -9 4319.47 1426.55   4 
  -5   1  -9 7853.09 790.047  10 
   5  -1   9 9282.20 783.435  17 
   5  -1   9 8074.08 806.641  16 
  -5   1   9 7487.23 653.000   8 
   5   1   9 7784.09 606.443  14 
  -5  -1   9 7023.33 780.265  17 
   5  -1   9 9043.46 635.524   6 
  -5  -1   9 8644.85 906.390  26 
  -5  -1  -9 8252.70 776.833  10 
  -5  -1  -9 12527.6 4602.16   4 
  -5  -1   9 8158.99 618.479  14 
   5   1   9 8635.82 700.035  17 
  -5  -1   9 7926.77 926.173  25 
  -5  -1  -9 9616.74 992.446  23 
   5  -1  10 14695.7 1146.60  16 
   5   1  10 14711.8 996.822  17 
  -5  -1 -10 15425.1 1324.60  23 
  -5   1 -10 13974.8 1134.48  10 
  -5  -1 -10 14294.0 1080.87  10 
   5   1  10 13709.1 854.547  14 
  -5   1  10 14855.2 936.428   8 
   5  -1  10 15092.5 1017.30   9 
  -5  -1  10 12521.7 1212.17  16 
  -5  -1  10 14105.1 1268.11  24 
  -5   1  10 13714.4 1312.67  24 
  -5  -1  10 13917.0 1273.01  25 
  -5  -1  10 13695.2 1108.04  17 
   5   1  10 15728.9 898.551   6 
   5  -1  10 13700.0 784.608  14 
   5  -1 -10 8134.41 2334.73   1 
  -5   1 -10 15424.4 1245.31  23 
  -5   1  10 14800.7 858.717  14 
  -5  -1 -10 16419.9 1216.27  27 
  -5   1  10 14744.0 845.262   6 
  -5  -1  10 15459.6 1049.58  20 
  -5   1  10 14731.5 1047.91  20 
  -5   1 -10 13259.3 1016.04  12 
  -5  -1 -10 16857.0 1339.27  12 
  -5  -1 -10 14347.5 3138.62   1 
   5  -1  10 14981.1 1062.31  17 
  -5  -1  10 13856.8 1082.33  21 
  -5  -1  10 13329.2 1213.75  26 
  -5   1  10 13102.4 1177.53  17 
  -5  -1 -10 19321.0 6505.09   4 
  -5   1 -10 13660.1 2810.62   1 
  -5  -1  10 13203.5 857.229  14 
   5  -1  10 14962.1 877.188   6 
  -5   1  10 13851.0 1327.23  25 
  -5   1  10 15158.6 1221.12  26 
   5   1  10 14052.4 1160.30  16 
   5   1  11 8364.06 684.884   6 
   5  -1  11 8502.67 696.135   6 
  -5  -1  11 7294.08 964.886  25 
   5  -1  11 7733.54 632.538  14 
  -5   1  11 7867.03 672.254  14 
  -5   1  11 6334.19 682.515   8 
  -5   1  11 7279.89 1000.97  25 
  -5  -1 -11 6876.53 2334.68   1 
  -5   1 -11 7068.57 787.823  12 
  -5  -1 -11 8823.70 4577.94   4 
  -5  -1  11 6819.55 857.177  26 
  -5  -1  11 8053.23 633.494   6 
  -5   1  11 7560.76 875.125  17 
  -5  -1  11 7151.46 850.504  17 
  -5  -1  11 7425.69 670.629  14 
  -5  -1 -11 8635.34 1002.89  23 
  -5   1  11 8368.78 820.117  20 
   5   1  11 7144.45 899.913  16 
   5   1  11 7928.89 667.171  14 
  -5  -1 -11 7541.78 834.238  10 
   5   1  11 8896.91 803.136  17 
   5  -1  11 7816.71 768.090   9 
  -5  -1  11 7130.27 820.967  21 
  -5   1 -11 8332.41 924.646  23 
  -5   1  11 7196.67 1011.66  24 
   5  -1  11 8120.23 805.310  17 
  -5  -1  11 7229.00 947.512  16 
  -5   1  11 8194.41 654.242   6 
  -5   1 -11 8672.62 2281.89   1 
  -5   1 -11 7546.39 847.412  10 
  -5  -1  11 7242.55 971.842  24 
  -5   1  11 7727.12 928.394  26 
  -5  -1 -11 8101.14 989.843  12 
   5  -1  11 7596.50 873.928  16 
  -5   1 -12 1448.97 347.493  12 
  -5  -1  12 1614.95 442.080  26 
   5  -1  12 1478.40 420.943  16 
  -5   1  12 1662.59 307.389  14 
  -5   1  12 1159.09 349.357  17 
  -5  -1  12 1298.76 379.294  17 
  -5   1 -12 2262.70 1209.20   1 
  -5   1  12 1465.95 436.058  25 
  -5   1  12 1724.06 321.299   6 
   5   1  12 1647.94 306.390  14 
  -5  -1  12 1445.56 473.471  25 
  -5  -1  12 1413.43 321.990  14 
  -5  -1  12 1532.98 284.767   6 
   5  -1  12 1455.40 279.594  14 
  -5  -1 -12 1680.37 444.961  23 
  -5   1 -12 1989.97 456.265  23 
  -5  -1 -12 1174.29 979.867   1 
  -5   1  12 1288.16 333.608   8 
   5  -1  12 1737.88 404.808  17 
  -5   1  12 1372.17 410.243  24 
   5   1  12 1567.18 441.008  16 
  -5  -1  12 1350.36 475.653  24 
   5   1  12 1655.15 344.040  17 
  -5  -1  12 1347.26 439.049  16 
  -5   1 -12 1611.62 401.730  10 
   5   1  12 1613.00 311.142   6 
  -5  -1 -12 1547.38 375.711  10 
  -5  -1  12 1226.24 355.221  21 
   5  -1  12 1503.75 349.313   9 
  -5   1  12 1925.80 468.840  26 
  -5  -1 -12 1532.93 394.214  12 
   5  -1  12 1645.61 313.666   6 
  -5   1  13 16.5978 42.9296  17 
  -5  -1 -13-121.258 168.312  23 
  -5  -1  13 164.130 226.537  25 
  -5  -1  13-181.159 92.2112  21 
  -5   1  13 145.190 94.1043  16 
  -5  -1  13-0.56499 27.3975  14 
  -5   1  13-146.783 126.476   6 
  -5   1 -13 78.9465 206.007  10 
  -5   1 -13-117.191 94.2374  12 
   5   1  13 27.7616 58.7942  14 
   5   1  13-22.8018 53.9707  17 
  -5   1  13-139.434 160.974  24 
   5  -1  13 73.1675 126.238   6 
  -5  -1 -13 15.5981 93.2609  12 
   5   1  13-30.4916 81.6755   6 
   5  -1  13 63.5462 112.788  16 
  -5  -1  13-91.0803 230.812  24 
  -5   1  13 101.145 116.199  14 
   5  -1  13-49.6507 113.984   9 
  -5   1  13 1.16033 150.865  25 
   5  -1  13 19.2444 80.3608  14 
  -5   1  13-29.6243 165.284  26 
  -5  -1  13-41.1222 104.674  17 
   5   1  13 182.731 155.141   9 
  -5  -1  13-100.007 133.545  16 
   5   1  13 10.2120 110.519  16 
  -5  -1  13-213.478 170.172  26 
  -5   1 -13-26.2633 46.9327  23 
  -5  -1 -13-104.691 68.9141  10 
  -5  -1  13 121.141 67.7478   6 
   5  -1  13-56.6100 16.6857  17 
  -5   1  14 50008.8 1846.72   6 
   5   1  14 50346.4 2202.20  17 
   5   1  14 49439.4 1889.54   6 
  -5   1  14 45553.2 2713.96  16 
  -5  -1  14 45779.4 1918.62  14 
   5   1  14 44042.7 2432.45  16 
  -5   1 -14 41830.9 2313.48  10 
   5  -1  14 45488.1 2063.00   9 
  -5   1  14 43762.2 2663.82  24 
   5  -1  14 48986.8 2258.47  17 
  -5  -1  14 44499.3 2570.82  16 
   5   1  14 47079.3 1829.69  14 
  -5  -1  14 45362.9 2299.72  17 
   5  -1  14 46724.9 1802.68  14 
  -5  -1  14 44107.0 2376.50  21 
  -5   1  14 43143.4 2262.68  26 
  -5  -1  14 45470.9 2617.27  24 
  -5  -1 -14 43466.2 2350.82  12 
   5  -1  14 49149.9 1909.00   6 
  -5   1  14 40571.6 2254.78  17 
   5  -1  14 43734.7 2392.78  16 
  -5  -1  14 45211.7 1801.04   6 
  -5   1  14 44401.5 2694.62  25 
   5   1  14 48293.8 2059.97   9 
  -5  -1 -14 49922.0 2569.22  23 
  -5  -1  14 48146.8 2391.95  26 
  -5   1  14 48429.6 1899.34  14 
  -5  -1  14 44612.1 2579.28  25 
  -5  -1 -14 40834.2 2220.02  10 
  -5  -1  15 3739.81 723.478  17 
   5   1  15 4385.25 565.244  14 
  -5   1  15 3232.12 793.746  16 
   5   1  15 4143.45 632.234   9 
  -5  -1  15 4123.32 810.366  16 
  -5  -1  15 4001.55 732.245  21 
   5  -1  15 4427.83 641.268   9 
  -5   1  15 4324.74 714.709  26 
   5   1  15 4237.46 642.989  17 
  -5   1 -15 4381.76 723.110  10 
  -5   1  15 4542.57 591.536  14 
  -5  -1  15 4559.43 857.273  25 
  -5   1  15 3770.79 693.854  17 
  -5   1  15 4135.08 811.723  25 
  -5  -1 -15 4044.16 721.655  12 
   5  -1 -15 2441.27 911.033  12 
  -5  -1 -15 3846.38 690.841  10 
  -5  -1 -15 5093.21 781.235  23 
  -5   1  15 4530.44 582.305   6 
   5   1  15 3932.11 777.346  16 
  -5   1  15 4316.94 835.981  24 
   5   1  15 4941.25 605.409   6 
   5  -1  15 4039.82 766.844  16 
   5  -1  15 4352.04 570.470  14 
  -5  -1  15 4349.44 613.727  14 
  -5  -1  15 3580.11 680.650  26 
  -5  -1  15 4334.23 831.870  24 
   5   1  16 601.668 281.990  16 
  -5  -1  16 448.466 219.150  17 
   5  -1  16 372.339 235.826  16 
   5  -1  16 297.678 184.159   9 
   5  -1  16 489.312 232.557  15 
   5  -1 -16 335.982 363.810  12 
   5  -1  16 402.961 147.785  14 
  -5  -1 -16 561.047 264.069  23 
  -5  -1  16 438.738 257.139  24 
  -5  -1  16 299.736 195.592  26 
  -5   1  16 331.178 63.2492  25 
  -5  -1  16 439.096 222.977  25 
  -5  -1 -16 473.722 307.755  12 
   5   1  16 402.182 191.887   6 
  -5   1  16 404.779 172.366  14 
  -5   1  16 399.155 237.071  26 
  -5  -1  16 394.994 155.862  14 
  -5  -1  16 361.428 229.270  16 
  -5   1  16 341.578 237.222  16 
   5   1  16 498.313 205.936   9 
  -5  -1 -16 479.207 275.900  10 
  -5   1 -16 460.704 324.850  10 
  -5   1  16 531.786 313.375  24 
  -5   1  16 120.771 142.804  17 
  -5   1  16 485.638 173.583   6 
   5   1  16 452.760 193.085  14 
   5   1  16 390.777 219.352  17 
  -5  -1  16 456.674 225.086  21 
  -5   1 -17 169.011 103.928  10 
  -5  -1  17-104.612 129.786  24 
  -5   1  17-165.711 145.809   6 
   5  -1  17 209.632 98.2979  15 
  -5   1  17 133.717 115.282  21 
  -5   1  17 243.054 206.356  17 
  -5   1  17-141.492 149.053  16 
   5  -1  17 67.8206 139.597   9 
  -5   1  17-27.2126 7.48288  14 
   5  -1 -17 23.5379 35.3563  12 
  -5  -1  17 36.9367 79.3197  16 
  -5  -1  17 55.7215 88.6522  21 
   5   1  17 122.865 44.6449  17 
  -5  -1  17 29.5963 11.1032  14 
   5   1  17 76.2526 84.8874   9 
  -5  -1  17-75.1960 178.774  25 
  -5  -1 -17-52.1042 60.3398  10 
   5   1  17 70.2666 87.4327  16 
  -5   1  17 145.783 203.304  25 
  -5   1  17 24.0139 16.4536  26 
  -5  -1  17-53.1174 109.538  17 
   5  -1  17-6.94347 110.225  14 
  -5  -1 -17 309.432 251.039  12 
   5   1  17 60.6525 109.777   6 
   5  -1  17 24.3861 145.419  16 
  -5  -1  17-172.109 114.075  26 
   5   1  17-167.448 163.416  14 
  -5   1  17-182.560 265.533  24 
  -5   1  18 2701.24 609.610  24 
   5  -1  18 3077.96 487.656  15 
   5  -1 -18 1158.66 559.468  12 
  -5  -1  18 2466.87 593.621  16 
  -5  -1 -18 2237.86 496.962  12 
  -5   1  18 2478.64 529.706  26 
  -5  -1  18 2429.22 570.683  21 
  -5   1 -18 2813.62 582.133  10 
   5  -1  18 2433.51 512.166   9 
   5   1  18 2694.37 470.032   9 
   5   1  18 2436.31 583.215  16 
  -5  -1  18 2608.61 612.304  25 
  -5   1  18 2649.82 456.548   6 
  -5   1  18 2729.91 613.664  25 
   5   1  18 2703.39 459.822  14 
  -5   1  18 3175.99 498.957  14 
  -5  -1  18 2932.93 518.328  14 
   5  -1  18 2931.38 494.967  14 
  -5   1  18 2574.74 556.616  17 
  -5   1  18 3267.02 617.913  21 
  -5   1  18 2493.51 610.377  16 
  -5  -1  18 2717.06 538.579  26 
  -5  -1  18 2653.64 590.607  24 
  -5  -1  18 2416.68 496.967  17 
  -5  -1 -18 2349.05 554.519  10 
   5  -1  18 2248.37 560.207  16 
   5   1  18 2918.47 470.947   6 
  -5   1  19 130.501 155.812  21 
   5   1  19 83.7355 117.530  16 
  -5  -1 -19-155.395 115.366  10 
   5  -1  19 28.1862 77.1377  15 
  -5   1  19 62.5218 119.576  16 
  -5  -1  19-159.583 138.359  16 
  -5   1  19 27.4294 130.812  17 
   5  -1  19 17.3118 68.9733  14 
  -5  -1  19 61.4087 72.8480  21 
  -5   1  19 96.4164 137.306  24 
  -5  -1  19 30.6046 70.0779  26 
   5   1  19 121.783 69.8680  15 
   5  -1  19-116.839 115.977  16 
  -5  -1  19 112.626 167.802  24 
  -5  -1  19-10.6534 162.321  25 
   5   1  19 86.2487 33.9543  14 
   5   1  19 173.762 89.4604   9 
  -5   1 -19 78.1462 160.118  10 
   5  -1  19 122.653 80.1302   9 
  -5  -1  19 26.5299 109.517  17 
  -5  -1  19 30.5180 57.8737  14 
  -5   1  19 163.462 50.3901  25 
  -5   1  19 105.109 70.7077  14 
  -5   1  19 141.947 167.530  26 
  -5   1  20 15444.8 1306.66  25 
  -5   1  20 13307.2 1288.03  16 
  -5   1  20 15129.5 1244.16  21 
  -5   1 -20 13428.5 1254.38  10 
   5  -1  20 17413.1 1375.48  21 
  -5  -1  20 15047.9 1277.74  24 
  -5  -1  20 15820.6 1293.21  21 
  -5  -1  20 13525.6 1133.42  17 
   5   1  20 17344.1 1035.78  14 
  -5  -1 -20 12487.1 1072.77  10 
   5   1  20 12425.3 1135.17  16 
   5  -1  20 13665.5 1183.94  16 
  -5   1  20 17195.6 1100.85  14 
  -5  -1  20 15130.2 1281.33  25 
  -5   1  20 15231.8 1290.63  24 
   5   1  20 16989.2 1112.28  15 
   5  -1  20 16007.1 995.500  14 
   5  -1  20 17396.8 1141.78  15 
  -5  -1  20 13907.9 1275.68  16 
  -5  -1  20 16325.6 1141.49  14 
  -5   1  20 14873.5 1200.68  17 
  -5   1  21 5487.46 661.926  17 
  -5   1 -21 5491.65 675.331  10 
  -5   1  21 6009.43 703.311  21 
   5   1  21 7218.92 610.651  14 
   5  -1  21 5527.85 679.875  16 
   5   1  21 5004.95 626.951  16 
  -5   1  21 6922.76 661.119  14 
  -5  -1  21 6625.32 680.389  14 
  -5  -1  21 6269.39 729.068  25 
  -5  -1  21 6154.07 724.703  24 
  -5   1  21 6369.59 754.426  24 
  -5   1  21 6482.84 763.631  25 
  -5  -1  21 5321.09 633.181  17 
  -5  -1  21 5253.29 726.421  16 
  -5   1  21 5207.18 752.424  16 
  -5  -1  21 6381.92 745.355  21 
   5   1  21 7643.29 663.187  15 
   5  -1  21 7858.37 670.248  15 
   5  -1  21 6588.44 802.145  21 
  -5  -1 -21 4399.75 594.441  10 
   5   1  22 8377.40 605.650  15 
  -5   1 -22 5841.51 641.264  10 
   5   1  22 7496.54 757.617  21 
   5  -1  22 8922.91 634.950  15 
  -5  -1  22 6292.00 634.906  25 
  -5   1  22 6777.08 651.114  25 
  -5  -1  22 6003.55 616.087  21 
   5  -1  22 7374.69 720.145  21 
  -5   1  22 6824.67 656.708  24 
  -5  -1  22 5553.64 618.591  16 
  -5   1  22 7870.21 624.212  14 
   5  -1  22 5243.43 559.098  16 
  -5   1  22 5148.72 617.999  16 
  -5   1  22 4745.53 546.233  17 
  -5  -1  22 6161.21 630.336  24 
  -6  -1   0 35745.8 3594.60   2 
   6   1   0 27179.0 3143.66   1 
  -6  -1   0 40426.3 1981.98   1 
  -6   1   0 37710.0 4132.22   3 
  -6   1   0 36016.0 3956.52   2 
  -6  -1   0 37731.2 3810.14   3 
   6  -1   0 36086.3 2991.84   1 
   6   1   1 17380.3 2809.20   1 
   6   1  -1 21439.4 1624.41   1 
  -6   1  -1 20127.1 1917.78   1 
  -6   1   1 20029.1 2942.84   2 
  -6  -1  -1 18876.0 2590.19   2 
  -6  -1  -1 22781.9 2948.79   3 
   6  -1  -1 19300.1 1972.45   1 
   6  -1  -1 23211.1 2631.50   1 
  -6  -1  -1 21680.1 1763.50   1 
   6   1  -1 8191.15 1451.63   1 
  -6  -1   1 20118.4 2771.94   3 
  -6   1   1 17515.1 2795.83   3 
  -6  -1   1 20299.2 2724.17   2 
   6   1   2 15440.1 2989.98   1 
  -6  -1  -2 21291.6 2036.37   1 
   6  -1  -2 15570.8 2341.79   5 
   6  -1  -2 14706.6 1624.47   1 
   6  -1  -2 18041.6 2489.18   1 
  -6   1  -2 19066.7 2010.38   1 
  -6   1   2 15825.3 2618.05   2 
   6   1  -2 15036.0 3819.47   4 
  -6   1   2 15990.6 2705.55   3 
  -6  -1   2 18516.0 2716.11   3 
  -6  -1   2 18049.1 2637.32   2 
  -6  -1  -3 2545.56 792.109   1 
   6  -1  -3 1969.20 718.967   5 
  -6  -1   3 2098.64 954.803   2 
   6  -1  -3 1640.58 541.505   1 
  -6   1   3 1694.83 905.431   2 
   6  -1  -3 1951.44 859.892   1 
  -6   1   3 1455.10 837.222   3 
  -6  -1   3 1973.62 896.142   3 
  -6   1  -3 2566.63 816.274   1 
   6   1  -3 1787.71 1333.78   4 
  -6  -1   4 6112.43 1744.42   3 
  -6   1   4 5755.89 1705.12   2 
   6  -1  -4 4957.98 919.342   1 
  -6   1  -4 8731.86 1568.72   1 
  -6   1   4 6054.13 1683.45   3 
  -6  -1  -4 7744.19 1536.41   1 
   6   1  -4 5131.98 1939.75   4 
   6  -1  -4 4670.46 1496.08   1 
  -6  -1   4 6139.22 1733.74   2 
   6  -1  -4 6652.25 1125.13   5 
  -6   1   5 14255.6 2790.41   3 
  -6   1   5 13966.4 2756.18   2 
   6  -1  -5 9753.04 2337.06   1 
  -6  -1  -5 16607.3 2465.53   1 
  -6   1  -5 18253.5 2419.28   1 
  -6   1   6 115600. 8116.42   3 
  -6  -1  -6 147626. 3614.76  27 
  -6  -1  -6 199385. 17994.6   4 
   6  -1  -6 59935.9 5902.02   1 
  -6   1  -6 125204. 3213.04  23 
  -6  -1  -6 161250. 3957.72  23 
  -6  -1  -6 111898. 7081.45   1 
  -6   1   6 133272. 2955.34  20 
  -6   1  -6 177949. 3714.99  27 
  -6   1   6 115762. 3388.40  26 
  -6  -1  -6 137868. 3128.54  12 
  -6   1  -6 132038. 2914.13  10 
  -6   1  -6 137863. 7311.52   1 
  -6   1   6 119813. 8169.30   2 
  -6   1   7 48665.5 2216.86  26 
  -6  -1   7 46911.6 2147.23  25 
  -6  -1  -7 51587.6 5069.81   1 
  -6  -1  -7 73850.9 11348.5   4 
  -6   1  -7 41411.6 1906.66  23 
  -6   1   7 46776.6 2265.77  25 
  -6   1   7 46426.1 2269.58  24 
   6  -1  -7 21894.7 3644.13   1 
  -6  -1   7 50975.4 2246.72  26 
  -6  -1  -7 56641.7 2423.37  23 
  -6  -1   7 46543.4 2145.81  24 
  -6  -1  -7 50939.1 2022.13  12 
  -6   1  -7 48069.6 1843.04  10 
  -6  -1  -7 57004.9 2277.72  27 
  -6   1   7 49533.5 1853.89  20 
  -6   1  -7 46751.5 4532.47   1 
  -6   1  -7 49337.1 1765.45  12 
  -6  -1   7 48689.6 1795.80  20 
  -6  -1  -8 14713.6 992.692  10 
  -6   1  -8 16882.9 1237.20  23 
  -6  -1  -8 16984.0 1359.70  23 
  -6  -1   8 14057.7 1228.23  25 
  -6  -1  -8 17644.5 1263.50  27 
  -6  -1   8 15590.9 1036.02  20 
  -6  -1   8 14221.8 1239.96  24 
  -6  -1  -8 15757.4 2973.35   1 
  -6  -1  -8 15825.5 1125.52  12 
  -6   1   8 13078.6 883.481   8 
  -6   1   8 14152.5 1033.98  20 
  -6  -1   8 12826.2 804.338  14 
  -6   1   8 15261.1 1240.30  26 
  -6   1  -8 12805.5 2513.03   1 
  -6   1   8 13724.7 1292.14  25 
  -6   1  -8 15242.4 1070.09  10 
  -6  -1  -8 14842.6 1561.29  18 
  -6   1   8 14661.8 1136.58  17 
  -6   1   8 13535.8 1298.55  24 
  -6   1  -8 15393.0 1014.45  12 
  -6  -1   8 14571.7 1201.39  26 
  -6  -1  -9 4166.27 601.942  12 
  -6   1   9 3511.13 593.864  26 
  -6  -1  -9 3336.70 781.676  18 
  -6  -1  -9 4632.90 3247.99   4 
  -6  -1  -9 3826.52 1594.76   1 
  -6   1   9 2852.29 569.135  17 
  -6  -1   9 3739.26 612.692  26 
  -6   1   9 3486.02 682.323  25 
   6   1   9 3919.48 419.245   6 
   6  -1   9 3754.02 412.511   6 
  -6   1  -9 3631.88 504.433  12 
  -6   1   9 3481.56 459.662   8 
  -6   1   9 3727.64 509.358  20 
   6  -1   9 3780.52 508.361   9 
  -6   1   9 3275.57 664.287  24 
  -6  -1   9 3947.91 525.568  20 
  -6  -1   9 3720.92 568.148  17 
   6   1   9 4053.51 486.957  17 
  -6  -1   9 3345.32 625.450  24 
  -6  -1   9 3854.79 675.817  25 
  -6   1   9 3614.50 418.730  14 
  -6  -1   9 3708.63 430.260  14 
  -6  -1  -9 4532.44 719.473  23 
  -6   1  -9 3667.98 535.965  10 
  -6  -1   9 3603.95 530.564  21 
  -6  -1  -9 4047.94 552.838  10 
  -6   1  -9 4191.04 1403.82   1 
  -6  -1  -9 4435.61 622.372  27 
  -6   1  -9 4748.31 649.568  23 
  -6  -1  10 1715.21 336.457  14 
  -6   1  10 1806.00 525.655  25 
  -6   1 -10 1953.42 414.928  10 
  -6   1 -10 1518.79 892.391   1 
  -6   1  10 1544.03 338.643   8 
   6   1  10 2006.25 326.796   6 
  -6   1  10 1710.38 483.335  24 
   6  -1  10 1945.69 324.365   6 
  -6  -1  10 2296.55 499.588  26 
  -6  -1 -10 2395.22 1296.01   1 
  -6  -1  10 1633.74 437.277  16 
  -6  -1  10 1805.49 467.606  25 
  -6   1  10 1999.42 499.541  26 
  -6  -1 -10 2304.97 431.406  10 
  -6  -1  10 2136.77 419.863  21 
  -6  -1  10 1795.08 396.802  17 
  -6  -1 -10 2411.14 449.088  27 
  -6   1 -10 2126.63 404.799  12 
  -6  -1 -10 2054.38 421.840  12 
  -6  -1 -10 2410.21 518.708  23 
   6   1  10 1904.25 321.448  14 
  -6  -1  10 1905.90 487.903  24 
   6   1  10 2351.17 376.608  17 
  -6   1  10 1788.32 306.143  14 
  -6   1  10 1802.82 381.360  20 
   6  -1  10 1624.54 373.530  16 
  -6   1 -10 2147.94 443.027  23 
  -6  -1  10 2226.64 436.485  20 
  -6   1  10 1733.49 419.513  17 
   6  -1  10 2208.49 401.992   9 
  -6  -1  11 1595.08 436.717  16 
  -6   1 -11 1803.75 1116.87   1 
  -6   1  11 1515.03 293.664  14 
  -6   1 -11 2087.58 488.925  23 
  -6  -1  11 1352.74 442.792  24 
  -6  -1 -11 2231.68 494.975  23 
  -6  -1  11 1588.46 370.842  20 
  -6  -1  11 1725.86 514.041  25 
  -6   1  11 1726.27 520.602  24 
  -6   1 -11 1590.06 388.544  10 
  -6  -1 -11 1555.41 366.256  10 
  -6  -1 -11 1802.68 445.731  12 
  -6  -1  11 1657.30 305.316  14 
  -6   1  11 1453.00 482.436  25 
  -6   1  11 1426.26 389.195  17 
  -6  -1  11 1244.61 377.091  17 
   6  -1  11 1378.71 383.024  16 
   6   1  11 1837.06 307.151  14 
   6   1  11 1763.92 351.009  17 
   6   1  11 1863.41 324.870   6 
  -6   1  11 1414.53 313.149   8 
  -6  -1 -11 1208.46 1091.47   1 
  -6   1 -11 1882.45 371.864  12 
  -6  -1  11 1700.06 454.513  26 
  -6   1  11 1888.07 418.060  20 
   6  -1  11 1754.12 298.941   6 
  -6  -1  11 1409.87 364.640  21 
   6  -1  11 1576.65 360.955   9 
  -6   1  11 1653.97 454.957  26 
  -6   1 -12 26632.6 1543.14  12 
  -6  -1  12 25431.0 1324.62  14 
   6  -1  12 26042.9 1533.13   9 
  -6  -1  12 26441.8 1944.32  24 
  -6   1  12 25135.3 1973.46  24 
  -6   1  12 26087.7 1745.27  17 
  -6   1  12 26938.0 1784.02  26 
  -6   1  12 26357.8 1303.11  14 
  -6  -1  12 27594.4 1793.39  26 
   6   1  12 28895.4 1328.56   6 
   6  -1  12 25448.1 1618.81  16 
  -6  -1 -12 26484.3 1645.03  10 
  -6  -1 -12 26580.4 1729.63  12 
   6   1  12 26863.2 1289.12  14 
  -6   1 -12 25865.9 1681.11  10 
  -6   1  12 23068.3 1322.46   8 
  -6  -1  12 25651.6 1642.12  21 
  -6  -1 -12 27059.3 1904.21  23 
  -6  -1  12 24213.9 1783.46  16 
   6   1  12 23398.6 1672.91  16 
   6   1  12 27541.4 1505.10  17 
  -6  -1  12 25134.1 1641.34  17 
   6  -1  12 27285.3 1306.13   6 
  -6  -1  12 25718.5 1920.84  25 
  -6   1  12 25321.6 1984.05  25 
  -6   1 -12 30140.8 1921.57  23 
   6   1  13 10493.4 978.911  17 
  -6  -1 -13 12223.3 1280.03  23 
  -6   1  13 10457.5 868.613  14 
  -6  -1  13 10124.9 1211.34  24 
  -6  -1  13 9677.69 1208.24  25 
  -6   1  13 9271.24 1253.27  24 
   6   1  13 10324.9 822.357  14 
  -6  -1  13 9669.54 1143.15  16 
   6   1  13 11424.2 871.764   6 
  -6  -1  13 9298.47 1042.03  21 
   6   1  13 9843.64 1071.25  16 
   6   1  13 11003.0 986.171   9 
  -6   1  13 10661.8 801.670   6 
  -6   1 -13 12610.5 1243.31  23 
  -6  -1 -13 10092.9 1094.95  12 
  -6   1  13 9924.57 1080.75  17 
  -6   1  13 8405.29 1183.46  16 
  -6  -1  13 9770.79 877.615  14 
  -6  -1  13 11053.0 1151.30  26 
  -6  -1  13 8503.05 1000.53  17 
  -6   1  13 9642.30 1044.11  21 
   6  -1  13 10532.3 961.766   9 
  -6   1  13 9095.37 1060.08  26 
  -6   1 -13 9897.17 963.892  12 
  -6  -1 -13 9858.33 1033.87  10 
  -6   1  13 9916.12 875.034   8 
  -6   1 -13 9616.25 1029.84  10 
   6  -1  13 9628.54 1042.87  16 
  -6   1  13 9820.02 1314.69  25 
  -6   1  14 747.931 391.019  25 
  -6   1  14 856.312 332.807  21 
  -6   1  14 830.883 240.768   6 
   6   1  14 851.955 245.975  14 
  -6  -1 -14 1001.04 349.426  10 
   6   1  14 749.861 278.694  16 
  -6  -1 -14 847.248 333.779  12 
  -6   1 -14 532.159 249.599  12 
   6   1  14 1085.39 326.511   9 
  -6  -1  14 656.271 254.648  25 
  -6   1  14 938.689 295.669  14 
  -6  -1  14 661.904 304.614  21 
  -6  -1  14 847.589 380.342  16 
  -6  -1  14 792.600 241.880  14 
  -6   1  14 597.737 329.818  16 
   6  -1  14 990.885 310.386   9 
  -6   1 -14 897.145 312.305  10 
  -6  -1  14 865.880 365.804  24 
  -6   1  14 811.830 371.181  24 
  -6   1  14 741.234 333.171  17 
  -6  -1 -14 1298.06 415.643  23 
  -6  -1  14 627.222 274.549  17 
  -6   1  14 706.275 337.969  26 
   6   1  14 867.887 233.632   6 
   6  -1  14 753.042 266.474  16 
  -6  -1  14 763.030 295.459  26 
  -6   1  15 0.64661 179.754  24 
  -6  -1  15 272.574 182.229  17 
  -6  -1 -15 10.8667 101.066  12 
  -6   1  15-319.296 224.635  17 
   6  -1  15-16.5312 108.444   9 
  -6   1  15 62.0016 90.7998  26 
  -6   1  15 68.4524 23.0232  25 
   6   1  15 26.0875 48.9099   6 
  -6  -1  15 243.979 207.266  21 
  -6  -1  15-151.376 234.022  16 
  -6   1  15 83.6691 123.352   6 
  -6   1  15-201.630 156.804  21 
  -6  -1  15 4.79226 83.2634  25 
   6   1  15-0.36737 91.6815   9 
   6   1  15 19.5413 68.8135  16 
   6   1  15 82.4907 113.689  14 
  -6   1  15 55.8708 113.745  16 
  -6   1 -15-113.256 150.270  10 
   6  -1  15 52.8824 46.9913  14 
  -6  -1  15-30.0997 108.044  14 
  -6  -1  15-9.00238 198.656  24 
   6  -1  15-44.6213 74.5622  16 
  -6  -1 -15-181.598 202.796  23 
  -6  -1  15-137.598 130.246  26 
  -6  -1 -15 93.9073 90.6309  10 
  -6   1  15-128.318 120.253  14 
   6  -1 -16 2030.87 755.112  12 
  -6   1  16 2602.51 590.826  17 
   6   1  16 3567.35 558.961   9 
   6   1  16 2509.74 575.744  16 
  -6  -1  16 3011.00 651.604  26 
  -6   1  16 3420.38 746.208  24 
  -6   1  16 3250.84 475.449   6 
  -6  -1  16 2939.82 676.953  24 
   6  -1  16 2582.45 610.141  16 
   6   1  16 3587.84 515.413   6 
  -6  -1  16 2721.40 587.853  21 
   6  -1  16 3239.57 465.655  14 
  -6  -1  16 2706.43 620.341  16 
  -6   1  16 3215.27 646.225  21 
  -6  -1  16 2951.38 548.308  14 
  -6   1 -16 3281.90 617.123  10 
  -6  -1  16 2664.25 531.836  17 
  -6  -1 -16 3971.23 696.604  23 
  -6  -1 -16 2989.30 597.700  10 
  -6  -1  16 3015.73 681.366  25 
  -6   1  16 3094.00 696.888  25 
   6  -1  16 3519.76 560.285  15 
  -6  -1 -16 2874.01 595.683  12 
  -6   1  16 3301.87 528.389  14 
  -6   1  16 2942.75 587.152  26 
   6   1  16 3259.36 509.871  14 
   6  -1  16 3370.76 596.449   9 
  -6   1  16 2484.05 655.633  16 
   6  -1  17 661.110 245.811   9 
  -6   1  17 420.956 260.139  24 
   6   1  17 433.869 136.545  14 
  -6   1  17 179.236 244.071  17 
   6   1  17 781.220 254.637   9 
  -6  -1 -17 287.389 102.859  12 
  -6  -1  17 486.671 212.419  25 
  -6  -1  17 310.877 194.152  14 
  -6  -1  17 422.017 236.096  17 
  -6   1  17 396.552 169.547  26 
  -6   1  17 419.373 279.363  16 
   6  -1  17 417.858 213.739  15 
  -6  -1  17 619.791 300.420  24 
   6   1  17 448.451 176.224   6 
  -6  -1  17 470.864 271.663  26 
   6  -1  17 382.582 242.219  16 
  -6  -1 -17 509.202 267.457  10 
   6  -1 -17 406.029 469.092  12 
  -6  -1  17 404.940 261.552  16 
  -6   1 -17 319.042 192.468  10 
  -6   1  17 463.111 208.556  25 
   6   1  17 544.959 300.327  16 
  -6   1  17 513.921 213.039  14 
  -6  -1  17 671.695 300.240  21 
  -6   1  17 343.372 218.665  21 
  -6  -1  18 17948.3 1454.32  21 
  -6   1  18 17794.9 1350.90  26 
  -6   1  18 17199.0 1579.07  25 
   6   1  18 15220.9 1288.79  16 
  -6   1  18 14455.0 1315.79  17 
  -6  -1  18 18276.4 1579.30  25 
   6   1  18 18121.8 1251.57   9 
   6  -1  18 18263.7 1344.44   9 
  -6   1 -18 17665.1 1438.01  10 
  -6   1  18 18905.3 1235.31  14 
  -6  -1  18 18834.2 1466.83  26 
  -6  -1  18 16722.4 1322.51  17 
  -6  -1 -18 15849.1 1225.02  12 
  -6  -1 -18 16421.7 1315.02  10 
   6   1  18 19230.7 1139.30  14 
  -6   1  18 18123.7 1619.61  24 
  -6  -1  18 16188.1 1462.95  16 
   6  -1  18 18248.4 1286.69  15 
  -6  -1  18 17742.0 1566.72  24 
  -6   1  18 17404.2 1392.58  21 
  -6  -1  18 19848.8 1289.33  14 
  -6   1  18 15044.2 1451.66  16 
   6  -1  18 15770.4 1356.19  16 
  -6  -1  19 3381.44 591.113  21 
  -6  -1  19 3431.96 636.867  24 
  -6   1  19 3226.33 569.144  17 
   6  -1  19 3929.28 545.381  15 
  -6   1  19 3443.10 664.137  24 
  -6  -1  19 3239.14 558.186  17 
  -6   1  19 3598.22 502.949  14 
  -6   1  19 3399.22 576.647  21 
  -6  -1  19 3521.55 564.626  26 
   6   1  19 2625.14 504.438  16 
   6  -1  19 2875.18 573.342   9 
  -6   1  19 3699.61 698.068  25 
   6  -1  19 3811.27 679.280  21 
  -6   1 -19 3190.47 581.777  10 
  -6  -1  19 3406.86 539.248  14 
   6   1  19 4014.29 548.544   9 
  -6   1  19 3148.33 567.841  26 
  -6   1  19 3043.03 628.024  16 
  -6  -1 -19 2788.61 514.450  10 
  -6  -1  19 2676.38 569.252  16 
  -6  -1  19 3440.80 634.824  25 
   6  -1  19 3002.91 562.370  16 
   6   1  19 3775.71 482.956  14 
   6   1  19 3523.62 539.273  15 
  -6   1  20 2428.71 505.086  16 
  -6   1  20 2432.64 481.271  17 
  -6  -1  20 3007.55 483.169  14 
  -6  -1  20 3072.72 563.605  24 
   6  -1  20 3405.97 578.130  21 
  -6  -1  20 2498.05 494.667  16 
  -6  -1  20 2134.93 410.632  17 
   6  -1  20 2840.88 474.791  16 
  -6  -1  20 3161.05 542.184  21 
  -6   1  20 3057.35 571.807  24 
  -6   1 -20 3025.82 530.563  10 
  -6  -1  20 3020.16 556.098  25 
  -6  -1 -20 2354.49 457.107  10 
  -6   1  20 2689.25 449.885  14 
  -6   1  20 2601.46 463.329  26 
  -6   1  20 2903.60 548.716  25 
   6   1  20 3561.01 500.278  15 
   6  -1  20 4226.33 525.564  15 
  -6  -1  21 101.578 80.0018  24 
  -6  -1  21 137.965 116.421  16 
  -6   1  21-97.5139 118.683  24 
   6  -1  21-70.0142 100.640  21 
   6  -1  21 15.7183 58.7195  15 
   6   1  21 53.4595 123.630  21 
  -6   1  21 96.8520 81.2174  17 
  -6  -1 -21 100.664 88.3461  10 
  -6  -1  21 11.4293 76.6383  21 
  -6   1  21 202.398 121.818  16 
   6   1  21 70.8039 55.5920  15 
  -6  -1  21 21.1804 57.9833  17 
  -6   1  21 21.2203 6.50649  14 
  -6  -1  21 184.068 144.891  25 
  -6   1 -21 58.7682 99.3006  10 
  -6   1  21-25.2107 70.6183  25 
   6   1  22 463.949 134.457  15 
  -6  -1  22 343.787 145.814  25 
   6  -1  22 400.971 106.838  15 
  -6   1  22 295.250 144.035  25 
  -6  -1  22 275.328 152.547  24 
  -6   1  22 360.536 130.803  24 
  -7  -1   0-151.144 138.497   2 
  -7   1   0-298.693 490.615   2 
   7  -1   0 28.0047 97.3140   1 
  -7  -1   0 59.6874 87.7414   1 
  -7  -1   0 74.5652 50.2239   3 
  -7   1   0-65.4728 599.674   3 
  -7  -1  -1 19430.5 1753.17   1 
  -7  -1   1 15662.9 2706.27   3 
  -7  -1  -1 16025.0 2670.85   2 
  -7   1   1 14872.3 2912.19   3 
  -7   1  -1 17574.6 1940.05   1 
  -7  -1  -1 18146.3 2879.56   3 
  -7   1   1 14899.6 2834.79   2 
  -7  -1   1 16027.6 2698.34   2 
   7  -1  -1 16510.4 2439.60   1 
   7   1  -1 14982.7 1467.20   1 
   7  -1  -2 10617.3 2130.12   1 
  -7   1  -2 11603.8 1694.97   1 
  -7   1   2 10784.2 2347.67   2 
  -7  -1   2 11961.8 2411.94   3 
  -7  -1   2 12130.5 2382.62   2 
  -7  -1  -2 13369.6 1677.13   1 
  -7   1   2 11990.4 2577.56   3 
  -7  -1  -2 13829.0 2552.55   3 
  -7  -1  -2 12800.7 2403.31   2 
  -7   1  -3 145.280 193.266   1 
  -7   1   3 109.254 57.6691  20 
  -7  -1   3-217.253 478.129   3 
  -7   1   3 230.642 426.746   2 
   7  -1  -3 301.425 166.615   1 
  -7  -1  -3 198.455 189.366   1 
  -7  -1  -3 255.352 110.364  12 
  -7  -1   3 229.953 461.671   2 
  -7   1   3-68.6618 284.713   3 
  -7   1   4 18951.6 1075.79  10 
  -7   1  -4 16519.2 950.494  12 
  -7  -1  -4 18049.5 2371.47   1 
  -7  -1  -4 17950.2 1692.81  18 
  -7  -1  -4 18586.7 1076.95  12 
   7  -1  -4 10816.6 2284.69   1 
  -7   1  -4 19698.6 1203.86  27 
  -7   1  -4 19291.0 2481.27   1 
  -7   1   4 15366.2 3052.47   3 
  -7   1   4 15603.8 2970.42   2 
  -7  -1   4 17341.6 3108.35   2 
  -7   1   4 16094.4 1091.24  20 
  -7   1  -4 20671.7 1546.03  18 
  -7  -1   4 15742.5 2991.35   3 
  -7  -1  -4 23631.1 1507.03  27 
  -7   1  -4 17419.8 1018.06  10 
  -7   1   5 3930.34 1694.83   3 
  -7   1  -5 4814.55 615.848  23 
   7  -1  -5 1337.38 821.250   1 
  -7  -1  -5 5725.95 754.621  27 
  -7   1   5 4227.51 1610.22   2 
  -7  -1  -5 4499.39 875.553  18 
  -7   1   5 4527.30 680.396  26 
  -7   1   5 4494.01 571.807  20 
  -7   1  -5 5067.91 613.330  27 
  -7  -1   5 4267.08 668.868  26 
  -7  -1  -5 5619.71 691.065  23 
  -7   1  -5 4584.56 725.435  18 
  -7  -1  -5 6225.99 1467.06   1 
  -7   1  -5 6115.23 1475.48   1 
  -7  -1   5 4385.42 564.450  20 
  -7   1  -5 4510.56 544.038  10 
  -7   1   5 4670.43 565.867  10 
  -7  -1  -5 5049.50 580.201  12 
  -7   1  -5 4325.74 502.554  12 
  -7   1  -6 33382.1 1694.99  27 
  -7   1  -6 27860.8 1839.10  18 
  -7  -1   6 26320.0 1576.80  24 
  -7  -1  -6 31566.7 1767.74  23 
  -7   1  -6 26564.4 3316.40   1 
  -7   1   6 25994.7 1684.46  24 
  -7  -1   6 28035.7 1737.71  26 
  -7   1   6 26961.0 1720.98  25 
  -7  -1   6 26195.2 1569.71  25 
  -7  -1  -6 27689.6 1305.68  10 
  -7  -1  -6 29823.8 1473.42  12 
  -7  -1  -6 26590.5 2136.07  18 
  -7   1   6 23725.9 3951.28   3 
  -7   1  -6 26886.6 1534.01  23 
  -7   1   6 26517.0 1719.18  26 
  -7  -1  -6 35101.0 3903.67   1 
  -7   1  -6 28430.3 1392.27  10 
  -7   1   6 24820.3 3976.62   2 
  -7   1  -6 22385.2 1198.00  12 
  -7  -1  -6 35830.3 1810.74  27 
  -7   1   6 27603.0 1447.17  20 
  -7  -1   6 28601.1 1431.45  20 
  -7   1   7 19057.2 1524.68  25 
  -7  -1  -7 21831.6 3264.31   1 
  -7   1   7 18878.2 1518.36  24 
  -7  -1  -7 20377.4 1161.48  10 
  -7   1  -7 21657.6 1414.41  23 
  -7  -1   7 18869.8 1391.09  24 
  -7  -1   7 19051.8 1479.86  26 
  -7  -1   7 19817.8 1218.69  20 
  -7   1  -7 24637.4 3341.93   1 
  -7  -1  -7 20504.2 1508.46  23 
  -7   1   7 19593.9 1485.34  26 
  -7   1  -7 22610.4 1635.36  18 
  -7   1   7 17568.2 1007.24   8 
  -7  -1  -7 24417.6 2080.96  18 
  -7  -1   7 19808.7 1429.45  25 
  -7   1   7 21071.4 1251.94  20 
  -7   1  -7 19978.4 1227.99  10 
  -7   1   7 19705.0 1271.44  17 
  -7  -1  -7 19836.7 1264.14  12 
  -7   1  -7 22552.5 1229.71  12 
  -7  -1  -7 23112.1 1491.43  27 
  -7   1  -8 46631.6 1864.69  12 
  -7  -1   8 51382.4 2370.72  26 
  -7  -1   8 46362.3 2296.41  24 
  -7  -1  -8 47371.0 1865.96  10 
  -7   1  -8 44988.2 1920.62  10 
  -7  -1  -8 44377.6 2827.82  18 
  -7   1   8 46353.8 1646.24   8 
  -7   1   8 46126.6 2443.30  24 
  -7  -1   8 41704.5 1449.56  14 
  -7   1  -8 49002.6 2254.83  23 
  -7  -1  -8 52028.6 2309.85  27 
  -7   1   8 45901.8 2058.49  17 
  -7   1   8 44925.9 2406.86  25 
  -7  -1  -8 44076.5 5045.07   1 
  -7   1  -8 55502.1 2549.53  18 
  -7   1  -8 49422.6 5034.06   1 
  -7  -1   8 45588.2 2276.54  25 
  -7   1   8 42719.5 2212.75  26 
  -7   1   8 47195.2 1977.90  20 
  -7  -1  -8 45713.2 1998.90  12 
  -7  -1  -8 51201.7 2421.61  23 
  -7  -1   8 49140.2 1929.15  20 
  -7  -1   9 20232.6 1332.99  17 
  -7   1   9 20361.5 1651.45  25 
  -7   1  -9 20078.8 1334.21  10 
  -7   1   9 20325.3 1129.64   8 
  -7   1   9 21131.8 1598.79  26 
  -7  -1   9 18888.1 1522.94  26 
  -7  -1   9 20217.4 1583.84  24 
   7  -1   9 22916.9 1323.92   9 
  -7   1  -9 21987.6 1300.95  12 
  -7   1   9 20011.6 1644.16  24 
  -7  -1  -9 24482.2 1586.44  27 
  -7  -1  -9 20802.3 1274.23  10 
  -7  -1  -9 23579.3 1662.09  23 
  -7   1  -9 19367.2 3337.61   1 
  -7  -1   9 19922.0 1565.17  25 
  -7   1  -9 23708.0 1580.53  23 
  -7   1   9 21394.0 1351.28  20 
  -7  -1   9 18235.9 1024.26  14 
  -7  -1   9 21716.9 1315.18  20 
  -7  -1  -9 19029.1 3503.77   1 
  -7  -1  -9 21133.4 1949.66  18 
  -7   1   9 19854.8 1420.60  17 
  -7  -1  -9 21514.6 1415.61  12 
  -7  -1 -10 9644.75 1082.29  23 
  -7   1  10 7311.07 968.489  26 
  -7  -1  10 6670.20 839.754  17 
  -7  -1 -10 9414.99 880.742  10 
  -7   1  10 8475.34 857.571  20 
  -7  -1 -10 8107.46 871.944  12 
  -7  -1  10 7561.40 816.382  21 
  -7   1 -10 10023.8 1074.68  23 
  -7  -1  10 9146.91 869.824  20 
  -7   1  10 8169.88 748.432   8 
  -7   1 -10 8435.96 882.748  10 
  -7  -1 -10 7606.42 1160.75  18 
  -7   1  10 8365.55 1109.52  24 
  -7   1 -10 8062.77 2297.77   1 
  -7  -1  10 8161.65 684.184  14 
   7  -1  10 9649.35 873.707   9 
  -7   1  10 8252.31 1104.13  25 
  -7   1  10 8352.76 662.391  14 
  -7   1  10 7289.24 931.291  17 
  -7   1 -10 8922.62 836.594  12 
  -7  -1 -10 7968.41 2412.91   1 
  -7  -1  10 8058.08 1021.72  25 
  -7  -1 -10 10471.8 1039.41  27 
  -7  -1  10 7706.00 1002.92  26 
  -7  -1  10 8319.77 1049.53  24 
  -7  -1  11 20286.8 1127.91  14 
  -7   1 -11 23677.1 1699.86  23 
   7   1  11 22427.6 1116.43   6 
  -7   1 -11 21146.7 1343.34  12 
  -7  -1  11 18014.4 1315.85  21 
  -7   1  11 20301.8 1207.05   8 
  -7   1  11 19419.9 1081.16  14 
   7  -1  11 22212.3 1391.58   9 
  -7  -1  11 19891.4 1684.78  25 
  -7  -1  11 19077.3 1397.18  17 
  -7  -1  11 21900.8 1401.09  20 
  -7  -1 -11 23874.6 1761.13  23 
  -7  -1  11 19263.7 1600.16  26 
  -7  -1 -11 20581.8 1367.89  10 
  -7   1  11 20137.5 1399.51  20 
  -7   1 -11 21267.5 1474.08  10 
  -7  -1 -11 19289.5 1409.27  12 
  -7  -1  11 19776.1 1675.04  24 
  -7   1  11 19158.8 1516.89  17 
  -7   1  11 19981.8 1757.26  24 
  -7   1  11 19980.1 1764.63  25 
  -7   1  11 20367.7 1596.16  26 
  -7  -1  12 1844.10 524.601  24 
  -7   1  12 1391.43 441.093  24 
  -7  -1 -12 1965.81 416.708  10 
  -7   1  12 1464.68 437.064  17 
  -7  -1  12 1362.77 352.975  17 
  -7  -1  12 1566.08 401.725  21 
  -7   1  12 1586.78 355.961   8 
  -7  -1  12 1343.66 384.075  26 
  -7   1 -12 1978.71 466.479  10 
  -7  -1  12 1434.55 442.994  16 
  -7  -1  12 1613.26 349.640  14 
  -7   1  12 1503.83 322.788  14 
  -7  -1  12 1718.62 531.131  25 
   7  -1  12 1833.07 396.196   9 
  -7   1  12 1322.93 474.607  26 
  -7   1  12 1354.54 435.178  16 
  -7  -1 -12 1941.81 459.433  12 
   7   1  12 2136.17 376.216   6 
  -7   1 -12 1885.98 418.547  12 
  -7  -1 -12 2499.44 588.042  23 
  -7   1  12 1868.53 508.165  25 
  -7   1  12 1943.10 428.709  20 
  -7   1 -12 2294.63 513.258  23 
  -7  -1  13 1367.56 388.224  17 
  -7  -1  13 1439.13 438.628  16 
  -7   1 -13 1723.26 402.059  12 
  -7   1  13 1108.93 424.554  16 
  -7   1  13 1554.77 497.324  17 
  -7  -1  13 1854.82 588.258  25 
  -7   1  13 1539.44 485.974  24 
   7   1  13 1956.01 419.149   9 
  -7   1  13 1646.68 459.356  26 
  -7  -1  13 1065.77 316.897  14 
  -7  -1  13 1740.05 532.891  24 
  -7   1  13 1782.58 572.031  25 
  -7  -1 -13 1860.51 450.661  12 
   7  -1  13 1494.02 410.079  16 
  -7   1  13 1767.37 357.946  14 
  -7  -1  13 1622.68 423.341  21 
  -7   1 -13 1846.95 411.024  10 
  -7   1  13 1624.88 353.614   8 
  -7  -1 -13 2076.25 460.050  10 
  -7  -1  13 1437.71 486.262  26 
   7  -1  13 1787.46 407.628   9 
  -7  -1 -13 1833.80 494.113  23 
   7   1  13 2225.19 369.815   6 
  -7   1  14 828.701 370.465  16 
  -7  -1 -14 1349.57 387.631  12 
  -7  -1  14 951.680 330.423  17 
  -7  -1 -14 1442.01 403.163  23 
  -7   1  14 1338.41 499.398  25 
  -7   1  14 1041.74 363.479  17 
  -7   1 -14 1320.71 352.548  12 
  -7   1  14 1040.29 292.084  14 
  -7  -1  14 936.232 292.322  14 
  -7   1  14 1196.35 510.312  24 
  -7   1  14 1011.46 325.699  26 
   7   1  14 1391.01 359.773   9 
  -7  -1  14 932.908 312.387  21 
  -7  -1  14 722.827 321.652  16 
  -7   1 -14 1414.34 384.203  10 
  -7  -1 -14 1225.20 372.729  10 
   7   1  14 1319.36 284.567   6 
   7  -1  14 1107.87 355.443  16 
   7  -1  14 1290.64 346.854   9 
  -7  -1  14 1260.81 422.364  26 
  -7  -1  14 1309.79 483.653  25 
  -7  -1  14 1167.53 430.786  24 
  -7   1  15 1994.26 539.442  26 
   7  -1  15 1956.70 470.239  16 
  -7   1  15 1597.23 492.539  16 
   7  -1  15 2445.14 448.212  15 
  -7  -1  15 2170.65 516.991  26 
   7  -1  15 2322.17 466.476   9 
  -7   1  15 2080.16 579.479  24 
  -7  -1 -15 1997.20 514.527  12 
  -7   1  15 1726.69 397.217  14 
  -7  -1  15 2167.63 596.650  24 
  -7   1 -15 1981.88 465.418  10 
  -7   1  15 1650.27 408.182  17 
  -7  -1 -15 2950.08 644.505  23 
  -7  -1  15 1591.01 456.583  16 
  -7  -1  15 2115.51 594.264  25 
  -7   1  15 2134.05 610.282  25 
   7   1  15 2423.02 469.320   9 
   7   1  15 2199.52 387.191   6 
  -7  -1  15 1841.62 425.230  14 
  -7  -1  15 2126.25 491.559  21 
  -7  -1  15 1990.22 489.239  17 
  -7  -1 -15 2059.47 462.167  10 
   7  -1 -16 3235.23 1080.58  12 
  -7   1  16 6258.18 985.992  16 
  -7  -1  16 6934.37 876.893  17 
  -7   1  16 8125.10 1164.41  25 
  -7  -1 -16 9199.65 1099.39  23 
  -7  -1  16 6316.06 921.691  16 
  -7   1  16 6958.27 929.443  17 
  -7  -1  16 7807.88 1093.23  24 
   7   1  16 8385.62 914.913   9 
  -7  -1  16 7748.51 882.454  14 
  -7   1  16 8111.19 1155.56  24 
  -7  -1  16 7224.87 953.235  26 
  -7  -1  16 7369.15 924.871  21 
  -7  -1  16 7656.57 1103.89  25 
   7  -1  16 6291.50 857.986  16 
  -7  -1 -16 7284.72 900.221  12 
  -7   1  16 7841.62 985.749  26 
  -7  -1 -16 6811.54 871.491  10 
  -7   1  16 7880.21 796.618  14 
  -7   1 -16 8082.15 949.338  10 
   7  -1  16 7765.35 909.555   9 
   7  -1  16 8559.99 889.068  15 
  -7   1  17 1112.07 364.131  26 
   7   1  17 1051.30 297.617   9 
  -7  -1  17 823.954 356.137  26 
   7  -1  17 1061.54 319.560  16 
  -7  -1  17 880.985 307.342  17 
  -7  -1 -17 809.143 284.572  12 
  -7  -1  17 925.143 353.577  25 
  -7  -1 -17 990.782 388.541  10 
  -7   1 -17 891.147 295.112  10 
  -7  -1  17 958.685 295.216  21 
  -7   1  17 840.099 379.779  25 
  -7  -1  17 546.320 274.412  16 
   7  -1 -17 257.660 314.407  12 
  -7   1  17 1090.50 341.693  17 
  -7  -1  17 909.219 347.267  24 
  -7  -1  17 617.712 226.426  14 
  -7   1  17 997.654 285.257  14 
   7  -1  17 1119.95 299.907  15 
  -7   1  17 546.532 297.196  16 
   7  -1  17 943.294 347.514   9 
  -7   1  17 940.829 390.050  24 
  -7   1  18 1012.75 427.265  25 
  -7  -1  18 886.927 320.159  26 
  -7  -1 -18 728.473 243.140  12 
   7  -1  18 905.776 257.538  15 
  -7   1  18 795.199 305.264  16 
  -7  -1  18 985.098 375.623  24 
  -7   1  18 846.932 299.924  17 
  -7   1  18 878.175 319.424  24 
  -7   1  18 794.392 279.738  26 
   7  -1  18 958.229 332.442  21 
  -7   1 -18 579.165 212.810  10 
  -7   1  18 757.331 221.747  14 
  -7  -1 -18 891.159 293.374  10 
  -7  -1  18 850.000 277.786  21 
  -7  -1  18 737.366 276.793  17 
  -7  -1  18 676.661 248.648  16 
  -7  -1  18 852.186 345.887  25 
   7  -1  18 784.830 246.730   9 
   7   1  18 802.927 245.593   9 
   7   1  18 985.105 300.684  15 
  -7  -1  18 611.458 218.237  14 
   7  -1  19 183.490 151.580  21 
  -7  -1  19 494.883 262.232  26 
  -7  -1  19 374.624 198.928  21 
  -7  -1  19 10.4694 82.4985  17 
  -7  -1 -19 80.0345 9.34851  10 
   7  -1  19 222.288 149.563   9 
  -7  -1  19 140.810 203.595  25 
  -7   1  19 120.284 94.2089  16 
   7   1  19 286.535 163.656   9 
  -7   1  19 134.681 80.1148  14 
   7  -1  19 249.370 163.246  15 
  -7  -1  19 395.688 377.865  24 
  -7   1  19 124.958 191.004  25 
  -7  -1  19 172.782 119.284  14 
  -7   1  19 224.321 132.739  24 
  -7   1  19 487.227 194.313  26 
   7   1  19 52.7564 16.1879  15 
  -7   1 -19 236.826 118.755  10 
  -7   1  19 79.8544 162.365  17 
  -7   1  20 1825.00 417.188  25 
   7   1  20 1745.97 323.598   9 
   7  -1  20 1559.91 340.918   9 
  -7   1  20 1020.87 247.918  14 
  -7  -1  20 1336.37 358.413  25 
  -7   1  20 1282.40 324.869  26 
  -7   1 -20 1727.87 365.823  10 
  -7  -1  20 1600.50 390.527  24 
   7  -1  20 2009.58 364.819  15 
  -7  -1 -20 1278.14 292.234  10 
  -7   1  20 763.385 206.138  17 
  -7  -1  20 531.426 171.501  17 
  -7   1  20 1680.00 406.451  24 
   7   1  20 1982.13 343.775  15 
  -7   1  20 846.909 258.375  16 
  -7   1  21 5111.95 616.966  25 
  -7   1 -21 5080.76 545.407  10 
   7   1  21 6187.64 562.479  15 
  -7   1  21 5564.58 647.395  24 
  -7  -1  21 5264.69 623.229  25 
  -7  -1  21 5207.29 637.752  24 
   7  -1  21 6770.04 576.185  15 
  -8  -1   0 56578.0 2916.29  18 
  -8   1   0 47552.9 5565.98   2 
   8  -1   0 56452.5 4950.11   1 
  -8   1   0 61723.4 2169.15  10 
  -8  -1   0 50498.6 5388.51   3 
  -8  -1   0 51799.6 1775.67  12 
  -8  -1   0 49474.2 5186.67   2 
  -8   1   0 56393.7 2551.39  18 
  -8   1   0 54906.5 6092.21   3 
  -8  -1  -1 20730.6 1844.60   1 
  -8  -1   1 17069.7 3072.67   3 
   8  -1  -1 19940.9 2870.90   1 
  -8  -1  -1 19391.9 3260.47   2 
  -8  -1  -1 19270.6 3307.00   3 
  -8  -1   1 18468.9 3163.55   2 
  -8  -1   1 21131.9 1721.26  18 
  -8   1  -1 22197.3 1189.49  10 
  -8   1  -1 21172.7 1577.04  18 
  -8   1   1 18102.3 3423.39   3 
  -8  -1  -1 20710.2 1489.10  27 
  -8   1  -1 18907.3 1086.23  12 
  -8   1   1 19081.8 3442.92   2 
  -8  -1  -1 21857.2 1821.58  18 
  -8   1   1 20904.2 1509.40  18 
  -8  -1  -1 20112.1 1114.92  12 
  -8   1  -1 18804.2 3568.57   3 
  -8   1  -1 18712.3 3517.42   2 
  -8   1   1 21654.7 1208.51  10 
  -8  -1   1 18527.1 1064.90  12 
  -8  -1  -2 1553.22 328.990  12 
  -8  -1  -2 2266.48 691.997   1 
  -8  -1  -2 1273.58 757.010   2 
  -8  -1  -2 1675.77 576.255  18 
  -8  -1   2 1677.43 360.388  10 
  -8   1  -2 1573.70 331.451  12 
  -8  -1  -2 2193.25 465.874  27 
  -8   1   2 1687.53 357.370  10 
  -8  -1   2 1566.15 838.539   3 
  -8   1   2 1111.52 849.348   2 
  -8   1  -2 2007.43 356.572  10 
   8  -1  -2 1496.34 774.677   1 
  -8   1   2 1614.75 1111.42   3 
  -8  -1   2 1878.44 1137.07   2 
  -8   1   2 1987.09 439.756  18 
  -8   1  -2 2059.75 508.084  18 
  -8   1  -2 2143.82 411.081  27 
  -8  -1  -2 1322.18 848.779   3 
  -8  -1   2 1818.63 485.521  18 
  -8   1  -2 2251.64 756.249   1 
  -8   1   3 1311.11 319.502  10 
  -8   1  -3 1644.86 454.847  18 
  -8  -1  -3 1853.55 656.145   1 
  -8  -1   3 1135.23 932.441   3 
  -8  -1  -3 1832.34 553.452  18 
  -8   1  -3 1691.10 332.417  10 
  -8   1  -3 1787.38 371.953  23 
  -8  -1  -3 1971.09 1024.09   3 
  -8  -1  -3 2059.09 1067.01   2 
  -8  -1  -3 1480.88 365.896  27 
  -8  -1  -3 1651.59 405.683  23 
  -8  -1   3 1492.13 439.016  26 
  -8  -1   3 1694.71 442.086  18 
  -8   1   3 850.997 672.906   2 
  -8   1  -3 1929.17 390.284  27 
  -8   1  -3 1300.42 289.837  12 
  -8  -1   3 1243.19 849.024   2 
  -8  -1  -3 1660.57 315.817  12 
  -8  -1  -3 1678.05 321.880  10 
  -8   1   3 1408.13 358.890  18 
  -8  -1   3 1571.29 328.263  10 
  -8   1   3 1429.60 1029.62   3 
  -8   1   3 1254.12 334.645  20 
  -8   1  -3 1897.49 732.475   1 
  -8   1   4 4310.27 569.824  10 
  -8  -1  -4 4536.12 649.871  27 
  -8   1  -4 4621.93 559.065  10 
  -8   1  -4 4961.10 637.906  23 
  -8  -1   4 5039.11 587.160  10 
  -8   1   4 3596.73 553.427  20 
  -8  -1  -4 5328.29 682.212  23 
  -8   1   4 4753.67 1785.25   2 
  -8   1  -4 5858.88 677.358  27 
  -8  -1  -4 4730.24 1255.73   1 
  -8   1   4 4432.36 1675.14   3 
  -8  -1   4 3137.62 1436.65   2 
  -8  -1  -4 5009.70 930.554  18 
  -8  -1  -4 5240.57 540.515  10 
  -8  -1   4 3574.22 1582.13   3 
  -8   1  -4 4588.28 1235.44   1 
  -8   1  -4 4863.21 560.998  12 
  -8   1   4 4239.20 659.704  18 
  -8  -1   4 3770.31 557.097  20 
  -8  -1   4 4092.44 703.932  26 
  -8   1   4 3767.42 671.290  26 
  -8  -1  -4 4564.45 562.256  12 
  -8  -1   4 4827.65 738.142  18 
  -8   1  -4 4822.60 777.841  18 
  -8  -1  -5 1593.37 387.273  27 
  -8   1   5 1495.72 332.943  10 
  -8  -1  -5 1948.79 416.302  23 
  -8   1  -5 1874.54 356.376  10 
  -8   1   5 1271.44 329.429  17 
  -8   1  -5 1791.45 352.622  23 
  -8  -1   5 1352.97 343.469  24 
  -8  -1  -5 1917.04 835.991   1 
  -8   1   5 1736.53 427.261  18 
  -8  -1  -5 1844.65 333.679  10 
  -8  -1   5 1523.36 358.139  25 
  -8  -1  -5 1675.08 346.112  12 
  -8   1  -5 1882.13 386.901  27 
  -8  -1   5 1580.65 405.787  26 
  -8   1   5 1198.20 1046.49   3 
  -8   1   5 1590.58 1262.72   2 
  -8   1   5 1530.22 386.009  26 
  -8   1   5 1632.63 452.980  25 
  -8   1  -5 1840.64 832.624   1 
  -8  -1   5 1503.49 337.045  20 
  -8   1  -5 1441.51 324.742  12 
  -8   1   5 1390.79 325.182  20 
  -8  -1   5 1351.37 366.347  18 
  -8   1   5 1704.47 445.490  24 
  -8  -1  -5 1623.56 559.059  18 
  -8   1  -5 1476.10 453.398  18 
  -8   1  -6 24572.3 1543.70  27 
  -8  -1   6 19410.3 1291.35  20 
  -8  -1   6 18805.2 1371.13  25 
  -8  -1  -6 25304.1 2161.11  18 
  -8   1  -6 20630.0 3018.43   1 
  -8   1   6 19772.2 1552.91  26 
  -8   1   6 19925.7 1286.71  17 
  -8   1   6 15489.2 3433.56   2 
  -8  -1  -6 20725.9 1162.20  10 
  -8  -1   6 18249.0 1386.80  24 
  -8  -1  -6 22779.7 1550.47  23 
  -8   1  -6 18918.7 1370.11  23 
  -8  -1   6 19432.4 1524.83  26 
  -8  -1  -6 21497.1 1292.67  12 
  -8  -1  -6 21464.1 3114.96   1 
  -8   1  -6 21321.7 1261.85  10 
  -8   1   6 16079.5 3578.81   3 
  -8   1   6 18531.6 1272.17  20 
  -8   1   6 20274.6 1380.52  18 
  -8   1   6 19808.1 1500.92  24 
  -8  -1  -6 21110.5 1504.42  27 
  -8   1  -6 18533.7 1546.71  18 
  -8   1  -6 20567.4 1204.08  12 
  -8   1   6 20196.1 1514.31  25 
  -8  -1   6 19930.2 1397.32  18 
  -8  -1   7 24433.8 1453.96  20 
  -8   1  -7 24287.1 1380.63  10 
  -8   1   7 24276.4 1736.81  24 
  -8   1   7 23277.4 1687.72  25 
  -8   1  -7 28510.1 1710.87  23 
  -8   1   7 24000.9 1739.65  26 
  -8   1  -7 25550.0 1381.12  12 
  -8  -1  -7 23884.5 2120.51  18 
  -8  -1   7 22979.7 1574.85  24 
  -8  -1  -7 26694.5 1664.49  27 
  -8  -1  -7 27048.7 1732.50  23 
  -8   1  -7 22182.4 3350.75   1 
  -8  -1  -7 29177.9 3868.44   1 
  -8  -1  -7 26009.4 1346.73  10 
  -8  -1   7 24948.5 1709.54  26 
  -8   1   7 23514.6 1209.47   8 
  -8   1   7 23729.7 1473.73  17 
  -8  -1   7 23669.3 1601.83  25 
  -8   1   7 24799.1 1479.07  20 
  -8  -1  -7 27424.5 1516.79  12 
  -8   1  -7 26776.2 1881.42  18 
  -8   1  -8 28058.6 3894.30   1 
  -8   1   8 28510.9 1672.35  17 
  -8  -1   8 28741.0 1874.17  25 
  -8  -1  -8 28979.4 1618.26  12 
  -8   1  -8 29390.7 1516.09  12 
  -8   1   8 29710.5 1994.34  25 
  -8  -1  -8 31567.0 1891.49  27 
  -8  -1   8 27664.5 1834.37  24 
  -8   1  -8 33265.9 1958.07  23 
  -8   1   8 29466.4 1979.94  24 
  -8   1  -8 29473.6 1589.33  10 
  -8  -1   8 30416.7 1648.09  20 
  -8   1   8 29414.4 1990.65  26 
  -8  -1   8 27569.6 1918.53  26 
  -8  -1  -8 30100.5 1509.62  10 
  -8  -1  -8 29030.6 4071.70   1 
  -8  -1  -8 28261.9 2301.61  18 
  -8   1   8 29170.7 1613.58  20 
  -8  -1  -8 29646.0 1944.84  23 
  -8   1   8 27239.6 1336.72   8 
  -8   1  -8 33382.6 2079.08  18 
  -8   1  -9-13.9131 54.3517  12 
  -8  -1  -9-98.4090 77.2013  27 
  -8   1   9-15.7405 14.0295  17 
  -8   1   9-131.571 108.068  25 
  -8  -1   9 64.4865 151.686  25 
  -8  -1  -9-215.539 574.619   1 
  -8   1   9-3.87978 116.205  20 
  -8  -1   9 152.871 171.960  20 
  -8   1   9 139.596 141.165   8 
  -8  -1   9 12.1872 35.6181  26 
  -8   1  -9 25.7964 113.782  10 
  -8   1  -9-97.5520 136.951  23 
  -8  -1  -9 34.0725 98.4464  12 
  -8   1  -9-292.290 522.454   1 
  -8  -1  -9-30.5614 58.8130  10 
  -8  -1  -9 99.2677 123.744  18 
  -8   1   9 43.3808 206.820  26 
  -8  -1  -9 87.4881 182.587  23 
  -8   1   9 37.8369 144.209  24 
  -8   1  -9-15.2924 35.4266  18 
  -8  -1   9 84.4569 157.655  24 
   8  -1   9 53.3919 129.937   9 
  -8  -1  10 2344.63 456.057  20 
  -8  -1  10 1863.87 511.674  25 
  -8  -1 -10 3078.79 583.202  27 
   8  -1  10 2327.86 446.315   9 
  -8   1  10 1951.01 463.624  20 
  -8  -1  10 2319.87 580.453  24 
  -8   1  10 2277.17 581.663  25 
  -8   1 -10 2528.76 537.384  23 
  -8   1  10 1990.97 471.576  26 
  -8  -1  10 1621.59 334.926  14 
  -8   1  10 1755.25 444.715  17 
  -8  -1  10 2019.65 541.986  26 
  -8   1 -10 2278.65 440.213  12 
  -8   1 -10 2325.45 448.869  10 
  -8  -1 -10 2783.57 594.320  23 
  -8  -1 -10 2187.48 458.594  12 
  -8   1  10 1914.01 359.911   8 
  -8  -1 -10 2381.75 435.782  10 
  -8   1  10 1960.75 553.050  24 
  -8  -1 -10 2494.33 646.595  18 
  -8   1  11 12070.0 1206.93  17 
  -8  -1  11 10749.2 1048.07  17 
  -8   1 -11 13321.3 1078.26  12 
  -8  -1 -11 15317.4 1423.18  23 
  -8   1 -11 14118.5 1334.75  23 
  -8  -1  11 10200.6 882.878  14 
  -8  -1  11 12598.0 1316.22  26 
   8  -1  11 12928.5 1099.93   9 
  -8   1  11 11401.7 1302.86  26 
  -8   1  11 11561.1 1374.04  25 
  -8  -1 -11 13254.9 1112.06  10 
  -8  -1  11 12032.3 1311.59  24 
  -8   1 -11 12343.3 1114.60  10 
  -8   1  11 13388.7 1158.68  20 
  -8  -1  11 13252.1 1138.03  20 
  -8  -1 -11 12465.4 1124.96  12 
  -8   1  11 11048.2 932.531   8 
  -8   1  11 12641.5 1421.90  24 
  -8  -1  11 11914.4 1312.08  25 
  -8   1 -12 3544.47 554.302  12 
  -8   1 -12 3130.51 555.134  10 
  -8   1  12 2971.50 650.615  26 
  -8   1  12 2502.86 571.272  17 
  -8   1  12 2900.12 694.783  25 
  -8   1  12 2828.19 664.648  24 
  -8  -1 -12 3401.89 677.684  23 
  -8  -1  12 2342.53 526.426  17 
  -8  -1  12 2674.48 643.365  24 
  -8  -1  12 2943.45 539.049  20 
  -8  -1  12 3102.69 648.724  26 
  -8   1  12 2839.35 553.784  20 
  -8  -1  12 2238.59 424.920  14 
  -8  -1  12 2786.49 664.210  25 
  -8  -1 -12 3272.66 558.315  10 
  -8   1  12 2260.18 448.280   8 
   8  -1  12 3201.32 531.494   9 
  -8  -1 -12 3198.37 569.983  12 
  -8   1 -12 4408.44 752.845  23 
  -8   1  13 2389.84 686.366  25 
  -8  -1  13 2456.16 653.087  24 
  -8  -1  13 2224.39 445.460  14 
  -8  -1  13 2364.26 521.977  17 
  -8   1  13 2972.30 733.131  24 
  -8   1  13 2588.43 443.070   8 
  -8  -1 -13 3076.21 553.685  10 
   8  -1  13 3193.45 536.328   9 
  -8   1 -13 2813.11 550.377  10 
  -8  -1  13 2877.05 688.689  25 
  -8   1  13 2828.83 643.777  26 
   8   1  13 3307.31 563.912   9 
  -8   1 -13 3095.56 503.569  12 
  -8   1  13 2176.53 576.375  17 
  -8  -1 -13 3510.84 686.366  23 
  -8  -1 -13 3050.91 564.514  12 
  -8  -1  13 2383.10 583.138  26 
  -8  -1  14 1511.29 387.519  14 
  -8  -1 -14 2347.59 568.692  23 
  -8  -1 -14 2069.67 472.102  10 
  -8   1  14 1246.37 379.398  17 
  -8  -1  14 1926.69 513.936  24 
  -8   1  14 1940.25 552.040  25 
  -8  -1  14 1541.00 386.463  17 
  -8   1  14 1676.63 514.654  26 
  -8   1  14 1848.11 366.602  14 
   8  -1  14 2311.75 480.385   9 
  -8  -1  14 1731.03 510.472  25 
  -8   1 -14 2143.80 445.144  12 
  -8   1  14 2186.15 640.901  24 
  -8  -1  14 1809.95 458.128  26 
  -8   1 -14 1862.27 451.858  10 
   8  -1  14 2508.31 460.055  15 
  -8  -1 -14 2140.33 486.319  12 
   8   1  14 2328.24 474.003   9 
  -8   1  15 372.893 334.316  25 
   8  -1  15 11.9443 43.0544   9 
  -8  -1  15 26.6594 90.7513  14 
  -8  -1  15 160.305 158.350  26 
  -8   1  15-7.73658 156.570  24 
   8  -1  15 12.5359 55.7692  15 
  -8  -1 -15 201.657 230.243  23 
  -8   1  15 361.571 251.451  16 
   8   1  15 16.1720 108.787   9 
  -8  -1 -15 169.852 141.949  12 
  -8   1  15 116.592 111.440  26 
  -8  -1  15 315.916 322.936  24 
  -8  -1  15 125.826 127.312  25 
  -8   1  15 122.581 112.313  14 
  -8   1  15-5.98003 107.542  17 
  -8  -1 -15 127.976 125.656  10 
  -8   1 -15 92.9825 107.149  10 
  -8  -1  15 22.2052 150.009  17 
  -8   1  16 18861.1 1710.42  24 
  -8  -1  16 15855.4 1150.88  14 
  -8  -1  16 13995.6 1174.63  17 
  -8  -1 -16 17345.9 1342.98  12 
  -8   1  16 15856.6 1344.20  17 
  -8  -1  16 18165.3 1493.31  26 
  -8   1  16 17816.9 1663.33  25 
  -8  -1  16 18213.5 1646.93  24 
   8  -1  16 19722.4 1332.95  15 
   8   1  16 19205.7 1342.46   9 
  -8  -1  16 19333.2 1723.73  25 
  -8   1 -16 18362.4 1408.39  10 
  -8   1  16 15905.5 1101.70  14 
  -8  -1 -16 17608.6 1299.63  10 
   8  -1  16 18028.0 1381.86   9 
  -8   1  16 17985.8 1464.28  26 
  -8   1  17 8365.80 965.497  17 
  -8  -1  17 10852.2 1241.03  24 
  -8  -1 -17 10997.8 1007.47  12 
  -8  -1  17 9464.77 847.822  14 
  -8  -1 -17 10214.5 956.218  10 
  -8   1  17 10965.0 1276.71  24 
   8   1  17 11524.2 999.734   9 
  -8  -1  17 7636.64 818.894  17 
   8  -1  17 11676.1 986.216  15 
  -8  -1  17 11767.0 1119.61  26 
  -8   1 -17 11177.7 1046.80  10 
  -8   1  17 10411.6 1099.26  26 
  -8  -1  17 11447.1 1262.24  25 
  -8   1  17 9287.91 801.507  14 
   8  -1  17 11511.8 1055.14   9 
   8  -1 -17 4986.58 1093.57  12 
  -8   1  17 10450.5 1237.16  25 
   8  -1  18 12515.6 982.651  15 
  -8   1  18 8208.80 885.762  17 
   8   1  18 12213.6 989.276   9 
  -8  -1  18 10905.0 1144.14  25 
  -8  -1  18 10721.1 1046.16  26 
  -8   1  18 11327.0 1219.60  24 
   8   1  18 11598.3 971.975  15 
   8  -1  18 11777.6 1025.71   9 
  -8   1  18 11732.0 1231.56  25 
  -8  -1  18 10731.2 1145.38  24 
  -8  -1 -18 9839.02 911.993  10 
  -8   1 -18 11442.1 1009.44  10 
  -8  -1 -18 10054.4 875.439  12 
  -8   1  18 10676.8 1018.21  26 
  -8   1  19 7825.76 804.385  26 
  -8  -1  19 9118.71 973.411  24 
   8  -1  19 9711.13 806.067  15 
  -8   1 -19 8366.94 815.630  10 
  -8   1  19 8866.77 987.682  24 
  -8  -1  19 8809.41 961.183  25 
  -8  -1 -19 6795.86 670.133  10 
  -8   1  19 4809.69 616.865  17 
   8   1  19 9392.94 793.670  15 
   8  -1  19 8488.77 866.219   9 
  -8  -1  19 8525.98 829.444  26 
   8   1  19 9457.79 797.364   9 
  -8   1  19 8843.31 995.859  25 
   8  -1  20 8518.44 754.771   9 
   8   1  20 9428.11 726.524  15 
  -8   1  20 8327.44 845.272  24 
  -8   1  20 8014.82 839.778  25 
   8  -1  20 9847.00 744.608  15 
  -8   1  20 7582.54 751.291  26 
  -8   1 -20 7486.13 679.459  10 
  -8  -1  20 8454.41 855.389  25 
  -8  -1  20 8357.43 862.708  24 
   8   1  20 9126.41 683.285   9 
   8   1  21-39.9673 21.0089  15 
   8  -1  21 28.5230 10.1845  15 
  -8   1  21-67.0786 86.6078  25 
  -8  -1  21-72.1504 97.0345  24 
  -8   1  21 10.3009 52.9915  24 
  -8  -1  21 39.5571 69.0975  25 
  -9  -1   0 48.3920 21.9841  10 
  -9   1   0 2.31368 39.6667  10 
  -9   1   0 2.44469 144.797  18 
  -9  -1   0 29.3844 172.634  18 
  -9  -1   0 152.917 188.381  27 
  -9  -1   0 318.366 253.926   2 
  -9   1   0 67.6797 109.678   3 
  -9   1   0-72.1643 91.0650  27 
  -9   1   0 5.89180 384.461   2 
  -9  -1   0 7.76322 115.230  12 
  -9  -1   0 33.8568 137.720   3 
  -9  -1  -1 18366.3 1148.18  12 
  -9  -1   1 21547.9 1816.68  18 
  -9  -1  -1 20513.7 1547.69  27 
  -9   1   1 16746.5 3690.63   3 
  -9   1  -1 20605.6 1324.25  27 
  -9   1  -1 18958.8 1588.62  18 
  -9   1   1 18752.0 1528.87  18 
  -9  -1  -1 16970.9 3399.06   3 
  -9   1  -1 18017.2 3709.47   2 
  -9  -1   1 17698.9 1416.72  27 
  -9  -1  -1 21524.2 1883.53  18 
  -9  -1   1 16930.3 3399.48   3 
  -9   1   1 22020.2 1275.82  10 
  -9  -1   1 17081.6 3314.68   2 
  -9   1  -1 16296.8 3582.37   3 
  -9  -1   1 22940.0 1243.92  10 
   9  -1   1 21217.7 3404.80   1 
  -9  -1  -1 22873.2 1259.38  10 
  -9   1  -1 24447.8 1421.16  10 
  -9   1   1 16861.2 3686.25   2 
  -9  -1  -1 19439.2 3551.08   2 
  -9   1  -2 55553.6 6583.88   2 
  -9  -1   2 44769.3 5665.90   3 
  -9  -1  -2 55116.1 2042.04  12 
  -9  -1  -2 56978.5 6209.98   3 
  -9   1  -2 64864.5 2206.14  10 
  -9   1  -2 57103.6 2034.64  12 
  -9  -1   2 51473.3 2308.70  27 
  -9  -1   2 64271.7 2124.01  10 
  -9   1   2 61964.9 2163.11  10 
  -9   1   2 49235.9 6107.79   2 
  -9  -1   2 48627.6 5797.56   2 
  -9  -1   2 52333.1 2532.19  26 
  -9  -1   2 60274.2 2944.21  18 
  -9  -1  -2 59857.5 2279.14  23 
  -9  -1  -2 72581.8 2363.00  10 
  -9  -1  -2 65136.3 2707.26  27 
  -9  -1  -2 55289.1 3090.93  18 
  -9  -1  -2 49966.8 5674.89   2 
  -9   1   2 48640.5 6224.63   3 
  -9   1  -2 52385.5 6487.00   3 
  -9   1  -2 58288.2 2857.10  18 
  -9   1   2 58163.1 2621.79  18 
  -9   1  -2 63856.5 2379.82  27 
  -9   1  -3 48748.9 4120.36   1 
  -9   1  -3 53841.7 2219.19  23 
  -9  -1   3 50230.5 2607.89  18 
  -9  -1  -3 50672.8 3746.16   1 
  -9  -1   3 55461.8 2022.73  10 
  -9   1   3 38444.6 1957.81  20 
  -9   1   3 42569.7 5712.48   2 
  -9  -1   3 43200.6 5583.12   2 
  -9  -1   3 39192.8 5426.75   3 
  -9   1  -3 55962.7 2267.37  27 
  -9  -1  -3 49315.6 1908.64  12 
  -9  -1  -3 49275.0 2928.37  18 
  -9   1  -3 53659.6 2003.75  10 
  -9   1   3 52308.1 2502.87  18 
  -9   1   3 42318.9 5829.66   3 
  -9  -1  -3 57824.8 2042.07  10 
  -9   1  -3 47668.8 1885.60  12 
  -9  -1  -3 41996.9 5445.20   3 
  -9   1   3 54371.8 2018.00  10 
  -9  -1  -3 52996.0 2225.81  23 
  -9  -1   3 47932.3 2432.22  26 
  -9  -1  -3 51286.7 5877.80   2 
  -9   1  -3 49514.9 2654.72  18 
  -9  -1  -3 54436.4 2465.00  27 
  -9  -1   4 6002.94 885.435  26 
  -9  -1  -4 5605.94 1995.23   2 
  -9   1   4 4831.37 2013.15   3 
  -9  -1  -4 6702.16 1474.39   1 
  -9  -1   4 4607.48 1925.95   2 
  -9  -1   4 4533.39 1957.96   3 
  -9   1   4 5316.13 732.921  20 
  -9   1  -4 6411.58 683.070  12 
  -9   1   4 6826.65 729.044  10 
  -9   1  -4 6731.69 702.731  10 
  -9  -1  -4 6932.74 805.062  23 
  -9  -1  -4 6467.93 702.130  12 
  -9   1   4 6256.27 841.285  18 
  -9  -1  -4 5950.91 2062.64   3 
  -9  -1  -4 6146.00 1055.42  18 
  -9  -1  -4 7340.20 887.929  27 
  -9  -1   4 5410.37 718.302  20 
  -9   1   4 5451.41 737.111  24 
  -9   1  -4 6472.44 981.531  18 
  -9   1   4 4714.77 822.171  26 
  -9   1  -4 7539.82 781.981  23 
  -9  -1   4 6709.86 911.218  18 
  -9  -1  -4 6905.80 687.921  10 
  -9   1   4 5532.83 743.674  25 
  -9   1  -4 7129.30 816.690  27 
  -9  -1   4 6745.28 732.113  10 
  -9   1  -4 7158.19 1634.72   1 
  -9   1   4 4536.72 1945.30   2 
  -9  -1   5 28610.3 1838.02  18 
  -9   1   5 24991.0 1564.16  20 
  -9  -1   5 24751.8 1501.49  25 
  -9   1  -5 29969.0 1723.78  23 
  -9  -1   5 24235.1 1533.94  20 
  -9   1   5 25129.1 1677.22  25 
  -9   1   5 24753.0 1482.96  10 
  -9   1   5 26073.4 1705.09  18 
  -9  -1   5 24728.3 1503.19  24 
  -9   1   5 19756.4 4195.10   2 
  -9   1   5 25259.9 1679.30  24 
  -9   1   5 19944.5 4262.50   3 
  -9  -1  -5 29777.1 1452.80  10 
  -9  -1  -5 27633.1 1706.81  23 
  -9  -1  -5 30547.8 1827.62  27 
  -9   1  -5 27137.9 1442.00  12 
  -9   1  -5 27816.5 1471.56  10 
  -9  -1  -5 24883.7 1432.61  12 
  -9   1   5 22886.3 1814.81  26 
  -9   1   5 26487.8 1511.14  17 
  -9   1  -5 30310.4 3618.24   1 
  -9   1  -5 27143.2 1644.91  27 
  -9  -1  -5 25044.0 3160.50   1 
  -9   1  -5 30388.9 2080.37  18 
  -9  -1  -5 25759.8 2163.54  18 
  -9  -1   5 27479.7 1855.54  26 
  -9   1   6 88.6523 264.526  26 
  -9   1   6 415.751 216.672  17 
  -9  -1  -6 420.735 365.025   1 
  -9   1   6 87.5010 77.2440  20 
  -9   1  -6 280.953 192.211  10 
  -9   1  -6 238.253 182.397  23 
  -9   1   6-190.263 840.954   3 
  -9   1   6 111.307 136.070  24 
  -9  -1  -6 268.122 133.542  10 
  -9   1   6 262.711 199.778  18 
  -9  -1  -6 152.320 69.0308  12 
  -9   1   6 379.719 250.224  25 
  -9   1  -6 239.467 193.180   1 
  -9   1  -6 130.665 137.739  12 
  -9  -1   6 103.124 159.373  26 
  -9   1  -6 392.213 245.085  18 
  -9  -1   6 385.610 191.823  24 
  -9  -1   6 100.281 87.8603  25 
  -9  -1  -6 383.985 187.542  23 
  -9  -1   6 125.466 122.524  20 
  -9  -1  -6 280.894 114.590  27 
  -9   1   6 289.581 489.379   2 
  -9  -1   6 146.242 118.275  18 
  -9  -1  -6 478.942 334.973  18 
  -9  -1   7 149.071 134.420  18 
  -9   1   7 198.052 89.9877   8 
  -9   1   7 176.268 124.568  17 
  -9  -1   7 138.211 157.251  20 
  -9   1  -7 198.471 139.612  10 
  -9   1   7 343.041 275.202  25 
  -9  -1  -7 125.433 401.366   1 
  -9   1  -7 223.042 158.769  18 
  -9  -1  -7 246.927 194.404  23 
  -9   1   7 181.039 317.778  26 
  -9  -1   7 232.440 134.339  25 
  -9  -1   7 374.393 245.105  24 
  -9  -1  -7 188.704 154.627  12 
  -9   1  -7 226.972 296.777   1 
  -9   1  -7 90.5190 98.0145  12 
  -9  -1  -7 167.549 88.0303  18 
  -9   1   7 156.416 146.719  24 
  -9  -1   7 159.625 217.010  26 
  -9   1  -7-100.155 132.852  23 
  -9  -1  -7 225.281 105.946  10 
  -9  -1  -7 120.381 97.6605  27 
  -9   1   7 821.409 299.792  20 
  -9   1  -8 20869.0 1378.67  10 
  -9   1   8 21279.0 1721.56  24 
  -9   1   8 19707.3 1690.23  26 
  -9   1   8 20441.5 1439.86  20 
  -9  -1  -8 22480.4 1337.48  10 
  -9   1  -8 22344.2 1664.45  23 
  -9  -1  -8 25325.0 1806.10  23 
  -9   1   8 19407.0 1164.04   8 
  -9  -1   8 20913.5 1602.38  24 
  -9  -1  -8 21971.3 1619.01  27 
  -9   1   8 19406.5 1433.95  17 
  -9  -1  -8 21340.7 1399.86  12 
  -9  -1  -8 22331.5 3611.63   1 
  -9  -1  -8 20563.9 1953.02  18 
  -9  -1   8 20969.8 1606.64  25 
  -9   1  -8 19176.8 3376.54   1 
   9  -1   8 24105.7 1439.56   9 
  -9   1  -8 20637.4 1332.31  12 
  -9   1  -8 25140.6 1947.84  18 
  -9   1   8 21046.3 1725.98  25 
  -9  -1   8 20349.1 1711.97  26 
  -9  -1   8 21867.4 1444.13  20 
  -9  -1  -9 23101.1 2072.83  18 
  -9  -1  -9 21874.4 1355.57  10 
  -9  -1   9 19464.3 1694.24  26 
  -9   1  -9 23277.6 1834.45  18 
  -9   1  -9 21396.5 1415.70  10 
  -9  -1  -9 22919.1 1688.12  27 
  -9   1   9 19451.7 1729.23  24 
  -9   1   9 17986.8 1708.09  26 
   9  -1   9 21723.8 1397.28   9 
  -9   1  -9 20449.0 1364.87  12 
  -9   1   9 19774.3 1444.35  20 
  -9  -1   9 20005.6 1608.29  25 
  -9  -1   9 19765.1 1606.71  24 
  -9   1   9 19375.7 1462.71  17 
  -9   1   9 19633.6 1750.64  25 
  -9  -1  -9 22905.2 1498.08  12 
  -9  -1  -9 21371.0 1670.79  23 
  -9   1   9 19027.2 1182.41   8 
  -9  -1   9 20985.1 1455.47  20 
  -9   1  -9 21246.9 1626.20  23 
  -9  -1 -10 16548.1 1213.03  10 
  -9  -1  10 16372.6 1524.84  24 
  -9   1 -10 16485.4 1303.04  10 
  -9   1 -10 18736.2 1579.39  23 
  -9  -1  10 16177.7 1500.52  25 
   9  -1  10 18598.9 1311.49   9 
  -9   1 -10 17831.7 1574.98  18 
  -9   1  10 15978.6 1336.03  20 
  -9  -1 -10 16302.2 1706.26  18 
  -9   1  10 16337.6 1593.51  24 
  -9  -1 -10 17181.2 1332.78  12 
  -9  -1 -10 17963.5 1566.41  23 
  -9  -1  10 17233.8 1302.74  20 
  -9   1  10 15032.0 1061.30   8 
  -9   1  10 15691.4 1568.37  25 
  -9   1  10 16409.7 1543.53  26 
  -9  -1  10 15397.7 1502.69  26 
  -9   1 -10 17763.7 1260.96  12 
  -9   1  10 13722.7 1300.84  17 
  -9   1  11 1868.30 570.867  26 
  -9   1  11 2150.51 589.812  24 
  -9  -1  11 2323.03 602.626  24 
  -9  -1  11 2002.83 559.741  26 
  -9  -1  11 2077.97 550.763  25 
  -9  -1  11 2220.93 444.775  20 
  -9   1  11 2010.03 473.861  17 
  -9   1  11 2371.13 626.297  25 
  -9  -1 -11 2622.37 521.628  12 
  -9  -1 -11 2986.06 574.803  23 
  -9   1  11 1809.61 358.296   8 
   9  -1  11 2756.18 484.101   9 
  -9   1 -11 2749.75 516.894  10 
  -9  -1 -11 2495.88 461.431  10 
  -9   1 -11 2777.16 496.168  12 
  -9  -1 -11 2174.09 606.033  18 
  -9   1  11 2277.60 490.808  20 
  -9  -1 -12 1874.85 404.719  10 
  -9  -1  12 1737.19 420.135  20 
  -9  -1 -12 1823.55 415.060  12 
  -9   1  12 2087.08 482.460  20 
  -9  -1  12 1749.67 505.972  25 
  -9   1  12 1297.88 456.144  25 
  -9   1  12 1375.78 453.235  26 
   9  -1  12 1925.06 446.441   9 
   9   1  12 1977.31 424.715   9 
  -9  -1  12 1632.30 536.618  26 
  -9   1 -12 1771.19 414.191  12 
  -9  -1 -12 2342.82 540.023  23 
  -9   1 -12 1949.93 448.866  10 
  -9   1  12 1672.63 525.023  24 
  -9   1  12 1334.53 371.581  17 
  -9  -1  12 1746.43 492.390  24 
  -9   1  13 4816.50 774.278  17 
  -9  -1  13 5249.83 906.996  26 
  -9  -1 -13 5942.64 746.081  10 
  -9  -1  13 5591.51 942.795  24 
  -9   1  13 5442.92 911.209  26 
  -9   1 -13 6097.84 751.172  12 
   9   1  13 6480.85 797.387   9 
  -9   1  13 6075.10 1010.89  24 
  -9  -1 -13 7383.84 996.562  23 
  -9  -1 -13 6218.20 794.589  12 
  -9   1 -13 6127.68 786.802  10 
  -9   1  13 5571.71 996.533  25 
   9  -1  13 5646.79 746.485   9 
  -9  -1  13 5120.04 877.379  25 
   9  -1  13 6133.87 714.858  15 
  -9   1  14 12774.5 1215.14  17 
  -9   1 -14 16713.8 1320.65  10 
  -9   1  14 14530.4 1401.90  26 
  -9  -1 -14 17485.5 1569.13  23 
   9  -1  14 15399.9 1178.24  15 
   9   1  14 16611.9 1296.23   9 
   9  -1  14 16017.0 1274.92   9 
  -9   1  14 15979.4 1647.46  25 
  -9  -1  14 14975.4 1441.35  26 
  -9  -1 -14 14982.2 1254.92  12 
  -9  -1  14 14528.2 1497.40  25 
  -9   1  14 16723.8 1678.51  24 
  -9  -1 -14 16159.4 1214.36  10 
  -9  -1  14 13663.6 1444.35  24 
  -9   1 -14 17627.0 1243.09  12 
   9  -1  15 17177.4 1233.02  15 
  -9   1  15 15574.3 1574.22  25 
  -9  -1  15 15373.4 1525.59  25 
  -9   1 -15 14937.3 1247.47  10 
  -9  -1 -15 15615.9 1278.48  12 
   9   1  15 15751.2 1232.10   9 
  -9  -1 -15 15116.0 1177.08  10 
  -9  -1  15 14763.6 1394.97  26 
  -9  -1  15 15271.1 1523.31  24 
  -9   1  15 16029.7 1610.49  24 
  -9   1  15 14313.4 1402.92  26 
   9  -1  15 16565.2 1284.53   9 
  -9   1  15 13186.8 1200.09  17 
  -9  -1 -16 13163.9 1107.36  12 
  -9   1  16 13223.6 1206.04  26 
  -9   1  16 13281.2 1407.92  25 
   9   1  16 14325.5 1137.85   9 
  -9   1  16 12777.4 1393.48  24 
  -9  -1  16 13927.4 1384.76  24 
   9  -1  16 14565.8 1107.54  15 
  -9  -1  16 12873.8 1320.01  25 
  -9   1 -16 14357.2 1165.40  10 
  -9  -1  16 12397.2 1207.78  26 
   9  -1  16 14197.1 1156.78   9 
  -9   1  16 9279.47 970.417  17 
  -9  -1 -16 13339.6 1050.44  10 
  -9   1  17 7037.96 964.831  25 
  -9  -1  17 6791.39 919.595  25 
  -9  -1 -17 6703.78 748.695  12 
   9   1  17 6866.14 743.832  15 
  -9  -1  17 6739.89 823.708  26 
  -9  -1  17 7086.89 926.683  24 
  -9  -1 -17 5780.13 685.540  10 
  -9   1  17 4347.46 626.416  17 
   9  -1  17 7595.88 765.910  15 
   9   1  17 7611.71 773.235   9 
  -9   1 -17 7293.26 792.638  10 
   9  -1  17 7698.56 821.843   9 
  -9   1  17 6224.19 801.379  26 
  -9   1  17 7088.41 970.616  24 
  -9   1 -18-14.2398 112.331  10 
   9   1  18 49.2712 31.3417  15 
   9  -1  18 72.5498 113.886   9 
  -9   1  18 19.8834 72.8731  24 
  -9   1  18 50.1920 169.140  17 
  -9  -1 -18 157.599 135.006  12 
  -9  -1  18 192.471 182.504  24 
  -9   1  18 8.81194 48.1602  25 
   9   1  18-36.0575 110.879   9 
  -9  -1  18 292.660 261.417  25 
  -9   1  18-162.507 103.831  26 
  -9  -1  18-17.1845 159.551  26 
   9  -1  18-31.0813 90.0282  15 
   9  -1  19 730.232 250.972   9 
  -9   1  19 1209.13 345.532  26 
  -9   1  19 690.317 240.244  24 
  -9  -1  19 821.316 285.113  25 
   9  -1  19 891.310 221.368  15 
   9   1  19 903.697 235.976   9 
  -9  -1  19 543.088 208.891  24 
  -9   1  19 843.998 290.078  25 
   9   1  19 920.913 244.270  15 
  -9   1 -19 701.401 197.042  10 
  -9  -1  19 465.215 159.913  26 
  -9  -1  20 1147.38 287.162  25 
  -9  -1  20 1412.75 314.656  24 
  -9   1  20 1276.32 301.403  24 
  -9   1  20 1187.83 263.815  26 
   9  -1  20 1863.44 300.644  15 
  -9   1  20 1303.63 297.483  25 
   9   1  20 1612.19 268.035  15 
 -10   1   0 24716.6 1458.81  27 
 -10  -1   0 23385.6 1660.32  27 
 -10  -1   0 19748.4 3837.57   2 
 -10   1   0 22456.8 1832.69  18 
 -10  -1   0 26334.6 1454.77  10 
 -10   1   0 26654.7 1535.41  10 
 -10  -1   0 23109.0 1979.85  18 
 -10   1   0 20211.9 4201.13   2 
 -10  -1   0 18704.5 3802.46   3 
 -10   1   0 21057.0 4389.82   3 
 -10  -1  -1 22138.9 1364.42  12 
 -10   1  -1 25281.3 1537.80  10 
 -10  -1  -1 20227.2 3920.95   2 
 -10   1  -1 25505.8 1518.00  27 
 -10  -1  -1 26398.4 1462.27  10 
 -10   1   1 19662.0 4231.33   3 
 -10  -1   1 24356.8 1411.03  10 
 -10   1   1 22731.0 1431.37  10 
 -10   1   1 23202.6 1765.37  18 
 -10   1  -1 22924.8 1791.50  18 
 -10   1  -1 19867.3 4302.34   3 
 -10  -1   1 19196.3 3786.95   2 
 -10   1  -1 19811.1 4185.22   2 
 -10  -1   1 21161.9 1588.27  27 
 -10  -1   1 23088.4 1913.09  18 
 -10  -1  -1 25501.7 2148.23  18 
 -10  -1  -1 23110.8 1662.86  27 
 -10  -1   1 19730.3 3912.69   3 
 -10  -1  -1 20114.4 3987.65   3 
 -10   1   1 18787.9 3997.88   2 
 -10  -1  -2 5705.55 769.507  23 
 -10   1   2 4872.33 2103.03   2 
 -10   1   2 5662.67 732.269  10 
 -10  -1   2 5135.91 2036.76   3 
 -10   1  -2 6065.76 2307.78   3 
 -10  -1  -2 6976.34 1126.76  18 
 -10  -1   2 4999.27 1938.15   2 
 -10  -1  -2 5347.11 698.401  12 
 -10   1  -2 7003.39 807.777  27 
 -10  -1  -2 5261.67 1952.15   2 
 -10   1  -2 5116.82 2156.64   2 
 -10   1   2 6612.64 927.301  18 
 -10  -1  -2 7099.41 779.878  10 
 -10  -1   2 6197.59 936.734  26 
 -10   1   2 4904.42 2158.92   3 
 -10   1  -2 7522.59 872.755  10 
 -10  -1   2 6469.00 744.790  10 
 -10  -1   2 4606.05 735.007  27 
 -10  -1  -2 5522.32 2145.33   3 
 -10   1   2 4819.43 701.958  20 
 -10   1  -2 6729.02 1020.22  18 
 -10  -1   2 6007.28 967.042  18 
 -10  -1  -2 6408.82 885.966  27 
 -10  -1   3 710.133 342.616  26 
 -10  -1   3 371.503 424.157   3 
 -10  -1  -3 833.746 302.521  27 
 -10  -1  -3 742.143 283.589  10 
 -10   1  -3 650.504 249.778  12 
 -10   1  -3 660.227 336.229  18 
 -10   1   3 418.309 217.024  10 
 -10  -1   3 592.476 293.338  18 
 -10  -1   3 482.850 240.296  10 
 -10   1   3 533.551 713.485   2 
 -10  -1   3 616.848 188.370  20 
 -10   1   3 621.253 285.711  18 
 -10   1  -3 292.343 363.204   3 
 -10  -1  -3 534.521 622.225   2 
 -10   1  -3-3.66024 512.097   2 
 -10  -1  -3 331.117 226.283  18 
 -10  -1  -3 647.092 203.044  23 
 -10  -1  -3 678.383 785.831   3 
 -10   1  -3 805.523 286.799  27 
 -10  -1  -3 524.850 213.604  12 
 -10   1   3 364.301 142.035  20 
 -10   1  -3 762.480 268.433  10 
 -10   1   3 64.4710 481.192   3 
 -10  -1   3 310.395 523.746   2 
 -10   1  -4 3830.74 1865.55   3 
 -10   1   4 2988.48 1567.91   2 
 -10  -1  -4 3566.45 1791.41   2 
 -10   1  -4 3828.26 1830.78   2 
 -10   1  -4 4063.94 792.370  18 
 -10  -1  -4 3674.47 579.705  12 
 -10   1   4 3463.90 584.667  10 
 -10  -1   4 2091.32 1367.41   2 
 -10   1  -4 3983.18 587.072  10 
 -10   1   4 3338.05 1764.06   3 
 -10  -1  -4 4540.90 705.936  27 
 -10  -1  -4 4389.38 664.944  23 
 -10   1   4 3470.23 677.582  18 
 -10   1   4 3343.14 604.639  20 
 -10  -1   4 3966.87 723.828  18 
 -10   1   4 3455.51 739.160  26 
 -10  -1   4 3281.35 738.088  26 
 -10  -1  -4 4465.69 616.029  10 
 -10  -1  -4 2902.40 1543.38   3 
 -10  -1   4 3696.53 634.157  20 
 -10   1  -4 3321.44 541.225  12 
 -10  -1   4 1973.46 1259.77   3 
 -10  -1  -4 4040.56 834.885  18 
 -10   1   5 1716.36 480.458  26 
 -10  -1  -5 2672.56 533.106  23 
 -10   1  -5 2133.78 434.115  12 
 -10  -1  -5 2481.67 647.892  18 
 -10   1   5 1984.18 453.007  20 
 -10  -1  -5 2282.67 432.207  12 
 -10   1   5 2052.26 494.019  25 
 -10   1   5 1551.00 430.175  10 
 -10   1  -5 2241.49 441.378  10 
 -10  -1   5 2518.30 565.724  18 
 -10   1   5 689.908 975.651   2 
 -10   1   5 1921.58 492.068  24 
 -10   1  -5 2678.98 651.204  18 
 -10   1   5 1967.60 501.582  18 
 -10  -1   5 2000.39 463.042  20 
 -10   1   5 1363.26 1078.16   3 
 -10  -1  -5 2841.24 569.253  27 
 -10  -1  -5 2643.69 461.715  10 
 -10  -1   5 2114.60 491.340  26 
 -10   1  -5 2002.30 893.883   1 
 -10  -1  -6 7623.90 787.037  10 
 -10  -1   6 6476.03 984.421  26 
 -10   1   6 5959.60 857.324  25 
 -10  -1  -6 8168.95 1240.20  18 
 -10  -1   6 7074.82 928.269  18 
 -10  -1   6 6305.59 811.628  25 
 -10   1  -6 7074.93 1819.91   1 
 -10   1   6 7243.42 878.015  20 
 -10   1   6 6317.96 1015.48  26 
 -10  -1   6 5972.39 808.765  24 
 -10   1  -6 8179.28 1171.72  18 
  10  -1   6 8600.55 685.373  15 
 -10   1  -6 7507.85 806.160  10 
 -10   1  -6 7535.40 795.808  12 
 -10   1   6 6352.57 661.205   8 
 -10  -1   6 6882.09 846.345  20 
 -10  -1  -6 8166.82 946.353  23 
 -10   1   6 7025.04 909.378  18 
 -10   1   6 6237.04 877.643  24 
 -10  -1  -6 7450.43 970.983  27 
 -10  -1  -6 7068.27 813.929  12 
 -10   1   7 5392.05 842.838  24 
 -10   1   7 5127.85 824.913  25 
 -10  -1  -7 6551.81 910.180  23 
  10  -1   7 6312.38 614.850  15 
 -10   1   7 5009.79 588.358   8 
 -10   1   7 5052.65 903.587  26 
 -10  -1   7 5038.20 872.026  26 
 -10   1  -7 5904.33 739.076  10 
 -10  -1   7 5459.67 771.894  20 
 -10  -1  -7 5763.23 733.093  12 
 -10  -1   7 5243.46 781.331  24 
 -10  -1  -7 6406.94 715.922  10 
 -10   1   7 5539.45 805.354  20 
 -10  -1  -7 6984.06 895.181  27 
 -10  -1   7 5157.35 784.444  25 
 -10  -1  -7 5884.47 1028.25  18 
 -10   1  -7 6697.89 1018.17  18 
 -10   1  -7 5328.14 715.896  12 
 -10  -1   7 5349.48 790.524  18 
 -10   1   8 30.5927 76.8230   8 
 -10  -1   8 44.6360 151.565  25 
 -10  -1  -8 3.54422 146.848  12 
  10  -1   8-61.7613 82.5517   9 
 -10  -1  -8-31.0231 95.3930  10 
 -10  -1   8-41.7977 191.040  26 
 -10   1  -8 127.257 178.852  10 
 -10  -1   8 91.7174 138.873  24 
 -10   1  -8-93.6099 154.240  18 
 -10   1   8-24.2187 187.190  26 
  10  -1   8 62.1890 116.911  15 
 -10   1  -8-87.1126 107.648  12 
 -10  -1   8 168.710 193.432  20 
 -10  -1  -8 21.6618 198.723  27 
 -10   1   8-218.758 177.218  17 
 -10   1   8-56.6007 107.348  25 
 -10   1   8-188.899 127.341  20 
 -10   1   8-154.385 221.277  24 
 -10  -1  -8 3.24334 66.7597  23 
 -10  -1  -8 92.1488 297.679  18 
 -10   1   9 459.254 267.960  17 
 -10  -1   9 457.024 229.771  25 
 -10   1  -9 582.489 246.135  10 
 -10   1   9 460.375 208.758  25 
 -10  -1   9 119.291 110.137  26 
 -10  -1  -9 495.955 182.832  18 
 -10  -1   9 387.992 110.706  20 
 -10  -1   9 385.282 183.620  24 
 -10  -1  -9 495.172 269.475  23 
 -10  -1  -9 649.453 217.606  10 
 -10   1   9 374.702 199.591   8 
 -10   1   9 491.520 214.024  20 
 -10   1  -9 683.211 264.692  12 
 -10  -1  -9 538.188 324.375  27 
 -10   1  -9 659.775 276.999  18 
 -10   1   9 403.566 301.800  24 
  10  -1   9 463.898 216.509   9 
  10  -1   9 381.725 159.842  15 
 -10   1   9 446.687 279.921  26 
 -10  -1  -9 508.343 215.195  12 
  10  -1  10 2465.09 497.937   9 
 -10   1 -10 2395.22 484.926  10 
 -10  -1 -10 2616.09 475.006  10 
 -10  -1  10 2105.51 527.465  25 
 -10  -1  10 2099.82 550.760  24 
 -10   1  10 2368.97 612.082  25 
 -10   1  10 1742.99 479.668  17 
  10  -1  10 2502.83 419.799  15 
 -10  -1 -10 2989.47 609.755  23 
 -10   1  10 1952.30 583.146  26 
 -10  -1  10 2331.49 561.459  26 
 -10   1  10 2022.97 567.638  24 
 -10  -1 -10 2571.65 492.798  12 
 -10  -1 -10 2306.86 605.212  18 
 -10   1 -10 2291.76 445.461  12 
 -10   1  10 2183.05 481.556  20 
 -10   1 -10 2456.01 568.195  18 
 -10  -1  10 2084.00 463.551  20 
 -10   1  11 12674.5 1210.10  17 
 -10  -1  11 15786.7 1516.65  25 
 -10   1  11 14917.2 1561.02  24 
 -10  -1 -11 17817.8 1672.17  18 
 -10   1 -11 16503.1 1295.43  10 
 -10   1 -11 16180.7 1250.94  12 
 -10  -1 -11 16907.6 1233.28  10 
 -10  -1  11 14414.4 1509.86  26 
 -10  -1 -11 16853.1 1342.21  12 
 -10   1  11 15384.7 1336.54  20 
  10  -1  11 15710.3 1140.18  15 
 -10   1  11 15263.0 1586.84  25 
 -10   1  11 15679.9 1565.02  26 
 -10  -1  11 15819.3 1317.75  20 
 -10  -1 -11 17206.9 1556.92  23 
  10  -1  11 17118.2 1304.18   9 
 -10  -1  11 15656.3 1499.72  24 
 -10  -1  12 2298.95 542.997  26 
 -10  -1  12 2502.99 630.512  24 
 -10   1  12 2098.92 477.829  17 
 -10  -1 -12 3069.76 518.014  10 
 -10   1  12 2779.66 693.291  25 
 -10   1 -12 3104.66 517.428  12 
  10  -1  12 3016.73 469.010  15 
 -10   1 -12 3113.91 526.518  10 
 -10  -1  12 2524.97 528.217  20 
 -10   1  12 2344.15 654.438  24 
 -10  -1 -12 2754.20 545.470  12 
 -10  -1  12 2514.83 605.857  25 
  10   1  12 2691.35 508.495   9 
 -10   1  12 2449.93 553.113  20 
 -10  -1 -12 3237.40 657.071  23 
 -10   1  12 2347.38 570.822  26 
  10  -1  12 3091.06 525.954   9 
 -10   1  13 1851.11 526.985  24 
 -10  -1  13 1229.61 455.588  24 
 -10   1 -13 1516.52 374.436  12 
 -10  -1  13 1275.83 397.691  26 
 -10  -1 -13 2278.49 559.222  23 
 -10   1  13 716.405 214.347  17 
 -10   1 -13 1817.92 402.063  10 
  10  -1  13 1636.40 369.372   9 
 -10   1  13 1609.35 549.211  25 
  10  -1  13 1618.55 348.134  15 
 -10  -1  13 1321.98 445.219  25 
 -10  -1 -13 1691.02 370.165  10 
 -10   1  13 1353.93 441.835  26 
  10   1  13 1735.20 411.534   9 
 -10  -1 -13 1854.52 404.875  12 
 -10   1 -14 3361.70 527.114  12 
 -10   1  14 3292.38 709.047  24 
 -10  -1 -14 3154.37 501.390  10 
 -10  -1  14 3015.94 691.740  25 
 -10  -1  14 2823.50 665.976  24 
 -10   1  14 2643.48 617.191  26 
  10  -1  14 3403.24 493.677  15 
 -10   1 -14 3378.77 555.451  10 
 -10  -1  14 2524.41 547.018  26 
 -10   1  14 2252.50 487.535  17 
  10  -1  14 3562.56 590.938   9 
 -10  -1 -14 3152.29 553.720  12 
 -10   1  14 3131.78 666.823  25 
  10   1  14 3374.33 554.955   9 
  10  -1  15 159.494 131.964   9 
 -10   1  15-205.126 225.039  26 
 -10   1  15 185.282 253.989  25 
 -10  -1 -15-36.4949 23.5209  12 
 -10   1 -15-76.2811 100.157  10 
  10   1  15-70.9008 113.461   9 
 -10  -1  15 119.165 249.300  24 
  10  -1  15 64.8531 94.2914  15 
 -10  -1  15-137.123 60.6682  26 
 -10  -1  15 42.7403 101.441  25 
 -10  -1 -15 132.354 100.777  10 
 -10   1  15 206.659 200.282  17 
 -10   1  15 73.0866 225.880  24 
 -10   1  16 32.2707 206.502  26 
  10   1  16 64.3377 91.8892   9 
  10  -1  16 46.6069 69.1997  15 
 -10  -1  16 104.742 102.968  25 
 -10  -1  16-41.6697 115.873  26 
  10  -1  16 247.005 142.879   9 
 -10  -1  16 80.6666 100.963  24 
 -10   1 -16 107.367 51.9785  10 
 -10   1  16-32.2495 124.047  25 
  10   1  16 126.673 99.1420  15 
 -10  -1 -16 35.6696 29.1699  12 
 -10  -1 -16 146.497 101.362  10 
 -10   1  16 36.4162 107.250  24 
 -10   1 -17 11999.1 942.500  10 
 -10   1  17 10933.1 1110.87  25 
  10   1  17 12559.6 936.938  15 
 -10  -1  17 11430.9 1112.10  24 
 -10  -1  17 11503.7 1036.84  26 
 -10   1  17 11192.0 1125.23  24 
 -10   1  17 11030.2 1014.05  26 
  10  -1  17 12086.2 1010.59   9 
 -10  -1  17 11208.9 1107.96  25 
  10   1  17 11973.1 946.763   9 
  10  -1  17 12329.4 923.295  15 
 -10  -1 -17 11687.8 892.248  12 
 -10   1 -18 12689.0 869.650  10 
  10   1  18 13737.8 901.486  15 
  10  -1  18 13553.4 906.346  15 
 -10   1  18 12260.6 1091.29  24 
 -10   1  18 11081.5 929.130  26 
  10  -1  18 13354.5 989.293   9 
 -10  -1  18 12475.4 1060.45  25 
  10   1  18 14320.2 948.255   9 
 -10  -1  18 11985.0 993.610  26 
 -10   1  18 12149.5 1087.93  25 
 -10  -1  18 12716.8 1077.24  24 
 -10   1  19 4784.71 598.484  24 
  10  -1  19 5632.13 581.451   9 
 -10  -1  19 4825.10 594.758  25 
 -10  -1  19 4676.54 576.620  24 
 -10  -1  19 4313.85 532.836  26 
 -10   1  19 4218.21 527.985  26 
  10   1  19 5573.97 523.857   9 
 -10   1  19 4961.07 609.404  25 
  10  -1  19 5801.31 527.058  15 
  10   1  19 5674.78 519.152  15 
 -11  -1   0 192.489 175.604  18 
 -11  -1   0 99.9563 75.6155  27 
 -11  -1   0-34.4747 82.3887  10 
 -11   1   0-53.2491 86.3751  10 
 -11  -1   0 326.646 648.696   2 
 -11   1   0-33.4878 63.9590  18 
 -11  -1   0 152.668 183.481   3 
 -11  -1   1-129.219 171.393  27 
 -11   1   1-105.596 115.904  20 
 -11   1  -1-178.804 115.975  18 
 -11  -1   1-110.601 499.013   3 
 -11  -1  -1 500.745 782.568   3 
 -11  -1  -1 251.366 483.315   2 
 -11   1   1-76.3777 118.677  18 
 -11  -1  -1-57.3473 94.1486  10 
 -11  -1  -1 173.995 284.998  27 
 -11  -1   1 3.35777 316.725   2 
 -11  -1   1-64.2720 79.7642  26 
 -11   1  -1 170.302 138.976  10 
 -11  -1  -1-80.0462 59.2109  18 
 -11   1   1-9.56306 103.514  10 
 -11  -1   1 27.9974 103.452  10 
 -11  -1   1 82.1410 123.170  18 
 -11  -1   2 7285.47 2466.21   2 
 -11   1   2 11392.6 1318.44  18 
 -11   1   2 8429.22 1021.13  20 
 -11  -1  -2 12238.0 1096.29  10 
 -11   1  -2 11565.9 1382.76  18 
 -11  -1  -2 13559.9 1108.24  23 
 -11   1  -2 12699.4 1155.33  10 
 -11  -1   2 11552.8 1323.86  26 
 -11  -1  -2 12104.5 1482.48  18 
 -11  -1  -2 12450.1 1213.84  27 
 -11  -1  -2 10790.5 1010.82  12 
 -11  -1   2 6627.37 2422.49   3 
 -11  -1   2 9672.21 1038.76  10 
 -11   1   2 10492.4 1066.94  10 
 -11  -1   2 12169.6 1412.00  18 
 -11  -1   3 8444.03 1029.48  20 
 -11  -1  -3 12208.4 1527.86  18 
 -11   1  -3 10280.2 1293.95  18 
 -11  -1  -3 10913.0 1059.90  23 
 -11  -1   3 8116.54 997.869  10 
 -11  -1   3 10700.0 1302.30  18 
 -11   1   3 9253.44 989.945  10 
 -11   1   3 8532.61 1175.86  26 
 -11  -1  -3 9142.26 969.417  12 
 -11  -1  -3 10657.2 1138.98  27 
 -11   1  -3 11901.3 1162.82  10 
 -11   1   3 8548.79 1057.62  20 
 -11   1   3 10186.3 1230.53  18 
 -11  -1   3 9536.85 1230.56  26 
 -11  -1  -3 10836.0 1045.56  10 
 -11   1  -4 16468.7 1287.34  10 
 -11  -1  -4 14621.9 1251.43  23 
 -11   1   4 11794.1 1401.02  26 
 -11  -1  -4 14334.9 1338.15  27 
 -11  -1  -4 16621.9 1264.49  10 
 -11   1   4 13720.6 1388.55  18 
 -11  -1   4 12566.5 1371.06  26 
 -11  -1  -4 12910.9 1133.09  12 
 -11  -1   4 11902.0 1220.53  20 
 -11   1  -4 14515.4 1557.07  18 
 -11  -1  -4 15493.8 1762.13  18 
 -11   1   4 13008.3 1158.73  10 
 -11   1  -4 12076.0 1125.86  12 
 -11  -1   4 14323.6 1471.43  18 
 -11   1   4 12625.7 1262.61  20 
 -11  -1  -5 2816.47 593.115  27 
 -11  -1  -5 3412.64 605.100  23 
 -11   1  -5 2962.62 536.328  10 
 -11  -1   5 2587.75 556.604  20 
 -11  -1  -5 3660.09 595.863  10 
 -11  -1  -5 2723.46 700.096  18 
 -11   1   5 2712.68 605.967  18 
 -11   1  -5 2663.86 525.280  12 
 -11  -1  -5 2758.25 537.596  12 
 -11   1   5 2648.25 692.654  26 
 -11  -1   5 2498.23 582.639  26 
 -11   1   5 2345.23 536.881  20 
 -11   1  -5 3211.66 706.950  18 
 -11  -1   5 2706.05 606.340  18 
 -11  -1  -6 1664.66 461.673  27 
 -11   1   6 1039.95 371.920  25 
 -11   1   6 1442.19 522.148  26 
 -11   1  -6 1332.39 363.460  12 
 -11   1   6 1349.90 411.328  20 
 -11   1  -6 1609.04 394.625  10 
 -11  -1  -6 1727.04 607.309  18 
 -11  -1  -6 1689.92 438.766  23 
 -11  -1  -6 1474.06 374.940  12 
  11  -1   6 1460.16 339.722   9 
 -11   1  -6 1591.05 532.585  18 
 -11   1   6 1133.51 354.004  24 
 -11  -1   6 1549.44 446.630  18 
 -11  -1   6 1489.08 431.457  20 
 -11  -1   6 1364.22 469.193  26 
 -11   1   6 1343.25 320.854   8 
 -11  -1  -6 1704.46 386.490  10 
 -11  -1  -7 181.680 133.342  12 
  11  -1   7 206.937 142.658   9 
 -11   1  -7 154.728 97.3369  10 
 -11  -1  -7 348.136 170.627  10 
 -11  -1   7 77.7187 139.953  20 
 -11  -1  -7 229.747 117.402  18 
 -11  -1   7 133.180 59.8586  18 
 -11   1   7 161.046 189.208  24 
 -11  -1  -7 427.915 308.192  23 
 -11   1   7 236.723 151.170  25 
 -11   1   7 79.8167 82.1796   8 
 -11  -1  -7 118.131 86.8872  27 
 -11   1  -7 281.203 276.179  18 
 -11   1   7 78.7472 105.819  26 
 -11   1   7 172.489 183.295  20 
 -11  -1   7 101.649 50.7253  26 
 -11   1  -7 235.855 140.612  12 
 -11  -1   8 3147.05 584.356  25 
 -11  -1  -8 4132.55 714.466  27 
 -11  -1  -8 4358.63 704.703  23 
 -11  -1  -8 3920.52 615.930  12 
 -11  -1   8 3292.16 618.810  24 
 -11  -1   8 3272.19 746.387  26 
 -11   1  -8 4119.46 625.123  10 
 -11   1  -8 4164.43 634.132  12 
  11  -1   8 4362.59 522.298  15 
 -11   1   8 3507.87 680.121  25 
 -11  -1   8 3343.68 621.451  20 
 -11  -1  -8 4571.26 643.950  10 
 -11   1   8 3355.40 748.852  26 
 -11   1   8 3387.33 656.200  20 
  11  -1   8 4356.60 637.302   9 
 -11   1  -8 5054.73 884.067  18 
 -11  -1  -8 4971.31 998.412  18 
 -11   1   8 3573.59 708.866  24 
 -11   1  -9 5536.84 738.690  10 
 -11   1   9 5425.68 894.730  25 
 -11  -1  -9 6214.64 1041.23  18 
 -11  -1   9 5133.65 820.197  24 
  11  -1   9 6271.50 661.711  15 
 -11  -1   9 5056.18 798.162  25 
 -11   1  -9 6316.58 771.468  12 
 -11  -1   9 4869.71 914.281  26 
 -11  -1  -9 6427.57 900.163  23 
 -11  -1  -9 5608.10 764.706  12 
 -11   1  -9 6637.37 993.446  18 
  11  -1   9 5657.53 747.058   9 
 -11  -1   9 5104.80 751.720  20 
 -11   1   9 5362.11 819.010  20 
 -11   1   9 5058.95 915.543  26 
 -11  -1  -9 6695.37 755.423  10 
 -11   1   9 5115.63 870.475  24 
 -11   1 -10 1128.88 344.998  10 
 -11  -1 -10 1372.41 405.309  23 
  11  -1  10 831.204 257.632  15 
 -11  -1 -10 1051.61 311.784  12 
 -11   1 -10 1354.41 412.698  18 
 -11   1  10 1032.69 434.079  26 
 -11  -1  10 814.503 300.175  25 
 -11  -1 -10 1187.62 309.134  10 
 -11  -1 -10 914.943 351.633  18 
 -11  -1  10 986.127 375.974  24 
 -11   1 -10 1098.37 290.177  12 
 -11  -1  10 989.627 343.165  20 
 -11   1  10 886.060 305.039  20 
 -11   1  10 1221.02 432.577  25 
 -11  -1  10 677.615 273.064  26 
 -11   1  10 983.307 398.747  24 
  11  -1  10 1165.90 307.472   9 
 -11   1  11 1359.07 434.605  24 
 -11  -1  11 1577.07 480.000  26 
 -11  -1  11 1457.27 417.031  20 
 -11   1 -11 2226.11 467.467  10 
 -11  -1 -11 1829.41 410.943  12 
  11  -1  11 2166.84 412.427  15 
  11  -1  11 1826.44 391.799   9 
  11   1  11 1858.75 417.959   9 
 -11  -1 -11 2085.45 545.098  23 
 -11   1  11 1413.14 455.476  26 
 -11  -1 -11 2222.06 423.190  10 
 -11  -1  11 1543.81 468.679  25 
 -11   1 -11 2125.97 444.743  12 
 -11   1  11 1734.98 501.720  25 
 -11   1  11 1743.07 442.590  20 
 -11  -1  11 1564.76 459.798  24 
 -11  -1 -11 2210.60 550.726  18 
 -11  -1  12 219.589 60.3840  24 
  11   1  12 217.088 74.3368   9 
 -11  -1  12 178.847 222.486  25 
 -11   1  12 130.774 116.397  25 
  11  -1  12 254.051 159.356   9 
 -11  -1 -12-156.287 237.308  23 
 -11   1 -12 72.5774 108.054  10 
 -11   1  12 279.275 208.189  20 
 -11  -1 -12 8.99638 101.006  12 
 -11  -1  12 219.610 237.873  20 
 -11   1  12 149.866 278.591  24 
  11  -1  12 143.570 97.2755  15 
 -11  -1 -12 177.774 166.562  10 
 -11  -1  12 153.326 170.582  26 
 -11   1 -12 255.756 213.922  12 
 -11   1  12-100.517 146.299  26 
 -11  -1  13 4907.67 798.927  25 
 -11   1  13 4588.99 832.189  25 
 -11   1  13 4376.11 796.566  24 
 -11  -1  13 4927.24 799.573  24 
 -11  -1  13 4170.15 738.809  26 
  11  -1  13 5332.81 732.576   9 
  11  -1  13 5323.41 643.586  15 
 -11   1 -13 5618.12 708.291  10 
  11   1  13 5660.53 745.541   9 
 -11  -1 -13 5574.84 729.569  12 
 -11  -1 -13 5523.37 650.264  10 
 -11   1  13 4469.70 818.815  26 
 -11   1 -13 6238.22 726.396  12 
  11   1  14 2117.85 422.653   9 
 -11  -1 -14 2300.57 454.288  12 
  11  -1  14 1949.65 378.146  15 
 -11   1  14 2000.70 510.976  24 
 -11  -1  14 1738.61 454.682  26 
 -11   1  14 1834.68 489.877  25 
 -11   1 -14 2001.62 411.154  10 
 -11  -1  14 1808.73 468.685  25 
  11  -1  14 1972.31 417.073   9 
 -11   1  14 1370.19 439.706  26 
 -11  -1  14 1775.88 434.972  24 
 -11  -1 -14 2137.35 393.367  10 
 -11   1 -14 2086.47 407.018  12 
  11   1  14 2118.50 395.914  15 
 -11   1 -15 6224.92 691.014  10 
  11  -1  15 5127.42 663.214   9 
 -11  -1  15 5642.83 809.674  24 
  11   1  15 6529.99 720.720   9 
 -11  -1  15 4381.30 723.843  26 
 -11   1  15 5841.35 873.283  24 
 -11   1  15 5653.03 772.853  26 
  11   1  15 6167.64 652.921  15 
 -11   1  15 5857.26 852.770  25 
 -11  -1  15 5616.68 805.153  25 
 -11  -1 -15 6773.12 740.583  12 
  11  -1  15 6183.54 658.844  15 
  11   1  16 11697.3 892.426  15 
  11  -1  16 11484.0 958.354   9 
 -11   1  16 11088.9 1108.36  25 
 -11  -1 -16 11990.6 904.318  12 
  11  -1  16 11706.5 869.983  15 
 -11  -1  16 10310.8 1021.45  25 
 -11   1  16 10622.3 1072.66  24 
 -11  -1  16 10805.0 994.484  26 
  11   1  16 11921.3 943.277   9 
 -11  -1  16 10617.1 1035.08  24 
 -11   1 -16 12652.3 941.396  10 
 -11   1  16 9910.78 983.718  26 
 -11  -1  17 3198.51 507.656  25 
 -11   1  17 3198.28 549.984  24 
 -11   1  17 2983.62 493.484  26 
 -11   1 -17 3829.82 462.863  10 
  11  -1  17 4209.87 479.262  15 
 -11   1  17 3082.20 545.490  25 
  11   1  17 4010.78 504.758   9 
 -11  -1  17 3148.56 508.370  24 
  11  -1  17 3802.22 526.739   9 
 -11  -1 -17 3607.35 454.019  12 
 -11  -1  17 2925.07 464.469  26 
  11   1  17 3894.02 473.500  15 
  11   1  18 2555.79 370.957   9 
  11   1  18 2373.90 331.692  15 
  11  -1  18 2834.40 361.993  15 
 -11   1  18 2049.19 397.366  25 
 -11  -1  18 1906.10 361.897  25 
  11  -1  18 2424.33 376.573   9 
 -11  -1  18 1912.76 361.517  24 
 -11  -1  18 1726.71 370.144  26 
 -11   1  18 1986.76 370.667  26 
 -11   1  18 1681.63 355.817  24 
 -12  -1   0 88290.3 2932.09  10 
 -12  -1   0 84986.3 3968.60  18 
 -12   1   0 88043.4 3040.53  10 
 -12   1   0 86171.0 3867.81  18 
 -12  -1   0 81442.3 3137.09  27 
 -12  -1   0 76759.5 3557.21  26 
 -12   1  -1 7029.03 859.214  10 
 -12  -1  -1 7149.49 936.277  27 
 -12  -1  -1 7311.95 834.403  10 
 -12   1  -1 6441.28 1071.77  18 
 -12   1   1 5435.78 832.394  20 
 -12  -1  -1 6723.98 995.796  26 
 -12  -1  -1 7035.96 1146.37  18 
 -12  -1   1 6475.90 802.491  10 
 -12   1   1 6482.41 839.119  10 
 -12  -1   1 6436.88 1027.61  26 
 -12  -1   1 6277.95 845.898  27 
 -12  -1   1 7631.39 1170.99  18 
 -12   1   1 6734.88 1047.17  18 
 -12  -1   2 28516.4 2223.46  18 
 -12   1  -2 29396.7 2316.45  18 
 -12   1   2 26576.1 2097.11  18 
 -12   1  -2 30673.3 1789.34  10 
 -12  -1  -2 20088.3 1990.02  18 
 -12  -1  -2 25995.0 1848.79  27 
 -12   1   2 21327.6 1724.04  20 
 -12  -1   2 23439.9 1824.44  20 
 -12   1   2 26204.2 1679.01  10 
 -12   1   2 24443.8 2071.00  26 
 -12  -1   2 25065.2 2014.45  26 
 -12  -1  -2 30266.8 1675.02  10 
 -12  -1   2 26606.1 1683.97  10 
 -12  -1   3 10646.4 1200.54  20 
 -12  -1   3 12296.5 1477.64  26 
 -12   1  -3 13235.5 1537.55  18 
 -12   1   3 11593.3 1156.73  10 
 -12   1   3 11209.1 1447.70  26 
  12  -1   3 11976.5 969.275   9 
 -12   1  -3 13999.2 1215.18  10 
 -12   1   3 11556.8 1233.66  20 
 -12  -1  -3 13238.1 1324.77  27 
 -12   1   3 12287.0 1400.93  18 
 -12  -1  -3 11659.7 1134.75  12 
 -12  -1  -3 13937.5 1132.01  10 
 -12  -1  -3 12020.0 1539.81  18 
 -12  -1   3 12482.0 1458.09  18 
 -12  -1  -4 2734.76 499.949  10 
 -12   1  -4 2680.65 699.491  18 
 -12   1   4 2162.75 506.586  10 
 -12   1  -4 2932.26 570.236  10 
 -12   1   4 2309.02 616.533  18 
 -12  -1   4 2345.93 545.690  20 
 -12  -1   4 2521.31 620.127  18 
 -12   1   4 2270.82 532.846  20 
 -12  -1  -4 3280.43 636.458  27 
 -12  -1  -4 2484.97 576.085  23 
  12  -1   4 2863.78 479.603   9 
 -12  -1  -4 2372.88 524.313  12 
 -12  -1   4 2329.36 566.952  26 
 -12  -1  -4 2177.76 630.951  18 
 -12   1   4 2661.95 650.718  26 
 -12  -1  -5 8385.81 1055.97  27 
 -12   1  -5 10104.5 1085.23  10 
 -12  -1  -5 8464.56 1016.01  23 
 -12   1  -5 8318.69 1242.34  18 
 -12  -1   5 8260.66 1108.48  18 
 -12  -1   5 7156.40 941.344  20 
  12  -1   5 7694.41 808.210   9 
 -12   1   5 7521.52 1082.76  18 
 -12   1   5 7119.95 961.889  20 
 -12  -1  -5 7480.14 895.144  12 
 -12  -1  -5 9409.26 940.796  10 
 -12  -1   5 6809.49 1103.72  26 
 -12   1   5 7061.04 1106.94  26 
 -12  -1  -5 8351.07 1231.83  18 
 -12  -1  -6 7864.71 883.370  10 
 -12  -1  -6 7293.23 931.657  23 
  12  -1   6 7056.15 766.487   9 
 -12   1  -6 6550.07 1052.49  18 
 -12  -1  -6 7051.44 968.451  27 
 -12   1  -6 7054.26 888.168  10 
 -12  -1   6 5629.27 991.186  26 
 -12   1   6 5510.93 1005.18  26 
 -12  -1   6 6172.02 912.524  18 
 -12   1   6 5320.05 650.551   8 
 -12  -1   6 6041.84 848.237  20 
 -12  -1  -6 7123.98 1169.25  18 
 -12  -1  -6 6393.15 833.943  12 
 -12   1   6 5981.04 869.216  20 
 -12  -1   7 2103.42 599.041  26 
 -12  -1  -7 2582.19 567.419  23 
 -12  -1   7 2055.35 521.784  18 
 -12   1  -7 2467.47 529.274  10 
 -12  -1   7 2122.21 533.514  20 
 -12   1  -7 1906.71 447.317  12 
 -12   1  -7 2437.96 670.239  18 
 -12   1   7 2395.01 550.814  20 
 -12  -1  -7 2832.85 543.021  10 
 -12  -1  -7 2279.43 483.905  12 
 -12  -1  -7 2646.54 725.582  18 
 -12   1   7 2186.12 637.567  26 
  12  -1   7 2547.97 476.794   9 
 -12  -1  -8 4681.25 703.916  12 
 -12   1  -8 4530.17 688.348  12 
  12  -1   8 5156.18 687.251   9 
 -12  -1  -8 6130.78 787.782  10 
 -12   1  -8 5489.76 922.613  18 
 -12  -1  -8 5152.39 841.006  23 
 -12  -1   8 4118.34 809.744  26 
 -12   1   8 4229.05 872.981  26 
 -12  -1  -8 4757.83 926.072  18 
 -12   1   8 4097.46 703.134  20 
 -12   1  -8 5499.19 742.373  10 
 -12   1   8 4100.57 710.621  25 
 -12  -1   8 4479.98 742.017  20 
 -12   1   8 4308.90 718.223  24 
 -12   1  -9 2062.95 541.023  18 
 -12  -1  -9 2247.31 466.519  10 
 -12  -1  -9 1647.32 494.527  18 
  12  -1   9 1734.30 319.411  15 
 -12  -1   9 1440.68 511.320  26 
 -12   1   9 968.778 424.967  26 
 -12   1   9 1277.83 394.440  20 
 -12  -1  -9 2144.07 532.327  23 
  12  -1   9 1835.89 412.626   9 
 -12  -1   9 1436.71 374.532  24 
 -12   1  -9 1889.99 414.573  10 
 -12   1   9 1223.41 396.854  25 
 -12   1  -9 1820.01 416.815  12 
 -12   1   9 1121.90 360.991  24 
 -12  -1  -9 1759.73 395.984  12 
 -12  -1   9 1534.03 421.407  20 
 -12  -1   9 1315.38 358.090  25 
 -12  -1  10 10246.2 1286.24  26 
 -12   1 -10 14161.0 1174.55  10 
  12  -1  10 11722.3 897.055  15 
  12   1  10 12788.1 1126.48   9 
 -12   1 -10 14348.4 1423.66  18 
 -12  -1 -10 12414.3 1142.29  12 
 -12   1  10 11471.5 1267.54  24 
  12   1  10 12221.0 956.645  15 
 -12   1  10 10670.1 1212.46  25 
 -12  -1 -10 15257.3 1182.55  10 
 -12  -1  10 10517.9 1113.86  20 
 -12  -1  10 10077.6 1070.95  25 
  12  -1  10 13233.4 1123.88   9 
 -12   1  10 10852.0 1175.00  20 
 -12   1  10 10707.2 1322.10  26 
 -12   1 -10 12751.3 1099.25  12 
 -12  -1  10 10376.4 1092.54  24 
 -12  -1 -10 13922.8 1513.76  18 
  12  -1  11 2087.72 373.094  15 
 -12  -1 -11 2370.66 468.025  12 
 -12   1  11 1862.42 550.966  26 
 -12   1 -11 2270.70 441.293  12 
  12   1  11 2127.39 451.494   9 
 -12  -1  11 1661.37 393.772  20 
 -12  -1 -11 2291.35 417.972  10 
 -12  -1  11 1643.08 457.958  26 
 -12   1  11 1721.73 444.633  20 
 -12  -1  11 1562.64 411.179  25 
 -12   1  11 1702.69 445.273  24 
 -12   1 -11 2078.91 422.117  10 
  12   1  11 1873.28 387.080  15 
 -12  -1  11 1521.77 405.496  24 
  12  -1  11 1930.69 414.581   9 
 -12   1  11 1702.82 422.247  25 
 -12  -1 -11 2072.52 556.521  18 
 -12   1 -12 11043.8 1017.30  10 
  12   1  12 10494.8 971.041   9 
 -12   1  12 9085.34 1077.76  24 
 -12  -1 -12 12304.2 997.077  10 
 -12   1  12 9029.99 1067.98  25 
 -12   1 -12 11444.1 992.443  12 
 -12   1  12 8945.25 993.785  20 
  12   1  12 9848.29 835.145  15 
 -12  -1  12 8930.73 947.587  20 
 -12  -1  12 9047.57 1061.85  26 
  12  -1  12 11050.1 995.551   9 
 -12  -1  12 9114.17 1012.61  24 
  12  -1  12 9844.35 841.992  15 
 -12   1  12 9207.83 1108.11  26 
 -12  -1  12 8753.79 999.887  25 
 -12  -1 -12 11355.9 1026.90  12 
  12  -1  13 235.696 134.288   9 
 -12   1 -13 419.414 169.817  10 
 -12  -1  13 250.143 179.470  26 
 -12   1  13 387.902 230.401  25 
 -12  -1  13 274.626 200.970  24 
 -12   1  13 178.353 183.371  26 
  12   1  13 295.975 185.255   9 
 -12   1  13 197.846 133.618  24 
 -12  -1 -13 389.994 207.491  12 
  12  -1  13 259.146 70.9519  15 
  12   1  13 292.623 153.577  15 
 -12  -1  13 371.577 207.873  25 
  12  -1  14 98.7289 145.899   9 
 -12  -1 -14 121.180 94.9146  12 
 -12  -1  14-148.697 136.106  26 
 -12   1 -14-77.4832 153.025  10 
  12  -1  14-33.2279 13.0885  15 
 -12   1  14 134.654 49.4583  24 
 -12   1  14 17.3340 90.3515  25 
 -12  -1  14-92.9907 124.592  24 
  12   1  14 65.2489 30.0544  15 
 -12  -1  14 97.4621 107.480  25 
  12   1  14 43.3534 27.7789   9 
 -12   1  14-148.947 197.588  26 
 -12   1 -15 338.825 153.520  10 
  12   1  15 316.026 121.961  15 
 -12  -1 -15 353.489 162.563  12 
 -12   1  15 139.248 35.9604  24 
 -12  -1  15 493.971 204.163  26 
  12  -1  15 262.900 148.367   9 
 -12   1  15 54.3903 99.7419  25 
 -12  -1  15 374.631 191.721  24 
 -12   1  15 358.971 190.886  26 
  12   1  15 116.699 89.5104   9 
 -12  -1  15 216.207 154.138  25 
  12  -1  15 135.453 75.8896  15 
 -12   1 -16 376.743 133.135  10 
 -12  -1  16 175.993 162.683  24 
  12  -1  16 401.344 171.485   9 
  12  -1  16 341.304 128.249  15 
 -12  -1  16 216.952 150.921  25 
 -12   1  16 167.565 110.911  24 
 -12  -1  16 436.495 181.955  26 
  12   1  16 357.596 137.727   9 
 -12   1  16 286.803 134.947  26 
 -12   1  16 186.590 142.887  25 
  12   1  16 332.743 120.978  15 
 -12  -1 -16 177.395 83.6934  12 
 -12   1  17 3061.88 432.583  26 
  12  -1  17 4235.84 424.538  15 
  12   1  17 4872.49 508.943   9 
 -12  -1  17 2770.90 404.044  25 
 -12  -1  17 2919.34 426.956  24 
 -12   1  17 3032.78 452.037  25 
  12   1  17 4444.13 428.156  15 
 -12   1  17 3314.03 472.494  24 
  12  -1  17 4369.30 513.562   9 
 -12  -1  17 3162.38 419.095  26 
 -13   1   0 55.5716 69.1826  18 
 -13   1   0 56.7656 99.8240  10 
 -13  -1   0 156.028 81.3739  18 
 -13   1   0-111.329 166.773  20 
 -13  -1   0-6.79781 79.4819  27 
 -13  -1   0-42.0909 193.394  26 
 -13  -1   0-186.315 183.239  10 
 -13   1  -1 12482.5 1509.66  18 
 -13   1   1 12576.2 1234.24  10 
 -13  -1   1 14110.0 1585.18  18 
 -13   1   1 12751.7 1523.18  18 
 -13  -1  -1 13309.0 1302.52  27 
 -13   1  -1 13375.9 1233.16  10 
 -13  -1  -1 12161.2 1169.92  10 
 -13  -1   1 12528.3 1387.45  26 
 -13  -1   1 10979.4 1269.96  20 
 -13  -1   1 11821.9 1157.56  10 
 -13   1  -1 10174.9 1229.87  20 
 -13  -1  -1 11508.7 1370.66  26 
 -13   1   1 11888.8 1314.48  20 
 -13  -1  -1 13193.7 1584.34  18 
 -13   1   1 11285.0 1479.96  26 
 -13   1   2 497.436 255.699  26 
 -13   1   2 276.993 310.373  18 
 -13  -1  -2 122.276 140.193  26 
 -13  -1   2 705.834 404.411  26 
 -13  -1   2-44.9478 121.195  20 
 -13  -1  -2 234.395 216.472  27 
 -13   1  -2 151.323 140.459  10 
 -13   1   2 47.1938 98.1801  10 
 -13   1  -2 13.6119 163.133  18 
 -13   1   2-243.270 234.202  20 
 -13  -1   2 83.8231 249.201  18 
 -13  -1  -2 177.858 185.471  10 
 -13  -1  -2 175.897 163.647  18 
 -13  -1  -3 1686.02 494.894  27 
 -13   1   3 1433.55 466.663  20 
 -13   1   3 1103.64 398.342  10 
 -13  -1   3 1235.87 476.392  18 
 -13   1   3 1125.82 397.674  26 
 -13  -1  -3 1726.09 423.119  10 
 -13  -1   3 1053.26 418.055  26 
 -13   1  -3 1456.90 533.117  18 
 -13  -1   3 1157.55 389.288  20 
 -13  -1  -3 1425.66 536.684  18 
 -13   1   3 1512.83 473.579  18 
 -13   1  -3 1261.38 374.409  10 
 -13  -1  -4 14341.7 1375.85  27 
 -13   1   4 11854.9 1510.12  26 
 -13   1   4 11822.6 1270.55  20 
 -13  -1   4 12086.3 1403.60  26 
 -13  -1  -4 12770.8 1150.24  10 
 -13   1  -4 14275.7 1280.52  10 
 -13  -1   4 12483.9 1302.63  20 
 -13   1  -4 13772.4 1597.38  18 
  13  -1   4 12781.0 1020.37   9 
 -13  -1  -4 15001.2 1723.57  18 
 -13  -1   4 13283.7 1441.69  18 
 -13   1   4 13590.8 1479.37  18 
 -13  -1   5 898.929 432.767  26 
  13  -1   5 1259.63 337.261   9 
 -13   1  -5 1165.94 465.795  18 
 -13   1   5 1242.86 463.690  20 
 -13   1  -5 1603.94 429.254  10 
 -13   1   5 1258.48 495.347  26 
 -13  -1   5 1245.08 449.581  18 
 -13  -1   5 817.196 347.519  20 
 -13  -1  -5 1251.94 358.079  10 
 -13  -1  -5 1099.32 431.796  18 
 -13   1  -6 331.658 230.579  18 
 -13  -1   6 166.173 192.539  26 
  13  -1   6 383.293 173.147   9 
 -13   1   6 271.293 270.748  26 
 -13   1   6 536.955 356.053  20 
 -13  -1   6 434.366 215.019  18 
 -13   1  -6 415.041 245.509  10 
 -13  -1  -6 455.848 185.822  10 
 -13  -1   6 173.086 225.327  20 
 -13  -1  -6 396.227 194.131  12 
 -13  -1  -6 439.750 208.828  18 
 -13   1   7 424.930 239.336  20 
 -13  -1  -7 657.776 260.862  12 
 -13   1   7 862.528 352.999  26 
 -13   1  -7 1103.00 415.807  18 
 -13  -1   7 537.331 244.860  26 
 -13  -1  -7 933.250 376.542  18 
  13  -1   7 984.581 305.576   9 
 -13  -1   7 841.703 302.666  20 
 -13  -1  -7 1033.50 322.180  10 
 -13   1  -7 785.280 280.240  10 
 -13   1   8 221.511 215.222  26 
 -13  -1   8 346.852 351.737  26 
 -13  -1  -8 112.244 95.0217  12 
  13   1   8 115.977 166.537   9 
 -13  -1  -8-29.8141 43.0976  10 
 -13   1   8 44.5097 142.325  20 
 -13   1  -8-47.3337 119.638  18 
 -13  -1  -8 38.3945 112.960  18 
 -13  -1   8-180.513 178.827  20 
  13  -1   8 178.238 197.457   9 
 -13   1  -8-84.4937 60.7029  10 
  13   1   9 554.178 247.116   9 
 -13  -1   9 363.618 186.129  20 
 -13   1   9 246.817 178.844  26 
 -13   1   9 281.230 233.984  20 
 -13   1  -9 1126.83 409.548  18 
  13  -1   9 614.027 218.716   9 
 -13   1  -9 496.778 239.532  10 
 -13  -1  -9 459.985 190.979  10 
 -13  -1   9 503.607 342.874  26 
 -13  -1  -9 380.145 146.118  12 
 -13  -1  -9 542.517 327.456  18 
 -13  -1 -10 6473.52 963.265  18 
  13  -1  10 6454.34 742.010   9 
 -13   1  10 5128.14 839.806  26 
 -13   1 -10 7068.09 966.549  18 
 -13  -1  10 5053.50 726.689  20 
 -13  -1 -10 6968.89 742.926  10 
  13   1  10 5853.38 718.671   9 
 -13   1  10 5086.17 782.322  20 
 -13  -1 -10 6194.13 763.060  12 
 -13  -1  10 5060.08 791.768  26 
 -13   1 -10 7456.17 901.987  10 
 -13   1  11 125.807 162.972  25 
 -13  -1 -11-271.588 184.977  18 
  13  -1  11-0.34981 125.582   9 
 -13  -1  11 110.294 51.4268  20 
 -13   1  11-180.507 84.2509  26 
 -13   1 -11 14.9934 47.0769  10 
  13   1  11 73.3519 51.7226   9 
 -13  -1  11 22.2011 150.952  26 
 -13   1  11-87.1201 166.091  20 
 -13  -1 -11 167.022 57.4241  12 
 -13   1  11-38.8231 97.8250  24 
 -13  -1 -12 739.142 239.398  12 
 -13  -1  12 331.452 234.003  26 
  13   1  12 629.294 190.591  15 
 -13   1  12 550.714 271.095  24 
 -13   1  12 237.022 143.875  26 
  13   1  12 804.966 256.701   9 
  13  -1  12 718.336 222.176   9 
 -13   1 -12 858.075 259.978  10 
 -13   1  12 575.531 244.433  25 
  13   1  13 457.428 180.930   9 
 -13   1  13 228.268 173.594  25 
 -13  -1  13 536.898 194.284  26 
  13  -1  13 370.140 113.694  15 
  13  -1  13 471.609 203.005   9 
 -13   1  13 413.174 236.716  26 
 -13  -1 -13 531.274 182.244  12 
 -13   1 -13 606.396 192.166  10 
 -13   1  13 353.084 165.325  24 
  13   1  13 382.288 131.297  15 
 -13   1 -14 4143.71 544.125  10 
 -13  -1  14 2070.92 370.866  25 
  13   1  14 3645.01 495.884   9 
 -13   1  14 2306.01 420.915  25 
 -13  -1  14 2386.64 400.151  24 
 -13   1  14 2479.43 441.170  24 
  13  -1  14 3359.74 395.966  15 
  13  -1  14 3399.29 490.904   9 
 -13  -1  14 2625.80 468.168  26 
  13   1  14 3099.89 389.819  15 
 -13   1  14 2609.88 469.406  26 
  13  -1  15 79.9047 40.6010   9 
  13  -1  15 36.0721 58.9041  15 
  13   1  15 63.7307 62.3910  15 
 -13  -1  15 138.495 103.393  26 
  13   1  15 84.0127 110.458   9 
 -13   1  15 46.1538 18.0203  24 
 -13   1 -15 53.0369 69.3784  10 
 -13   1  15 3.88013 71.6730  25 
 -13   1  16 1203.21 278.160  26 
  13   1  16 1775.80 295.330   9 
  13  -1  16 1738.29 305.710   9 
 -13  -1  16 979.443 224.937  26 
 -14  -1   0 3965.74 805.178  26 
 -14   1   0 4055.21 889.654  26 
 -14   1   0 4292.56 860.559  18 
 -14   1   0 3690.96 678.157  10 
 -14  -1   0 3035.53 685.742  20 
 -14  -1   0 4390.77 848.866  18 
 -14   1   0 3597.47 688.033  20 
 -14  -1   0 3329.93 595.873  10 
 -14  -1   1 2282.27 589.667  26 
 -14  -1  -1 2211.79 495.962  10 
 -14   1  -1 2131.07 535.406  10 
 -14   1  -1 2440.65 682.289  18 
 -14   1  -1 2432.17 603.655  20 
 -14   1   1 2116.45 670.027  26 
 -14  -1   1 2299.85 569.314  20 
 -14  -1   1 3250.67 777.390  18 
 -14   1   1 2863.05 705.627  18 
 -14   1  -1 2562.03 703.383  26 
 -14   1   1 2875.16 643.117  20 
 -14   1   1 2225.20 517.772  10 
 -14  -1  -1 3186.00 751.043  18 
 -14  -1  -1 2069.33 527.961  20 
 -14   1   2 13108.9 1475.35  18 
 -14  -1  -2 10296.6 1059.27  10 
 -14  -1   2 11969.0 1324.47  26 
 -14   1   2 10985.6 1447.68  26 
 -14   1   2 12382.2 1334.79  20 
 -14   1  -2 12284.3 1221.83  10 
 -14  -1   2 13383.3 1509.99  18 
 -14   1  -2 14100.4 1589.77  18 
 -14  -1   2 12554.4 1334.45  20 
 -14   1  -2 11214.3 1279.04  20 
 -14   1   2 10825.9 1155.63  10 
 -14  -1  -2 13854.7 1610.87  18 
 -14   1  -3-10.4160 175.026  20 
 -14  -1   3 379.080 276.787  26 
 -14   1   3 263.203 261.338  20 
 -14  -1   3 140.810 152.228  18 
 -14   1   3 84.3153 270.777  26 
 -14   1  -3 154.435 114.805  18 
 -14  -1   3 302.234 164.878  20 
 -14   1  -3 137.450 74.9359  10 
 -14  -1  -3 252.467 216.404  10 
 -14  -1  -3 81.9000 163.425  18 
 -14   1  -4 603.139 290.081  10 
 -14  -1   4 605.320 261.352  20 
 -14  -1  -4 344.636 210.862  10 
 -14   1  -4 875.262 457.529  18 
 -14   1   4 775.873 306.531  20 
 -14  -1  -4 811.633 417.918  18 
 -14   1   4 58.5904 148.541  26 
 -14  -1   4 640.198 269.935  26 
 -14  -1   4 766.794 365.799  18 
 -14  -1   5 3318.21 661.296  20 
  14   1   5 3087.67 534.257   9 
 -14   1  -5 3489.18 625.161  10 
 -14  -1  -5 4145.62 857.907  18 
 -14  -1  -5 3044.59 553.279  10 
 -14   1   5 3213.60 648.430  20 
 -14  -1   5 3280.24 665.329  26 
 -14   1   5 2914.39 740.698  26 
  14  -1   5 3714.60 522.249   9 
 -14   1  -5 4446.20 864.440  18 
 -14  -1   5 3780.47 732.846  18 
 -14  -1   6 399.967 180.382  20 
 -14  -1  -6 594.982 235.820  10 
  14   1   6 589.491 222.428   9 
 -14  -1   6 157.445 134.922  26 
 -14   1  -6 741.709 357.668  18 
  14  -1   6 737.010 227.461   9 
 -14   1   6 675.356 281.685  20 
 -14   1  -6 482.597 247.049  10 
 -14   1   6 746.006 363.986  26 
 -14  -1  -6 566.822 340.406  18 
 -14   1  -7 214.636 176.937  18 
 -14  -1   7-44.7862 152.317  20 
  14  -1   7 110.276 323.814   9 
 -14   1   7 112.267 125.398  20 
 -14  -1  -7 202.864 161.169  10 
  14   1   7 132.940 101.902   9 
 -14   1   7-21.3491 28.3659  26 
 -14   1  -7 22.4781 6.07443  10 
 -14  -1  -7-52.7051 173.160  18 
 -14  -1   7 174.882 192.055  26 
 -14  -1   8 115.435 99.4704  20 
  14  -1   8 157.838 147.007   9 
 -14   1  -8-4.12682 68.7237  10 
 -14  -1   8 348.395 282.937  26 
 -14  -1  -8-44.0197 197.861  18 
 -14   1   8 320.473 187.960  20 
  14   1   8 95.3457 40.9966   9 
 -14   1   8 10.1149 199.739  26 
 -14   1  -8 122.374 170.263  18 
 -14  -1   9 105.293 154.872  26 
 -14   1   9 179.493 212.150  26 
 -14   1   9 25.0880 72.7065  20 
  14  -1   9 183.688 98.3549   9 
  14   1   9 84.0913 90.2615   9 
 -14   1  -9 181.903 130.647  18 
 -14  -1   9 152.223 157.946  20 
 -14  -1  -9-21.4583 176.109  18 
 -14   1  -9 130.802 135.408  10 
 -14  -1  10 3249.08 566.855  26 
 -14  -1  10 3389.14 549.385  20 
 -14   1 -10 5374.89 658.956  10 
 -14   1  10 3807.49 625.246  20 
 -14   1  10 3500.43 653.787  26 
  14  -1  10 4678.29 582.626   9 
 -14  -1 -10 5281.83 793.307  18 
  14   1  10 4764.67 599.576   9 
 -14  -1 -11 214.861 167.127  18 
  14   1  11-44.5716 60.5470   9 
 -14  -1  11 238.683 144.910  20 
 -14  -1  11-206.015 123.380  26 
  14  -1  11-36.4103 101.117   9 
 -14   1  11-57.8670 87.5218  26 
 -14   1  11-29.0144 130.789  20 
 -14   1 -11 48.7022 70.8198  10 
  14  -1  12 4483.01 551.885   9 
 -14   1  12 3363.61 613.400  26 
  14   1  12 4561.69 550.317   9 
 -14   1 -12 4803.45 554.074  10 
 -14  -1  12 3212.67 546.949  26 
 -14   1  13 369.312 184.491  26 
  14   1  13 186.683 85.9692   9 
  14  -1  13 295.923 136.825   9 
 -14   1 -13 182.408 69.2781  10 
 -14  -1  13 14.4787 68.7961  26 
  14  -1  14 828.719 208.267   9 
  14   1  14 640.573 164.829   9 
 -14   1  14 696.998 262.619  26 
 -14  -1  14 346.618 109.473  26 
  14   1  15 974.286 207.385   9 
 -15   1   0 61.6136 154.940  20 
 -15  -1   0 15.4415 30.7749  18 
 -15   1   0 491.057 339.801  26 
 -15  -1   0 85.5418 138.194  20 
 -15   1   0 340.871 220.073  10 
 -15   1   0-107.588 80.2520  18 
 -15   1   1 428.435 388.697  26 
 -15   1  -1 178.888 187.348  20 
 -15  -1   1 92.3307 75.2439  18 
 -15   1   1 472.499 284.439  20 
 -15   1  -1 44.2730 112.744  18 
 -15   1  -1-142.534 145.967  26 
 -15   1  -1 18.3361 53.9277  10 
 -15  -1  -1 73.9959 65.4531  18 
 -15  -1  -1 273.182 154.008  20 
 -15  -1   1-119.027 55.1234  20 
 -15  -1  -2 200.850 154.145  20 
 -15   1  -2 304.148 209.452  10 
 -15   1   2 392.350 314.754  26 
 -15   1  -2 698.176 359.927  18 
 -15  -1  -2 525.458 271.888  18 
 -15   1   2 731.086 315.107  20 
 -15   1  -2 425.056 281.329  20 
 -15  -1   2 442.094 219.759  20 
 -15  -1   2 843.384 390.981  18 
 -15   1  -2 334.985 301.141  26 
 -15  -1   3 1619.01 498.436  18 
 -15  -1  -3 782.842 271.300  10 
 -15   1  -3 1455.69 463.037  18 
 -15   1   3 1194.16 523.771  26 
 -15   1  -3 1465.79 504.750  20 
 -15  -1  -3 1137.78 409.860  20 
 -15   1  -3 1223.82 481.377  26 
 -15  -1   3 1414.35 429.622  20 
 -15   1   3 1360.56 390.429  20 
 -15  -1  -3 1576.55 492.748  18 
 -15  -1   3 763.606 338.936  26 
 -15   1  -3 1135.70 365.047  10 
 -15   1  -4 6912.51 969.306  20 
 -15   1  -4 9364.74 1206.86  18 
 -15  -1   4 6806.29 924.265  26 
 -15  -1   4 8947.67 1111.29  18 
 -15   1  -4 7692.85 1104.10  26 
 -15   1   4 7030.41 1050.76  26 
 -15  -1  -4 6179.77 765.363  10 
 -15   1  -4 7653.65 908.153  10 
 -15  -1  -4 9576.69 1252.10  18 
 -15  -1   4 7461.04 959.671  20 
 -15   1   4 8296.55 1024.46  20 
 -15   1  -5 3055.64 563.029  10 
 -15  -1   5 2292.73 488.765  26 
  15   1   5 2505.73 439.292   9 
 -15  -1   5 2743.87 567.326  20 
 -15   1  -5 3837.85 766.022  18 
 -15   1  -5 2932.55 647.886  20 
 -15  -1  -5 3309.82 666.554  18 
 -15   1  -5 2822.23 709.990  26 
 -15   1   5 3164.63 619.204  20 
 -15   1   5 3054.89 689.042  26 
 -15   1  -6 5856.87 866.422  20 
 -15   1  -6 6856.05 800.583  10 
  15   1   6 6020.34 675.453   9 
 -15  -1  -6 6967.43 1015.27  18 
 -15   1   6 5985.59 891.322  26 
 -15  -1   6 5592.14 799.255  26 
 -15   1  -6 7706.65 1071.60  18 
 -15  -1   6 6117.02 844.880  20 
 -15   1   6 5832.96 816.465  20 
 -15  -1  -7 86.3894 56.5675  18 
 -15   1   7 37.3044 130.842  26 
  15   1   7-33.6738 105.848   9 
 -15  -1   7 6.96850 111.106  26 
  15  -1   7 33.9500 89.5089   9 
 -15   1   7 172.046 139.599  20 
 -15   1  -7-92.1306 88.2248  10 
 -15  -1   7-24.5196 115.577  20 
 -15  -1  -8 1146.37 351.008  18 
 -15  -1   8 914.727 315.073  20 
 -15   1   8 721.392 288.866  26 
 -15   1   8 767.445 326.652  20 
  15   1   8 915.977 256.770   9 
 -15  -1   8 743.083 339.622  26 
  15  -1   8 1179.86 290.278   9 
 -15   1  -8 850.188 271.822  10 
 -15   1   9 1790.23 464.165  26 
 -15  -1   9 1580.53 382.447  26 
 -15   1  -9 2350.75 421.816  10 
  15   1   9 1975.87 368.566   9 
  15  -1   9 2530.67 392.275   9 
 -15  -1   9 1682.94 385.738  20 
 -15   1   9 1959.72 402.912  20 
 -15  -1  -9 3032.05 588.705  18 
 -15  -1 -10 203.963 103.465  18 
 -15   1 -10-23.7338 68.9083  10 
  15   1  10 169.497 81.3995   9 
 -15   1  10 154.256 130.738  26 
  15  -1  10 107.884 87.7390   9 
 -15  -1  10 76.7511 34.9565  26 
 -15  -1  10 96.0141 127.588  20 
 -15   1  10 67.1495 112.731  20 
  15   1  11 630.236 204.473   9 
 -15  -1  11 171.807 63.4395  26 
 -15   1 -11 569.733 179.186  10 
 -15   1  11 188.156 54.2159  26 
  15  -1  11 733.378 202.032   9 
  15   1  12 243.544 92.3111   9 
 -15   1  12 360.004 123.012  26 
  15  -1  12 304.337 125.777   9 
 -15   1 -12 36.3386 86.0564  20 
  15   1  13-67.9108 82.3044   9 
 -16  -1   0 1260.80 373.795  18 
 -16  -1   0 1083.69 393.996  20 
 -16   1   0 1085.36 370.054  26 
 -16   1   0 1000.65 307.210  20 
 -16  -1  -1 3457.45 697.773  20 
 -16   1  -1 3250.23 614.771  20 
 -16   1  -1 2902.08 645.957  26 
 -16  -1  -1 3353.56 685.227  18 
 -16  -1   1 3140.98 602.879  20 
 -16   1   1 3210.22 615.150  20 
 -16  -1   1 3489.41 706.827  18 
 -16   1   1 2886.95 632.218  26 
 -16  -1  -2 9044.26 1065.41  20 
 -16   1   2 9489.74 1048.39  20 
 -16  -1   2 9568.48 1056.44  20 
 -16  -1  -2 10862.1 1282.10  18 
 -16   1  -2 7686.57 883.183  10 
 -16   1  -2 8765.20 1104.59  26 
 -16   1  -2 10027.9 1101.71  20 
 -16   1   2 8790.50 1068.72  26 
 -16   1  -3 571.294 251.103  20 
 -16  -1  -3 579.733 323.926  18 
 -16   1   3 218.303 148.552  20 
 -16   1  -3 642.027 361.305  26 
 -16  -1   3 386.257 206.911  20 
 -16   1  -3 364.343 186.675  10 
 -16  -1  -3 682.277 229.660  20 
 -16   1   3 359.244 98.4625  26 
 -16   1   4 260.440 226.422  26 
 -16  -1  -4 0.99194 68.9378  20 
 -16   1  -4 95.3522 83.5796  10 
 -16  -1   4-12.7710 73.6588  20 
 -16   1  -4 170.190 119.014  20 
 -16  -1  -4 106.188 224.110  18 
 -16   1   4-81.7756 159.539  20 
 -16  -1   5 97.7204 48.6765  20 
 -16   1  -5 188.492 153.244  10 
 -16  -1  -5-33.9958 100.065  20 
 -16   1   5-121.959 209.180  20 
 -16   1  -5-39.2438 128.587  20 
 -16  -1  -5-204.164 163.786  18 
 -16   1   5 81.1480 85.0202  26 
 -16  -1  -6 72.7797 90.8774  18 
 -16   1  -6-9.84307 69.7502  10 
 -16   1   6 70.0105 41.0452  26 
 -16   1  -6 6.22833 74.3939  20 
 -16  -1   6 189.307 153.879  20 
 -16   1   6 334.899 217.521  20 
 -16  -1  -6-63.3428 161.163  20 
 -16  -1  -7 463.197 187.615  18 
 -16   1  -7 273.137 152.642  10 
 -16  -1  -7 427.985 164.832  20 
 -16   1  -7 595.648 261.530  20 
 -16   1   7 227.513 147.233  26 
 -16  -1   7 585.973 191.835  20 
 -16   1   7 371.285 125.638  20 
 -16  -1  -8 514.250 241.838  18 
 -16   1  -8 262.781 114.602  10 
  16   1   8 589.146 189.462   9 
 -16   1  -8 211.354 78.9813  20 
 -16   1   8 227.544 92.0650  20 
 -16   1   8 207.552 120.680  26 
 -16  -1  -8 505.080 238.798  20 
 -16  -1   8 177.729 98.0421  20 
 -16   1  -9 5040.15 672.073  20 
 -16   1   9 3649.27 518.313  20 
  16   1   9 4843.02 506.579   9 
 -16   1   9 3799.78 541.063  26 
 -16  -1  -9 4546.73 662.918  20 
 -16   1  10 874.237 262.568  26 
 -16  -1 -10 1573.47 381.104  20 
 -16   1 -10 1723.85 344.626  20 
 -16  -1 -11 218.996 127.909  20 
 -17   1   0 155.042 134.918  20 
 -17  -1   0 298.194 197.883  20 
 -17   1  -1 141.331 69.3745  20 
 -17  -1  -1 309.791 171.177  20 
 -17   1   1 451.922 224.986  20 
 -17  -1   1 733.599 285.558  20 
 -17   1  -2 335.542 212.953  20 
 -17   1   2 111.449 106.061  20 
 -17   1   2 109.042 134.611  26 
 -17  -1  -2 33.5123 129.135  20 
 -17  -1   2-211.845 218.485  20 
 -17   1  -3 210.705 170.500  20 
 -17   1   3 210.561 165.801  20 
 -17  -1  -3 32.7654 65.4250  20 
 -17  -1   3-154.422 93.9116  20 
 -17   1   3 35.1794 69.7292  26 
 -17   1   4 1260.03 337.273  26 
 -17   1  -4 2008.95 445.591  20 
 -17  -1  -4 1599.46 386.991  20 
 -17  -1   4 1360.94 315.397  20 
 -17   1   4 1743.72 404.163  20 
 -17  -1   5 784.179 235.131  20 
 -17  -1  -5 175.412 96.1473  20 
 -17   1   5 470.619 202.490  20 
 -17   1  -5 955.559 301.259  20 
 -17   1   5 250.002 136.952  26 
 -17   1   6 762.004 268.068  20 
 -17  -1  -6 1026.84 303.939  20 
 -17   1  -6 1297.93 313.686  20 
 -17  -1   6 445.954 178.048  20 
 -17   1   7 206.967 104.279  20 
 -17  -1  -7 501.964 205.809  20 
 -17   1  -7 405.791 170.229  20 
 -17  -1  -8 446.588 159.082  20 
 -18  -1   0 9854.30 808.227  20 
 -18   1   0 10041.1 829.183  20 
 -18   1  -1 1874.71 363.259  20 
 -18  -1  -1 1724.94 321.211  20 
 -18   1   1 1675.18 334.515  20 
 -18  -1  -2 167.452 99.8439  20 
 -18   1  -2 497.689 189.142  20 
 -18   1   2 288.548 131.823  20 
   0   2   0 255256. 6210.10   1 
   0  -2   0 247349. 6214.21   1 
   0   2   1 205475. 3710.94   2 
   0  -2  -1 230120. 6771.01   1 
   0   2   1 239227. 6724.48   1 
   0   2   1 208847. 3797.13   3 
   0  -2  -1 220190. 5177.20   5 
   0  -2   1 221869. 4156.71   1 
   0  -2  -2 131138. 4218.54   5 
   0   2   2 135444. 3237.20   2 
   0   2   2 137363. 4216.42   5 
   0  -2  -2 147227. 6433.86   1 
   0   2  -2 138746. 3513.28   1 
   0   2   2 144147. 5950.18   1 
   0   2   2 137979. 3310.23   3 
   0  -2   2 133135. 3562.94   1 
   0  -2  -3 101.716 97.1902   3 
   0  -2  -3-302.703 543.653   1 
   0  -2  -3 88.6185 145.112   2 
   0   2  -3-62.7714 78.4621   1 
   0   2   3 47.6184 130.142   5 
   0  -2   3 54.8823 137.948   1 
   0   2   3 164.192 83.2924   1 
   0   2   4 127002. 7485.90   1 
   0   2  -4 152046. 4635.33   1 
   0  -2  -4 157104. 5181.91   2 
   0  -2  -4 148554. 5162.08   3 
   0  -2   4 128248. 5422.27   1 
   0  -2  -4 157370. 7835.94   4 
   0  -2   4 157051. 7158.72   4 
   0   2   4 151326. 4995.47   5 
   0  -2  -4 163090. 9399.71   1 
   0  -2  -5 127.440 44.6296   3 
   0   2   5 123.221 188.598   5 
   0  -2   5 110.041 96.8060   4 
   0  -2  -5 179.523 264.085   2 
   0   2   5 86.0078 470.123   1 
   0  -2   5 50.9661 199.078   1 
   0  -2  -5 281.527 320.963   4 
   0   2  -5 234.981 239.005   1 
   0  -2  -5 117.823 599.626   1 
   0  -2  -6 39157.0 3282.01   2 
   0  -2  -6 39049.3 3337.64   3 
   0   2  -6 41728.7 3082.25   1 
   0  -2   6 35015.2 3316.62   4 
   0   2   6 38563.9 2959.07   5 
   0  -2  -6 26160.1 5256.62   1 
   0  -2  -6 38683.0 4614.45   4 
   0  -2   6 30585.4 3516.07   1 
   0   2  -7 91073.0 5015.44   1 
   0   2   7 84467.0 4611.13   5 
   0  -2   7 87717.5 5441.33   4 
   0  -2  -7 87061.7 7442.27   4 
   0  -2  -7 76122.9 8085.45   1 
   0  -2  -8 5542.56 2169.87   4 
   0   2  -8 7464.83 1524.63   1 
   0   2   8 6551.99 1412.01   5 
   0  -2  -8 5720.51 2462.60   1 
   0  -2   8 7442.34 1575.84   4 
   0   2  -9 1835.59 786.994   1 
   0  -2  -9 1715.51 1381.49   1 
   0   2   9 1339.39 611.634   5 
   0  -2  -9 1383.68 1070.23   4 
   0  -2 -10 1009.56 486.731  12 
   0  -2 -10 1466.87 1329.87   1 
   0  -2  10 1101.96 275.007  25 
   0  -2  10 1310.83 283.368  26 
   0  -2  10 977.975 249.084  24 
   0   2  10 970.507 218.886  14 
   0  -2  10 1201.71 280.498  17 
   0   2  10 959.761 319.537  17 
   0  -2 -10 1100.57 1236.83   4 
   0  -2  10 1062.48 228.433   6 
   0  -2 -10 976.208 238.213   7 
   0   2 -10 1315.64 657.527   1 
   0  -2  10 967.180 211.679  14 
   0  -2  10 815.720 283.748  16 
   0  -2  11 21219.4 1063.94  15 
   0  -2  11 21726.6 1545.08  16 
   0   2 -11 20986.4 3256.88   1 
   0  -2  11 23112.8 1354.11  17 
   0  -2 -11 21832.6 1261.70   7 
   0  -2  11 21098.9 1070.11  14 
   0  -2  11 20320.4 1092.63   9 
   0  -2  11 26460.6 1322.89  26 
   0  -2  11 21783.8 1362.61  25 
   0   2  11 22118.4 1130.93  14 
   0   2  11 20415.1 1400.90  24 
   0  -2  11 21466.2 1359.53  24 
   0   2  11 23441.9 1212.62  26 
   0  -2 -11 22512.5 2045.39  12 
   0  -2 -11 14482.4 4786.46   4 
   0   2  11 24529.0 1194.86   6 
   0   2  11 24163.5 1407.33  17 
   0  -2  11 22238.1 1100.96   6 
   0  -2 -11 17736.2 4132.59   1 
   0   2  11 20849.1 1406.66  25 
   0  -2 -12 10585.6 4436.32   4 
   0  -2  12 17454.0 1239.29  17 
   0   2  12 18604.4 1108.03  26 
   0   2 -12 16089.0 2914.56   1 
   0   2  12 17844.6 1286.00  17 
   0  -2  12 16025.7 1001.17  15 
   0  -2  12 16477.2 1003.98  14 
   0   2  12 16056.7 1308.24  25 
   0  -2  12 17255.2 1256.95  25 
   0  -2  12 17243.0 1257.86  24 
   0  -2  12 16304.1 1035.54   9 
   0   2  12 17516.8 1046.59  14 
   0  -2  12 20782.9 1242.28  26 
   0  -2  12 16843.3 1435.67  16 
   0  -2 -12 16128.7 1826.65  12 
   0  -2 -12 12802.2 3577.62   1 
   0   2  12 15355.2 1281.89  24 
   0  -2  12 18198.7 1044.96   6 
   0   2  12 18414.1 1093.73   6 
   0  -2 -12 18530.2 1190.35   7 
   0  -2  13 29409.2 1964.91  16 
   0  -2  13 33184.1 1689.32  26 
   0  -2  13 25734.7 1418.96   9 
   0  -2  13 27523.0 1377.94  15 
   0   2  13 29125.0 1432.19  14 
   0  -2  13 29123.6 1409.55  14 
   0   2  13 28765.5 1786.32  24 
   0   2  13 28617.2 1792.31  25 
   0  -2  13 29305.3 1696.51  24 
   0  -2  13 29227.8 1685.88  25 
   0   2  13 33703.0 1562.37  26 
   0  -2  13 29089.2 1715.98  17 
   0   2 -13 26073.4 4129.75   1 
   0  -2 -13 21367.4 4904.41   1 
   0  -2 -13 14436.8 5291.82   4 
   0   2  13 30679.9 1754.95  17 
   0  -2 -13 24716.8 2307.85  12 
   0  -2  13 30329.8 1441.80   6 
   0   2  13 31700.9 1501.12   6 
   0  -2 -13 32103.1 1620.42   7 
   0   2  14 4939.80 751.368  24 
   0  -2  14 4723.79 829.576  16 
   0   2  14 5639.40 647.689  14 
   0   2  14 5325.84 650.862   6 
   0  -2  14 5540.95 611.396  15 
   0   2  14 5213.94 643.493  26 
   0  -2 -14 4323.18 1001.83  12 
   0  -2  14 5154.58 742.799  24 
   0  -2  14 5737.79 655.620   6 
   0  -2  14 5110.77 622.674  14 
   0  -2  14 4370.93 614.101   9 
   0  -2 -14 2641.93 1914.56   1 
   0  -2  14 5417.68 755.206  25 
   0   2  14 5420.92 758.522  17 
   0   2 -14 4736.27 1725.22   1 
   0   2  14 5132.33 763.562  25 
   0  -2  14 5215.99 785.463  17 
   0   2  15 839.425 367.597  16 
   0  -2  15 646.750 240.814  25 
   0   2  15 646.788 293.012  17 
   0   2  15 739.654 320.554  25 
   0  -2  15 783.000 237.589  15 
   0  -2  15 763.338 291.937  24 
   0   2  15 727.451 258.004  24 
   0  -2  15 751.667 250.546   6 
   0  -2  15 627.125 291.387  16 
   0  -2 -15 358.894 214.195  12 
   0   2  15 868.213 259.655  26 
   0  -2  15 665.655 259.585  14 
   0   2  15 634.300 234.805  14 
   0   2  15 731.940 259.183   6 
   0  -2  15 806.133 281.605  17 
   0   2  16 9284.69 1258.98  16 
   0   2  16 9587.13 884.536  14 
   0  -2  16 8746.46 999.866  25 
   0  -2  16 9009.38 1006.74  24 
   0   2  16 8869.60 1015.98  25 
   0  -2  16 8909.69 1037.50  17 
   0   2  16 8894.82 1021.76  24 
   0  -2  16 9074.31 848.805  15 
   0   2  16 8476.33 1032.00  17 
   0  -2  16 8881.28 896.864  14 
   0  -2 -16 7355.15 1256.63  12 
   0  -2  16 8228.60 1124.25  16 
   0   2  16 9332.05 900.345   6 
   0  -2  17 31242.5 1850.09  25 
   0   2  17 33855.5 1735.81  14 
   0  -2  17 36019.3 2089.02  17 
   0   2  17 36422.5 1779.08   6 
   0   2  17 31654.4 1895.67  25 
   0   2  17 31827.7 1902.80  24 
   0  -2  17 34098.7 1640.53  15 
   0  -2  17 36417.5 1810.39  14 
   0  -2  17 29021.1 2158.30  16 
   0  -2  17 31038.0 1852.58  24 
   0  -2 -17 24750.9 2325.70  12 
   0   2  17 34022.8 2020.24  17 
   0   2  17 32086.8 2384.48  16 
   0  -2  18 326.937 174.043  25 
   0   2  18 587.807 315.755  17 
   0   2  18 330.811 171.875   6 
   0   2  18 90.4476 176.106  16 
   0   2  18 411.796 231.107  14 
   0  -2  18 595.940 258.429  17 
   0  -2  18 297.730 180.418  24 
   0  -2  18 244.830 216.564  16 
   0  -2  18 89.6133 112.488  21 
   0  -2  18 291.074 139.427  14 
   0  -2  18 353.547 128.817  15 
   0  -2 -18 235.179 216.523  12 
   0   2  19 10000.8 1079.82  17 
   0  -2  19 12169.3 1045.15  14 
   0  -2  19 9427.45 944.497  25 
   0  -2  19 9373.04 1216.60  16 
   0   2  19 11756.8 1005.70  14 
   0  -2  19 11014.9 1313.81  21 
   0   2  19 12165.2 993.251   6 
   0   2  19 9769.70 1319.53  16 
   0  -2  19 11307.7 1162.15  17 
   0  -2  19 9572.93 955.999  24 
   0  -2  20 1974.02 511.884  16 
   0   2  20 1759.51 522.490  16 
   0  -2  20 2823.00 539.265  17 
   0   2  20 2960.93 464.479  14 
   0   2  20 2434.19 503.102  17 
   0  -2  20 2445.19 573.652  21 
   0  -2 -20 924.270 381.642  12 
   0  -2  20 2470.18 436.612  14 
   0   2  20 2917.45 473.770   6 
   0   2 -20 1722.62 547.266  10 
   0  -2 -21-93.1261 153.601  10 
   0  -2  21 132.085 111.916  21 
   0   2  21 281.088 223.557  17 
   0   2  21-2.76780 63.9503  14 
   0   2 -21-35.7545 35.8047  10 
   0   2  21 237.136 133.723   6 
   0   2  21 58.4179 152.376  16 
   0  -2  21 13.6116 83.3334  16 
   0  -2  21-5.29159 78.7110  14 
   0   2  22 2300.01 412.324  17 
   0  -2  22 2728.28 520.463  21 
   0   2  22 2703.64 524.384  21 
   0  -2 -22 1105.38 336.636  10 
   0   2  22 1885.85 440.071  16 
   0   2  22 2884.50 421.534  14 
   0  -2  22 1960.38 430.434  16 
   0   2 -22 1662.48 421.968  10 
   0  -2  22 2323.87 415.586  14 
   0   2  23 2425.60 427.392  16 
   0   2 -23 2096.46 433.425  10 
   0  -2  23 2629.83 451.841  16 
   0   2  23 4014.65 444.989  14 
   0   2  23 3164.25 504.742  21 
   0  -2  23 3376.63 519.819  21 
   0  -2  23 2746.63 412.368  14 
  -1  -2   0 137.672 222.358   1 
  -1  -2   0 147.893 198.415   5 
   1  -2   0 8.31017 134.056   1 
   1  -2   0 43.2344 34.6008   1 
   1   2   0 93.3012 100.722   5 
   1   2   0 6.95399 128.434   1 
  -1   2  -1 88895.5 2901.27   1 
  -1   2   1 95225.5 4293.92   1 
  -1  -2   1 92303.7 3254.87   1 
   1  -2  -1 100846. 4480.10   1 
   1   2   1 102222. 4410.58   1 
   1   2   1 93679.8 3984.42   5 
  -1  -2   1 92574.3 3819.27   5 
   1  -2   1 91767.1 3001.57   1 
  -1  -2  -1 79617.2 3638.04   5 
  -1  -2   1 91740.7 2338.14   1 
  -1  -2  -1 100191. 4753.69   1 
  -1  -2   2 1841.41 380.636   1 
  -1   2   2 1945.89 520.258   3 
   1  -2  -2 2300.68 463.379   5 
  -1  -2  -2 3332.56 1081.43   4 
  -1  -2  -2 2541.80 912.849   1 
   1   2   2 2686.16 701.388   5 
   1  -2  -2 2446.24 782.281   1 
   1   2   2 2283.53 743.910   1 
   1   2  -2 2190.74 387.868   1 
  -1  -2  -2 2172.53 312.976   2 
  -1  -2  -2 2027.25 591.712   5 
  -1   2   2 2000.76 726.440   1 
  -1   2   2 2250.68 570.218   2 
  -1  -2  -2 2102.86 324.178   3 
   1  -2   2 2035.10 489.222   1 
  -1   2  -2 2573.59 518.826   1 
   1  -2   3 9241.79 1221.01   1 
   1  -2  -3 8716.36 1283.66   2 
  -1   2   3 9069.71 1199.38   3 
  -1  -2  -3 11205.7 981.382   2 
  -1   2  -3 9110.14 1109.62   1 
  -1  -2  -3 9674.97 934.939   3 
  -1   2   3 7971.10 1103.90   2 
   1  -2  -3 9083.45 1810.33   1 
   1  -2  -3 8029.53 919.926   5 
  -1   2   3 8948.88 1645.62   1 
  -1  -2  -3 8975.30 2132.17   1 
   1   2   3 9437.42 1921.02   1 
  -1  -2  -3 7492.36 1663.81   4 
   1  -2  -3 8710.62 1328.99   3 
   1   2   3 8714.30 1335.41   5 
   1   2  -3 8371.36 866.573   1 
  -1  -2   3 8099.54 995.283   1 
   1   2   4 1300.71 833.486   1 
   1   2  -4 1408.67 403.837   1 
  -1   2  -4 1408.97 514.720   1 
   1   2   4 1583.45 651.279   5 
   1  -2  -4 1237.68 522.389   2 
  -1  -2  -4 1690.37 499.271   3 
  -1   2   4 1262.53 770.628   1 
   1  -2   4 1194.26 532.079   1 
  -1  -2  -4 1898.02 1046.42   1 
  -1  -2  -4 1359.98 852.295   4 
   1  -2  -4 1618.20 990.609   1 
   1  -2   4 1855.78 949.073   4 
   1  -2  -4 936.767 479.204   3 
  -1  -2   4 1164.58 444.363   1 
  -1  -2   4 466.100 216.255   4 
  -1  -2  -4 1572.67 479.829   2 
  -1   2   5 90.5622 285.736   1 
   1  -2  -5 180.882 324.697   3 
   1  -2   5 339.580 241.899   1 
  -1  -2   5 177.833 133.564   4 
  -1   2  -5 317.170 309.414   1 
  -1  -2  -5 660.564 768.888   1 
  -1   2   5 35.7994 88.9767   5 
  -1  -2   5 111.688 190.785   1 
   1   2   5 180.756 230.996   5 
   1   2  -5 187.895 108.007   1 
   1  -2  -5 181.442 476.626   1 
  -1  -2  -5 108.786 124.580   3 
  -1  -2  -5 291.845 825.108   4 
   1  -2  -5 240.296 250.917   2 
   1  -2   5-83.9344 289.136   4 
  -1  -2  -5 351.101 310.337   2 
   1   2   6 2261.30 817.087   5 
  -1  -2  -6 2798.15 850.633   3 
  -1   2   6 2756.75 607.929   5 
   1  -2   6 1858.60 1077.26   4 
  -1  -2   6 2001.36 977.467   1 
   1  -2  -6 2358.85 1406.25   1 
   1  -2  -6 1605.25 767.729   3 
  -1  -2  -6 1569.25 1324.69   1 
   1   2  -6 2347.81 700.716   1 
  -1  -2  -6 2189.77 1508.07   4 
  -1   2  -6 2833.54 793.620   1 
  -1  -2  -6 2586.42 762.675   2 
   1  -2  -6 2097.33 880.556   2 
   1  -2  -6 2776.96 1243.24   4 
  -1  -2  -7 3797.15 1749.96   1 
   1   2   7 3817.52 1114.76   5 
   1   2  -7 4351.73 1011.99   1 
   1  -2  -7 3954.01 1519.78   4 
  -1  -2  -7 3333.94 1837.69   4 
  -1   2   7 4657.02 814.484   5 
  -1   2  -7 5186.07 1197.49   1 
   1  -2  -7 2382.95 1730.49   1 
   1  -2   7 4293.28 1494.10   4 
  -1   2   8 57578.9 2956.44   5 
  -1  -2  -8 57713.6 7614.23   4 
   1  -2  -8 41169.6 6310.22   1 
   1   2  -8 56740.8 4007.67   1 
   1  -2  -8 55174.7 6152.08   4 
   1  -2   8 51001.8 5189.56   4 
  -1  -2  -8 57733.5 6864.38   1 
  -1   2  -8 60385.9 4602.14   1 
  -1   2   9 72881.7 3513.33   5 
   1   2  -9 84238.7 5382.36   1 
  -1  -2  -9 69353.4 7787.03   1 
  -1   2  -9 88121.5 6009.35   1 
  -1  -2  -9 83790.4 10577.9   4 
   1  -2  -9 66384.2 7350.59   4 
   1  -2  -9 65931.0 8240.43   1 
  -1  -2 -10 8013.52 3665.34   4 
  -1   2  10 9560.36 980.016  24 
  -1   2  10 10436.3 932.430  17 
  -1   2  10 9268.70 961.842  25 
  -1   2  10 9802.52 734.706  14 
  -1  -2  10 10398.8 702.564   6 
   1   2  10 11506.6 777.413   6 
   1  -2  10 9830.49 684.065  14 
   1  -2  10 10329.6 706.089   6 
   1  -2  10 12572.8 869.008  26 
  -1  -2 -10 9660.02 824.233   7 
  -1  -2  10 10029.3 917.853  24 
   1  -2  10 10693.3 886.952  17 
  -1   2  10 10667.3 755.384   8 
   1  -2 -10 6367.49 2628.11   1 
  -1  -2 -10 11095.4 1397.05  12 
   1  -2 -10 5373.37 2233.43   4 
  -1  -2 -10 7833.78 2653.38   1 
   1   2  10 8949.94 722.522  14 
  -1  -2  10 11642.5 900.334  17 
   1   2 -10 9860.09 1959.19   1 
  -1  -2  10 9800.40 689.061  14 
   1  -2  10 10388.3 1000.44  16 
  -1   2 -10 10465.9 2162.86   1 
  -1  -2  10 10483.9 938.204  25 
  -1  -2  10 10800.6 850.950  26 
   1  -2  10 10031.4 733.083   9 
   1   2  10 12423.8 938.087  17 
  -1  -2  10 10099.2 1022.60  16 
  -1   2  11 30931.4 1632.26  17 
  -1   2  11 31847.4 1445.74  26 
   1   2 -11 27699.6 3648.95   1 
   1  -2  11 28882.2 1257.70  14 
   1   2  11 28796.9 1321.05  14 
  -1  -2  11 31724.6 1866.41  16 
  -1  -2 -11 29088.4 1491.59   7 
   1   2  11 33669.1 1402.68   6 
   1  -2  11 30220.7 1518.95  24 
  -1  -2  11 30052.3 1284.58  14 
   1  -2  11 31890.0 1315.74   6 
   1  -2 -11 15887.7 4585.24   4 
   1  -2 -11 19419.2 4729.58   1 
  -1   2 -11 30687.7 3899.46   1 
   1  -2  11 31234.4 1826.69  16 
  -1  -2 -11 29509.9 2306.53  12 
  -1   2  11 28777.7 1758.45  24 
   1  -2  11 29952.1 1515.62  25 
  -1  -2  11 26789.7 1251.93   9 
   1  -2  11 28660.3 1337.01   9 
   1  -2  11 32350.2 1587.98  17 
  -1   2  11 28631.8 1764.14  25 
   1   2  11 33597.1 1372.12  26 
  -1  -2  11 30638.3 1683.09  25 
  -1  -2 -11 19507.8 5688.00   4 
   1   2  11 33640.7 1621.59  17 
   1  -2 -11 26124.3 2266.84  12 
  -1  -2 -11 27885.5 1727.67  23 
  -1   2  11 30827.5 1327.62  14 
  -1  -2  11 30798.7 1692.59  24 
  -1  -2  11 27306.2 1179.43  15 
  -1  -2 -11 26214.8 4976.32   1 
  -1  -2  11 32914.6 1570.93  26 
  -1   2  11 32747.4 1381.26   6 
   1  -2 -11 31101.2 1486.04   7 
  -1  -2  11 28987.7 1542.59  17 
  -1  -2  11 31185.5 1293.09   6 
   1   2  12 11385.1 884.783   6 
  -1  -2  12 10382.5 1019.62  17 
   1  -2  12 11114.7 1016.98  17 
   1   2 -12 8880.95 2072.41   1 
   1  -2  12 10981.9 964.150  25 
  -1  -2  12 12294.8 1017.50  26 
  -1   2 -12 10919.8 2500.27   1 
  -1  -2  12 11459.9 1193.68  16 
   1   2  12 9888.94 954.128  25 
  -1   2  12 10492.5 1086.85  24 
   1  -2  12 11101.9 974.925  24 
  -1  -2 -12 12397.1 989.561   7 
   1  -2 -12 4456.59 2716.55   4 
  -1  -2  12 10414.9 807.966  14 
  -1  -2 -12 10992.3 1063.44  23 
  -1  -2 -12 8572.11 2995.60   1 
  -1   2  12 10847.8 834.181  14 
  -1   2  12 11052.8 1025.34  17 
   1  -2 -12 7281.39 2812.80   1 
  -1  -2  12 11097.0 1055.67  24 
   1  -2  12 11031.1 1146.06  16 
  -1   2  12 12113.6 937.017  26 
   1   2  12 10050.2 969.596  24 
   1   2  12 12364.7 1032.85  17 
   1  -2 -12 10737.0 1527.01  12 
   1   2  12 12232.4 875.135  26 
   1  -2 -12 8781.86 895.345   7 
  -1  -2  12 10026.7 755.322  15 
  -1  -2  12 10904.8 1044.04  25 
   1  -2  12 11217.4 814.931  14 
  -1  -2 -12 9927.64 1394.19  12 
   1  -2  12 10725.4 877.951   9 
   1   2  12 11150.5 851.261  14 
   1  -2  12 11484.4 843.356   6 
  -1   2  12 12157.1 894.867   6 
  -1   2  12 10756.2 1102.72  25 
  -1  -2 -12 7758.31 4115.88   4 
  -1  -2  12 11615.9 841.108   6 
  -1   2  13 2881.36 526.762  17 
   1  -2  13 2728.98 419.192   6 
  -1  -2  13 2903.36 501.774  26 
  -1   2  13 2020.86 462.708  25 
  -1  -2  13 2242.67 388.463  15 
  -1  -2  13 2605.42 529.143  17 
  -1   2  13 2606.29 425.183  14 
   1  -2 -13 2386.12 442.454   7 
  -1  -2  13 2519.27 589.671  16 
   1  -2  13 2584.78 482.054  25 
   1   2  13 2585.63 415.424  14 
  -1   2  13 2425.91 428.468  26 
  -1  -2 -13 2473.60 747.111  12 
  -1   2  13 2906.39 453.079   6 
   1   2  13 2187.69 457.813  24 
  -1  -2  13 2565.01 542.855  25 
   1  -2  13 2520.51 466.146  24 
  -1   2  13 2411.60 524.861  24 
   1   2  13 2918.31 521.618  17 
  -1  -2 -13 1990.28 1340.18   1 
   1  -2 -13 1227.67 1221.05   1 
  -1  -2  13 2550.42 413.241  14 
   1  -2  13 2662.14 611.143  16 
   1  -2  13 2002.64 386.048   9 
  -1  -2  13 2607.06 443.564   6 
   1  -2  13 2538.53 411.044  14 
  -1   2 -13 2384.93 1187.91   1 
  -1  -2  13 2517.06 534.424  24 
   1  -2 -13 1494.56 621.113  12 
   1   2  13 2602.62 408.251  26 
   1  -2  13 2650.11 483.646  17 
   1   2  13 2743.58 455.981   6 
  -1  -2 -13 2771.00 2618.82   4 
   1   2 -13 1592.41 929.570   1 
   1   2  13 2277.86 459.447  25 
   1  -2  13 2478.32 416.515  15 
  -1   2  14 1560.01 451.027  24 
   1   2  14 1626.70 352.344   6 
  -1  -2  14 1648.27 318.334  15 
   1   2  14 1781.96 399.991  17 
  -1   2  14 1598.42 457.947  25 
  -1  -2  14 1387.92 397.177  17 
   1  -2  14 1695.42 436.896  17 
   1  -2 -14 1170.85 1254.50   1 
  -1   2  14 1724.04 347.792  14 
   1  -2  14 1559.29 381.655  25 
   1  -2  14 1704.28 357.132  15 
   1  -2  14 1432.00 383.733  24 
   1  -2  14 1081.13 269.536   6 
  -1  -2  14 1543.08 470.636  16 
  -1  -2  14 1687.67 358.309   6 
  -1  -2  14 1701.64 423.603  25 
   1  -2  14 1684.82 501.429  16 
   1  -2  14 1244.26 342.850   9 
  -1   2  14 1481.13 427.926  17 
  -1   2  14 1600.94 360.287   6 
   1   2  14 1664.84 370.968  14 
  -1  -2  14 1866.87 458.417  24 
  -1  -2  14 1839.51 383.437  14 
   1  -2 -14 1125.62 555.940  12 
  -1  -2  14 1596.32 384.879  26 
   1  -2 -14 1569.94 417.629   7 
  -1  -2 -14 1517.41 535.822  12 
  -1   2  14 1504.36 360.903  26 
   1  -2  14 1585.01 362.875  14 
  -1   2 -14 1620.47 1008.91   1 
   1  -2  15 35860.0 1716.14   6 
  -1  -2  15 35830.1 2001.73  17 
  -1   2  15 36320.9 2048.55  17 
   1   2  15 36510.8 1988.25  17 
  -1  -2  15 33961.0 2036.35  25 
  -1   2  15 35625.6 2467.20  16 
  -1  -2  15 34181.8 2046.53  24 
   1  -2  15 34184.4 1693.76  14 
  -1   2  15 37319.7 1795.03  26 
   1   2  15 35876.7 1690.61  14 
  -1  -2  15 35288.8 1570.01  15 
  -1  -2  15 36075.1 1725.54  14 
   1  -2  15 30018.7 1678.07   9 
   1  -2 -15 29543.5 2663.73  12 
   1   2  15 33697.6 2387.48  16 
  -1   2  15 33210.8 2099.52  25 
   1  -2  15 36877.7 2334.16  16 
  -1   2  15 37686.7 1745.69   6 
   1  -2  15 33303.4 1811.13  24 
  -1   2  15 33734.1 2123.24  24 
   1  -2  15 33237.3 1804.66  25 
   1  -2  15 34513.5 2023.94  17 
  -1  -2  15 36571.3 2381.88  16 
   1  -2  15 33186.2 1679.80  15 
   1   2  15 37370.7 1727.33   6 
  -1  -2  15 37426.0 1982.55  26 
  -1  -2 -15 29789.1 2421.38  12 
  -1  -2  15 37088.3 1739.03   6 
  -1   2  15 35680.8 1701.11  14 
  -1   2  16 42529.1 2387.59  25 
  -1  -2 -16 38710.5 2777.86  12 
  -1   2  16 41177.0 2287.38  17 
   1   2  16 44105.6 2770.46  16 
  -1  -2  16 45063.3 2703.53  16 
  -1   2  16 47867.2 1998.50   6 
   1  -2  16 42579.1 2074.93  25 
   1  -2  16 45141.2 2666.13  16 
   1   2  16 46352.9 2012.11   6 
  -1  -2  16 44175.3 1763.06  15 
  -1   2  16 42712.4 1961.37  26 
  -1  -2  16 44457.7 2331.67  17 
   1   2  16 44137.7 1947.65  14 
  -1  -2  16 45594.3 2024.70  14 
  -1  -2  16 42606.6 2286.34  24 
   1  -2  16 43345.6 2318.32  17 
   1  -2  16 44063.6 1925.82  15 
   1  -2 -16 38126.2 3031.93  12 
  -1   2  16 44553.7 1951.58  14 
   1  -2  16 42434.7 2067.60  24 
  -1   2  16 42857.6 2774.70  16 
   1   2  16 43574.9 2249.35  17 
   1  -2  16 44663.2 1980.81  14 
  -1  -2  16 42140.4 2273.06  25 
   1  -2  16 36885.3 1862.40   9 
  -1   2  16 41446.3 2366.85  24 
  -1  -2  17 153.577 245.946  24 
  -1   2  17 67.1350 20.2277  14 
  -1   2  17-36.3876 55.9892  25 
  -1   2  17 358.871 231.321  17 
   1  -2  17 25.5933 177.295  16 
   1  -2  17 90.1500 153.912  17 
   1  -2 -17 59.7334 219.925  12 
  -1   2  17-141.789 225.736  24 
  -1  -2  17-51.7036 147.985  16 
  -1  -2  17 136.195 107.461  14 
   1   2  17 80.8712 152.472  16 
  -1  -2  17-209.678 190.308  21 
  -1  -2  17-23.7789 76.1752  17 
   1   2  17 83.1478 130.480  14 
   1  -2  17-99.1062 84.7477  25 
  -1   2  17-45.3991 35.3191   6 
   1  -2  17-151.886 151.013  15 
   1  -2  17 55.5510 41.8965  14 
   1  -2  17 4.50817 111.095  24 
  -1  -2  17 59.6120 132.830  25 
   1   2  17 84.1420 91.7003   6 
   1   2  17-83.3172 105.450  17 
  -1   2  17 267.345 186.587  16 
  -1  -2 -17-23.2631 123.124  12 
  -1  -2 -18 191.918 281.974  12 
  -1  -2  18 204.963 109.833  14 
   1  -2  18 421.828 264.646  17 
  -1  -2  18 221.725 152.928  17 
  -1  -2  18 286.280 262.292  16 
   1   2  18 380.029 187.086   6 
  -1  -2  18 291.950 147.487  21 
   1  -2  18 320.551 170.994  16 
   1  -2  18 233.716 150.807  21 
  -1   2  18 241.795 132.069   6 
  -1   2  18 429.799 267.736  24 
   1  -2  18 156.272 39.0764  15 
   1  -2 -18-108.577 29.4475  12 
  -1   2  18 261.575 191.853  25 
  -1   2  18 102.565 150.377  17 
   1   2  18 468.044 252.329  14 
   1   2  18 198.608 166.375  16 
  -1  -2  18 240.086 201.500  25 
   1  -2  18 258.668 177.711  14 
  -1  -2  18 214.991 73.3712  24 
   1   2  18 288.355 179.349  17 
  -1   2  18 357.242 178.267  14 
  -1   2  18 298.822 362.052  16 
  -1   2  19 3575.01 610.506  25 
  -1   2  19 4238.36 609.427  14 
   1   2  19 3254.64 538.033  15 
  -1  -2  19 3997.98 618.302  14 
  -1   2  19 3221.13 641.432  17 
   1   2  19 3422.24 612.218  17 
  -1  -2 -19 2077.69 604.248  10 
   1   2  19 4122.85 589.159   6 
  -1   2 -19 3560.82 696.216  10 
  -1   2  19 3333.89 750.722  16 
   1  -2  19 3687.06 738.244  21 
   1  -2  19 4322.80 599.163  14 
  -1   2  19 3328.23 594.029  24 
   1  -2  19 4363.47 545.896  15 
  -1  -2  19 3344.25 704.515  16 
  -1   2  19 4008.85 579.365   6 
   1   2  19 3462.69 741.208  16 
  -1  -2  19 3468.61 624.736  24 
   1  -2  19 4120.40 689.182  17 
   1  -2 -19 1890.99 628.050  12 
  -1  -2 -19 1935.79 560.374  12 
   1   2  19 4154.76 583.739  14 
  -1  -2  19 3592.17 646.429  17 
  -1  -2  19 3614.26 587.251  25 
  -1  -2  19 3832.14 764.430  21 
   1  -2  19 4122.39 811.547  16 
  -1  -2  20 3294.95 545.607  14 
  -1   2  20 3177.45 497.666  14 
   1  -2 -20 1263.73 416.213  12 
  -1  -2  20 3169.95 675.510  21 
   1   2  20 2305.38 553.379  16 
  -1  -2  20 2453.54 461.230  25 
   1   2  20 2826.57 475.952   6 
   1  -2  20 2928.14 637.563  16 
  -1   2 -20 2439.88 632.660  10 
  -1  -2  20 2440.70 460.069  24 
  -1   2  20 2237.97 575.667  16 
   1   2  20 2904.45 502.430  17 
   1  -2  20 2784.98 628.555  21 
   1  -2  20 3432.86 465.792  15 
  -1  -2 -20 1469.24 455.490  12 
   1  -2  20 2961.83 503.772  14 
  -1  -2 -20 1934.40 515.392  10 
  -1  -2  20 3012.89 655.649  16 
  -1   2  20 2537.98 536.553  17 
  -1  -2  20 3194.04 579.747  17 
  -1   2  20 2999.18 483.345   6 
   1   2  20 3449.04 502.248  14 
  -1   2  21 10951.2 1224.60  16 
  -1  -2  21 11253.1 911.566  24 
   1   2  21 14835.6 1019.80   6 
  -1  -2 -21 8679.16 968.799  10 
   1  -2  21 13971.7 1057.26  14 
   1  -2  21 13131.7 1283.58  16 
   1   2 -21 10682.1 1179.58  10 
   1  -2  21 15036.3 1345.43  21 
   1   2  21 11570.1 1236.08  16 
  -1  -2  21 13594.0 1292.08  16 
  -1  -2  21 13779.9 1096.75  14 
  -1  -2  21 13820.7 1307.10  21 
   1   2  21 12841.9 1066.32  17 
  -1   2  21 15076.4 1052.95  14 
  -1   2  21 13323.9 1103.02  17 
  -1  -2  21 11698.4 922.750  25 
  -1   2  21 14652.8 1016.63   6 
  -1   2 -21 10822.2 1171.80  10 
   1   2  21 15177.4 1042.91  14 
  -1  -2 -22 7074.04 829.181  10 
   1   2 -22 10505.1 1080.91  10 
  -1  -2  22 15526.7 1044.19  14 
  -1   2  22 12524.6 1150.87  16 
  -1  -2  22 13967.5 1211.09  16 
   1  -2  22 14167.1 983.411  14 
   1   2  22 17843.1 1024.99  14 
   1  -2  22 15990.2 1248.55  21 
  -1   2  22 13958.5 1055.28  17 
  -1   2  22 14686.0 1242.44  21 
  -1  -2  22 14883.8 1234.51  21 
   1  -2 -22 7702.82 865.410  10 
  -1   2 -22 12990.8 1087.31  10 
   1   2  22 13987.5 1012.92  17 
   1  -2  22 14260.5 1196.83  16 
  -1   2  22 17117.8 1020.46  14 
   1   2  22 12589.2 1139.13  16 
  -1   2  23 1868.62 302.509  14 
   1  -2  23 1252.00 273.421  14 
   1   2 -23 867.351 266.521  10 
  -1   2  23 1732.11 370.503  21 
   1   2  23 1056.59 270.795  16 
   1  -2  23 1386.70 318.600  21 
  -1   2  23 1100.50 303.415  16 
  -1   2 -23 914.107 280.952  10 
  -1  -2  23 1583.92 339.922  21 
  -1  -2  23 1337.65 280.426  14 
   1   2  23 1876.80 307.456  14 
   1   2  23 1801.78 363.775  21 
  -1   2  23 1086.73 227.862  17 
   1  -2  23 1658.73 364.930  16 
  -1  -2  23 1446.03 339.848  16 
  -2  -2   0 31902.0 2969.31   4 
  -2  -2   0 36228.5 2579.84   1 
   2   2   0 34700.6 2124.12   1 
   2   2   0 30768.9 2504.42   5 
   2  -2   0 35719.7 2678.04   1 
   2  -2   0 34560.2 1954.60   1 
   2   2  -1 114986. 3509.19   3 
   2  -2   1 100349. 3515.52   1 
   2   2   1 117661. 5015.71   1 
  -2  -2   1 96086.2 2068.75   1 
  -2  -2  -1 113820. 6132.25   4 
  -2  -2  -1 114477. 2054.61   3 
  -2   2  -1 110549. 3563.70   1 
   2  -2  -1 107766. 4797.78   1 
  -2  -2  -1 109115. 1956.16   2 
  -2  -2   1 96523.7 4456.34   5 
   2   2   1 94642.1 4634.89   5 
  -2  -2  -1 110672. 5511.68   1 
   2   2  -1 110686. 3329.67   2 
  -2  -2   1 101815. 4980.03   4 
  -2  -2  -1 98733.0 4794.30   5 
   2  -2  -1 107342. 3472.37   1 
   2   2  -1 107002. 4570.39   5 
  -2  -2   1 109167. 3412.49   1 
   2   2  -2 324869. 7045.22   3 
  -2   2   2 305407. 7736.68   2 
  -2  -2  -2 298559. 10983.7   4 
   2  -2   2 316891. 6906.69   1 
  -2  -2  -2 298788. 10752.6   1 
   2   2   2 336321. 9289.83   5 
   2   2   2 387675. 11118.1   1 
  -2  -2   2 326754. 5084.05   1 
   2   2   2 356157. 10907.3   4 
  -2  -2   2 247343. 6887.57   4 
  -2   2  -2 253693. 5792.81   1 
   2   2  -2 308898. 6730.10   2 
  -2  -2   2 313682. 7920.37   5 
   2  -2  -2 340529. 9372.09   1 
  -2   2   2 298516. 7830.05   3 
  -2   2   2 330521. 8948.54   1 
  -2   2   3 6369.79 1164.88   3 
  -2  -2   3 4673.66 706.698   1 
   2   2  -3 9744.96 1361.06   2 
  -2   2   3 7819.39 1529.40   1 
   2   2   3 8633.79 1906.75   1 
   2   2   3 7931.25 1517.15   5 
  -2   2   3 6179.70 1120.11   2 
  -2  -2  -3 8432.77 2199.45   4 
   2  -2  -3 6993.20 663.709   5 
  -2  -2   3 8394.01 1306.80   5 
  -2   2  -3 8541.63 1160.03   1 
   2  -2  -3 8559.98 1706.87   1 
  -2  -2  -3 8755.47 2064.92   1 
   2   2  -3 8575.64 1309.23   3 
   2   2  -3 8284.52 669.494   1 
   2   2   3 9339.54 1911.48   4 
   2  -2   3 8122.18 1274.60   1 
   2  -2  -4 32699.5 3169.79   2 
  -2   2  -4 36846.6 2689.46   1 
   2   2  -4 35178.0 1702.14   1 
  -2   2   4 33460.0 2833.57   2 
   2   2   4 38274.9 4552.73   1 
  -2  -2   4 26631.3 2333.54   1 
  -2  -2   4 33642.9 2771.97   5 
  -2  -2  -4 41472.2 4680.17   1 
   2   2  -4 40765.9 3166.01   2 
   2  -2   4 40470.6 5099.64   4 
  -2  -2  -4 39550.3 4907.51   4 
  -2   2   4 33571.7 3431.07   1 
   2   2   4 32508.3 3275.69   5 
   2  -2  -4 36759.1 4093.87   1 
  -2   2   4 33610.3 2873.23   3 
   2  -2   4 38408.3 3091.74   1 
   2   2  -4 41129.3 3258.98   3 
   2  -2  -4 32632.3 3191.46   3 
   2  -2  -5 3310.16 1121.21   3 
  -2  -2   5 2281.90 967.448   1 
  -2  -2  -5 3318.12 1443.00   1 
  -2   2   5 4051.89 1048.70   3 
  -2  -2  -5 4187.52 1818.25   4 
  -2  -2   5 4195.22 1001.65   5 
  -2   2  -5 4734.74 1007.49   1 
   2  -2  -5 3444.65 1108.62   2 
  -2   2   5 4002.35 1098.15   2 
   2   2   5 3466.57 1129.48   5 
   2  -2  -5 3912.74 1730.97   1 
  -2   2   5 3146.50 1197.38   1 
   2   2  -5 4005.07 690.434   1 
   2  -2   5 4609.19 1682.03   4 
  -2  -2  -6 33161.8 4954.34   1 
  -2  -2   6 20435.2 3141.41   1 
  -2  -2  -6 35842.6 6159.46   4 
  -2   2  -6 37287.0 3229.08   1 
   2  -2  -6 30822.3 5181.91   1 
   2  -2   6 32905.8 5187.43   4 
   2   2  -6 35718.5 2401.17   1 
  -2   2  -7 35001.3 3305.20   1 
   2   2  -7 31863.3 2574.61   1 
  -2  -2   7 16096.1 3283.50   1 
  -2  -2  -7 30108.3 5857.38   4 
   2  -2  -7 23737.3 4885.21   1 
  -2  -2  -7 28086.5 4748.50   1 
  -2   2  -8 36909.1 3689.81   1 
  -2  -2  -8 36208.5 5308.21   1 
   2   2  -8 34479.5 2968.64   1 
  -2  -2  -8 39946.6 7136.30   4 
   2  -2  -8 33416.2 4427.96   4 
   2  -2  -8 22075.0 4969.68   1 
   2   2  -9 15206.1 2154.14   1 
   2  -2   9 18094.9 1036.79  17 
  -2  -2   9 16159.9 1161.25  25 
  -2   2  -9 15632.1 2516.16   1 
   2  -2  -9 10958.7 2727.76   4 
  -2  -2  -9 15545.3 4779.82   4 
  -2  -2   9 16982.9 1193.71  24 
   2  -2  -9 9713.47 3186.20   1 
   2  -2   9 16844.9 853.810   6 
  -2  -2   9 16044.0 838.852  14 
  -2   2   9 15465.7 1096.05  17 
  -2  -2  -9 16903.9 3684.38   1 
  -2  -2   9 17740.2 1098.44  26 
  -2   2  10 133.356 126.643   8 
  -2   2  10 78.6443 52.6096  17 
  -2   2 -10-138.996 563.469   1 
  -2  -2 -10-34.9077 123.293  12 
   2   2  10 167.728 65.0128   6 
  -2  -2  10 91.7698 42.4387  16 
  -2   2  10 193.825 92.1673  26 
  -2  -2  10 55.0390 51.9952  24 
  -2  -2  10 237.534 148.277  26 
  -2  -2  10 299.775 117.563  14 
   2  -2  10 110.070 38.1360   9 
  -2  -2 -10 306.045 214.356  23 
   2   2  10 115.948 59.9020  14 
   2  -2  10 10.2712 107.385  17 
  -2  -2 -10-492.761 1086.95   4 
  -2  -2  10 59.6447 39.1830   6 
  -2  -2  10 201.398 135.250  17 
  -2   2  10 121.631 134.320  25 
   2  -2  10 383.647 185.701  16 
   2  -2  10 94.9307 53.8659   6 
  -2   2  10 199.802 131.991  14 
   2  -2  10 238.920 91.8585  14 
  -2  -2 -10 788.968 1006.84   1 
   2  -2 -10 637.261 990.697   1 
   2   2 -10 42.2404 171.064   1 
   2  -2 -10 402.191 695.740   4 
  -2   2  10 194.345 102.124  24 
  -2  -2 -10 146.332 127.782   7 
   2   2  10 108.305 125.479  17 
  -2  -2  10 219.534 103.715  25 
  -2   2  11 33575.4 1734.30  17 
   2  -2  11 33798.6 1369.28   6 
   2   2  11 35741.6 1661.01  17 
  -2  -2  11 32159.9 1629.99  17 
   2  -2  11 29654.8 1434.45  24 
   2   2  11 31450.2 1383.01  14 
  -2  -2  11 31566.2 1807.10  25 
   2  -2  11 32682.7 1880.44  16 
   2  -2  11 29626.1 1431.98  25 
  -2  -2  11 36709.1 1672.25  26 
   2   2 -11 28435.6 3366.20   1 
   2  -2  11 31681.5 1301.81  14 
  -2  -2 -11 31514.7 1914.01  23 
  -2   2  11 30590.2 1397.66   8 
  -2  -2  11 31316.1 1800.02  24 
  -2  -2  11 26511.1 3369.71   5 
  -2   2  11 32443.3 1365.75  14 
  -2   2  11 29499.2 1858.70  25 
  -2  -2  11 31780.4 1329.84  14 
   2  -2 -11 19517.1 4419.02   1 
  -2   2  11 33761.1 1604.87  26 
   2   2  11 35591.8 1456.29   6 
  -2  -2  11 32755.5 1333.88   6 
  -2   2  11 34492.9 1450.66   6 
   2  -2 -11 17091.7 4444.58   4 
  -2  -2 -11 28308.2 7509.81   4 
  -2  -2  11 32656.4 1904.69  16 
   2  -2  11 34100.1 1611.28  17 
  -2  -2 -11 29959.5 5219.74   1 
   2  -2  11 31640.8 1423.10   9 
   2  -2 -11 30630.5 1505.41   7 
  -2   2  11 29903.9 1875.77  24 
  -2   2 -11 31602.6 4185.88   1 
  -2  -2 -11 35658.7 2428.38  12 
   2  -2  12 9143.29 838.033  25 
  -2   2  12 10579.8 916.819  26 
   2   2  12 9743.63 919.753  17 
   2  -2  12 10194.9 942.613  17 
  -2  -2  12 9926.56 770.923   6 
   2  -2  12 9191.07 747.170  14 
   2  -2  12 10286.1 804.372   6 
  -2  -2  12 9354.64 1076.53  16 
   2  -2  12 9430.60 1065.37  16 
  -2  -2  12 9322.22 1011.48  25 
   2   2 -12 8743.22 2051.42   1 
   2  -2 -12 5729.94 2519.28   1 
  -2   2  12 9508.75 983.221  17 
  -2  -2 -12 8875.45 1000.45  23 
   2   2  12 9676.75 764.697   9 
  -2  -2  12 9596.29 893.101  26 
  -2  -2 -12 8306.75 2994.05   1 
   2  -2 -12 4275.33 2393.86   4 
  -2   2  12 9421.18 770.889  14 
  -2   2 -12 9844.83 2599.37   1 
  -2  -2 -12 7843.94 4179.22   4 
   2  -2  12 9422.70 822.432   9 
  -2  -2  12 9003.45 756.722  14 
   2   2  12 9313.49 773.328  14 
   2  -2  12 8838.53 827.410  24 
  -2  -2 -12 8992.88 1287.72  12 
   2   2  12 11129.8 841.570   6 
  -2  -2  12 9423.80 1023.06  24 
  -2   2  12 10181.2 827.050   6 
  -2   2  12 8685.91 1042.47  24 
  -2   2  12 8762.72 1045.25  25 
   2  -2 -12 9310.52 857.604   7 
  -2  -2  12 9473.74 918.010  17 
  -2   2  13 23918.6 1457.60  26 
  -2   2 -13 22412.1 3861.30   1 
   2   2  13 24501.9 1503.18  17 
  -2   2  13 24110.9 1305.13   6 
  -2  -2  13 23763.8 1785.27  16 
  -2  -2 -13 21071.0 1956.09  12 
   2  -2  13 24206.0 1277.23   6 
  -2   2  13 22693.6 1264.68  14 
  -2  -2  13 23421.0 1268.32   6 
  -2  -2  13 22223.2 1600.44  25 
   2  -2  13 21282.2 1311.74  24 
   2   2  13 23123.0 1260.43  14 
  -2  -2 -13 22091.7 1633.68  23 
  -2   2  13 22646.2 1724.79  25 
   2  -2 -13 13163.7 3807.84   1 
  -2  -2 -13 16637.3 6126.74   4 
  -2   2  13 21745.0 1686.30  24 
   2  -2  13 21695.8 1339.55   9 
   2  -2  13 22515.6 1233.81  14 
  -2  -2 -13 18913.1 4610.90   1 
   2   2  13 24315.2 1314.55   6 
  -2  -2  13 22470.7 1261.44  14 
   2  -2 -13 19140.1 2135.84  12 
   2  -2  13 23408.7 1716.00  16 
  -2   2  13 22971.2 1558.87  17 
  -2  -2  13 22134.7 1608.41  24 
  -2  -2  13 24001.0 1518.84  17 
  -2  -2  13 25098.5 1532.80  26 
   2   2  13 22036.3 1215.65   9 
   2  -2  13 21819.5 1326.41  25 
   2  -2 -13 21499.5 1363.61   7 
   2  -2  13 24793.0 1520.94  17 
  -2  -2 -14 5744.89 1039.42  12 
  -2   2  14 6554.68 948.077  24 
  -2   2  14 6221.61 860.848  17 
  -2  -2  14 6927.10 995.773  16 
  -2   2  14 6482.62 947.665  25 
   2   2  14 6074.52 1011.85  16 
  -2  -2 -14 6821.30 885.992  23 
   2   2  14 7465.40 875.326  17 
   2  -2  14 6813.79 973.462  16 
   2  -2  14 6272.17 711.695  24 
   2  -2 -14 6518.70 1290.65  12 
   2  -2  14 6413.37 724.354  25 
  -2   2  14 6850.04 769.373  26 
   2  -2  14 6636.57 722.016  14 
   2   2  14 6907.43 733.988   6 
  -2  -2  14 6899.69 881.076  17 
   2  -2  14 6390.97 777.499   9 
  -2  -2  14 6820.24 720.872  14 
   2  -2 -14 6391.60 764.881   7 
   2  -2  14 7081.99 734.786   6 
   2  -2  14 6905.72 855.858  17 
   2   2  14 6770.66 728.836  14 
  -2  -2  14 6938.44 719.901   6 
  -2  -2  14 6691.30 887.588  25 
  -2   2  14 6889.59 738.071   6 
   2  -2  14 6463.16 727.656  15 
  -2   2  14 6702.83 701.924  14 
  -2  -2  14 6978.84 849.708  26 
   2  -2 -14 3322.43 1990.53   1 
  -2  -2 -14 4037.86 3066.05   4 
  -2  -2  14 6949.64 911.704  24 
   2  -2  15 2650.48 476.838  14 
  -2   2  15 3077.88 493.841   6 
  -2  -2  15 2615.88 660.920  16 
  -2  -2  15 2983.38 498.963  14 
   2   2  15 3125.28 493.494   6 
   2   2  15 2478.38 668.280  16 
   2  -2  15 2941.39 665.067  16 
   2  -2  15 2271.74 469.680   9 
  -2   2  15 2570.42 611.055  25 
   2   2  15 2848.74 465.379  14 
   2  -2 -15 2044.95 721.753  12 
  -2  -2  15 2939.09 551.664  26 
   2  -2  15 2515.08 489.503  15 
  -2  -2 -15 3103.43 580.909  23 
   2  -2 -15 2803.65 494.117   7 
  -2  -2 -15 2704.18 680.935  12 
  -2   2  15 2655.25 620.068  24 
  -2  -2  15 2690.92 574.197  17 
  -2   2  15 2898.13 467.942  14 
  -2  -2  15 2641.96 576.528  24 
   2  -2  15 2731.43 550.239  17 
  -2   2  15 2782.03 503.686  26 
  -2  -2  15 2861.40 596.656  25 
  -2   2  15 2688.56 588.817  17 
   2   2  15 2753.20 530.725  17 
  -2   2  16 4895.50 761.496  17 
   2   2  16 5384.48 675.591   6 
   2  -2  16 5472.21 803.748  17 
  -2   2  16 4858.65 848.928  25 
   2   2  16 4195.36 877.815  16 
  -2  -2  16 5021.07 910.769  16 
   2  -2  16 5181.11 866.918  16 
  -2   2  16 4972.25 677.708  26 
   2   2  16 5255.46 640.486  14 
   2   2  16 4644.02 726.170  17 
  -2   2  16 5158.58 665.006  14 
  -2   2  16 5368.56 661.955   6 
   2  -2  16 4709.26 673.115  14 
  -2  -2 -16 3850.69 879.425  12 
  -2  -2  16 5355.22 849.152  24 
  -2   2  16 4527.74 796.854  24 
   2  -2  16 4325.44 668.932   9 
  -2  -2  16 4638.44 848.949  21 
   2  -2 -16 3602.95 920.833  12 
  -2  -2  16 4869.94 805.555  25 
  -2  -2  16 4901.79 679.908  14 
  -2  -2  16 4339.65 755.430  26 
  -2  -2  16 4753.87 775.714  17 
   2  -2  16 4588.21 669.819  15 
  -2   2  16 4695.58 927.473  16 
   2  -2  17 12813.8 1426.25  16 
  -2   2  17 11076.6 1463.90  16 
  -2   2  17 12840.9 1332.51  24 
   2  -2  17 10934.0 1068.93   9 
   2   2  17 13997.4 1074.21   6 
  -2   2  17 13280.0 1118.28  26 
  -2  -2  17 12790.9 1462.87  16 
  -2  -2  17 12273.5 1394.72  21 
  -2  -2  17 11999.0 1088.01  14 
   2   2  17 13758.4 1080.20  14 
   2   2  17 12562.8 1193.59  17 
  -2  -2  17 13528.8 1301.15  17 
  -2   2  17 13753.4 1094.24   6 
  -2   2  17 12330.4 1269.20  17 
   2  -2  17 14882.2 1363.35  17 
   2  -2  17 13139.3 1100.33  14 
  -2  -2 -17 9397.94 1347.41  12 
   2  -2 -17 8890.69 1564.50  12 
   2   2  17 11283.4 1424.67  16 
  -2   2  17 13147.3 1071.90  14 
  -2  -2  17 12985.5 1301.26  25 
   2  -2  17 13490.6 1089.76  15 
  -2   2  17 12096.2 1291.12  25 
  -2  -2  17 13078.4 1302.69  24 
  -2   2 -17 11893.7 1333.06  10 
  -2  -2 -18 2539.24 693.928  12 
  -2   2  18 3474.72 699.170  17 
   2   2  18 3999.46 591.543  14 
  -2  -2  18 3911.35 662.179  17 
   2  -2 -18 1687.83 617.677  12 
   2   2  18 3614.80 665.030  17 
  -2  -2  18 3725.15 681.030  24 
  -2   2  18 3610.59 709.508  25 
  -2   2  18 3333.53 807.959  16 
   2  -2  18 4105.99 592.285  15 
  -2  -2 -18 2127.09 611.407  10 
   2  -2  18 3674.71 674.370  17 
  -2  -2  18 3699.33 663.135  25 
  -2  -2  18 3682.09 751.617  21 
  -2   2  18 4060.57 570.764   6 
  -2   2 -18 3136.99 684.858  10 
   2   2  18 4229.84 612.556   6 
   2  -2  18 4185.61 619.901  14 
  -2   2  18 4088.37 589.201  14 
  -2  -2  18 3844.96 774.200  16 
  -2   2  18 3697.08 696.682  24 
  -2  -2  18 4225.48 667.259  14 
   2   2  18 3416.72 778.910  16 
   2  -2  18 3560.01 723.720  16 
  -2  -2  19 5951.71 820.881  25 
   2   2  19 5649.84 778.347  17 
   2  -2 -19 3573.14 826.009  12 
  -2   2  19 5603.21 1015.64  16 
  -2   2  19 5761.92 829.384  25 
   2  -2  19 6659.85 1010.96  21 
  -2   2  19 6828.27 742.309   6 
  -2  -2  19 5987.63 833.032  24 
   2   2  19 6770.79 740.071  14 
   2  -2  19 6925.36 791.846  14 
  -2  -2 -19 3765.79 772.987  12 
  -2  -2  19 6263.08 991.167  21 
  -2  -2  19 5915.30 836.780  17 
  -2   2  19 6224.20 843.925  17 
  -2   2  19 5520.48 817.139  24 
  -2   2 -19 5414.01 908.641  10 
  -2   2  19 6888.11 784.802  14 
   2   2  19 7341.83 761.933   6 
   2  -2  19 6349.31 948.579  16 
   2  -2  19 6898.64 749.860  15 
  -2  -2  19 6227.12 802.092  14 
   2   2  19 5684.28 939.301  16 
  -2  -2 -19 3874.30 745.668  10 
  -2  -2  19 6265.05 994.968  16 
   2   2  20 4036.08 542.705   6 
  -2  -2  20 3331.76 668.732  16 
  -2  -2  20 3180.85 567.620  25 
  -2   2  20 3976.18 565.454  14 
  -2  -2  20 3233.85 591.119  17 
  -2  -2 -20 1961.64 564.426  10 
  -2  -2 -20 1945.80 480.471  12 
  -2   2  20 3232.91 566.281  24 
   2   2  20 3349.70 518.507  15 
   2   2  20 3255.09 570.321  17 
  -2   2  20 2778.63 697.672  16 
   2  -2  20 3585.63 688.437  21 
  -2  -2  20 3519.79 569.327  14 
   2  -2  20 3973.40 515.022  15 
  -2   2 -20 2525.27 618.414  10 
  -2  -2  20 3200.33 560.205  24 
   2  -2  20 3498.82 547.626  14 
   2  -2  20 3132.68 626.240  16 
   2   2  20 3742.49 513.321  14 
  -2   2  20 3799.96 541.948   6 
  -2   2  20 3359.54 564.868  25 
   2  -2 -20 1162.75 419.915  12 
  -2   2  20 3246.37 558.656  17 
  -2  -2  20 3441.12 687.255  21 
   2   2  20 2897.57 624.248  16 
   2   2  21 2116.24 436.811  17 
  -2  -2  21 1859.02 440.084  17 
  -2   2  21 1733.28 461.547  16 
   2  -2  21 2802.14 385.604  15 
  -2  -2  21 1901.50 387.285  25 
   2  -2  21 2281.32 508.463  16 
  -2  -2  21 1900.97 371.977  24 
  -2   2  21 1878.56 397.662  17 
  -2  -2 -21 1123.30 351.261  10 
   2   2  21 2326.86 354.402  15 
   2   2  21 1766.48 448.302  16 
   2  -2  21 2166.98 375.714  14 
   2   2  21 2580.52 434.601  14 
  -2   2  21 2276.55 397.625  14 
   2  -2  21 2254.68 524.163  21 
  -2  -2  21 2254.27 526.562  16 
  -2   2  21 2288.27 517.842  21 
  -2  -2  21 2096.89 404.641  14 
  -2   2 -21 1469.68 410.436  10 
  -2  -2  21 2191.42 518.833  21 
  -2   2  22 483.293 213.423  16 
  -2   2  22 450.517 176.291  17 
  -2   2  22 602.217 188.834  14 
   2   2  22 454.076 217.900  16 
  -2  -2  22 378.582 141.931  16 
   2  -2  22 505.748 180.356  14 
   2   2  22 536.306 167.600  14 
   2  -2  22 464.793 197.655  21 
  -2   2  22 897.781 280.774  21 
  -2   2 -22 364.054 189.126  10 
  -2  -2  22 710.336 213.855  14 
   2  -2  22 571.583 197.887  16 
  -2  -2  22 497.769 202.113  21 
   2  -2 -22 233.444 168.428  10 
  -2  -2  22 333.941 124.734  24 
  -2  -2  22 304.519 148.227  25 
  -2  -2 -22 243.720 136.895  10 
   2   2 -22 545.036 240.849  10 
  -2   2  23 13469.9 816.157  14 
   2   2  23 11573.1 979.045  21 
  -2   2 -23 7742.27 813.259  10 
   2  -2  23 12594.0 972.027  21 
  -2  -2  23 10002.4 793.513  14 
  -2  -2  23 11112.9 919.255  21 
   2  -2  23 10966.1 893.675  16 
   2   2 -23 6689.48 744.489  10 
  -2   2  23 11610.9 888.325  21 
   2   2  23 13806.5 787.221  14 
  -2   2  23 8865.95 843.602  16 
   2   2  23 8873.96 779.393  16 
  -2  -2  23 10652.4 897.653  16 
  -2   2  23 10731.7 802.550  17 
  -3  -2   0-11.8293 43.0611   2 
   3   2   0 22.8853 181.820   1 
  -3  -2   0 157.946 140.948   1 
  -3  -2   0 107.127 188.451   3 
   3   2   0-155.619 342.367   4 
  -3  -2   0-175.295 304.634   4 
   3   2   0 159.459 353.325   5 
   3  -2   0 85.6017 98.5690   1 
  -3  -2  -1 26723.0 2695.77   1 
  -3  -2   1 32037.4 2252.37   3 
   3   2  -1 30379.9 2684.12   4 
  -3  -2  -1 28728.1 1707.93   2 
  -3  -2  -1 29163.4 4264.15   4 
   3   2   1 28251.3 2878.21   5 
   3   2   1 30219.5 2788.37   1 
   3   2   1 33649.2 3423.59   4 
   3   2  -1 25722.1 1999.99   3 
  -3  -2   1 25792.3 2610.22   5 
   3  -2  -1 25588.6 2512.35   1 
   3   2  -1 27697.8 2035.62   2 
  -3   2  -1 31556.6 2097.87   1 
  -3  -2   1 33692.4 2260.76   2 
   3   2  -1 27859.7 2587.86   5 
   3  -2   1 28562.3 2079.29   1 
  -3  -2   1 25114.4 3327.29   4 
   3  -2  -1 26057.6 1889.18   1 
  -3  -2  -1 27212.2 1709.54   3 
  -3   2   2 10195.0 1632.30   2 
  -3  -2   2 12431.7 1950.23   4 
   3  -2  -2 10309.5 1203.92   1 
   3   2  -2 12266.8 1417.47   4 
  -3   2  -2 11220.2 1330.44   1 
   3   2  -2 10244.5 1564.70   5 
   3  -2  -2 10702.0 1729.26   1 
   3   2  -2 11323.9 1453.93   2 
  -3  -2  -2 12149.0 2738.28   4 
  -3   2   2 10006.0 1633.42   3 
   3  -2   2 9815.12 1340.43   1 
   3   2   2 12153.2 2093.94   1 
   3   2  -2 11186.8 1479.63   3 
  -3  -2  -2 10475.5 1936.36   1 
   3   2   2 11175.1 2157.42   4 
  -3  -2   2 11665.3 1770.94   5 
   3   2   2 9378.58 1743.19   5 
   3   2  -3 197010. 6756.85   2 
  -3   2   3 183279. 7045.16   2 
  -3   2  -3 194040. 5980.19   1 
  -3   2   3 193933. 7531.26   1 
   3   2  -3 176500. 6573.64   3 
   3   2   3 206093. 9995.65   4 
  -3   2   3 191698. 7358.52   3 
  -3  -2   3 198963. 7202.42   5 
   3  -2  -3 211329. 8467.22   1 
  -3  -2  -3 205720. 12843.8   4 
   3   2   3 207022. 8615.39   5 
  -3  -2  -3 207301. 9298.42   1 
   3  -2   3 191272. 6779.52   1 
  -3  -2   4 992.425 510.908   5 
   3  -2  -4 1005.15 731.927   1 
  -3  -2  -4 890.412 513.002   1 
  -3   2   4 1032.26 518.515   2 
   3   2  -4 973.350 529.645   2 
  -3   2   4 890.620 564.696   3 
  -3   2   4 800.291 567.961   1 
   3   2  -4 759.747 533.450   3 
   3  -2   4 1346.70 735.452   4 
   3   2  -4 904.702 190.430   1 
  -3  -2  -4 1113.66 1127.24   4 
  -3   2  -4 1100.16 497.256   1 
   3   2   4 872.445 792.754   1 
  -3  -2   4 145.009 211.488   1 
  -3  -2  -5 34864.0 6003.97   4 
  -3   2   5 33039.0 3327.38   3 
   3  -2  -5 35627.4 4573.36   1 
  -3  -2  -5 36604.0 4517.09   1 
  -3  -2   5 38976.8 3266.70   5 
  -3   2  -5 37144.9 3079.17   1 
  -3   2   5 34477.1 3353.94   2 
  -3   2   5 29303.7 3553.54   1 
   3   2  -5 37506.5 1642.17   1 
   3  -2  -6 173.730 254.853   1 
  -3  -2  -6-9.30789 1212.48   4 
  -3  -2   6-59.6999 129.531   5 
  -3   2  -6 138.624 188.734   1 
  -3  -2  -6 57.2726 146.105   1 
  -3  -2   6 251.995 377.680   1 
   3   2  -6 135.378 105.156   1 
  -3  -2  -7 6368.34 2050.82   1 
   3  -2  -7 4600.46 2163.34   1 
  -3  -2   7 5612.03 1335.76   5 
  -3   2  -7 6176.14 1452.92   1 
  -3  -2  -7 5692.68 2681.49   4 
  -3  -2   7 3392.61 1542.17   1 
   3   2  -7 6028.66 941.556   1 
   3   2  -8 95151.1 4380.95   1 
  -3   2  -8 103499. 6522.04   1 
  -3  -2  -8 95673.3 12196.5   4 
  -3  -2   8 59589.8 6643.86   1 
  -3  -2  -8 100760. 8465.40   1 
   3  -2  -8 65122.7 7826.02   1 
  -3  -2   8 94284.8 5626.57   5 
  -3  -2   9 36659.5 1814.39  25 
   3   2   9 40864.4 1412.03   6 
  -3   2   9 37431.0 1690.60  17 
   3  -2   9 37060.1 1741.08  16 
  -3   2   9 34441.1 1916.85  25 
  -3  -2   9 35214.4 1277.03  14 
   3  -2  -9 22290.4 4616.39   1 
   3   2  -9 29212.7 2679.93   1 
   3  -2   9 39042.2 1570.19  17 
  -3  -2  -9 43528.4 2428.20  12 
   3  -2   9 37578.6 1445.36   9 
  -3   2   9 35635.1 1364.38   8 
   3  -2  -9 23906.1 3933.79   4 
  -3  -2  -9 34494.8 5208.16   1 
  -3  -2   9 36653.5 1807.78  24 
  -3  -2  -9 37314.6 7803.32   4 
   3  -2   9 35837.5 1280.47   6 
  -3  -2  -9 35754.7 2119.97  23 
  -3  -2   9 38047.8 1718.75  26 
  -3   2   9 34146.9 1912.55  24 
   3   2   9 35328.4 1349.41  14 
  -3   2   9 39302.9 1701.44  26 
  -3  -2   9 30768.1 3340.21   5 
  -3   2  -9 34241.5 3980.63   1 
  -3  -2  10 5392.51 652.914  17 
   3   2  10 6468.37 668.136  17 
  -3  -2 -10 5358.31 822.319  23 
   3   2 -10 4802.20 1276.06   1 
  -3  -2 -10 4778.71 2080.90   1 
   3  -2 -10 3211.61 1774.44   1 
  -3   2  10 5955.30 586.715   6 
  -3  -2  10 5550.53 734.951  25 
  -3   2  10 5745.79 823.916  25 
  -3   2  10 5705.77 540.481  14 
  -3   2  10 5979.92 680.376  26 
  -3  -2  10 3994.27 1221.73   5 
  -3   2  10 5555.86 561.949   8 
   3  -2  10 5347.63 505.072  14 
  -3   2  10 5494.16 687.129  17 
  -3  -2  10 5610.45 706.105  26 
  -3  -2  10 5565.98 520.550   6 
  -3   2  10 5226.01 785.096  24 
  -3  -2 -10 6342.60 940.687  12 
   3   2  10 6145.74 593.496   6 
   3  -2  10 6175.31 561.304   6 
  -3   2 -10 6282.35 1813.83   1 
   3  -2  10 5677.00 587.143   9 
   3   2  10 5700.97 576.713  14 
  -3  -2  10 5332.92 535.156  14 
  -3  -2  10 5178.29 754.414  16 
   3  -2  10 5541.84 722.007  16 
  -3   2 -10 7101.95 749.466  23 
   3  -2 -10 2267.58 1339.29   4 
   3  -2 -10 4808.44 596.584   7 
  -3  -2  10 5804.15 763.401  24 
  -3  -2 -10 4996.12 3127.27   4 
   3  -2  10 5697.42 663.126  17 
   3  -2 -11 1152.03 999.691   4 
   3  -2 -11 707.740 896.969   1 
   3  -2  11 1723.64 408.772  16 
  -3   2 -11 2315.22 1110.22   1 
   3  -2 -11 1175.17 310.186   7 
  -3  -2  11 1835.03 455.998  16 
  -3   2  11 1636.91 451.337  25 
   3  -2  11 1787.23 352.719   9 
   3  -2  11 1871.67 391.735  17 
  -3  -2  11 1842.20 408.007  17 
  -3  -2  11 1510.88 317.304  14 
  -3  -2  11 1926.89 323.260   6 
   3   2  11 1905.33 336.887  14 
  -3   2  11 1756.02 315.944  14 
  -3  -2  11 1785.85 440.511  24 
  -3  -2 -11 1892.47 458.990  23 
  -3  -2  11 1695.24 417.767  26 
  -3   2  11 2130.59 352.960   6 
   3   2  11 2059.81 345.668   6 
  -3  -2 -11 2009.99 512.127  12 
  -3  -2 -11 3280.59 2536.38   4 
   3   2  11 1937.78 384.670  17 
  -3   2  11 1583.12 395.490  26 
   3  -2  11 1628.85 321.187  14 
  -3  -2  11 1610.92 410.213  25 
  -3  -2 -11 2424.58 1509.11   1 
  -3   2  11 1349.13 411.260  24 
  -3   2  11 1641.51 318.771   8 
   3  -2  11 1838.29 298.846   6 
  -3   2  11 1546.53 407.490  17 
   3   2 -11 1400.29 671.339   1 
  -3   2  12 5807.59 640.381   6 
  -3  -2  12 5807.71 814.137  25 
   3   2  12 6206.21 722.339  17 
  -3  -2 -12 4728.03 2211.99   1 
  -3  -2  12 6048.35 734.587  17 
   3   2  12 5842.03 624.704   6 
  -3  -2  12 5200.72 584.837   6 
   3  -2  12 5827.64 826.829  16 
  -3   2  12 5784.80 655.492   8 
  -3  -2  12 5514.16 835.845  16 
  -3  -2 -12 5795.63 871.454  23 
  -3   2  12 5482.25 758.695  17 
   3  -2  12 5805.93 650.816   9 
  -3   2  12 5407.58 851.021  24 
  -3  -2  12 5106.28 589.353  14 
   3  -2  12 5866.30 586.006  14 
   3  -2 -12 4908.39 654.017   7 
  -3  -2 -12 5447.00 3412.31   4 
   3   2  12 5711.85 603.986  14 
  -3   2  12 6030.70 745.716  26 
  -3  -2  12 6114.40 789.026  26 
  -3   2  12 5832.12 605.014  14 
   3  -2  12 6124.92 608.131   6 
  -3   2 -12 6681.01 2079.73   1 
  -3  -2 -12 5375.53 974.173  12 
  -3   2  12 5411.66 838.983  25 
  -3  -2  12 5937.29 839.875  24 
   3  -2 -12 2922.38 1713.62   1 
   3  -2  12 6013.00 731.221  17 
  -3  -2  13 34605.0 1560.30  14 
   3   2  13 37051.6 1860.43  17 
   3  -2  13 35972.6 1858.42  17 
  -3  -2  13 38488.4 1922.37  26 
  -3  -2  13 34879.1 1548.99   6 
   3  -2  13 36229.2 1591.09   6 
  -3  -2  13 35657.9 2083.06  25 
   3  -2  13 35238.7 2108.81  16 
  -3   2  13 35919.7 1592.02   6 
  -3  -2  13 35754.2 1886.08  17 
  -3  -2 -13 31311.6 5739.87   1 
  -3   2  13 33169.4 1921.33  17 
   3  -2 -13 20423.4 4682.45   1 
   3   2  13 36468.0 1606.92   6 
  -3   2  13 33251.7 2153.53  24 
  -3  -2 -13 34166.9 2393.66  12 
  -3   2  13 33016.5 2144.11  25 
   3  -2  13 34284.4 1668.60   9 
   3   2  13 32916.7 1592.60   9 
  -3   2  13 34111.3 1789.40  26 
   3  -2  13 35647.2 1517.73  14 
  -3  -2  13 34770.4 2060.84  24 
   3   2  13 34656.4 2226.43  16 
   3  -2 -13 29453.2 1642.05   7 
  -3  -2 -13 32999.4 2050.34  23 
  -3  -2 -13 29568.0 8460.19   4 
  -3   2  13 35698.1 1562.14  14 
  -3   2 -13 33887.1 4953.48   1 
  -3  -2  13 34700.1 2176.43  16 
   3   2  13 33385.5 1541.07  14 
   3  -2  14 51253.0 2363.05  17 
  -3  -2  14 50277.4 2379.68  17 
  -3  -2  14 51036.7 2559.51  21 
  -3  -2  14 51570.4 2020.89  14 
  -3   2 -14 45121.7 2467.76  10 
  -3  -2 -14 44296.3 2734.00  12 
  -3  -2  14 49735.3 2572.07  25 
   3  -2  14 53678.6 2007.92   6 
  -3   2  14 48314.9 2683.74  25 
  -3   2  14 49018.9 2406.15  17 
   3   2  14 54273.4 2022.00   6 
   3  -2  14 51112.0 2127.03   9 
   3  -2  14 51685.2 2075.17  15 
   3   2  14 51293.3 1968.71   9 
   3   2  14 50480.3 2778.29  16 
  -3   2  14 49497.9 2711.53  24 
  -3   2  14 56206.5 2042.62   6 
  -3  -2  14 53068.1 2311.40  26 
  -3   2  14 52247.3 1960.41  14 
   3  -2 -14 39007.3 3169.19  12 
   3   2  14 52354.3 2259.34  17 
  -3  -2 -14 53552.7 2568.82  23 
  -3  -2  14 50775.8 2598.70  24 
  -3  -2  14 51941.1 2745.95  16 
   3  -2  14 50021.5 2620.74  16 
  -3   2  14 52271.3 2271.27  26 
   3   2  14 48451.7 1962.83  14 
   3  -2  14 53284.5 1951.48  14 
  -3   2  15 47979.0 2428.77  17 
  -3  -2  15 50940.1 2423.88  17 
  -3   2  15 53465.9 2058.87   6 
  -3   2 -15 42644.2 2472.48  10 
   3  -2  15 47503.5 2140.04   9 
  -3  -2 -15 44612.5 2790.84  12 
  -3  -2  15 48129.8 2563.74  24 
   3   2  15 46376.4 2718.62  16 
   3  -2  15 49420.0 2673.57  16 
  -3  -2 -15 49394.5 2491.31  23 
   3  -2  15 49231.5 2112.35  15 
   3   2  15 50835.8 2302.76  17 
   3   2  15 50561.6 1935.57   9 
   3   2  15 49814.0 2011.23  14 
  -3  -2  15 45932.6 2582.28  21 
  -3   2  15 48731.4 2720.96  24 
   3   2  15 52765.3 2057.32   6 
  -3  -2  15 52477.7 2379.38  26 
  -3  -2  15 48503.1 2575.36  25 
  -3   2  15 47988.8 2172.97  26 
  -3  -2  15 50411.8 2065.73  14 
  -3   2  15 51138.0 2017.58  14 
   3  -2 -15 34647.1 3072.30  12 
   3  -2  15 51870.3 2390.03  17 
   3  -2  15 50910.0 1976.74  14 
  -3   2  15 48055.5 2708.42  25 
  -3  -2  15 49322.2 2742.86  16 
  -3  -2  16 7309.22 937.886  17 
  -3   2  16 6917.35 1017.37  25 
   3  -2  16 6974.74 949.829  17 
  -3   2  16 7932.43 814.544  14 
   3  -2  16 6671.56 843.273   9 
   3   2  16 6495.22 1033.35  16 
   3  -2 -16 5276.08 1141.96  12 
  -3  -2 -16 5633.77 882.109  10 
  -3  -2  16 7083.90 1056.92  16 
  -3   2 -16 6487.95 969.677  10 
  -3   2  16 7039.55 830.931  26 
   3  -2  16 7599.33 818.457  15 
  -3  -2  16 6800.75 965.439  24 
  -3  -2  16 7021.98 910.749  26 
  -3  -2 -16 7931.18 965.705  23 
  -3   2  16 7885.69 806.513   6 
   3   2  16 7483.47 768.294  14 
  -3   2  16 7009.07 943.017  17 
   3  -2  16 7428.89 786.162  14 
  -3  -2  16 6718.11 976.312  25 
  -3   2  16 6234.81 1120.24  16 
   3   2  16 7520.75 885.716  17 
  -3  -2  16 7180.67 1033.52  21 
  -3  -2  16 7432.10 823.210  14 
  -3   2  16 6527.03 1008.82  24 
   3   2  16 8088.59 803.628   6 
  -3  -2 -16 5765.98 982.339  12 
   3  -2  16 6690.27 993.699  16 
  -3  -2  17 2266.97 607.845  16 
  -3   2 -17 1835.03 536.584  10 
   3   2  17 2223.89 463.712  17 
  -3  -2  17 2087.22 472.899  17 
  -3   2  17 2444.71 449.050   6 
  -3  -2  17 2231.38 518.848  25 
   3  -2  17 2502.99 627.385  16 
  -3  -2  17 2456.04 533.955  26 
  -3   2  17 2462.07 635.345  25 
  -3  -2  17 2264.63 472.265  14 
   3  -2  17 2627.68 473.008  14 
   3   2  17 1760.97 542.572  16 
  -3  -2 -17 1830.74 535.121  10 
   3  -2 -17 1506.91 642.010  12 
  -3   2  17 2555.61 483.027  14 
  -3   2  17 2432.59 619.375  24 
  -3  -2  17 2222.42 546.870  24 
   3   2  17 2598.09 468.840   6 
   3  -2  17 2355.46 570.196  17 
  -3   2  17 2422.42 550.029  17 
   3  -2  17 1827.46 451.183   9 
   3   2  17 2558.25 453.288  14 
   3  -2  17 2700.19 482.482  15 
  -3   2  17 2140.44 651.251  16 
  -3  -2 -17 1849.38 563.780  12 
  -3  -2  17 2598.64 654.656  21 
  -3   2  17 2335.32 472.571  26 
   3  -2  18 78.0771 36.3766  15 
  -3   2  18-0.53639 120.037  25 
  -3  -2  18-63.8151 142.418  25 
  -3   2  18 35.3211 153.518  17 
  -3  -2  18 38.5384 173.192  17 
   3   2  18-147.998 186.419  17 
   3   2  18 38.9129 13.5661  14 
   3  -2  18 43.0836 65.1774  16 
  -3   2  18 14.4381 72.2229  14 
  -3   2  18 56.5858 105.149   6 
   3   2  18 123.752 194.137  16 
   3  -2 -18 18.6959 250.306  12 
  -3   2  18 261.496 220.969  26 
  -3  -2  18 106.400 143.593  16 
  -3  -2 -18 69.0294 190.366  10 
  -3  -2  18-256.087 185.216  21 
  -3  -2  18-14.9937 97.9203  24 
   3   2  18 142.254 132.725   6 
   3  -2  18 71.7759 31.0303   9 
  -3   2  18 149.868 231.242  24 
  -3  -2 -18-4.43264 81.4478  12 
   3  -2  18 68.8778 50.7789  14 
  -3   2 -18 99.7026 131.153  10 
  -3  -2  18 36.6553 150.559  14 
  -3   2  18 283.725 288.871  16 
   3  -2 -19 112.686 105.009  12 
   3  -2  19 638.175 283.457  21 
  -3  -2  19 678.446 335.427  21 
  -3   2  19 708.827 273.886  17 
   3  -2  19 1024.27 308.343  15 
  -3   2  19 686.515 302.840  25 
   3   2  19 572.655 214.553  17 
   3   2  19 654.215 202.554  14 
  -3  -2  19 956.264 386.511  16 
  -3  -2 -19 328.014 164.567  10 
  -3  -2  19 1079.94 383.407  25 
  -3  -2  19 760.850 266.768  24 
  -3   2  19 772.284 326.674  24 
   3   2  19 727.986 253.301   6 
   3  -2  19 920.096 289.870  14 
  -3   2  19 778.409 401.121  16 
  -3  -2  19 837.085 301.975  14 
  -3   2  19 847.109 294.474  14 
   3  -2  19 612.702 294.377  16 
   3   2  19 584.830 287.190  16 
  -3   2  19 738.918 270.020   6 
  -3  -2 -19 363.861 238.592  12 
  -3  -2  19 784.801 330.634  17 
  -3   2 -19 522.727 286.835  10 
  -3   2  20 591.854 349.987  16 
  -3   2  20 693.379 210.194   6 
   3  -2  20 731.810 334.158  21 
  -3  -2  20 698.271 256.828  17 
   3  -2  20 608.452 219.488  14 
  -3  -2  20 545.760 271.956  24 
  -3  -2  20 872.432 310.548  21 
  -3   2  20 610.935 194.142  14 
   3  -2  20 613.801 238.730  16 
  -3  -2 -20 391.162 171.020  12 
   3  -2  20 814.490 230.034  15 
  -3   2  20 430.640 174.887  25 
   3   2  20 718.955 231.094   6 
   3   2  20 520.935 196.373  15 
  -3  -2  20 681.744 278.595  16 
   3   2  20 864.997 399.379  14 
  -3  -2  20 601.009 263.287  25 
   3   2  20 684.427 292.130  16 
  -3  -2  20 747.385 282.386  14 
  -3   2  20 748.808 317.763  21 
   3   2  20 685.018 248.149  17 
  -3   2  20 339.202 224.628  24 
  -3   2 -20 653.016 270.499  10 
  -3  -2 -20 269.466 177.071  10 
  -3   2  20 525.139 215.542  17 
  -3  -2 -21 8726.26 945.983  10 
  -3   2  21 12851.1 1259.23  16 
  -3   2  21 14620.3 1173.40  17 
   3  -2  21 17210.0 1380.20  21 
  -3  -2  21 14801.5 1299.38  16 
   3   2  21 15424.5 990.547  15 
  -3   2  21 18061.1 1094.87  14 
  -3   2  21 15574.5 1283.74  21 
  -3  -2  21 16664.2 1146.92  14 
   3   2  21 12545.6 1166.00  16 
  -3  -2  21 14733.1 1142.54  17 
  -3  -2  21 13861.4 1080.69  25 
   3   2  21 17650.8 1066.72  14 
  -3   2 -21 14067.7 1194.90  10 
   3  -2  21 16390.6 1035.83  14 
  -3  -2  21 16858.0 1349.57  21 
   3  -2  21 18367.3 1043.84  15 
  -3   2  21 14164.6 1078.24  25 
  -3  -2  21 14071.5 1090.41  24 
   3  -2  21 15139.1 1279.15  16 
  -3   2  21 14808.0 1109.33  24 
  -3   2  22 1833.03 391.281  21 
  -3   2 -22 1544.37 365.341  10 
   3  -2  22 2273.94 318.682  15 
   3   2  22 1046.65 299.265  16 
   3   2  22 2212.99 332.119  14 
  -3  -2  22 1282.95 296.948  25 
  -3  -2  22 1768.45 410.044  16 
  -3  -2  22 1264.09 286.557  24 
   3  -2  22 1463.10 288.481  14 
  -3  -2  22 1678.97 335.450  14 
   3  -2  22 1984.54 414.922  21 
  -3  -2  22 1752.43 380.339  21 
  -3   2  22 1353.73 389.087  16 
  -3   2  22 1780.13 365.676  17 
   3   2 -22 638.092 293.416  10 
   3  -2  22 1747.87 384.906  16 
  -3   2  22 2111.13 341.222  14 
  -3  -2  23 1355.83 294.233  21 
   3   2 -23 571.955 214.605  10 
   3  -2  23 909.058 227.092  16 
  -3   2  23 565.429 203.015  16 
   3  -2  23 1358.37 295.299  21 
  -3   2  23 1274.09 255.186  17 
   3   2  23 1272.78 302.740  21 
  -3   2  23 1421.22 253.431  14 
  -3   2 -23 769.209 228.588  10 
  -4  -2   0 125801. 4828.44   3 
  -4  -2   0 117168. 4564.21   2 
   4   2   0 101938. 6029.76   5 
  -4  -2   0 124928. 9219.20   4 
   4  -2   0 121650. 4565.31   1 
   4   2   0 122295. 4482.16   1 
   4   2   0 106231. 6704.16   4 
  -4  -2   0 110139. 3623.06   1 
  -4  -2   1 31024.4 2548.15   3 
  -4   2  -1 26535.6 2118.09   1 
   4  -2  -1 25146.5 1997.85   1 
   4   2   1 34514.5 3219.62   1 
   4   2  -1 32452.1 3193.42   5 
  -4  -2  -1 33595.5 2454.63   2 
  -4  -2   1 36906.7 2746.32   2 
   4  -2   1 27759.7 2316.93   1 
   4  -2  -1 31671.7 2976.59   1 
  -4  -2  -1 33080.4 5171.06   4 
   4   2   1 33705.4 4016.34   4 
   4   2  -1 28615.1 3230.70   4 
  -4  -2  -1 30125.9 2468.55   1 
  -4  -2   1 35533.0 4655.38   4 
  -4  -2  -1 25791.7 2194.00   3 
  -4  -2   2 7631.27 1374.96   3 
  -4  -2  -2 7992.43 2709.15   4 
   4  -2  -2 5625.56 957.534   1 
  -4   2   2 6502.79 1501.07   3 
   4   2  -2 6460.91 1436.59   5 
   4   2  -2 6999.16 1349.59   3 
  -4   2   2 6893.17 1502.51   2 
   4  -2  -2 6962.55 1459.19   1 
  -4  -2  -2 7815.57 1500.49   1 
   4   2  -2 6999.00 1384.90   4 
   4   2  -2 5988.79 1204.24   2 
  -4  -2   2 5238.26 1310.17   5 
  -4   2  -2 7274.94 1177.14   1 
  -4  -2   2 7501.68 1377.98   2 
   4   2   2 6081.27 1813.05   4 
   4   2   2 7808.79 1778.07   1 
   4   2   3 11459.9 2464.84   1 
  -4   2   3 7563.97 1617.49   2 
  -4   2   3 7564.31 1639.55   3 
   4   2  -3 7667.89 1548.75   3 
  -4  -2  -3 9011.43 1739.41   1 
   4   2  -3 8497.52 1291.83   4 
   4  -2  -3 8872.02 1770.45   1 
   4   2  -3 8376.33 1574.11   2 
   4  -2  -3 7465.93 1129.50   1 
  -4  -2   3 8511.55 1651.74   5 
  -4  -2  -3 9708.79 3004.45   4 
  -4   2  -3 8553.11 1328.20   1 
  -4   2  -4 5791.37 1172.77   1 
  -4   2   4 5121.02 1436.38   3 
  -4  -2   4 5331.63 1272.99   5 
   4  -2  -4 5578.91 1656.64   1 
  -4  -2  -4 5381.24 2306.93   4 
  -4   2   4 4939.11 1369.87   2 
  -4   2   4 4342.38 1240.32   1 
  -4  -2  -4 5350.58 1466.45   1 
  -4   2   5 40922.2 3958.08   3 
  -4  -2   5 39192.4 3541.22   5 
   4  -2  -5 41303.1 4983.18   1 
  -4  -2  -5 46811.3 4716.38   1 
  -4   2  -5 42349.4 3463.73   1 
  -4  -2  -5 42158.4 7194.87   4 
  -4   2   5 42574.5 3966.21   2 
  -4   2  -6 70557.0 4779.31   1 
  -4  -2   6 39924.1 2243.55   1 
  -4   2   6 59048.1 5019.09   3 
   4   2  -6 47829.4 1447.05   1 
   4  -2  -6 54434.0 6251.32   1 
  -4  -2  -6 61873.9 9398.54   4 
  -4  -2   6 59948.1 4446.35   5 
  -4   2   6 61034.4 5086.84   2 
  -4  -2  -6 60515.9 5762.29   1 
   4  -2  -7 5419.10 2184.68   1 
  -4  -2  -7 7492.95 3565.40   4 
  -4  -2   7 8040.48 1658.19   5 
  -4   2  -7 7595.75 1611.89   1 
  -4  -2   7 6370.79 1196.43   1 
   4   2  -7 7953.16 832.428   1 
  -4  -2  -7 11443.4 2631.83   1 
  -4  -2  -8 30615.4 4575.10   1 
  -4   2   8 26564.7 1693.48  25 
   4  -2   8 31245.5 1377.01  17 
  -4   2  -8 29727.8 1484.61  10 
  -4   2   8 28009.1 1512.43  26 
  -4   2   8 26531.5 1701.77  24 
  -4  -2   8 27906.2 1573.88  24 
  -4   2   8 32849.2 1398.76  20 
  -4  -2  -8 30781.7 7269.76   4 
   4  -2   8 30570.1 1295.89   9 
  -4  -2   8 30251.3 1495.25  26 
  -4   2  -8 30762.8 1535.61  23 
  -4  -2   8 23970.8 2930.19   5 
  -4   2   8 28242.3 1486.24  17 
  -4   2   8 24707.8 1208.86  13 
   4   2  -8 25624.6 1849.05   1 
  -4  -2  -8 31524.9 1942.92  23 
  -4  -2   8 28010.6 1581.00  25 
  -4  -2  -8 31080.4 1825.28  12 
  -4   2  -8 29484.9 3549.98   1 
  -4  -2  -9 752.728 775.601   1 
  -4   2  -9 805.336 248.590  10 
  -4  -2  -9 841.088 272.200  27 
   4  -2   9 695.771 218.920  17 
  -4  -2   9 302.405 301.425   5 
   4   2  -9 834.494 366.652   1 
  -4  -2   9 754.809 266.639  21 
  -4   2  -9 697.169 243.889  23 
   4  -2   9 694.670 180.374   9 
  -4   2   9 654.456 170.635  14 
   4  -2   9 812.807 194.481   6 
   4   2   9 684.155 184.720  14 
   4  -2   9 694.860 238.701  16 
  -4  -2   9 694.911 293.469  26 
   4  -2  -9 229.221 504.336   1 
  -4  -2  -9 1033.23 389.314  23 
  -4  -2   9 674.526 193.409  14 
  -4  -2   9 477.314 208.677  25 
  -4   2   9 778.977 283.414  24 
   4   2   9 677.396 191.528   6 
  -4   2   9 552.371 195.894  17 
   4  -2  -9 675.776 733.464   4 
  -4   2  -9 808.160 590.402   1 
  -4   2   9 721.536 232.750  20 
  -4   2   9 751.070 187.319   8 
  -4  -2  -9 470.524 1136.48   4 
  -4  -2   9 719.799 297.726  24 
  -4   2   9 487.325 218.532  25 
  -4  -2  -9 735.807 303.819  12 
  -4   2   9 669.789 180.547  26 
   4  -2  10 11804.7 751.955  14 
  -4  -2  10 12281.6 1075.88  26 
  -4   2  10 12139.6 1077.77  26 
  -4   2  10 12247.0 1092.39  17 
   4  -2  10 13293.7 1003.04  17 
  -4  -2  10 12255.6 769.008   6 
  -4   2  10 11359.7 1220.80  24 
  -4  -2  10 11748.0 823.001  14 
  -4   2 -10 12302.1 2554.45   1 
  -4  -2 -10 11707.3 970.370  10 
   4  -2  10 12794.7 1088.28  16 
  -4  -2 -10 14597.9 3469.41   1 
   4  -2 -10 5521.23 1916.36   4 
  -4  -2 -10 13153.9 1032.49  27 
  -4  -2  10 12417.6 1167.57  25 
   4  -2  10 13119.6 932.367   9 
  -4  -2  10 11202.9 1039.52  21 
  -4   2  10 12203.4 865.094   8 
   4   2  10 12854.1 860.517  14 
   4  -2 -10 6169.40 2777.00   1 
  -4  -2  10 12256.5 1129.17  16 
  -4   2  10 13081.2 824.761  14 
  -4  -2  10 12918.8 1000.15  17 
   4   2  10 14036.2 876.999   6 
   4   2  10 14418.4 958.072  17 
  -4   2  10 13111.1 864.232   6 
  -4  -2 -10 13517.2 1318.52  23 
  -4   2  10 14012.5 1000.32  20 
  -4  -2  10 12495.0 1160.16  24 
  -4  -2 -10 13770.9 1374.01  12 
   4  -2 -10 9444.80 904.302   7 
  -4   2 -10 15003.2 1163.89  23 
   4  -2  10 12910.7 825.237   6 
  -4  -2 -10 12741.2 5421.77   4 
  -4   2  10 11271.5 1211.09  25 
  -4   2 -10 12957.8 1076.40  10 
   4   2  11 23895.0 1668.04  16 
  -4  -2  11 24702.1 1475.79  17 
  -4   2  11 23104.7 1512.78  26 
   4   2  11 25696.6 1225.37   6 
  -4  -2 -11 25537.5 1488.97  27 
  -4  -2 -11 20730.6 1372.22  10 
  -4   2 -11 22855.3 1525.60  10 
  -4  -2  11 22744.8 1186.68  14 
   4   2  11 26309.5 1382.90  17 
  -4  -2  11 21133.9 1480.87  21 
  -4  -2  11 25815.4 1569.94  26 
  -4   2  11 22921.3 1240.94   8 
  -4  -2 -11 23659.8 4533.34   1 
   4  -2  11 24508.9 1428.46  17 
   4  -2  11 23793.9 1182.55   6 
  -4   2  11 25898.3 1240.57   6 
  -4   2  11 23059.4 1550.16  17 
  -4   2  11 22416.6 1721.89  24 
   4  -2 -11 12608.7 3766.71   1 
   4  -2  11 23292.3 1550.67  16 
  -4   2 -11 24452.0 3868.18   1 
   4   2  11 23392.7 1190.14  14 
  -4   2  11 22402.9 1715.79  25 
  -4  -2  11 23135.0 1640.54  24 
   4  -2  11 22709.9 1311.29   9 
  -4  -2  11 23543.4 1134.92   6 
  -4  -2  11 22728.3 1619.37  25 
  -4  -2  11 22953.0 1620.49  16 
  -4   2  11 24007.6 1171.04  14 
  -4  -2 -11 25725.2 7475.99   4 
  -4  -2 -11 24732.2 1792.06  23 
  -4  -2 -11 23267.4 1840.46  12 
   4  -2 -11 19424.9 1273.02   7 
   4  -2  11 23304.1 1098.87  14 
  -4   2  12 23870.1 1618.65  17 
  -4   2  12 22760.4 1309.89   8 
   4   2  12 27966.9 1504.07  17 
   4  -2  12 26759.4 1554.14  17 
  -4  -2  12 23199.9 1553.84  17 
   4   2  12 25572.5 1795.28  16 
  -4  -2  12 26313.2 1780.70  16 
  -4  -2 -12 21598.4 1481.09  10 
  -4   2 -12 23767.2 1666.18  10 
   4  -2  12 24633.6 1218.76  14 
  -4  -2  12 26395.5 1649.04  26 
  -4  -2 -12 24885.7 1913.36  12 
   4   2  12 28641.9 1338.28   6 
  -4  -2  12 24625.7 1637.04  21 
  -4  -2  12 25697.5 1784.30  25 
  -4  -2  12 24227.3 1306.94  14 
  -4   2  12 23964.5 1843.69  25 
  -4  -2 -12 25081.5 7942.61   4 
   4  -2  12 25958.9 1295.21   6 
  -4   2  12 26312.3 1289.54  14 
   4  -2  12 25768.1 1426.71   9 
  -4   2  12 28075.5 1345.04   6 
  -4   2 -12 26885.8 4362.05   1 
  -4  -2  12 25522.5 1245.89   6 
  -4   2  12 26266.2 1602.24  26 
   4   2  12 25556.1 1306.77  14 
   4  -2  12 25502.6 1705.63  16 
   4  -2 -12 14089.8 3946.10   1 
  -4  -2 -12 26723.6 1842.86  23 
  -4   2  12 23971.5 1835.24  24 
  -4  -2 -12 23053.2 4659.62   1 
  -4  -2  12 25476.6 1771.72  24 
  -4  -2  13 13902.9 1289.83  21 
  -4   2  13 13026.8 1222.17  17 
   4   2  13 15965.5 1100.92   9 
   4   2  13 16444.1 1046.68   6 
  -4  -2  13 14191.7 1045.29  14 
  -4  -2  13 14680.3 1396.73  16 
  -4  -2 -13 12744.5 1194.46  10 
   4  -2  13 15052.0 1359.27  16 
  -4   2 -13 13424.4 1263.05  10 
   4  -2  13 15053.5 992.642  14 
  -4  -2  13 14260.7 1391.83  24 
   4   2  13 15180.4 1035.79  14 
  -4   2  13 13795.9 1207.84  26 
  -4  -2  13 14102.1 1218.06  17 
  -4   2  13 13969.9 1444.86  24 
   4   2  13 15653.7 1177.91  17 
  -4  -2 -13 15171.9 1528.11  12 
  -4  -2 -13 15069.5 1383.65  23 
   4  -2  13 16173.8 1245.70  17 
  -4   2  13 14950.2 1009.63  14 
  -4   2  13 13738.6 1029.21   8 
  -4   2  13 14060.3 1476.40  25 
  -4  -2  13 14396.6 1271.09  26 
  -4  -2  13 13894.5 1375.03  25 
  -4   2  13 15263.7 1029.12   6 
   4  -2  13 15144.1 1134.69   9 
   4   2  13 13782.7 1388.88  16 
  -4  -2 -13 13871.6 6226.41   4 
   4   2  14 3100.30 537.518  17 
  -4   2  14 2735.73 568.509  17 
  -4  -2  14 3194.36 669.201  16 
  -4  -2  14 2703.33 573.281  17 
   4  -2  14 3028.98 566.140  17 
  -4  -2  14 2969.54 503.935  14 
  -4  -2 -14 2760.81 559.890  10 
  -4  -2  14 2857.81 604.938  24 
  -4   2  14 2726.66 671.301  25 
  -4   2 -14 2859.60 590.478  10 
  -4  -2 -14 3244.22 682.164  23 
  -4  -2  14 3003.48 619.504  21 
   4   2  14 3034.85 476.113   6 
  -4   2  14 3307.64 485.005  14 
  -4  -2 -14 2602.69 646.176  12 
   4  -2  14 3053.38 639.696  16 
   4  -2  14 3098.13 559.664   9 
   4  -2  14 3334.72 513.606  15 
   4   2  14 2486.12 606.051  16 
  -4  -2  14 3293.96 616.251  26 
  -4  -2  14 2932.83 626.209  25 
  -4   2  14 3117.52 473.716   6 
   4   2  14 3244.59 498.519   9 
   4   2  14 3115.70 477.068  14 
   4  -2  14 3120.74 477.965  14 
  -4   2  14 2875.28 723.778  24 
  -4   2  14 2787.89 502.810  26 
  -4  -2  15 5415.71 764.797  17 
   4   2  15 5848.59 764.299  17 
  -4  -2  15 5966.84 724.894  14 
   4  -2  15 5596.17 658.939  14 
   4   2  15 6246.11 696.954   9 
   4   2  15 5017.21 924.167  16 
  -4   2 -15 5363.00 844.114  10 
   4  -2  15 6229.89 727.003  15 
  -4  -2  15 5985.62 921.096  24 
  -4  -2  15 5821.29 825.824  26 
   4  -2  15 5790.44 771.103   9 
  -4   2  15 5073.20 908.501  25 
   4   2  15 6112.03 685.251  14 
  -4   2  15 6269.55 699.792  14 
  -4   2  15 4754.11 950.406  16 
   4   2  15 5822.15 688.439   6 
  -4   2  15 5240.24 822.713  17 
  -4  -2 -15 6349.37 905.756  23 
  -4  -2  15 5506.87 861.171  21 
  -4  -2 -15 5027.58 798.170  10 
  -4  -2 -15 5878.58 948.857  12 
  -4  -2  15 6028.38 944.828  16 
   4  -2  15 5660.11 883.239  16 
  -4   2  15 6318.46 694.698   6 
   4  -2 -15 4328.50 1019.39  12 
  -4   2  15 5427.50 944.343  24 
  -4   2  15 6026.04 800.165  26 
  -4  -2  15 6126.79 926.081  25 
   4  -2  16 277.641 143.435  14 
   4  -2  16 228.309 318.264  16 
  -4  -2  16 55.6777 70.7050  21 
  -4  -2  16-93.4874 223.031  26 
  -4   2  16 141.440 204.229  17 
  -4  -2  16 53.6905 84.7077  17 
   4   2  16 44.2815 134.481  17 
  -4  -2 -16 155.089 165.704  10 
   4   2  16-20.4522 83.3447   9 
  -4   2  16 179.476 207.887  25 
   4   2  16 152.049 226.382  16 
   4  -2  16-23.2309 87.1498   9 
   4   2  16 165.132 61.7427  14 
  -4   2  16 19.6939 192.034  24 
  -4  -2  16 24.0865 101.749  16 
  -4   2  16 104.925 109.298   6 
  -4   2  16 318.503 269.828  16 
  -4  -2 -16 173.819 55.3925  23 
  -4  -2  16 55.2903 82.9334  24 
  -4  -2  16 251.515 173.032  25 
  -4   2  16-34.5160 121.978  14 
  -4   2  16 170.634 170.239  26 
  -4   2 -16 187.880 126.694  10 
   4   2  16-8.39642 98.7923   6 
   4  -2 -16 170.045 184.218  12 
   4  -2  16 143.902 93.0088  15 
  -4  -2 -16-34.5201 144.819  12 
  -4  -2  16 121.903 148.947  14 
   4   2  17 5262.50 727.915  17 
  -4   2  17 5716.90 668.888   6 
  -4  -2  17 5023.99 838.088  25 
   4  -2  17 5108.24 858.699  16 
  -4   2  17 4643.55 907.794  16 
   4   2  17 4661.72 865.096  16 
  -4  -2  17 4878.06 798.935  17 
  -4  -2  17 5194.69 889.603  16 
  -4   2  17 5193.86 738.203  26 
  -4  -2  17 5425.26 874.187  21 
   4   2  17 5670.26 687.052  14 
   4   2  17 6208.40 697.340   6 
  -4  -2 -17 4400.79 818.266  12 
  -4   2 -17 5216.85 869.975  10 
   4  -2  17 4724.06 692.667  14 
  -4   2  17 5576.97 919.358  24 
   4  -2  17 4212.64 725.414   9 
   4  -2  17 5640.97 738.871  15 
  -4  -2  17 5161.39 730.074  14 
   4  -2 -17 3249.51 955.141  12 
  -4   2  17 5490.02 716.176  14 
  -4  -2 -17 5922.04 820.153  23 
  -4   2  17 4477.22 794.369  17 
  -4  -2 -17 3663.40 746.275  10 
   4   2  17 5793.64 655.128   9 
  -4   2  17 5125.31 872.551  25 
  -4  -2  17 5558.65 891.078  24 
  -4  -2  17 5740.48 801.316  26 
  -4   2  18 5463.69 845.340  17 
  -4  -2  18 5866.22 836.527  17 
  -4  -2  18 6229.03 939.220  21 
  -4   2 -18 5997.84 880.053  10 
  -4   2  18 5249.75 970.267  16 
  -4  -2  18 6161.25 974.236  16 
  -4  -2  18 6082.25 898.150  24 
   4  -2  18 5515.20 722.643  14 
  -4  -2 -18 4327.28 807.932  12 
  -4   2  18 7012.24 726.034   6 
  -4   2  18 5827.92 906.207  24 
   4  -2  18 6272.35 927.141  16 
  -4  -2  18 6326.08 797.227  14 
   4   2  18 4594.65 869.928  16 
  -4   2  18 5554.64 737.815  26 
   4  -2  18 6215.81 759.894  15 
  -4  -2  18 5766.31 896.571  25 
   4   2  18 6718.43 728.476  14 
   4   2  18 6977.99 750.173   6 
  -4  -2 -18 4459.79 782.307  10 
   4   2  18 5429.70 722.538  17 
  -4   2  18 6781.07 752.990  14 
  -4  -2  18 6511.03 857.891  26 
   4  -2 -18 2792.80 875.515  12 
   4  -2  18 5435.74 778.419   9 
  -4   2  18 5817.66 922.064  25 
   4  -2 -19 4394.32 949.820  12 
  -4   2  19 8850.91 994.671  17 
  -4   2  19 8320.38 1042.85  21 
  -4  -2 -19 5998.10 844.987  10 
  -4  -2  19 7597.95 898.123  17 
  -4   2  19 7612.64 1117.24  16 
   4   2  19 6950.80 979.677  16 
   4  -2  19 9313.04 1100.81  21 
  -4   2  19 9544.94 869.370  14 
  -4  -2  19 8307.45 885.601  14 
  -4  -2 -19 5989.64 858.786  12 
  -4   2  19 7787.76 817.692  26 
   4  -2  19 8253.06 810.310  14 
  -4  -2  19 8901.54 1069.37  21 
  -4   2  19 8350.30 1025.19  25 
  -4  -2  19 8468.37 1014.14  24 
  -4   2  19 8928.07 816.487   6 
   4  -2  19 9144.91 862.759  15 
   4   2  19 9401.06 830.601   6 
   4  -2  19 8003.05 1016.92  16 
  -4  -2  19 8291.92 1078.29  16 
   4   2  19 8136.42 871.747  17 
  -4   2  19 8252.76 1018.04  24 
  -4   2 -19 7773.45 1030.69  10 
  -4  -2  19 8195.38 1001.25  25 
   4   2  19 9551.61 828.506  14 
  -4  -2  20 6531.55 730.818  14 
  -4  -2  20 6008.21 752.592  17 
   4  -2  20 6178.87 840.510  21 
  -4  -2  20 5717.85 764.664  24 
   4   2  20 4969.49 754.641  16 
  -4  -2 -20 3563.82 625.878  10 
  -4   2  20 4735.86 807.378  16 
   4   2  20 6552.23 667.976   6 
  -4   2  20 5665.61 774.237  25 
  -4  -2  20 5727.46 829.393  16 
  -4   2  20 5746.94 788.842  24 
  -4   2 -20 4991.50 777.956  10 
   4   2  20 6660.05 668.606  14 
   4  -2  20 5541.37 778.730  16 
  -4   2  20 6658.30 693.038  14 
  -4  -2  20 5399.08 754.223  25 
   4  -2  20 5601.45 642.146  14 
  -4  -2  20 5830.66 832.828  21 
  -4  -2 -20 3832.71 603.414  12 
   4  -2  20 7039.12 702.108  15 
  -4   2  20 5157.00 724.105  17 
  -4   2  20 5608.85 797.525  21 
   4   2  20 5930.91 671.510  15 
   4  -2  21 206.193 130.254  15 
  -4   2  21 305.564 159.241  24 
  -4  -2  21 363.284 150.017  25 
  -4  -2  21 96.1470 104.088  16 
  -4  -2 -21 57.3261 67.0711  10 
  -4  -2  21-48.8531 95.6334  14 
  -4   2  21-11.1081 46.7877  25 
  -4   2 -21 168.569 140.789  10 
   4  -2  21 60.5689 51.3346  16 
   4   2  21 60.1032 63.8956  16 
   4  -2  21 3.40769 80.0887  21 
  -4   2  21 166.898 36.0780  14 
   4  -2  21-106.512 96.4644  14 
  -4  -2  21 144.501 143.864  17 
   4   2  21 109.004 74.3804  15 
  -4   2  21 164.416 184.131  17 
  -4  -2  21 63.4736 117.966  21 
  -4   2  21 33.8700 48.6669  21 
  -4  -2  21 264.668 185.343  24 
   4   2  21 83.6545 85.0569  14 
  -4   2  21-53.5061 107.423  16 
  -4  -2  22 590.920 204.466  24 
   4  -2  22 840.932 251.601  16 
  -4  -2  22 763.060 246.152  16 
   4  -2  22 1113.65 235.352  15 
   4   2  22 867.657 204.577  14 
  -4   2  22 736.513 193.994  25 
  -4  -2  22 840.020 250.135  21 
  -4   2  22 719.422 198.199  24 
   4   2  22 873.047 186.099  15 
   4   2 -22 476.651 263.016  10 
  -4  -2  22 743.533 227.577  25 
  -4   2  22 699.085 228.605  16 
   4  -2  22 1027.69 296.949  21 
  -4   2  22 1025.94 235.508  14 
  -4   2  22 626.326 207.436  21 
  -4   2  22 832.161 248.775  17 
  -4   2 -22 637.481 238.257  10 
   4   2  22 438.541 163.449  16 
   4   2 -23 372.193 189.858  10 
   5   2   0-140.131 205.094   1 
  -5  -2   0-209.725 539.046   4 
  -5  -2   0-51.4756 294.855   3 
  -5  -2   0-105.785 26.0835   2 
  -5  -2   0 143.590 126.999   1 
   5   2   0 64.5666 382.328   4 
   5  -2   0-43.3685 163.964   1 
   5  -2  -1 20450.0 1989.75   1 
  -5   2   1 20186.9 2867.54   2 
   5   2  -1 19643.4 3100.35   4 
  -5  -2  -1 19890.8 2215.06   2 
  -5   2   1 20382.0 2911.00   3 
  -5  -2  -1 22501.5 2431.11   3 
  -5  -2  -1 30115.6 5302.14   4 
  -5  -2   1 20897.3 2389.16   2 
  -5  -2   1 21591.2 2496.25   3 
   5  -2  -1 24480.3 2892.56   1 
  -5   2  -1 20399.4 1956.12   1 
  -5  -2  -1 21523.5 1958.67   1 
   5   2   1 26003.9 2952.69   1 
  -5   2   2 21729.9 2929.60   2 
   5   2  -2 22136.9 3045.75   4 
   5  -2  -2 17762.5 1814.35   1 
  -5  -2   2 23397.2 2683.98   2 
  -5   2  -2 21720.7 2128.37   1 
  -5  -2  -2 27218.8 5215.96   4 
   5   2   2 22992.5 3265.01   1 
  -5  -2   2 22524.9 2623.41   3 
  -5  -2  -2 23654.0 2469.52   3 
   5  -2  -2 22183.2 2849.06   1 
  -5  -2  -2 22306.5 2369.56   2 
  -5   2   2 20854.5 2961.22   3 
  -5  -2  -2 23334.5 2400.00   1 
  -5  -2  -3 34930.2 3347.56   1 
  -5   2  -3 28756.7 2642.52   1 
   5   2   3 32089.5 4405.15   1 
   5  -2  -3 25316.4 2177.67   1 
   5  -2  -3 33706.8 3710.57   1 
   5   2  -3 30363.0 3156.87   4 
  -5   2   3 30246.6 3572.58   2 
  -5  -2  -3 36590.9 6275.26   4 
  -5   2   3 29859.6 3606.84   3 
   5   2  -4 4186.19 929.759   4 
   5  -2  -4 4638.70 671.751   5 
  -5   2   4 6035.17 1619.01   2 
  -5   2   4 5064.41 1492.19   3 
  -5   2  -4 6088.12 1272.28   1 
  -5  -2  -4 7145.24 1631.21   1 
   5  -2  -4 5406.26 1698.11   1 
  -5  -2  -4 6321.47 2726.65   4 
  -5  -2  -5 31653.5 6497.97   4 
  -5   2   5 20298.3 3072.73   3 
  -5   2  -5 26227.7 2852.74   1 
  -5   2   5 22960.7 3227.80   2 
   5  -2  -5 20228.8 3707.53   1 
  -5  -2  -5 24669.2 3344.74   1 
  -5  -2  -6-244.206 238.644   1 
  -5   2   6 167.508 414.017   2 
  -5  -2   6 87.5928 113.521   5 
   5  -2  -6-172.967 313.704   1 
  -5   2  -6-130.985 283.652   1 
  -5  -2  -6-860.407 1499.76   4 
  -5   2   6 53.1593 154.350   3 
  -5   2   7 159.125 206.723  25 
  -5   2   7 181.951 150.733  24 
  -5   2  -7 179.545 91.1397  10 
  -5  -2  -7 261.333 273.460   1 
  -5   2  -7 372.330 146.430  23 
   5  -2  -7 486.481 605.612   1 
  -5  -2   7 358.788 389.475   5 
  -5   2  -7 187.154 285.905   1 
  -5   2   7 238.190 236.156  26 
  -5   2   7 112.272 89.5252  13 
  -5  -2  -7 265.719 1074.93   4 
  -5  -2  -7 184.540 273.468  23 
  -5   2   7 248.375 116.793  20 
  -5  -2   7 140.131 46.1919  25 
  -5  -2  -7 117.991 151.028  27 
  -5  -2  -7 115.125 50.8128  12 
  -5  -2   7 307.756 151.726  24 
   5  -2   7 309.844 141.346   9 
  -5   2  -8 12116.2 1003.95  23 
  -5   2   8 9217.48 1042.51  24 
  -5   2  -8 11527.3 2290.69   1 
  -5   2   8 10263.5 981.867  26 
  -5  -2   8 11093.2 1013.96  26 
  -5  -2  -8 13060.8 4846.36   4 
  -5   2   8 9721.67 718.782   8 
  -5   2  -8 10320.1 875.166  10 
  -5  -2   8 9626.60 967.067  24 
  -5  -2   8 6653.37 1636.32   5 
  -5  -2   8 10159.1 686.086  14 
  -5   2   8 9481.62 1052.25  25 
   5  -2  -8 3876.67 2071.28   1 
   5  -2   8 10941.8 799.791   9 
  -5   2   8 9520.92 797.579  20 
  -5  -2  -8 11200.7 1007.14  27 
  -5   2   8 8462.54 745.148  13 
  -5  -2   8 9578.14 960.281  25 
  -5  -2  -8 12326.7 2726.53   1 
  -5  -2  -8 11813.7 1104.02  12 
  -5  -2  -8 11256.4 1213.36  23 
  -5  -2   8 9174.34 822.995  21 
  -5   2   8 9026.17 897.931  17 
   5  -2   9 17.4766 75.2981  16 
  -5   2  -9-83.2301 233.397   1 
  -5   2   9-0.33777 103.870  17 
  -5  -2   9 121.558 125.526  17 
  -5   2   9 25.9619 147.225  24 
  -5  -2  -9 70.4614 76.0412  10 
  -5  -2  -9 711.422 804.601   1 
  -5  -2   9 36.1244 87.6572  21 
  -5   2  -9 9.39475 57.6116  23 
  -5  -2  -9-37.0814 108.154  27 
  -5   2  -9 2.39482 20.4097  10 
  -5  -2  -9 23.9907 150.357  23 
  -5  -2   9-34.7940 67.6768  14 
   5   2   9 4.76838 57.4440  14 
  -5  -2   9-70.7940 125.348  25 
  -5   2   9 107.233 111.332  26 
   5  -2   9-54.5068 83.9112   9 
  -5   2   9 58.3094 141.409  25 
  -5  -2  -9 11.1694 78.0956  12 
  -5  -2   9 40.0087 174.443  26 
  -5  -2  -9 855.492 1136.46   4 
   5   2   9 120.681 109.190   6 
  -5  -2  -9 39.2770 127.162  18 
  -5   2   9 118.070 103.656  20 
  -5   2   9-2.21971 76.0703   8 
  -5  -2   9-17.9470 117.031  16 
  -5  -2   9 30.2000 149.692  24 
  -5   2   9 12.8049 44.3839  14 
   5  -2  -9-7.14555 459.261   1 
  -5   2  10 556.383 247.695  24 
  -5   2  10 659.733 216.427  20 
  -5   2  10 654.736 192.795  14 
   5   2  10 774.442 198.571  17 
  -5   2  10 791.580 252.109   8 
   5  -2 -10 534.169 230.432   7 
  -5  -2  10 659.757 192.245  14 
  -5   2  10 768.679 296.574  17 
   5  -2  10 672.053 228.491  16 
  -5   2  10 719.547 208.907   6 
  -5   2  10 685.329 269.892  26 
  -5  -2  10 524.198 263.943  16 
  -5  -2 -10 577.963 215.600  10 
  -5  -2 -10 780.764 721.707   1 
   5   2  10 607.974 207.516  16 
  -5  -2 -10 683.091 302.121  23 
   5  -2  10 720.475 228.483   9 
  -5   2 -10 1060.42 732.857   1 
  -5   2 -10 709.383 261.191  10 
  -5  -2  10 758.476 285.803  17 
  -5  -2  10 712.637 213.977  20 
  -5  -2  10 719.631 316.503  24 
  -5   2 -10 984.083 299.016  23 
  -5  -2  10 650.458 245.713  21 
  -5  -2 -10 2353.07 2710.90   4 
  -5   2  10 678.279 278.685  25 
   5   2  10 852.808 220.403   6 
  -5  -2 -10 984.773 391.934  12 
  -5  -2  10 813.875 308.173  26 
   5   2  10 673.971 203.101  14 
  -5  -2  10 746.738 299.180  25 
   5  -2 -10 530.038 426.352   1 
  -5  -2 -10 717.994 279.480  27 
   5   2  11 5760.67 647.959  17 
   5  -2  11 5755.45 758.330  16 
   5   2  11 5834.20 579.557   6 
   5  -2  11 4997.31 516.992  14 
  -5   2  11 4702.48 741.573  17 
   5  -2  11 5470.78 668.575   9 
  -5  -2 -11 4188.57 1964.64   1 
  -5   2  11 4768.86 848.838  24 
  -5   2  11 5000.11 744.899  26 
  -5   2 -11 5365.76 735.626  10 
  -5  -2 -11 6175.49 759.398  27 
  -5   2  11 4668.37 836.580  25 
  -5  -2  11 4988.45 792.482  24 
  -5  -2  11 5518.90 775.384  26 
   5   2  11 4768.51 762.996  16 
   5   2  11 5502.96 585.534  14 
  -5   2 -11 5437.86 1928.79   1 
  -5  -2 -11 8006.89 4314.90   4 
  -5  -2 -11 5006.68 663.148  10 
  -5   2  11 5377.98 559.595  14 
  -5   2  11 5759.51 570.108   6 
  -5  -2  11 4819.01 574.888  14 
  -5  -2 -11 5489.75 863.358  12 
  -5  -2  11 5014.56 801.286  25 
  -5  -2  11 4946.56 721.874  21 
  -5   2  11 5282.66 596.050   8 
  -5  -2  11 5056.34 774.650  16 
  -5  -2  11 5388.49 691.947  17 
  -5  -2 -11 5695.96 864.214  23 
  -5   2  12 1006.26 267.585   6 
  -5  -2 -12 782.981 277.957  10 
   5  -2  12 824.684 214.802  14 
   5   2  12 1021.42 245.794  14 
  -5  -2 -12 1117.12 390.201  23 
  -5  -2  12 886.278 329.130  25 
  -5   2  12 1278.98 458.440  24 
  -5   2  12 904.044 375.608  25 
  -5  -2  12 1083.78 327.443  26 
   5   2  12 1165.92 314.760  17 
  -5   2 -12 970.260 826.894   1 
   5  -2  12 1078.11 369.144  16 
  -5  -2  12 1194.10 406.148  24 
  -5  -2  12 1043.95 282.754  14 
  -5   2  12 905.530 253.167  14 
  -5  -2  12 864.213 356.067  16 
  -5  -2  12 878.558 315.293  21 
  -5   2  12 1051.74 386.534  17 
  -5  -2 -12 1004.69 1108.37   1 
  -5  -2  12 1013.37 323.431  17 
  -5   2 -12 1003.82 347.141  10 
   5   2  12 1123.57 262.201   6 
  -5   2  12 1016.24 278.767   8 
  -5  -2 -12 927.745 338.744  12 
  -5   2  12 1103.62 342.918  26 
   5  -2  12 981.462 283.269   9 
   5   2  12 681.734 324.599  16 
  -5  -2 -12 2660.83 2152.32   4 
  -5  -2 -13 21112.3 1684.19  23 
   5   2  13 21870.9 1386.29  17 
   5   2  13 18183.3 1563.46  16 
  -5  -2  13 19810.5 1618.61  16 
  -5  -2 -13 19592.3 1704.30  12 
   5  -2  13 19894.8 1548.83  16 
  -5  -2  13 20221.9 1247.73  14
[truncated: 1,609,556 more chars]
